# Supplementary material for: Strategy to Develop and Evaluate a Multiplex RT-ddPCR in Response to SARS-CoV-2 Genomic Evolution
Source: MDPI journal article supplement (doi:10.3390/cimb43030134), 2021-11-06

**Supplementary File S6: RT-ddPCR plots of the sensitivity assessment.** The positive droplets (blue for ORF1a assay (A) and green for RdRp\_IP4 assay (B)) are above the threshold (pink line) while the negative droplets (grey) are below the line.

A. ORF1a assay

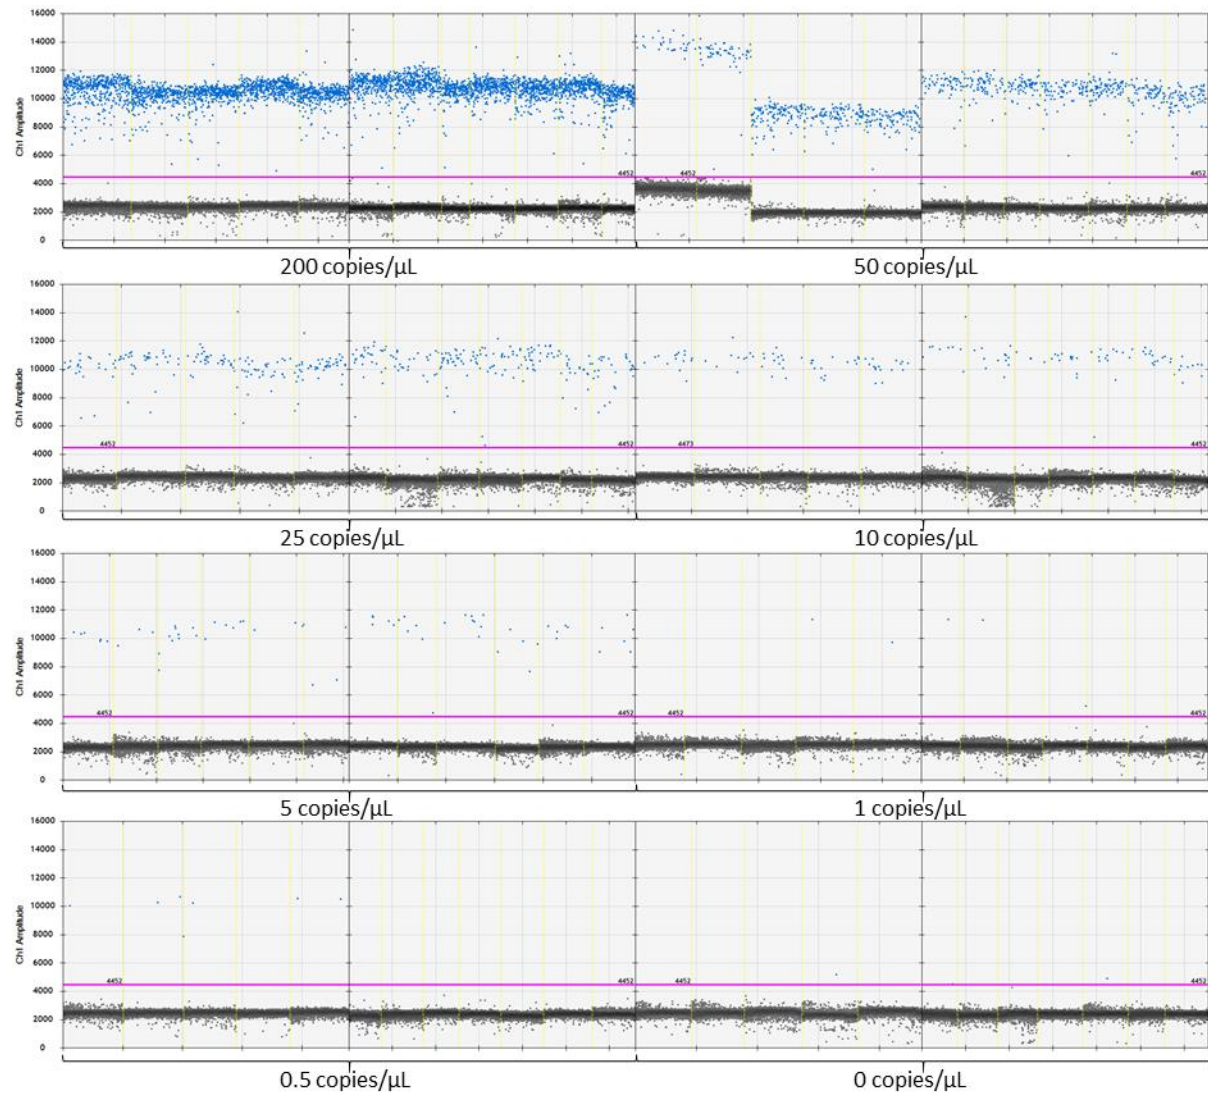

## B. RdRp\_IP4-assay

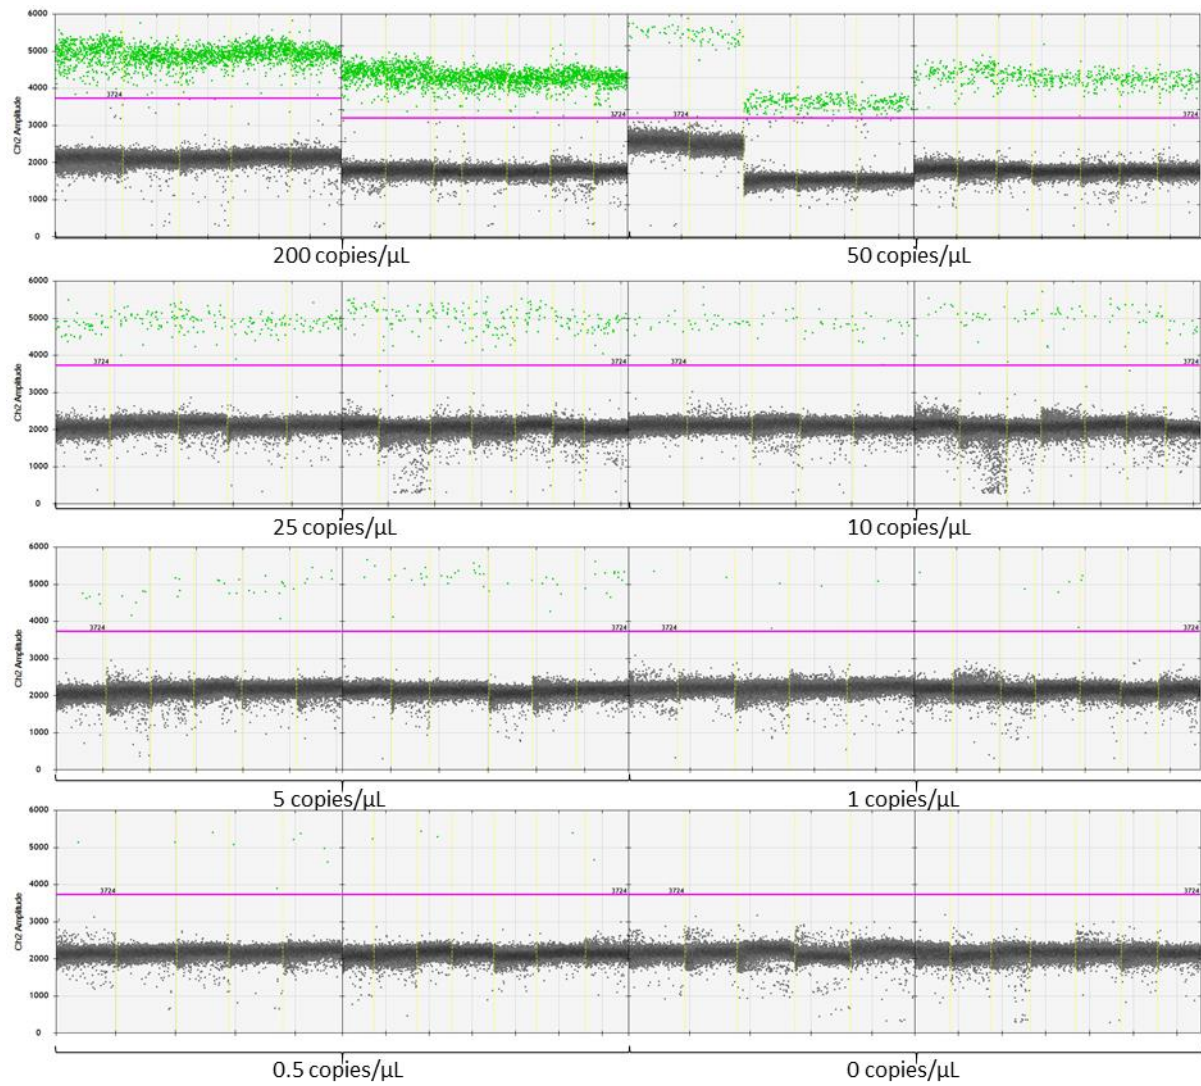

Supplement: s1 [file s1]
