# Supplementary material for: Strategy to Develop and Evaluate a Multiplex RT-ddPCR in Response to SARS-CoV-2 Genomic Evolution
Source: Curr Issues Mol Biol. 2021 Nov 6;43(3):1937–49. doi: 10.3390/cimb43030134 (PMC8928932; doi:10.3390/cimb43030134)
Supplement: Supplementary file 1 [file cimb-43-00134-s001.zip]

Archive with 7 entries (7 files):
- Supplementary File S1 - GISAID Metadata.xlsx
- Supplementary File S2 - Acknowledgment Table.pdf
- Supplementary File S3 - SCREENED input.txt
- Supplementary File S4.pdf
- Supplementary File S5.pdf
- Supplementary File S6.pdf
- Supplementary File S7.pdf
