# Supplementary material for: Strategy to Develop and Evaluate a Multiplex RT-ddPCR in Response to SARS-CoV-2 Genomic Evolution
Source: Curr Issues Mol Biol. 2021 Nov 6;43(3):1937–49. doi: 10.3390/cimb43030134 (PMC8928932; doi:10.3390/cimb43030134)
Supplement: Supplementary file 1 [file cimb-43-00134-s001.zip › Supplementary File S1 - GISAID Metadata.xlsx]

## Sheet: November
Accession.ID	Virus.name	Collection.date	Location	Host	Additional.location.information	Gender	Patient.age	Patient.status	Passage	Specimen	Additional.host.information	Lineage	Clade	Sequencing.technology	Assembly.method	Comment	Comment.type
EPI_ISL_1005008	hCoV-19/Switzerland/SO-ETHZ-370242/2020	2020-11-19	Europe / Switzerland / Solothurn	Human		unknown	unknown	unknown	Original	Nasopharyngeal and oropharyngeal swab		B.1.1.39	GR	Illumina	V-pipe
EPI_ISL_1005011	hCoV-19/Switzerland/SO-ETHZ-370244/2020	2020-11-19	Europe / Switzerland / Solothurn	Human		unknown	unknown	unknown	Original	Nasopharyngeal and oropharyngeal swab		B.1.221	G	Illumina	V-pipe
EPI_ISL_1005107	hCoV-19/Switzerland/NE-ETHZ-370110/2020	2020-11-15	Europe / Switzerland / Neuchatel	Human		unknown	unknown	unknown	Original	Nasopharyngeal and oropharyngeal swab		B.1.160	GH	Illumina	V-pipe
EPI_ISL_1005559	hCoV-19/Mexico/CMX-INMEGEN-12-04-01/2020	2020-11-20	North America / Mexico / Mexico City	Human		Male	51	unknown	Original	Oropharyngeal swab		B.1.1.222	GR	Nanopore MinION	MEDAKA
EPI_ISL_1005568	hCoV-19/Mexico/CMX-INMEGEN-12-04-10/2020	2020-11-23	North America / Mexico / Mexico City	Human		Female	49	unknown	Original	Oropharyngeal swab		B.1.1.222	GR	Nanopore MinION	MEDAKA
EPI_ISL_1005569	hCoV-19/Mexico/CMX-INMEGEN-12-04-11/2020	2020-11-23	North America / Mexico / Mexico City	Human		Male	47	unknown	Original	Oropharyngeal swab		B.1.1.222	GR	Nanopore MinION	MEDAKA
EPI_ISL_1005658	hCoV-19/Mexico/CMX-INMEGEN-01-01-03/2020	2020-11-10	North America / Mexico / Mexico City	Human		Male	32	unknown	Original	Oropharyngeal swab		B.1.1.222	GR	Nanopore MinION	MEDAKA	NS8_E64stop results in 47.9% truncation of the protein sequence. Gap of 6 nucleotides when compared to the reference sequence.	info
EPI_ISL_1005660	hCoV-19/Mexico/CMX-INMEGEN-01-01-07/2020	2020-11-18	North America / Mexico / Mexico City	Human		Female	20	unknown	Original	Oropharyngeal swab		B.1.1.222	GR	Nanopore MinION	MEDAKA	NS8_E64stop results in 47.9% truncation of the protein sequence. Gap of 6 nucleotides when compared to the reference sequence.	info
EPI_ISL_1007678	hCoV-19/South Korea/Chosun-CoV575_SP/2020	2020-11-09	Asia / South Korea / Gwangju	Human		Female	51	Released	Vero	Sputum		B.1.497	GH	Illumina NovaSeq 6000	bowtie v.1.1.2 and samtools mpileup (samtools v.1.9)
EPI_ISL_1007679	hCoV-19/South Korea/Chosun-CoV647_NP/2020	2020-11-26	Asia / South Korea / Gwangju	Human		Female	37	Released	Vero	Nasopharyngeal swab		B.1.497	GH	Illumina NovaSeq 6000	bowtie v.1.1.2 and samtools mpileup (samtools v.1.9)
EPI_ISL_1007700	hCoV-19/Spain/CB-IBV-98012984/2020	2020-11-12	Europe / Spain / Cantabria / Santander	Human	Patient residence: Europe/Spain/Cantabria/Santander	Male	83	unknown	Original			B.1.177	GV	Illumina_NextSeq	BWA/IVAR
EPI_ISL_1007702	hCoV-19/Spain/CB-IBV-98012986/2020	2020-11-12	Europe / Spain / Cantabria / Santander	Human	Patient residence: Europe/Spain/Cantabria/Camargo	Male	81	unknown	Original			B.1.177	GV	Illumina_NextSeq	BWA/IVAR
EPI_ISL_1007705	hCoV-19/Spain/CB-IBV-98013025/2020	2020-11-28	Europe / Spain / Cantabria / Santander	Human	Patient residence: Europe/Spain/Cantabria/Cillorigo_de_Liebana	Female	43	unknown	Original			B.1.177	GV	Illumina_NextSeq	BWA/IVAR
EPI_ISL_1007706	hCoV-19/Spain/CB-IBV-98013026/2020	2020-11-28	Europe / Spain / Cantabria / Santander	Human	Patient residence: Europe/Spain/Basque_Country/Irun	Male	4	unknown	Original			B.1.177	GV	Illumina_NextSeq	BWA/IVAR
EPI_ISL_1007708	hCoV-19/Spain/CB-IBV-98013029/2020	2020-11-10	Europe / Spain / Cantabria / Santander	Human	Patient residence: Europe/Spain/Cantabria/Escobedo	Male	87	unknown	Original			B.1.177	GV	Illumina_NextSeq	BWA/IVAR
EPI_ISL_1007711	hCoV-19/Spain/CB-IBV-98013054/2020	2020-11-25	Europe / Spain / Cantabria / Santander	Human	Patient residence: Europe/Spain/Cantabria/Cillorigo_de_Liebana	Female	40	unknown	Original			B.1.177	GV	Illumina_NextSeq	BWA/IVAR
EPI_ISL_1008426	hCoV-19/Sweden/21-20403/2020	2020-11-19	Europe / Sweden / Uppsala	Human		Female	36	unknown	Original			B.1.1.80	GR	Ion Torrent S5 XL, Ion AmpliSeq SARS-CoV-2	Consensus extraction from NC_045512 using torrent suite variantCaller with majority wins and positions with lower than 20x coverage masked with N	Gap of 23 nucleotides when compared to the reference sequence.	info
EPI_ISL_1008427	hCoV-19/Sweden/21-20404/2020	2020-11-16	Europe / Sweden / Uppsala	Human		Male	20	unknown	Original			B.1.1	GR	Ion Torrent S5 XL, Ion AmpliSeq SARS-CoV-2	Consensus extraction from NC_045512 using torrent suite variantCaller with majority wins and positions with lower than 20x coverage masked with N	Gap of 23 nucleotides when compared to the reference sequence.	info
EPI_ISL_1008428	hCoV-19/Sweden/21-20406/2020	2020-11-12	Europe / Sweden / Uppsala	Human		Female	70	unknown	Original			B.1.160	GH	Ion Torrent S5 XL, Ion AmpliSeq SARS-CoV-2	Consensus extraction from NC_045512 using torrent suite variantCaller with majority wins and positions with lower than 20x coverage masked with N
EPI_ISL_1008429	hCoV-19/Sweden/21-20407/2020	2020-11-09	Europe / Sweden / Uppsala	Human		Female	31	unknown	Original			B.1.258	G	Ion Torrent S5 XL, Ion AmpliSeq SARS-CoV-2	Consensus extraction from NC_045512 using torrent suite variantCaller with majority wins and positions with lower than 20x coverage masked with N	Gap of 6 nucleotides when compared to the reference sequence.	info
EPI_ISL_1008430	hCoV-19/Sweden/21-20408/2020	2020-11-09	Europe / Sweden / Uppsala	Human		Female	79	unknown	Original			B.1.160	GH	Ion Torrent S5 XL, Ion AmpliSeq SARS-CoV-2	Consensus extraction from NC_045512 using torrent suite variantCaller with majority wins and positions with lower than 20x coverage masked with N
EPI_ISL_1008431	hCoV-19/Sweden/21-20409/2020	2020-11-05	Europe / Sweden / Uppsala	Human		Male	23	unknown	Original			B.1.1.70	GR	Ion Torrent S5 XL, Ion AmpliSeq SARS-CoV-2	Consensus extraction from NC_045512 using torrent suite variantCaller with majority wins and positions with lower than 20x coverage masked with N
EPI_ISL_1008552	hCoV-19/Sweden/21-50802/2020	2020-11-24	Europe / Sweden / Stockholm	Human		Female	93	unknown	Original			B.1.177	GV	Ion Torrent S5 XL, Ion AmpliSeq SARS-CoV-2	Consensus extraction from NC_045512 using torrent suite variantCaller with majority wins and positions with lower than 20x coverage masked with N
EPI_ISL_1009168	hCoV-19/USA/TN-UT-1696/2020	2020-11-11	North America / USA / Tennessee	Human		Male	34	unknown	Original	Nasopharyngeal swab		B.1.2	GH	Illumina MiSeq	CLC Genomics Workbench 21.10
EPI_ISL_1009177	hCoV-19/USA/TN-UT-1710/2020	2020-11-12	North America / USA / Tennessee	Human		Female	31	unknown	Original	Nasopharyngeal swab		B.1.3	GH	Illumina MiSeq	CLC Genomics Workbench 21.21
EPI_ISL_1009179	hCoV-19/USA/TN-UT-1714/2020	2020-11-12	North America / USA / Tennessee	Human		Female	66	unknown	Original	Nasopharyngeal swab		B.1.2	GH	Illumina MiSeq	CLC Genomics Workbench 21.24
EPI_ISL_1009199	hCoV-19/USA/MS-UT-1757/2020	2020-11-09	North America / USA / Mississippi	Human		Female	45	unknown	Original	Nasopharyngeal swab		B.1.265	GH	Illumina MiSeq	CLC Genomics Workbench 21.52
EPI_ISL_1010735	hCoV-19/USA/IA-UIHC-MO31/2020	2020-11-23	North America / USA / Iowa / Johnson County	Human		unknown	unknown	unknown	Original	Nasopharyngeal swab		B.1.2	GH	Nanopore MinION	ARTIC / medaka
EPI_ISL_1011534	hCoV-19/USA/MA-MGH-03933/2020	2020-11-29	North America / USA / Massachusetts	Human		unknown	unknown	unknown	Original		Longitudinal surveillance (repeat sampling)	B.1.369	GH	Illumina NovaSeq 6000	Broad viral-ngs v. v2.1.19
EPI_ISL_1014451	hCoV-19/Netherlands/GR-RIVM-21724/2020	2020-11-01	Europe / Netherlands / Groningen	Human		unknown	79	unknown	Original			B.1.177	GV	Nanopore MinION
EPI_ISL_1014453	hCoV-19/Netherlands/GR-RIVM-21701/2020	2020-11-06	Europe / Netherlands / Groningen	Human		unknown	89	unknown	Original			B.1.177	GV	Nanopore MinION
EPI_ISL_1014454	hCoV-19/Netherlands/GR-RIVM-21700/2020	2020-11-04	Europe / Netherlands / Groningen	Human		unknown	87	unknown	Original			B.1.177	GV	Nanopore MinION
EPI_ISL_1014455	hCoV-19/Netherlands/GR-RIVM-21699/2020	2020-11-04	Europe / Netherlands / Groningen	Human		unknown	89	unknown	Original			B.1.177	GV	Nanopore MinION
EPI_ISL_1014456	hCoV-19/Netherlands/GR-RIVM-21698/2020	2020-11-04	Europe / Netherlands / Groningen	Human		unknown	85	unknown	Original			B.1.177	GV	Nanopore MinION
EPI_ISL_1014458	hCoV-19/Netherlands/GR-RIVM-21692/2020	2020-11-04	Europe / Netherlands / Groningen	Human		unknown	89	unknown	Original			B.1.177	GV	Nanopore MinION
EPI_ISL_1014459	hCoV-19/Netherlands/GR-RIVM-21691/2020	2020-11-01	Europe / Netherlands / Groningen	Human		unknown	80	unknown	Original			B.1.177	GV	Nanopore MinION
EPI_ISL_1014465	hCoV-19/Netherlands/GR-RIVM-21684/2020	2020-11-06	Europe / Netherlands / Groningen	Human		unknown	96	unknown	Original			B.1.177	GV	Nanopore MinION
EPI_ISL_1014466	hCoV-19/Netherlands/GR-RIVM-21683/2020	2020-11-04	Europe / Netherlands / Groningen	Human		unknown	88	unknown	Original			B.1.177	GV	Nanopore MinION
EPI_ISL_1014467	hCoV-19/Netherlands/GR-RIVM-21682/2020	2020-11-04	Europe / Netherlands / Groningen	Human		unknown	71	unknown	Original			B.1.177	GV	Nanopore MinION
EPI_ISL_1014468	hCoV-19/Netherlands/GR-RIVM-21681/2020	2020-11-04	Europe / Netherlands / Groningen	Human		unknown	93	unknown	Original			B.1.177	GV	Nanopore MinION
EPI_ISL_1014469	hCoV-19/Netherlands/GR-RIVM-21680/2020	2020-11-02	Europe / Netherlands / Groningen	Human		unknown	81	unknown	Original			B.1.177	GV	Nanopore MinION
EPI_ISL_1014572	hCoV-19/Curacao/CW-RIVM-21710/2020	2020-11-13	South America / Curacao / Curacao	Human		unknown	6	unknown	Original			B.1.240	G	Nanopore MinION
EPI_ISL_1014573	hCoV-19/Curacao/CW-RIVM-21709/2020	2020-11-10	South America / Curacao / Curacao	Human		unknown	29	unknown	Original			B.1.240	G	Nanopore MinION
EPI_ISL_1014574	hCoV-19/Curacao/CW-RIVM-21708/2020	2020-11-07	South America / Curacao / Curacao	Human		unknown	54	unknown	Original			B.1.240	G	Nanopore MinION
EPI_ISL_1014575	hCoV-19/Curacao/CW-RIVM-21707/2020	2020-11-07	South America / Curacao / Curacao	Human		unknown	22	unknown	Original			B.1.240	G	Nanopore MinION
EPI_ISL_1014576	hCoV-19/Curacao/CW-RIVM-21706/2020	2020-11-17	South America / Curacao / Curacao	Human		unknown	22	unknown	Original			B.1.22	GH	Nanopore MinION
EPI_ISL_1014577	hCoV-19/Curacao/CW-RIVM-21705/2020	2020-11-20	South America / Curacao / Curacao	Human		unknown	51	unknown	Original			B.1.22	GH	Nanopore MinION
EPI_ISL_1015203	hCoV-19/France/IDF_PSL_578/2020	2020-11-21	Europe / France / Ile-de-France	Human		Female	47	unknown	Original	Nasopharyngeal swab		B.1	G	Illumina NextSeq
EPI_ISL_1015312	hCoV-19/France/IDF_PSL_570/2020	2020-11-04	Europe / France / Ile-de-France	Human		Male	46	unknown	Original	Nasopharyngeal swab		B.1.177	GV	Illumina NextSeq
EPI_ISL_1015313	hCoV-19/France/IDF_PSL_477/2020	2020-11-16	Europe / France / Ile-de-France	Human		Male	41	unknown	Original	Nasopharyngeal swab		B.1.160	GH	Illumina NextSeq
EPI_ISL_1015315	hCoV-19/France/IDF_PSL_486/2020	2020-11-19	Europe / France / Ile-de-France	Human		Male	34	unknown	Original	Nasopharyngeal swab		B.1.1.317	GR	Illumina NextSeq
EPI_ISL_1015317	hCoV-19/France/IDF_PSL_476/2020	2020-11-20	Europe / France / Ile-de-France	Human		Male	52	unknown	Original	Nasopharyngeal swab		B.1.160	GH	Illumina NextSeq
EPI_ISL_1015323	hCoV-19/France/IDF_PSL_600/2020	2020-11-30	Europe / France / Ile-de-France	Human		Male	49	unknown	Original	Nasopharyngeal swab		B.1.160	GH	Illumina NextSeq
EPI_ISL_1015754	hCoV-19/USA/WA-S4411/2020	2020-11-24	North America / USA / Washington / King County	Human		unknown	unknown	unknown	Original			B.1.1.208	GR	Illumina NextSeq	Seattle Flu Assembly Pipeline
EPI_ISL_1016507	hCoV-19/USA/FL-OZAR/2020	2020-11-04	North America / USA / Florida / Miami	Human		Female	44	unknown	Original	Nasopharyngeal swab		B.1.2	GH	Ion Torrent	IRMAreport
EPI_ISL_1016954	hCoV-19/USA/NE-CSSCH003/2020	2020-11-10	North America / USA / Nebraska	Human		unknown	unknown	unknown	Original	Saliva		B.1.216	G	Illumina iSeq	Swift Biosciences TAYLOR pipeline
EPI_ISL_1016955	hCoV-19/USA/NE-CSSCH016/2020	2020-11-19	North America / USA / Nebraska	Human		unknown	unknown	unknown	Original	Saliva		B.1.216	G	Illumina iSeq	Swift Biosciences TAYLOR pipeline
EPI_ISL_1016956	hCoV-19/USA/NE-CSSCH017/2020	2020-11-19	North America / USA / Nebraska	Human		unknown	unknown	unknown	Original	Saliva		B.1.189	G	Illumina iSeq	Swift Biosciences TAYLOR pipeline
EPI_ISL_1016962	hCoV-19/USA/NE-CSSCH031/2020	2020-11-30	North America / USA / Nebraska	Human		unknown	unknown	unknown	Original	Saliva		B.1.2	GH	Nanopore GridION	ARTIC pipeline
EPI_ISL_1017053	hCoV-19/USA/OR-PROV-778/2020	2020-11-24	North America / USA / Oregon	Human		Female	unknown	unknown	Original			B.1	G	Illumina iSeq 100	BWA mem, Freebayes, vcffilter, bcftools consensus (AF >=50%, min DP > 100)	Gap of 9 nucleotides when compared to the reference sequence.	info
EPI_ISL_1017066	hCoV-19/USA/AK-PROV-670/2020	2020-11-04	North America / USA / Alaska	Human		unknown	unknown	unknown	Original			B.1.2	GH	Illumina NovaSeq 6000	BWA mem, Freebayes, vcffilter, bcftools consensus (AF >=50%, min DP > 100)	Gap of 3 nucleotides when compared to the reference sequence.	info
EPI_ISL_1017069	hCoV-19/USA/OR-PROV-587/2020	2020-11-07	North America / USA / Oregon	Human		Male	unknown	unknown	Original			B.1.369	GH	Illumina iSeq 100	BWA mem, Freebayes, vcffilter, bcftools consensus (AF >=50%, min DP > 100)	Gap of 10 nucleotides when compared to the reference sequence.	info
EPI_ISL_1017173	hCoV-19/USA/OR-PROV-779/2020	2020-11-26	North America / USA / Oregon	Human		Female	unknown	unknown	Original			B.1.509	GH	Illumina iSeq 100	BWA mem, Freebayes, vcffilter, bcftools consensus (AF >=50%, min DP > 100)
EPI_ISL_1017174	hCoV-19/USA/OR-PROV-775/2020	2020-11-18	North America / USA / Oregon	Human		Female	unknown	unknown	Original			B.1.1.186	GR	Illumina NovaSeq 6000	BWA mem, Freebayes, vcffilter, bcftools consensus (AF >=50%, min DP > 100)
EPI_ISL_1017175	hCoV-19/USA/OR-PROV-780/2020	2020-11-18	North America / USA / Oregon	Human		Female	unknown	unknown	Original			B.1.2	GH	Illumina iSeq 100	BWA mem, Freebayes, vcffilter, bcftools consensus (AF >=50%, min DP > 100)
EPI_ISL_1017176	hCoV-19/USA/OR-PROV-781/2020	2020-11-18	North America / USA / Oregon	Human		Female	unknown	unknown	Original			B.1.2	GH	Illumina iSeq 100	BWA mem, Freebayes, vcffilter, bcftools consensus (AF >=50%, min DP > 100)
EPI_ISL_1017177	hCoV-19/USA/OR-PROV-739/2020	2020-11-17	North America / USA / Oregon	Human		Female	unknown	unknown	Original			B.1.2	GH	Illumina NovaSeq 6000	BWA mem, Freebayes, vcffilter, bcftools consensus (AF >=50%, min DP > 100)
EPI_ISL_1017178	hCoV-19/USA/OR-PROV-774/2020	2020-11-16	North America / USA / Oregon	Human		Male	unknown	unknown	Original			B.1.2	GH	Illumina NovaSeq 6000	BWA mem, Freebayes, vcffilter, bcftools consensus (AF >=50%, min DP > 100)
EPI_ISL_1017179	hCoV-19/USA/OR-PROV-740/2020	2020-11-13	North America / USA / Oregon	Human		unknown	unknown	unknown	Original			B.1.1.253	GR	Illumina NovaSeq 6000	BWA mem, Freebayes, vcffilter, bcftools consensus (AF >=50%, min DP > 100)
EPI_ISL_1017180	hCoV-19/USA/WA-PROV-738/2020	2020-11-11	North America / USA / Washington	Human		unknown	unknown	unknown	Original			B.1.2	GH	Illumina NovaSeq 6000	BWA mem, Freebayes, vcffilter, bcftools consensus (AF >=50%, min DP > 100)
EPI_ISL_1017181	hCoV-19/USA/OR-PROV-590/2020	2020-11-07	North America / USA / Oregon	Human		Female	unknown	unknown	Original			B.1.265	GH	Illumina iSeq 100	BWA mem, Freebayes, vcffilter, bcftools consensus (AF >=50%, min DP > 100)
EPI_ISL_1017182	hCoV-19/USA/OR-PROV-597/2020	2020-11-07	North America / USA / Oregon	Human		Female	unknown	unknown	Original			B.1.2	GH	Illumina iSeq 100	BWA mem, Freebayes, vcffilter, bcftools consensus (AF >=50%, min DP > 100)
EPI_ISL_1017183	hCoV-19/USA/OR-PROV-598/2020	2020-11-07	North America / USA / Oregon	Human		Male	unknown	unknown	Original			B.1.2	GH	Illumina iSeq 100	BWA mem, Freebayes, vcffilter, bcftools consensus (AF >=50%, min DP > 100)
EPI_ISL_1017184	hCoV-19/USA/OR-PROV-592/2020	2020-11-06	North America / USA / Oregon	Human		Female	unknown	unknown	Original			B.1	GH	Illumina iSeq 100	BWA mem, Freebayes, vcffilter, bcftools consensus (AF >=50%, min DP > 100)
EPI_ISL_1017185	hCoV-19/USA/OR-PROV-593/2020	2020-11-06	North America / USA / Oregon	Human		Female	unknown	unknown	Original			B.1.2	GH	Illumina iSeq 100	BWA mem, Freebayes, vcffilter, bcftools consensus (AF >=50%, min DP > 100)
EPI_ISL_1017186	hCoV-19/USA/OR-PROV-596/2020	2020-11-05	North America / USA / Oregon	Human		Female	unknown	unknown	Original			B.1.2	GH	Illumina iSeq 100	BWA mem, Freebayes, vcffilter, bcftools consensus (AF >=50%, min DP > 100)
EPI_ISL_1017187	hCoV-19/USA/AK-PROV-623/2020	2020-11-04	North America / USA / Alaska	Human		unknown	unknown	unknown	Original			B.1.2	GH	Illumina NovaSeq 6000	BWA mem, Freebayes, vcffilter, bcftools consensus (AF >=50%, min DP > 100)
EPI_ISL_1017188	hCoV-19/USA/AK-PROV-624/2020	2020-11-04	North America / USA / Alaska	Human		unknown	unknown	unknown	Original			B.1.336	GH	Illumina NovaSeq 6000	BWA mem, Freebayes, vcffilter, bcftools consensus (AF >=50%, min DP > 100)
EPI_ISL_1017189	hCoV-19/USA/AK-PROV-626/2020	2020-11-04	North America / USA / Alaska	Human		unknown	unknown	unknown	Original			B.1.335	GH	Illumina NovaSeq 6000	BWA mem, Freebayes, vcffilter, bcftools consensus (AF >=50%, min DP > 100)
EPI_ISL_1017190	hCoV-19/USA/AK-PROV-627/2020	2020-11-04	North America / USA / Alaska	Human		unknown	unknown	unknown	Original			B.1.2	GH	Illumina NovaSeq 6000	BWA mem, Freebayes, vcffilter, bcftools consensus (AF >=50%, min DP > 100)
EPI_ISL_1017191	hCoV-19/USA/AK-PROV-628/2020	2020-11-04	North America / USA / Alaska	Human		unknown	unknown	unknown	Original			B.1.336	GH	Illumina NovaSeq 6000	BWA mem, Freebayes, vcffilter, bcftools consensus (AF >=50%, min DP > 100)
EPI_ISL_1017192	hCoV-19/USA/AK-PROV-629/2020	2020-11-04	North America / USA / Alaska	Human		unknown	unknown	unknown	Original			B.1.2	GH	Illumina NovaSeq 6000	BWA mem, Freebayes, vcffilter, bcftools consensus (AF >=50%, min DP > 100)
EPI_ISL_1017193	hCoV-19/USA/AK-PROV-630/2020	2020-11-04	North America / USA / Alaska	Human		unknown	unknown	unknown	Original			B.1.2	GH	Illumina NovaSeq 6000	BWA mem, Freebayes, vcffilter, bcftools consensus (AF >=50%, min DP > 100)
EPI_ISL_1017194	hCoV-19/USA/AK-PROV-632/2020	2020-11-04	North America / USA / Alaska	Human		unknown	unknown	unknown	Original			B.1.2	GH	Illumina NovaSeq 6000	BWA mem, Freebayes, vcffilter, bcftools consensus (AF >=50%, min DP > 100)
EPI_ISL_1017195	hCoV-19/USA/AK-PROV-633/2020	2020-11-04	North America / USA / Alaska	Human		unknown	unknown	unknown	Original			B.1.2	GH	Illumina NovaSeq 6000	BWA mem, Freebayes, vcffilter, bcftools consensus (AF >=50%, min DP > 100)
EPI_ISL_1017196	hCoV-19/USA/AK-PROV-634/2020	2020-11-04	North America / USA / Alaska	Human		unknown	unknown	unknown	Original			B.1.335	GH	Illumina NovaSeq 6000	BWA mem, Freebayes, vcffilter, bcftools consensus (AF >=50%, min DP > 100)
EPI_ISL_1017197	hCoV-19/USA/AK-PROV-635/2020	2020-11-04	North America / USA / Alaska	Human		unknown	unknown	unknown	Original			B.1.2	GH	Illumina NovaSeq 6000	BWA mem, Freebayes, vcffilter, bcftools consensus (AF >=50%, min DP > 100)
EPI_ISL_1017198	hCoV-19/USA/AK-PROV-637/2020	2020-11-04	North America / USA / Alaska	Human		unknown	unknown	unknown	Original			B.1.2	GH	Illumina NovaSeq 6000	BWA mem, Freebayes, vcffilter, bcftools consensus (AF >=50%, min DP > 100)
EPI_ISL_1017199	hCoV-19/USA/AK-PROV-638/2020	2020-11-04	North America / USA / Alaska	Human		unknown	unknown	unknown	Original			B.1.2	GH	Illumina NovaSeq 6000	BWA mem, Freebayes, vcffilter, bcftools consensus (AF >=50%, min DP > 100)
EPI_ISL_1017200	hCoV-19/USA/AK-PROV-639/2020	2020-11-04	North America / USA / Alaska	Human		unknown	unknown	unknown	Original			B.1.336	GH	Illumina NovaSeq 6000	BWA mem, Freebayes, vcffilter, bcftools consensus (AF >=50%, min DP > 100)
EPI_ISL_1017201	hCoV-19/USA/AK-PROV-641/2020	2020-11-04	North America / USA / Alaska	Human		unknown	unknown	unknown	Original			B.1.2	GH	Illumina NovaSeq 6000	BWA mem, Freebayes, vcffilter, bcftools consensus (AF >=50%, min DP > 100)
EPI_ISL_1017202	hCoV-19/USA/AK-PROV-643/2020	2020-11-04	North America / USA / Alaska	Human		unknown	unknown	unknown	Original			B.1.2	GH	Illumina NovaSeq 6000	BWA mem, Freebayes, vcffilter, bcftools consensus (AF >=50%, min DP > 100)
EPI_ISL_1017203	hCoV-19/USA/AK-PROV-644/2020	2020-11-04	North America / USA / Alaska	Human		unknown	unknown	unknown	Original			B.1.2	GH	Illumina NovaSeq 6000	BWA mem, Freebayes, vcffilter, bcftools consensus (AF >=50%, min DP > 100)
EPI_ISL_1017204	hCoV-19/USA/AK-PROV-647/2020	2020-11-04	North America / USA / Alaska	Human		unknown	unknown	unknown	Original			B.1.336	GH	Illumina NovaSeq 6000	BWA mem, Freebayes, vcffilter, bcftools consensus (AF >=50%, min DP > 100)
EPI_ISL_1017205	hCoV-19/USA/AK-PROV-668/2020	2020-11-04	North America / USA / Alaska	Human		unknown	unknown	unknown	Original			B.1.336	GH	Illumina NovaSeq 6000	BWA mem, Freebayes, vcffilter, bcftools consensus (AF >=50%, min DP > 100)
EPI_ISL_1017206	hCoV-19/USA/AK-PROV-672/2020	2020-11-04	North America / USA / Alaska	Human		unknown	unknown	unknown	Original			B.1.336	GH	Illumina NovaSeq 6000	BWA mem, Freebayes, vcffilter, bcftools consensus (AF >=50%, min DP > 100)
EPI_ISL_1017207	hCoV-19/USA/AK-PROV-674/2020	2020-11-04	North America / USA / Alaska	Human		unknown	unknown	unknown	Original			B.1.336	GH	Illumina NovaSeq 6000	BWA mem, Freebayes, vcffilter, bcftools consensus (AF >=50%, min DP > 100)
EPI_ISL_1017208	hCoV-19/USA/AK-PROV-677/2020	2020-11-04	North America / USA / Alaska	Human		unknown	unknown	unknown	Original			B.1.336	GH	Illumina NovaSeq 6000	BWA mem, Freebayes, vcffilter, bcftools consensus (AF >=50%, min DP > 100)
EPI_ISL_1017209	hCoV-19/USA/AK-PROV-678/2020	2020-11-04	North America / USA / Alaska	Human		unknown	unknown	unknown	Original			B.1.336	GH	Illumina NovaSeq 6000	BWA mem, Freebayes, vcffilter, bcftools consensus (AF >=50%, min DP > 100)
EPI_ISL_1017210	hCoV-19/USA/AK-PROV-682/2020	2020-11-04	North America / USA / Alaska	Human		unknown	unknown	unknown	Original			B.1.2	GH	Illumina NovaSeq 6000	BWA mem, Freebayes, vcffilter, bcftools consensus (AF >=50%, min DP > 100)
EPI_ISL_1017211	hCoV-19/USA/AK-PROV-690/2020	2020-11-04	North America / USA / Alaska	Human		unknown	unknown	unknown	Original			B.1.336	GH	Illumina NovaSeq 6000	BWA mem, Freebayes, vcffilter, bcftools consensus (AF >=50%, min DP > 100)
EPI_ISL_1017212	hCoV-19/USA/AK-PROV-696/2020	2020-11-04	North America / USA / Alaska	Human		unknown	unknown	unknown	Original			B.1.336	GH	Illumina NovaSeq 6000	BWA mem, Freebayes, vcffilter, bcftools consensus (AF >=50%, min DP > 100)
EPI_ISL_1017213	hCoV-19/USA/AK-PROV-703/2020	2020-11-04	North America / USA / Alaska	Human		unknown	unknown	unknown	Original			B.1.2	GH	Illumina NovaSeq 6000	BWA mem, Freebayes, vcffilter, bcftools consensus (AF >=50%, min DP > 100)
EPI_ISL_1017214	hCoV-19/USA/AK-PROV-704/2020	2020-11-04	North America / USA / Alaska	Human		unknown	unknown	unknown	Original			B.1.336	GH	Illumina NovaSeq 6000	BWA mem, Freebayes, vcffilter, bcftools consensus (AF >=50%, min DP > 100)
EPI_ISL_1017215	hCoV-19/USA/AK-PROV-706/2020	2020-11-04	North America / USA / Alaska	Human		unknown	unknown	unknown	Original			B.1.336	GH	Illumina NovaSeq 6000	BWA mem, Freebayes, vcffilter, bcftools consensus (AF >=50%, min DP > 100)
EPI_ISL_1018099	hCoV-19/Ghana/NMIMR-NTRA-8993/2020	2020-11-06	Africa / Ghana	Human		unknown	unknown	unknown	Original	Nasopharyngeal and oropharyngeal		B.1.1.31	GR	Illumina	Bwa v. 0.7.17-r1188
EPI_ISL_1018100	hCoV-19/Ghana/NMIMR-NTRA-9791/2020	2020-11-13	Africa / Ghana	Human		unknown	unknown	unknown	Original	Nasopharyngeal and oropharyngeal		B.1.1.70	GR	Illumina	Bwa v. 0.7.17-r1188
EPI_ISL_1018101	hCoV-19/Ghana/NMIMR-NTRA-9793/2020	2020-11-13	Africa / Ghana	Human		unknown	unknown	unknown	Original	Nasopharyngeal and oropharyngeal		B.1.1.29	GR	Illumina	Bwa v. 0.7.17-r1188	Gap of 5 nucleotides when compared to the reference sequence.	info
EPI_ISL_1019655	hCoV-19/Hong Kong/HKPU-05334/2020	2020-11-02	Asia / Hong Kong	Human		Male	27	Discharged	Original			B.1.1.29	GR	Nanopore MinION	ARTIC-nCoV-bioinformaticsSOP-v1.1.0
EPI_ISL_1019699	hCoV-19/Hong Kong/HKPU-05385/2020	2020-11-10	Asia / Hong Kong	Human		Male	48	Discharged	Original			B.1.1	GR	Nanopore MinION	ARTIC-nCoV-bioinformaticsSOP-v1.1.0
EPI_ISL_1019705	hCoV-19/Hong Kong/HKPU-05387/2020	2020-11-10	Asia / Hong Kong	Human		Male	53	Discharged	Original			B.1.160	GH	Nanopore MinION	ARTIC-nCoV-bioinformaticsSOP-v1.1.0
EPI_ISL_1019726	hCoV-19/Hong Kong/HKPU-05409/2020	2020-11-12	Asia / Hong Kong	Human		Male	77	Critical	Original			B.1.36.27	GH	Nanopore MinION	ARTIC-nCoV-bioinformaticsSOP-v1.1.0
EPI_ISL_1019737	hCoV-19/Hong Kong/HKPU-05425/2020	2020-11-12	Asia / Hong Kong	Human		Male	49	Discharged	Original			B.1.2	GH	Nanopore MinION	ARTIC-nCoV-bioinformaticsSOP-v1.1.0
EPI_ISL_1019742	hCoV-19/Hong Kong/HKPU-05427/2020	2020-11-12	Asia / Hong Kong	Human		Male	42	Discharged	Original			B.1.36.27	GH	Nanopore MinION	ARTIC-nCoV-bioinformaticsSOP-v1.1.0
EPI_ISL_1019750	hCoV-19/Hong Kong/HKPU-05444/2020	2020-11-14	Asia / Hong Kong	Human		Female	48	Discharged	Original			B.1.36.27	GH	Nanopore MinION	ARTIC-nCoV-bioinformaticsSOP-v1.1.0
EPI_ISL_1019778	hCoV-19/Hong Kong/HKPU-05482/2020	2020-11-19	Asia / Hong Kong	Human		Male	47	Discharged	Original			B.1.2	GH	Nanopore MinION	ARTIC-nCoV-bioinformaticsSOP-v1.1.0
EPI_ISL_1019783	hCoV-19/Hong Kong/HKPU-05494/2020	2020-11-20	Asia / Hong Kong	Human		Male	37	Discharged	Original			B.1.258.3	G	Nanopore MinION	ARTIC-nCoV-bioinformaticsSOP-v1.1.0
EPI_ISL_1019813	hCoV-19/Hong Kong/HKPU-05541/2020	2020-11-21	Asia / Hong Kong	Human		Female	59	Discharged	Original			B.1.36.27	GH	Nanopore MinION	ARTIC-nCoV-bioinformaticsSOP-v1.1.0
EPI_ISL_1019846	hCoV-19/Hong Kong/HKPU-05634/2020	2020-11-23	Asia / Hong Kong	Human		Female	64	Discharged	Original			B.1.36.27	GH	Nanopore MinION	ARTIC-nCoV-bioinformaticsSOP-v1.1.0
EPI_ISL_1019853	hCoV-19/Hong Kong/HKPU-05664/2020	2020-11-23	Asia / Hong Kong	Human		Female	83	Discharged	Original			B.1.36.27	GH	Nanopore MinION	ARTIC-nCoV-bioinformaticsSOP-v1.1.0
EPI_ISL_1019855	hCoV-19/Hong Kong/HKPU-05666/2020	2020-11-23	Asia / Hong Kong	Human		Male	34	Discharged	Original			B.1.36.27	GH	Nanopore MinION	ARTIC-nCoV-bioinformaticsSOP-v1.1.0
EPI_ISL_1019858	hCoV-19/Hong Kong/HKPU-05680/2020	2020-11-23	Asia / Hong Kong	Human		Female	60	Discharged	Original			B.1.36.27	GH	Nanopore MinION	ARTIC-nCoV-bioinformaticsSOP-v1.1.0
EPI_ISL_1019863	hCoV-19/Hong Kong/HKPU-05682/2020	2020-11-23	Asia / Hong Kong	Human		Female	66	Discharged	Original			B.1.36.27	GH	Nanopore MinION	ARTIC-nCoV-bioinformaticsSOP-v1.1.0
EPI_ISL_1019872	hCoV-19/Hong Kong/HKPU-05713/2020	2020-11-24	Asia / Hong Kong	Human		Female	85	Discharged	Original			B.1.36.27	GH	Nanopore MinION	ARTIC-nCoV-bioinformaticsSOP-v1.1.0
EPI_ISL_1019875	hCoV-19/Hong Kong/HKPU-05719/2020	2020-11-24	Asia / Hong Kong	Human		Female	31	Discharged	Original			B.1.36.27	GH	Nanopore MinION	ARTIC-nCoV-bioinformaticsSOP-v1.1.0
EPI_ISL_1019877	hCoV-19/Hong Kong/HKPU-05720/2020	2020-11-24	Asia / Hong Kong	Human		Female	38	Discharged	Original			B.1.36.27	GH	Nanopore MinION	ARTIC-nCoV-bioinformaticsSOP-v1.1.0
EPI_ISL_1019880	hCoV-19/Hong Kong/HKPU-05728/2020	2020-11-24	Asia / Hong Kong	Human		Male	70	Discharged	Original			B.1.36.27	GH	Nanopore MinION	ARTIC-nCoV-bioinformaticsSOP-v1.1.0
EPI_ISL_1019882	hCoV-19/Hong Kong/HKPU-05733/2020	2020-11-24	Asia / Hong Kong	Human		Female	70	Discharged	Original			B.1.36.27	GH	Nanopore MinION	ARTIC-nCoV-bioinformaticsSOP-v1.1.0
EPI_ISL_1019888	hCoV-19/Hong Kong/HKPU-05759/2020	2020-11-24	Asia / Hong Kong	Human		Male	21	Discharged	Original			B.1.36.27	GH	Nanopore MinION	ARTIC-nCoV-bioinformaticsSOP-v1.1.0
EPI_ISL_1019893	hCoV-19/Hong Kong/HKPU-05783/2020	2020-11-25	Asia / Hong Kong	Human		Female	71	Discharged	Original			B.1.36.27	GH	Nanopore MinION	ARTIC-nCoV-bioinformaticsSOP-v1.1.0
EPI_ISL_1020022	hCoV-19/Hong Kong/HKPU-05789/2020	2020-11-25	Asia / Hong Kong	Human		Male	51	Discharged	Original			B.1.36.27	GH	Nanopore MinION	ARTIC-nCoV-bioinformaticsSOP-v1.1.0
EPI_ISL_1020025	hCoV-19/Hong Kong/HKPU-05803/2020	2020-11-25	Asia / Hong Kong	Human		Male	15	Discharged	Original			B.1.36.27	GH	Nanopore MinION	ARTIC-nCoV-bioinformaticsSOP-v1.1.0
EPI_ISL_1020027	hCoV-19/Hong Kong/HKPU-05838/2020	2020-11-25	Asia / Hong Kong	Human		Female	73	Stable	Original			B.1.36.27	GH	Nanopore MinION	ARTIC-nCoV-bioinformaticsSOP-v1.1.0
EPI_ISL_1020028	hCoV-19/Hong Kong/HKPU-05852/2020	2020-11-25	Asia / Hong Kong	Human		Female	60	Discharged	Original			B.1.36.27	GH	Nanopore MinION	ARTIC-nCoV-bioinformaticsSOP-v1.1.0
EPI_ISL_1020029	hCoV-19/Hong Kong/HKPU-05856/2020	2020-11-25	Asia / Hong Kong	Human		Female	69	Discharged	Original			B.1.36.27	GH	Nanopore MinION	ARTIC-nCoV-bioinformaticsSOP-v1.1.0
EPI_ISL_1020030	hCoV-19/Hong Kong/HKPU-05857/2020	2020-11-25	Asia / Hong Kong	Human		Male	65	Discharged	Original			B.1.36.27	GH	Nanopore MinION	ARTIC-nCoV-bioinformaticsSOP-v1.1.0
EPI_ISL_1020031	hCoV-19/Hong Kong/HKPU-05865/2020	2020-11-25	Asia / Hong Kong	Human		Male	29	Discharged	Original			B.1.36.27	GH	Nanopore MinION	ARTIC-nCoV-bioinformaticsSOP-v1.1.0
EPI_ISL_1020032	hCoV-19/Hong Kong/HKPU-05873/2020	2020-11-26	Asia / Hong Kong	Human		Female	57	Discharged	Original			B.1.36.27	GH	Nanopore MinION	ARTIC-nCoV-bioinformaticsSOP-v1.1.0
EPI_ISL_1020034	hCoV-19/Hong Kong/HKPU-05893/2020	2020-11-26	Asia / Hong Kong	Human		Female	36	Discharged	Original			B.1.36.27	GH	Nanopore MinION	ARTIC-nCoV-bioinformaticsSOP-v1.1.0
EPI_ISL_1020036	hCoV-19/Hong Kong/HKPU-05903/2020	2020-11-26	Asia / Hong Kong	Human		Female	34	Discharged	Original			B.1.36.27	GH	Nanopore MinION	ARTIC-nCoV-bioinformaticsSOP-v1.1.0
EPI_ISL_1020037	hCoV-19/Hong Kong/HKPU-05907/2020	2020-11-26	Asia / Hong Kong	Human		Male	58	Discharged	Original			B.1.36.27	GH	Nanopore MinION	ARTIC-nCoV-bioinformaticsSOP-v1.1.0
EPI_ISL_1020041	hCoV-19/Hong Kong/HKPU-05984/2020	2020-11-27	Asia / Hong Kong	Human		Female	75	Discharged	Original			B.1.36.27	GH	Nanopore MinION	ARTIC-nCoV-bioinformaticsSOP-v1.1.0
EPI_ISL_1020043	hCoV-19/Hong Kong/HKPU-05989/2020	2020-11-27	Asia / Hong Kong	Human		Male	62	Discharged	Original			B.1.36.27	GH	Nanopore MinION	ARTIC-nCoV-bioinformaticsSOP-v1.1.0
EPI_ISL_1020045	hCoV-19/Hong Kong/HKPU-06024/2020	2020-11-27	Asia / Hong Kong	Human		Female	61	Discharged	Original			B.1.36.27	GH	Nanopore MinION	ARTIC-nCoV-bioinformaticsSOP-v1.1.0
EPI_ISL_1020046	hCoV-19/Hong Kong/HKPU-06049/2020	2020-11-28	Asia / Hong Kong	Human		Male	63	Discharged	Original			B.1.36.27	GH	Nanopore MinION	ARTIC-nCoV-bioinformaticsSOP-v1.1.0
EPI_ISL_1020049	hCoV-19/Hong Kong/HKPU-06159/2020	2020-11-29	Asia / Hong Kong	Human		Male	69	Discharged	Original			B.1.36.27	GH	Nanopore MinION	ARTIC-nCoV-bioinformaticsSOP-v1.1.0
EPI_ISL_1020050	hCoV-19/Hong Kong/HKPU-06168/2020	2020-11-29	Asia / Hong Kong	Human		Male	42	Discharged	Original			B.1.36.27	GH	Nanopore MinION	ARTIC-nCoV-bioinformaticsSOP-v1.1.0
EPI_ISL_1020051	hCoV-19/Hong Kong/HKPU-06177/2020	2020-11-29	Asia / Hong Kong	Human		Female	68	Discharged	Original			B.1.36.27	GH	Nanopore MinION	ARTIC-nCoV-bioinformaticsSOP-v1.1.0
EPI_ISL_1020053	hCoV-19/Hong Kong/HKPU-06216/2020	2020-11-29	Asia / Hong Kong	Human		Male	51	Discharged	Original			B.1.36.27	GH	Nanopore MinION	ARTIC-nCoV-bioinformaticsSOP-v1.1.0
EPI_ISL_1020054	hCoV-19/Hong Kong/HKPU-06217/2020	2020-11-29	Asia / Hong Kong	Human		Female	51	Discharged	Original			B.1.36.27	GH	Nanopore MinION	ARTIC-nCoV-bioinformaticsSOP-v1.1.0
EPI_ISL_1020055	hCoV-19/Hong Kong/HKPU-06226/2020	2020-11-29	Asia / Hong Kong	Human		Female	53	Discharged	Original			B.1.36.27	GH	Nanopore MinION	ARTIC-nCoV-bioinformaticsSOP-v1.1.0
EPI_ISL_1020059	hCoV-19/Hong Kong/HKPU-06255/2020	2020-11-30	Asia / Hong Kong	Human		Female	79	Deceased	Original			B.1.36.27	GH	Nanopore MinION	ARTIC-nCoV-bioinformaticsSOP-v1.1.0
EPI_ISL_1020062	hCoV-19/Hong Kong/HKPU-06289/2020	2020-11-30	Asia / Hong Kong	Human		Male	57	Discharged	Original			B.1.36.27	GH	Nanopore MinION	ARTIC-nCoV-bioinformaticsSOP-v1.1.0
EPI_ISL_1020063	hCoV-19/Hong Kong/HKPU-06311/2020	2020-11-30	Asia / Hong Kong	Human		Male	69	Discharged	Original			B.1.36.27	GH	Nanopore MinION	ARTIC-nCoV-bioinformaticsSOP-v1.1.0
EPI_ISL_1020196	hCoV-19/Indonesia/BGR-LIPI040/2020	2020-11-09	Asia / Indonesia / Jawa Barat / Bogor	Human		Female	40	unknown	Original	Nasopharyngeal and oropharyngeal swab		B.1.468	GH	Nanopore MinION
EPI_ISL_1020287	hCoV-19/Belgium/AZKLINA120-159847/2020	2020-11-13	Europe / Belgium / Antwerp	Human	ZIP Code 2328	Female	25	Outpatient	Original			B.1.160	GH	Illumina MiSeq	CLC Genomics Workbench
EPI_ISL_1020289	hCoV-19/Belgium/AZKLINA120-164416/2020	2020-11-19	Europe / Belgium / Antwerp	Human	ZIP Code 2920	Female	37	Outpatient	Original			B.1.160	GH	Illumina MiSeq	CLC Genomics Workbench
EPI_ISL_1020290	hCoV-19/Belgium/AZKLINA120-164738/2020	2020-11-20	Europe / Belgium / Antwerp	Human	ZIP Code 2180	Female	70	Hospitalized	Original			B.1.160	GH	Illumina MiSeq	CLC Genomics Workbench
EPI_ISL_1020293	hCoV-19/Belgium/AZKLINA120-168913/2020	2020-11-26	Europe / Belgium / Antwerp	Human	ZIP Code 2110	Male	64	Hospitalized	Original			B.1.160	GH	Illumina MiSeq	CLC Genomics Workbench
EPI_ISL_1025908	hCoV-19/Denmark/DCGC-45530/2020	2020-11-30	Europe / Denmark / Hovedstaden	Human		unknown	unknown	unknown	Original			B.1.177.21	GV	Oxford Nanopore	ARTIC-ncov2019 v1.1.0
EPI_ISL_1025909	hCoV-19/Denmark/DCGC-45531/2020	2020-11-30	Europe / Denmark / Hovedstaden	Human		unknown	unknown	unknown	Original			B.1.177.21	GV	Oxford Nanopore	ARTIC-ncov2019 v1.1.0
EPI_ISL_1025911	hCoV-19/Denmark/DCGC-45533/2020	2020-11-30	Europe / Denmark / Hovedstaden	Human		unknown	unknown	unknown	Original			B.1.177.21	GV	Oxford Nanopore	ARTIC-ncov2019 v1.1.0
EPI_ISL_1025914	hCoV-19/Denmark/DCGC-45536/2020	2020-11-23	Europe / Denmark / Midtjylland	Human		unknown	unknown	unknown	Original			B.1.258.8	G	Oxford Nanopore	ARTIC-ncov2019 v1.1.0	Gap of 6 nucleotides when compared to the reference sequence.	info
EPI_ISL_1025915	hCoV-19/Denmark/DCGC-45537/2020	2020-11-23	Europe / Denmark / Midtjylland	Human		unknown	unknown	unknown	Original			B.1.177.12	GV	Oxford Nanopore	ARTIC-ncov2019 v1.1.0
EPI_ISL_1025916	hCoV-19/Denmark/DCGC-45538/2020	2020-11-23	Europe / Denmark / Midtjylland	Human		unknown	unknown	unknown	Original			B.1.177.12	GV	Oxford Nanopore	ARTIC-ncov2019 v1.1.0
EPI_ISL_1025919	hCoV-19/Denmark/DCGC-45541/2020	2020-11-23	Europe / Denmark / Midtjylland	Human		unknown	unknown	unknown	Original			B.1.177.12	GV	Oxford Nanopore	ARTIC-ncov2019 v1.1.0
EPI_ISL_1025920	hCoV-19/Denmark/DCGC-45542/2020	2020-11-23	Europe / Denmark / Midtjylland	Human		unknown	unknown	unknown	Original			B.1.177.12	GV	Oxford Nanopore	ARTIC-ncov2019 v1.1.0
EPI_ISL_1025921	hCoV-19/Denmark/DCGC-45543/2020	2020-11-23	Europe / Denmark / Midtjylland	Human		unknown	unknown	unknown	Original			B.1.177.12	GV	Oxford Nanopore	ARTIC-ncov2019 v1.1.0
EPI_ISL_1025922	hCoV-19/Denmark/DCGC-45544/2020	2020-11-23	Europe / Denmark / Midtjylland	Human		unknown	unknown	unknown	Original			B.1.1.298	GR	Oxford Nanopore	ARTIC-ncov2019 v1.1.0	Gap of 13 nucleotides when compared to the reference sequence.	info
EPI_ISL_1025923	hCoV-19/Denmark/DCGC-45545/2020	2020-11-23	Europe / Denmark / Midtjylland	Human		unknown	unknown	unknown	Original			B.1.177.12	GV	Oxford Nanopore	ARTIC-ncov2019 v1.1.0
EPI_ISL_1025925	hCoV-19/Denmark/DCGC-45547/2020	2020-11-23	Europe / Denmark / Midtjylland	Human		unknown	unknown	unknown	Original			B.1.177.12	GV	Oxford Nanopore	ARTIC-ncov2019 v1.1.0
EPI_ISL_1025927	hCoV-19/Denmark/DCGC-45549/2020	2020-11-23	Europe / Denmark / Midtjylland	Human		unknown	unknown	unknown	Original			B.1.177.12	GV	Oxford Nanopore	ARTIC-ncov2019 v1.1.0
EPI_ISL_1025929	hCoV-19/Denmark/DCGC-45551/2020	2020-11-23	Europe / Denmark / Midtjylland	Human		unknown	unknown	unknown	Original			B.1.177.12	GV	Oxford Nanopore	ARTIC-ncov2019 v1.1.0
EPI_ISL_1025930	hCoV-19/Denmark/DCGC-45552/2020	2020-11-23	Europe / Denmark / Midtjylland	Human		unknown	unknown	unknown	Original			B.1.177.12	GV	Oxford Nanopore	ARTIC-ncov2019 v1.1.0
EPI_ISL_1025931	hCoV-19/Denmark/DCGC-45553/2020	2020-11-23	Europe / Denmark / Midtjylland	Human		unknown	unknown	unknown	Original			B.1.258.8	G	Oxford Nanopore	ARTIC-ncov2019 v1.1.0	Gap of 6 nucleotides when compared to the reference sequence.	info
EPI_ISL_1025932	hCoV-19/Denmark/DCGC-45554/2020	2020-11-23	Europe / Denmark / Midtjylland	Human		unknown	unknown	unknown	Original			B.1.1.298	GR	Oxford Nanopore	ARTIC-ncov2019 v1.1.0	Gap of 13 nucleotides when compared to the reference sequence.	info
EPI_ISL_1025936	hCoV-19/Denmark/DCGC-45558/2020	2020-11-23	Europe / Denmark / Midtjylland	Human		unknown	unknown	unknown	Original			B.1.221.3	G	Oxford Nanopore	ARTIC-ncov2019 v1.1.0
EPI_ISL_1025938	hCoV-19/Denmark/DCGC-45560/2020	2020-11-23	Europe / Denmark / Midtjylland	Human		unknown	unknown	unknown	Original			B.1.1.70	GR	Oxford Nanopore	ARTIC-ncov2019 v1.1.0
EPI_ISL_1025939	hCoV-19/Denmark/DCGC-45561/2020	2020-11-23	Europe / Denmark / Midtjylland	Human		unknown	unknown	unknown	Original			B.1.177.12	GV	Oxford Nanopore	ARTIC-ncov2019 v1.1.0
EPI_ISL_1025941	hCoV-19/Denmark/DCGC-45563/2020	2020-11-23	Europe / Denmark / Midtjylland	Human		unknown	unknown	unknown	Original			B.1.177.21	GV	Oxford Nanopore	ARTIC-ncov2019 v1.1.0
EPI_ISL_1025942	hCoV-19/Denmark/DCGC-45564/2020	2020-11-23	Europe / Denmark / Midtjylland	Human		unknown	unknown	unknown	Original			B.1.1.298	GR	Oxford Nanopore	ARTIC-ncov2019 v1.1.0	NS7a_Q62stop results in 49.6% truncation of the protein sequence. Gap of 13 nucleotides when compared to the reference sequence.	info
EPI_ISL_1025943	hCoV-19/Denmark/DCGC-45565/2020	2020-11-23	Europe / Denmark / Midtjylland	Human		unknown	unknown	unknown	Original			B.1.398	G	Oxford Nanopore	ARTIC-ncov2019 v1.1.0
EPI_ISL_1025944	hCoV-19/Denmark/DCGC-45566/2020	2020-11-23	Europe / Denmark	Human		unknown	unknown	unknown	Original			B.1.2	GH	Oxford Nanopore	ARTIC-ncov2019 v1.1.0
EPI_ISL_1025945	hCoV-19/Denmark/DCGC-45567/2020	2020-11-23	Europe / Denmark / Midtjylland	Human		unknown	unknown	unknown	Original			B.1.1.219	GR	Oxford Nanopore	ARTIC-ncov2019 v1.1.0
EPI_ISL_1025947	hCoV-19/Denmark/DCGC-45569/2020	2020-11-23	Europe / Denmark / Midtjylland	Human		unknown	unknown	unknown	Original			B.1.177.12	GV	Oxford Nanopore	ARTIC-ncov2019 v1.1.0
EPI_ISL_1025948	hCoV-19/Denmark/DCGC-45570/2020	2020-11-23	Europe / Denmark / Midtjylland	Human		unknown	unknown	unknown	Original			B.1.177.12	GV	Oxford Nanopore	ARTIC-ncov2019 v1.1.0
EPI_ISL_1025950	hCoV-19/Denmark/DCGC-45572/2020	2020-11-23	Europe / Denmark / Midtjylland	Human		unknown	unknown	unknown	Original			B.1.177.12	GV	Oxford Nanopore	ARTIC-ncov2019 v1.1.0
EPI_ISL_1025951	hCoV-19/Denmark/DCGC-45573/2020	2020-11-23	Europe / Denmark / Midtjylland	Human		unknown	unknown	unknown	Original			B.1.177.12	GV	Oxford Nanopore	ARTIC-ncov2019 v1.1.0
EPI_ISL_1025952	hCoV-19/Denmark/DCGC-45574/2020	2020-11-23	Europe / Denmark / Midtjylland	Human		unknown	unknown	unknown	Original			B.1.177.12	GV	Oxford Nanopore	ARTIC-ncov2019 v1.1.0
EPI_ISL_1025953	hCoV-19/Denmark/DCGC-45575/2020	2020-11-23	Europe / Denmark / Midtjylland	Human		unknown	unknown	unknown	Original			B.1.221.3	G	Oxford Nanopore	ARTIC-ncov2019 v1.1.0
EPI_ISL_1025954	hCoV-19/Denmark/DCGC-45576/2020	2020-11-23	Europe / Denmark / Midtjylland	Human		unknown	unknown	unknown	Original			B.1.177.12	GV	Oxford Nanopore	ARTIC-ncov2019 v1.1.0
EPI_ISL_1025955	hCoV-19/Denmark/DCGC-45577/2020	2020-11-16	Europe / Denmark / Midtjylland	Human		unknown	unknown	unknown	Original			B.1.258.8	G	Oxford Nanopore	ARTIC-ncov2019 v1.1.0	Gap of 6 nucleotides when compared to the reference sequence.	info
EPI_ISL_1025956	hCoV-19/Denmark/DCGC-45578/2020	2020-11-16	Europe / Denmark / Midtjylland	Human		unknown	unknown	unknown	Original			B.1.1	GR	Oxford Nanopore	ARTIC-ncov2019 v1.1.0
EPI_ISL_1025957	hCoV-19/Denmark/DCGC-45579/2020	2020-11-09	Europe / Denmark / Hovedstaden	Human		unknown	unknown	unknown	Original			B.1.177	GV	Oxford Nanopore	ARTIC-ncov2019 v1.1.0
EPI_ISL_1025959	hCoV-19/Denmark/DCGC-45581/2020	2020-11-09	Europe / Denmark / Hovedstaden	Human		unknown	unknown	unknown	Original			B.1.160	GH	Oxford Nanopore	ARTIC-ncov2019 v1.1.0
EPI_ISL_1025960	hCoV-19/Denmark/DCGC-45582/2020	2020-11-09	Europe / Denmark / Sjaelland	Human		unknown	unknown	unknown	Original			B.1.177.21	GV	Oxford Nanopore	ARTIC-ncov2019 v1.1.0
EPI_ISL_1027472	hCoV-19/USA/CA-CZB-23037/2020	2020-11-30	North America / USA / California / Alameda County	Human		unknown	unknown	unknown	Original	Nasopharyngeal and oropharyngeal swab		B.1.243	G	Illumina Novaseq	minimap2 / iVar
EPI_ISL_1027535	hCoV-19/USA/CA-CZB-17320/2020	2020-11-25	North America / USA / California / Humboldt County	Human		unknown	unknown	unknown	Original	Nasopharyngeal and oropharyngeal swab		B.1.311	GH	Illumina Novaseq	minimap2 / iVar
EPI_ISL_1027539	hCoV-19/USA/CA-CZB-17388/2020	2020-11-30	North America / USA / California / Humboldt County	Human		unknown	unknown	unknown	Original	Nasopharyngeal and oropharyngeal swab		B.1.311	GH	Illumina Novaseq	minimap2 / iVar
EPI_ISL_1032931	hCoV-19/USA/IL-IDPH-MCH-I-0001073/2020	2020-11-02	North America / USA / Illinois / McHenry County	Human		unknown	unknown	unknown	Original			B.1.2	GH	Nanopore MinION	Medaka
EPI_ISL_1032932	hCoV-19/USA/IL-IDPH-MCH-I-0001074/2020	2020-11-02	North America / USA / Illinois / McHenry County	Human		unknown	unknown	unknown	Original			B.1.2	GH	Nanopore MinION	Medaka
EPI_ISL_1034612	hCoV-19/Hong Kong/HKU-201216-306/2020	2020-11-20	Asia / China / Hong Kong	Human		unknown	unknown	unknown	Original	Nasopharyngeal swab		B.1.36.27	GH	Nanopore MinION
EPI_ISL_1034613	hCoV-19/Hong Kong/HKU-201216-307/2020	2020-11-21	Asia / China / Hong Kong	Human		unknown	unknown	unknown	Original	Nasopharyngeal swab		B.1.36.27	GH	Nanopore MinION
EPI_ISL_1034614	hCoV-19/Hong Kong/HKU-201216-308/2020	2020-11-21	Asia / China / Hong Kong	Human		unknown	unknown	unknown	Original	Nasopharyngeal swab		B.1.36.27	GH	Nanopore MinION
EPI_ISL_1034621	hCoV-19/Hong Kong/HKU-201216-337/2020	2020-11-26	Asia / China / Hong Kong	Human		unknown	unknown	unknown	Original	Nasopharyngeal swab		B.1.36.27	GH	Nanopore MinION
EPI_ISL_1034622	hCoV-19/Hong Kong/HKU-201216-341/2020	2020-11-24	Asia / China / Hong Kong	Human		unknown	unknown	unknown	Original	Nasopharyngeal swab		B.1.36.27	GH	Nanopore MinION
EPI_ISL_1034623	hCoV-19/Hong Kong/HKU-201216-342/2020	2020-11-24	Asia / China / Hong Kong	Human		unknown	unknown	unknown	Original	Nasopharyngeal swab		B.1.36.27	GH	Nanopore MinION
EPI_ISL_1034624	hCoV-19/Hong Kong/HKU-201216-344/2020	2020-11-25	Asia / China / Hong Kong	Human		unknown	unknown	unknown	Original	Nasopharyngeal swab		B.1.36.27	GH	Nanopore MinION
EPI_ISL_1034625	hCoV-19/Hong Kong/HKU-201216-345/2020	2020-11-25	Asia / China / Hong Kong	Human		unknown	unknown	unknown	Original	Nasopharyngeal swab		B.1.36.27	GH	Nanopore MinION
EPI_ISL_1034626	hCoV-19/Hong Kong/HKU-201216-348/2020	2020-11-26	Asia / China / Hong Kong	Human		unknown	unknown	unknown	Original	Nasopharyngeal swab		B.1.36.27	GH	Nanopore MinION
EPI_ISL_1034627	hCoV-19/Hong Kong/HKU-201216-349/2020	2020-11-26	Asia / China / Hong Kong	Human		unknown	unknown	unknown	Original	Nasopharyngeal swab		B.1.36.27	GH	Nanopore MinION
EPI_ISL_1034628	hCoV-19/Hong Kong/HKU-201216-351/2020	2020-11-27	Asia / China / Hong Kong	Human		unknown	unknown	unknown	Original	Nasopharyngeal swab		B.1.36.27	GH	Nanopore MinION
EPI_ISL_1034629	hCoV-19/Hong Kong/HKU-201216-352/2020	2020-11-27	Asia / China / Hong Kong	Human		unknown	unknown	unknown	Original	Nasopharyngeal swab		B.1.36.27	GH	Nanopore MinION
EPI_ISL_1034630	hCoV-19/Hong Kong/HKU-201216-353/2020	2020-11-27	Asia / China / Hong Kong	Human		unknown	unknown	unknown	Original	Nasopharyngeal swab		B.1.36.27	GH	Nanopore MinION
EPI_ISL_1034631	hCoV-19/Hong Kong/HKU-201216-355/2020	2020-11-28	Asia / China / Hong Kong	Human		unknown	unknown	unknown	Original	Nasopharyngeal swab		B.1.36.27	GH	Nanopore MinION
EPI_ISL_1034632	hCoV-19/Hong Kong/HKU-201216-356/2020	2020-11-28	Asia / China / Hong Kong	Human		unknown	unknown	unknown	Original	Nasopharyngeal swab		B.1.36.27	GH	Nanopore MinION
EPI_ISL_1034633	hCoV-19/Hong Kong/HKU-201216-362/2020	2020-11-28	Asia / China / Hong Kong	Human		unknown	unknown	unknown	Original	Nasopharyngeal swab		B.1.36.27	GH	Nanopore MinION
EPI_ISL_1034635	hCoV-19/Hong Kong/HKU-201216-368/2020	2020-11-29	Asia / China / Hong Kong	Human		unknown	unknown	unknown	Original	Nasopharyngeal swab		B.1.36.27	GH	Nanopore MinION
EPI_ISL_1034636	hCoV-19/Hong Kong/HKU-201216-369/2020	2020-11-29	Asia / China / Hong Kong	Human		unknown	unknown	unknown	Original	Nasopharyngeal swab		B.1.36.27	GH	Nanopore MinION
EPI_ISL_1034666	hCoV-19/Hong Kong/HKU-201216-301/2020	2020-11-17	Asia / China / Hong Kong	Human		unknown	unknown	unknown	Original	Saliva		B.1.177.15	GV	Nanopore MinION
EPI_ISL_1034721	hCoV-19/Hong Kong/HKU-201216-339/2020	2020-11-23	Asia / China / Hong Kong	Human		unknown	unknown	unknown	Original	Throat saliva		B.1.36.27	GH	Nanopore MinION
EPI_ISL_1034726	hCoV-19/Hong Kong/HKU-201216-350/2020	2020-11-26	Asia / China / Hong Kong	Human		unknown	unknown	unknown	Original	Throat saliva		B.1.36.27	GH	Nanopore MinION
EPI_ISL_1034728	hCoV-19/Hong Kong/HKU-201216-357/2020	2020-11-27	Asia / China / Hong Kong	Human		unknown	unknown	unknown	Original	Throat saliva		B.1.36.27	GH	Nanopore MinION
EPI_ISL_1034729	hCoV-19/Hong Kong/HKU-201216-358/2020	2020-11-28	Asia / China / Hong Kong	Human		unknown	unknown	unknown	Original	Throat saliva		B.1.36.27	GH	Nanopore MinION
EPI_ISL_1034732	hCoV-19/Hong Kong/HKU-201216-361/2020	2020-11-28	Asia / China / Hong Kong	Human		unknown	unknown	unknown	Original	Throat saliva		B.1.36.27	GH	Nanopore MinION
EPI_ISL_1034733	hCoV-19/Hong Kong/HKU-201216-363/2020	2020-11-28	Asia / China / Hong Kong	Human		unknown	unknown	unknown	Original	Throat saliva		B.1.36.27	GH	Nanopore MinION
EPI_ISL_1034734	hCoV-19/Hong Kong/HKU-201216-364/2020	2020-11-29	Asia / China / Hong Kong	Human		unknown	unknown	unknown	Original	Throat saliva		B.1.36.27	GH	Nanopore MinION
EPI_ISL_1034735	hCoV-19/Hong Kong/HKU-201216-366/2020	2020-11-29	Asia / China / Hong Kong	Human		unknown	unknown	unknown	Original	Throat saliva		B.1.36.27	GH	Nanopore MinION
EPI_ISL_1035248	hCoV-19/Netherlands/ZH-RIVM-21755/2020	2020-11-02	Europe / Netherlands / Zuid-holland	Human		unknown	86	unknown	Original			B.1.177	GV	Nanopore MinION
EPI_ISL_1035249	hCoV-19/Netherlands/ZH-RIVM-21753/2020	2020-11-02	Europe / Netherlands / Zuid-holland	Human		unknown	34	unknown	Original			B.1.221	G	Nanopore MinION
EPI_ISL_1035663	hCoV-19/Netherlands/LI-RIVM-21754/2020	2020-11-02	Europe / Netherlands / Limburg	Human		unknown	58	unknown	Original			C.16	GR	Nanopore MinION
EPI_ISL_1035697	hCoV-19/Netherlands/GR-RIVM-21756/2020	2020-11-04	Europe / Netherlands / Groningen	Human		unknown	87	unknown	Original			B.1.221	G	Nanopore MinION
EPI_ISL_1036235	hCoV-19/Italy/ABR-BD757/2020	2020-11-06	Europe / Italy / Abruzzo	Human		Male	58	unknown	Original	Nasopharyngeal swab		B.1.177	GV	Ion Torrent
EPI_ISL_1036236	hCoV-19/Italy/ABR-BO313/2020	2020-11-20	Europe / Italy / Abruzzo	Human		Male	73	unknown	Original	Nasopharyngeal swab		B.1.177	GV	Ion Torrent
EPI_ISL_1036324	hCoV-19/USA/MD-HP02298/2020	2020-11-30	North America / USA / Maryland	Human		unknown	12	unknown	Original			B.1.243	G	Nanopore GridION	ARTIC/medaka
EPI_ISL_1036325	hCoV-19/USA/MD-HP02299/2020	2020-11-29	North America / USA / Maryland	Human		unknown	35	unknown	Original			B.1.243	G	Nanopore GridION	ARTIC/medaka
EPI_ISL_1036327	hCoV-19/USA/MD-HP02307/2020	2020-11-28	North America / USA / Maryland	Human		unknown	46	unknown	Original			B.1.2	GH	Nanopore GridION	ARTIC/medaka
EPI_ISL_1036329	hCoV-19/USA/MD-HP02314/2020	2020-11-30	North America / USA / Maryland	Human		unknown	33	unknown	Original			B.1.1.207	GR	Nanopore GridION	ARTIC/medaka
EPI_ISL_1036330	hCoV-19/USA/MD-HP02315/2020	2020-11-30	North America / USA / Maryland	Human		unknown	58	unknown	Original			B.1.243	G	Nanopore GridION	ARTIC/medaka
EPI_ISL_1036333	hCoV-19/USA/MD-HP02329/2020	2020-11-27	North America / USA / Maryland	Human		unknown	41	unknown	Original			B.1.243	G	Nanopore GridION	ARTIC/medaka
EPI_ISL_1038791	hCoV-19/South Korea/USAFSAM-S0437/2020	2020-11-26	Asia / South Korea	Human		unknown	unknown	unknown	Original			B.1.2	GH	Illumina MiSeq V2	BBMap v. 38.86
EPI_ISL_1038852	hCoV-19/USA/CO-CDPHE-2011016510/2020	2020-11-01	North America / USA / Colorado	Human		unknown	unknown	unknown	Original			B.1.2	GH	Illumina MiSeq
EPI_ISL_1038853	hCoV-19/USA/CO-CDPHE-2011016545/2020	2020-11-01	North America / USA / Colorado	Human		unknown	unknown	unknown	Original			B.1.2	GH	Illumina MiSeq
EPI_ISL_1038854	hCoV-19/USA/CO-CDPHE-2011020402/2020	2020-11-01	North America / USA / Colorado	Human		unknown	unknown	unknown	Original			B.1.2	GH	Illumina MiSeq
EPI_ISL_1038945	hCoV-19/USA/NMDOH-2020527143/2020	2020-11-13	North America / USA / New Mexico	Human		Male	32	unknown	Original	Nasopharyngeal swab		B.1.346	GH	Illumina MiSeq	BWA v. 0.7.17-r1188 / iVar v. 1.3
EPI_ISL_1038952	hCoV-19/USA/NMDOH-2020527228/2020	2020-11-14	North America / USA / New Mexico	Human		Female	39	unknown	Original	Nasopharyngeal swab		B.1.346	GH	Illumina MiSeq	BWA v. 0.7.17-r1188 / iVar v. 1.3
EPI_ISL_1038956	hCoV-19/USA/NMDOH-2020527461/2020	2020-11-15	North America / USA / New Mexico	Human		Female	24	unknown	Original	Nasopharyngeal swab		B.1.2	GH	Illumina MiSeq	BWA v. 0.7.17-r1188 / iVar v. 1.3
EPI_ISL_1038961	hCoV-19/USA/NMDOH-2020529652/2020	2020-11-16	North America / USA / New Mexico	Human		Male	48	unknown	Original	Nasopharyngeal swab		B.1.2	GH	Illumina MiSeq	BWA v. 0.7.17-r1188 / iVar v. 1.3
EPI_ISL_1038962	hCoV-19/USA/NMDOH-2020531321/2020	2020-11-16	North America / USA / New Mexico	Human		Female	56	unknown	Original	Nasopharyngeal swab		B.1.2	GH	Illumina MiSeq	BWA v. 0.7.17-r1188 / iVar v. 1.3
EPI_ISL_1038963	hCoV-19/USA/NMDOH-2020534804/2020	2020-11-17	North America / USA / New Mexico	Human		Male	46	unknown	Original	Nasopharyngeal swab		B.1.241	G	Illumina MiSeq	BWA v. 0.7.17-r1188 / iVar v. 1.3
EPI_ISL_1038964	hCoV-19/USA/NMDOH-2020535257/2020	2020-11-17	North America / USA / New Mexico	Human		Male	47	unknown	Original	Nasopharyngeal swab		B.1.240	G	Illumina MiSeq	BWA v. 0.7.17-r1188 / iVar v. 1.3
EPI_ISL_1039058	hCoV-19/Russia/BEL-RII-MH12648S/2020	2020-11-30	Europe / Russia / Belgorod Region / Belgorod	Human		Male	35	unknown	Original	Nasopharyngeal swab		B.1.1.167	GR	Illumina MiSeq	BWA, samtools, ivar, lofreq
EPI_ISL_1039070	hCoV-19/Russia/BEL-RII-MH12725S/2020	2020-11-26	Europe / Russia / Belgorod Region / Belgorod	Human		Female	32	unknown	Original	Nasopharyngeal swab		B.1.1.141	GR	Illumina MiSeq	BWA, samtools, ivar, lofreq
EPI_ISL_1039073	hCoV-19/Russia/BEL-RII-MH12741S/2020	2020-11-27	Europe / Russia / Belgorod Region / Stary Oskol	Human		unknown	19	unknown	Original	Nasopharyngeal swab		B.1.1.317	GR	Illumina MiSeq	BWA, samtools, ivar, lofreq	Gap of 3 nucleotides when compared to the reference sequence.	info
EPI_ISL_1039079	hCoV-19/Russia/BEL-RII-MH12755S/2020	2020-11-27	Europe / Russia / Belgorod Region / Belgorod	Human		Female	5	unknown	Original	Nasopharyngeal swab		B.1.1.29	GR	Illumina MiSeq	BWA, samtools, ivar, lofreq
EPI_ISL_1039082	hCoV-19/Russia/BEL-RII-MH12758S/2020	2020-11-27	Europe / Russia / Belgorod Region / Belgorod	Human		Male	49	unknown	Original	Nasopharyngeal swab		B.1.1.141	GR	Illumina MiSeq	BWA, samtools, ivar, lofreq
EPI_ISL_1039086	hCoV-19/Russia/BEL-RII-MH12763S/2020	2020-11-27	Europe / Russia / Belgorod Region / Prokhorovka	Human		Female	21	unknown	Original	Nasopharyngeal swab		B.1.1.67	GR	Illumina MiSeq	BWA, samtools, ivar, lofreq
EPI_ISL_1039089	hCoV-19/Russia/BEL-RII-MH12773S/2020	2020-11-30	Europe / Russia / Belgorod Region / Stary Oskol	Human		Female	40	unknown	Original	Nasopharyngeal swab		B.1.1.67	GR	Illumina MiSeq	BWA, samtools, ivar, lofreq
EPI_ISL_1039095	hCoV-19/Russia/BEL-RII-MH12792S/2020	2020-11-30	Europe / Russia / Belgorod Region / Stary Oskol	Human		Female	57	unknown	Original	Nasopharyngeal swab		B.1.1.67	GR	Illumina MiSeq	BWA, samtools, ivar, lofreq
EPI_ISL_1039097	hCoV-19/Russia/BEL-RII-MH12801S/2020	2020-11-30	Europe / Russia / Belgorod Region / Stary Oskol	Human		Female	63	unknown	Original	Nasopharyngeal swab		B.1.1.141	GR	Illumina MiSeq	BWA, samtools, ivar, lofreq
EPI_ISL_1039099	hCoV-19/Russia/BEL-RII-MH12814S/2020	2020-11-30	Europe / Russia / Belgorod Region / Stary Oskol	Human		Male	63	unknown	Original	Nasopharyngeal swab		B.1.1.37	GR	Illumina MiSeq	BWA, samtools, ivar, lofreq
EPI_ISL_1039101	hCoV-19/Russia/BEL-RII-MH12817S/2020	2020-11-30	Europe / Russia / Belgorod Region / Stary Oskol	Human		Female	55	unknown	Original	Nasopharyngeal swab		B.1.1.29	GR	Illumina MiSeq	BWA, samtools, ivar, lofreq
EPI_ISL_1039102	hCoV-19/Russia/BEL-RII-MH12819S/2020	2020-11-30	Europe / Russia / Belgorod Region / Stary Oskol	Human		unknown	44	unknown	Original	Nasopharyngeal swab		B.1.1.141	GR	Illumina MiSeq	BWA, samtools, ivar, lofreq
EPI_ISL_1039103	hCoV-19/Russia/BEL-RII-MH12821S/2020	2020-11-30	Europe / Russia / Belgorod Region / Stary Oskol	Human		unknown	75	unknown	Original	Nasopharyngeal swab		B.1.1.63	GR	Illumina MiSeq	BWA, samtools, ivar, lofreq
EPI_ISL_1039104	hCoV-19/Russia/BEL-RII-MH12822S/2020	2020-11-30	Europe / Russia / Belgorod Region / Stary Oskol	Human		Female	55	unknown	Original	Nasopharyngeal swab		B.1.1.130	GR	Illumina MiSeq	BWA, samtools, ivar, lofreq
EPI_ISL_1039113	hCoV-19/Russia/BEL-RII-MH12836S/2020	2020-11-30	Europe / Russia / Belgorod Region / Stary Oskol	Human		unknown	64	unknown	Original	Nasopharyngeal swab		B.1.1.141	GR	Illumina MiSeq	BWA, samtools, ivar, lofreq
EPI_ISL_1039118	hCoV-19/Russia/BEL-RII-MH12845S/2020	2020-11-30	Europe / Russia / Belgorod Region / Belgorod	Human		Female	64	unknown	Original	Nasopharyngeal swab		B.1.1.317	GR	Illumina MiSeq	BWA, samtools, ivar, lofreq
EPI_ISL_1039119	hCoV-19/Russia/BEL-RII-MH12846S/2020	2020-11-30	Europe / Russia / Belgorod Region / Belgorod	Human		unknown	53	unknown	Original	Nasopharyngeal swab		B.1.1.317	GR	Illumina MiSeq	BWA, samtools, ivar, lofreq
EPI_ISL_1039122	hCoV-19/Russia/BEL-RII-MH12849S/2020	2020-11-30	Europe / Russia / Belgorod Region / Prokhorovka	Human		Male	78	unknown	Original	Nasopharyngeal swab		B.1.1.29	GR	Illumina MiSeq	BWA, samtools, ivar, lofreq
EPI_ISL_1039123	hCoV-19/Russia/BEL-RII-MH12858S/2020	2020-11-30	Europe / Russia / Belgorod Region / Belgorod	Human		unknown	31	unknown	Original	Nasopharyngeal swab		B.1.1.1	GR	Illumina MiSeq	BWA, samtools, ivar, lofreq
EPI_ISL_1039141	hCoV-19/Russia/MOW-RII-MH13864S/2020	2020-11-05	Europe / Russia / Moscow / Moscow	Human		unknown	unknown	unknown	Original	Nasopharyngeal swab		B.1.1.313	GR	Illumina MiSeq	BWA, samtools, ivar, lofreq
EPI_ISL_1040682	hCoV-19/South Africa/NHLS-UCT-GS-1098/2020	2020-11-03	Africa / South Africa / Western Cape	Human	Southern	Female	49	unknown	Original			B.1.1.54	GR	Illumina Miseq		NS7b_E33stop results in 25.6% truncation of the protein sequence.	info
EPI_ISL_1040766	hCoV-19/South Africa/NHLS-UCT-GS-8846/2020	2020-11-20	Africa / South Africa / Western Cape	Human	Klipfontein	Male	72	unknown	Original			B.1.237	GV	Illumina Miseq
EPI_ISL_1040768	hCoV-19/South Africa/NHLS-UCT-GS-1118/2020	2020-11-06	Africa / South Africa / Western Cape	Human	Western	Female	32	unknown	Original			B.1.1.54	GR	Illumina Miseq
EPI_ISL_1040769	hCoV-19/South Africa/NHLS-UCT-GS-1115/2020	2020-11-05	Africa / South Africa / Western Cape	Human	Southern	Male	57	unknown	Original			B.1.237	GV	Illumina Miseq
EPI_ISL_1040770	hCoV-19/South Africa/NHLS-UCT-GS-1116/2020	2020-11-05	Africa / South Africa / Western Cape	Human	Southern	Female	37	unknown	Original			B.1.1.57	GR	Illumina Miseq
EPI_ISL_1040771	hCoV-19/South Africa/NHLS-UCT-GS-1117/2020	2020-11-05	Africa / South Africa / Western Cape	Human	Southern	Male	51	unknown	Original			B.1.1.57	GR	Illumina Miseq
EPI_ISL_1040772	hCoV-19/South Africa/NHLS-UCT-GS-1103/2020	2020-11-04	Africa / South Africa / Western Cape	Human	Southern	Female	34	unknown	Original			B.1.237	GV	Illumina Miseq
EPI_ISL_1040773	hCoV-19/South Africa/NHLS-UCT-GS-1104/2020	2020-11-04	Africa / South Africa / Western Cape	Human	Southern	Male	53	unknown	Original			B.1.1.254	GR	Illumina Miseq
EPI_ISL_1040774	hCoV-19/South Africa/NHLS-UCT-GS-1093/2020	2020-11-02	Africa / South Africa / Western Cape	Human	Southern	Female	29	unknown	Original			B.1.1.254	GR	Illumina Miseq
EPI_ISL_1040775	hCoV-19/South Africa/NHLS-UCT-GS-1094/2020	2020-11-02	Africa / South Africa / Western Cape	Human	Southern	Male	22	unknown	Original			B.1	G	Illumina Miseq
EPI_ISL_1048608	hCoV-19/USA/ME-HETL-J1546/2020	2020-11-23	North America / USA / Maine	Human		unknown	unknown	unknown	Original			B.1	GH	Illumina NextSeq	github:tewhey-lab/SARS-CoV-2-Consensus	Gap of 7 nucleotides when compared to the reference sequence.	info
EPI_ISL_1048614	hCoV-19/USA/ME-HETL-J1496/2020	2020-11-08	North America / USA / Maine	Human		unknown	unknown	unknown	Original			B.1.1.180	GR	Illumina NextSeq	github:tewhey-lab/SARS-CoV-2-Consensus	Gap of 3 nucleotides when compared to the reference sequence.	info
EPI_ISL_1048619	hCoV-19/USA/ME-HETL-J1539/2020	2020-11-19	North America / USA / Maine	Human		unknown	unknown	unknown	Original			B.1.2	GH	Illumina NextSeq	github:tewhey-lab/SARS-CoV-2-Consensus	Gap of 10 nucleotides when compared to the reference sequence.	info
EPI_ISL_1048620	hCoV-19/USA/ME-HETL-J1472/2020	2020-11-20	North America / USA / Maine	Human		unknown	unknown	unknown	Original			B.1	GH	Illumina NextSeq	github:tewhey-lab/SARS-CoV-2-Consensus	Gap of 10 nucleotides when compared to the reference sequence.	info
EPI_ISL_1048628	hCoV-19/USA/ME-HETL-J1495/2020	2020-11-08	North America / USA / Maine	Human		unknown	unknown	unknown	Original			B.1.2	GH	Illumina NextSeq	github:tewhey-lab/SARS-CoV-2-Consensus
EPI_ISL_1048629	hCoV-19/USA/ME-HETL-J1494/2020	2020-11-09	North America / USA / Maine	Human		unknown	unknown	unknown	Original			B.1.2	GH	Illumina NextSeq	github:tewhey-lab/SARS-CoV-2-Consensus
EPI_ISL_1048631	hCoV-19/USA/ME-HETL-J1498/2020	2020-11-09	North America / USA / Maine	Human		unknown	unknown	unknown	Original			B.1.2	GH	Illumina NextSeq	github:tewhey-lab/SARS-CoV-2-Consensus
EPI_ISL_1048632	hCoV-19/USA/ME-HETL-J1499/2020	2020-11-09	North America / USA / Maine	Human		unknown	unknown	unknown	Original			B.1.234	G	Illumina NextSeq	github:tewhey-lab/SARS-CoV-2-Consensus
EPI_ISL_1048633	hCoV-19/USA/ME-HETL-J1503/2020	2020-11-09	North America / USA / Maine	Human		unknown	unknown	unknown	Original			B.1.243	G	Illumina NextSeq	github:tewhey-lab/SARS-CoV-2-Consensus
EPI_ISL_1048634	hCoV-19/USA/ME-HETL-J1504/2020	2020-11-09	North America / USA / Maine	Human		unknown	unknown	unknown	Original			B.1.243	G	Illumina NextSeq	github:tewhey-lab/SARS-CoV-2-Consensus
EPI_ISL_1048635	hCoV-19/USA/ME-HETL-J1505/2020	2020-11-09	North America / USA / Maine	Human		unknown	unknown	unknown	Original			B.1.243	G	Illumina NextSeq	github:tewhey-lab/SARS-CoV-2-Consensus
EPI_ISL_1048636	hCoV-19/USA/ME-HETL-J1506/2020	2020-11-09	North America / USA / Maine	Human		unknown	unknown	unknown	Original			B.1.243	G	Illumina NextSeq	github:tewhey-lab/SARS-CoV-2-Consensus
EPI_ISL_1048637	hCoV-19/USA/ME-HETL-J1510/2020	2020-11-09	North America / USA / Maine	Human		unknown	unknown	unknown	Original			B.1.2	GH	Illumina NextSeq	github:tewhey-lab/SARS-CoV-2-Consensus
EPI_ISL_1048638	hCoV-19/USA/ME-HETL-J1511/2020	2020-11-09	North America / USA / Maine	Human		unknown	unknown	unknown	Original			B.1.2	GH	Illumina NextSeq	github:tewhey-lab/SARS-CoV-2-Consensus
EPI_ISL_1048639	hCoV-19/USA/ME-HETL-J1489/2020	2020-11-12	North America / USA / Maine	Human		unknown	unknown	unknown	Original			B.1.2	GH	Illumina NextSeq	github:tewhey-lab/SARS-CoV-2-Consensus
EPI_ISL_1048641	hCoV-19/USA/ME-HETL-J1493/2020	2020-11-12	North America / USA / Maine	Human		unknown	unknown	unknown	Original			B.1.2	GH	Illumina NextSeq	github:tewhey-lab/SARS-CoV-2-Consensus
EPI_ISL_1048642	hCoV-19/USA/ME-HETL-J1536/2020	2020-11-18	North America / USA / Maine	Human		unknown	unknown	unknown	Original			B.1.2	GH	Illumina NextSeq	github:tewhey-lab/SARS-CoV-2-Consensus
EPI_ISL_1048643	hCoV-19/USA/ME-HETL-J1542/2020	2020-11-18	North America / USA / Maine	Human		unknown	unknown	unknown	Original			B.1.2	GH	Illumina NextSeq	github:tewhey-lab/SARS-CoV-2-Consensus
EPI_ISL_1048644	hCoV-19/USA/ME-HETL-J1535/2020	2020-11-19	North America / USA / Maine	Human		unknown	unknown	unknown	Original			B.1.2	GH	Illumina NextSeq	github:tewhey-lab/SARS-CoV-2-Consensus
EPI_ISL_1048645	hCoV-19/USA/ME-HETL-J1540/2020	2020-11-19	North America / USA / Maine	Human		unknown	unknown	unknown	Original			B.1.425	GH	Illumina NextSeq	github:tewhey-lab/SARS-CoV-2-Consensus
EPI_ISL_1048646	hCoV-19/USA/ME-HETL-J1541/2020	2020-11-19	North America / USA / Maine	Human		unknown	unknown	unknown	Original			B.1.2	GH	Illumina NextSeq	github:tewhey-lab/SARS-CoV-2-Consensus
EPI_ISL_1048647	hCoV-19/USA/ME-HETL-J1471/2020	2020-11-20	North America / USA / Maine	Human		unknown	unknown	unknown	Original			B.1.2	GH	Illumina NextSeq	github:tewhey-lab/SARS-CoV-2-Consensus
EPI_ISL_1048648	hCoV-19/USA/ME-HETL-J1473/2020	2020-11-20	North America / USA / Maine	Human		unknown	unknown	unknown	Original			B.1.1.29	GR	Illumina NextSeq	github:tewhey-lab/SARS-CoV-2-Consensus
EPI_ISL_1048649	hCoV-19/USA/ME-HETL-J1543/2020	2020-11-23	North America / USA / Maine	Human		unknown	unknown	unknown	Original			B.1.2	GH	Illumina NextSeq	github:tewhey-lab/SARS-CoV-2-Consensus
EPI_ISL_1048650	hCoV-19/USA/ME-HETL-J1547/2020	2020-11-23	North America / USA / Maine	Human		unknown	unknown	unknown	Original			B.1.2	GH	Illumina NextSeq	github:tewhey-lab/SARS-CoV-2-Consensus
EPI_ISL_1048651	hCoV-19/USA/ME-HETL-J1548/2020	2020-11-23	North America / USA / Maine	Human		unknown	unknown	unknown	Original			B.1.2	GH	Illumina NextSeq	github:tewhey-lab/SARS-CoV-2-Consensus
EPI_ISL_1049337	hCoV-19/USA/CA-IGI-2094/2020	2020-11-30	North America / USA / California / Sacramento County	Human		unknown	unknown	unknown	Original	Nasopharyngeal swab		B.1.2	GH	Illumina MiSeq	minimap2 v2.16-r922/iVar 1.3.1 reference aligned
EPI_ISL_1049517	hCoV-19/USA/WA-S4669/2020	2020-11-11	North America / USA / Washington / King County	Human		unknown	unknown	unknown	Original			B.1.232	G	Illumina NextSeq	Seattle Flu Assembly Pipeline
EPI_ISL_1055114	hCoV-19/Ireland/KY-NVRL-21IRL35823/2020	2020-11-02	Europe / Ireland / Kerry	Human		Male	61-70	unknown	Original	Nasopharyngeal and oropharyngeal swab		B.1.177	GV	Illumina	ARTIC v3 Protocol
EPI_ISL_1055135	hCoV-19/Ireland/KY-NVRL-21IRL35808/2020	2020-11-05	Europe / Ireland / Kerry	Human		Male	71-80	unknown	Original	Nasopharyngeal and oropharyngeal swab		B.1.177	GV	Illumina	ARTIC v3 Protocol
EPI_ISL_1055136	hCoV-19/Ireland/KY-NVRL-21IRL35862/2020	2020-11-02	Europe / Ireland / Kerry	Human		Female	61-70	unknown	Original	Nasopharyngeal and oropharyngeal swab		B.1.177	GV	Illumina	ARTIC v3 Protocol
EPI_ISL_1055142	hCoV-19/Ireland/KY-NVRL-21IRL35809/2020	2020-11-02	Europe / Ireland / Kerry	Human		Female	81-90	unknown	Original	Nasopharyngeal and oropharyngeal swab		B.1.177	GV	Illumina	ARTIC v3 Protocol
EPI_ISL_1055145	hCoV-19/Ireland/KY-NVRL-21IRL35865/2020	2020-11-03	Europe / Ireland / Kerry	Human		Male	71-80	unknown	Original	Nasopharyngeal and oropharyngeal swab		B.1.177	GV	Illumina	ARTIC v3 Protocol
EPI_ISL_1055417	hCoV-19/Canada/NL-NML-3096/2020	2020-11-20	North America / Canada / Newfoundland and Labrador	Human		Female	11	unknown	Original	Nasopharyngeal swab		B.1.438	GH	Nanopore MinION	ARTIC Network Protocol v1
EPI_ISL_1055419	hCoV-19/Canada/NL-NML-3098/2020	2020-11-06	North America / Canada / Newfoundland and Labrador	Human		Female	60	unknown	Original	Nasopharyngeal swab		B.1.258	G	Nanopore MinION	ARTIC Network Protocol v1	Gap of 6 nucleotides when compared to the reference sequence.	info
EPI_ISL_1055420	hCoV-19/Canada/NL-NML-3099/2020	2020-11-13	North America / Canada / Newfoundland and Labrador	Human		Female	36	unknown	Original	Nasopharyngeal swab		B.1.2	GH	Nanopore MinION	ARTIC Network Protocol v1
EPI_ISL_1055421	hCoV-19/Canada/NL-NML-3102/2020	2020-11-17	North America / Canada / Newfoundland and Labrador	Human		Male	47	unknown	Original	Nasopharyngeal swab		B.1.438	GH	Nanopore MinION	ARTIC Network Protocol v1
EPI_ISL_1055422	hCoV-19/Canada/NL-NML-3103/2020	2020-11-17	North America / Canada / Newfoundland and Labrador	Human		Female	91	unknown	Original	Nasopharyngeal swab		B.1.438	GH	Nanopore MinION	ARTIC Network Protocol v1
EPI_ISL_1055423	hCoV-19/Canada/NL-NML-3104/2020	2020-11-18	North America / Canada / Newfoundland and Labrador	Human		Male	83	unknown	Original	Nasopharyngeal swab		B.1.438	GH	Nanopore MinION	ARTIC Network Protocol v1
EPI_ISL_1055424	hCoV-19/Canada/NL-NML-3108/2020	2020-11-20	North America / Canada / Newfoundland and Labrador	Human		Male	81	unknown	Original	Nasopharyngeal swab		B.1.438	GH	Nanopore MinION	ARTIC Network Protocol v1
EPI_ISL_1055426	hCoV-19/Canada/NL-NML-3111/2020	2020-11-22	North America / Canada / Newfoundland and Labrador	Human		Female	6	unknown	Original	Nasopharyngeal swab		B.1.438	GH	Nanopore MinION	ARTIC Network Protocol v1
EPI_ISL_1055579	hCoV-19/Canada/NS-NML-5387/2020	2020-11-22	North America / Canada / Nova Scotia	Human		Male	27	unknown	Original	Nasopharyngeal swab		B.1.1.157	GR	Nanopore MinION	ARTIC Network Protocol v1
EPI_ISL_1055612	hCoV-19/Canada/NS-NML-5429/2020	2020-11-21	North America / Canada / Nova Scotia	Human		Male	26	unknown	Original	Nasopharyngeal swab		B.1.280	GH	Nanopore MinION	ARTIC Network Protocol v1
EPI_ISL_1055623	hCoV-19/Canada/NS-NML-5442/2020	2020-11-20	North America / Canada / Nova Scotia	Human		Female	27	unknown	Original	Nasopharyngeal swab		B.1.36	GH	Nanopore MinION	ARTIC Network Protocol v1
EPI_ISL_1055630	hCoV-19/Canada/NS-NML-5450/2020	2020-11-18	North America / Canada / Nova Scotia	Human		Female	59	unknown	Original	Nasopharyngeal swab		B.1.36	GH	Nanopore MinION	ARTIC Network Protocol v1
EPI_ISL_1059902	hCoV-19/Malaysia/MGI-DNALAB13/2020	2020-11-04	Asia / Malaysia / Negeri Sembilan	Human		Male	42	Live	Original			B.1.36.16	GH	Illumina Miseq	MEGAHIT v1.2.11
EPI_ISL_1060509	hCoV-19/Spain/VC-IBV-98012609/2020	2020-11-08	Europe / Spain / Comunitat Valenciana / Valencia	Human	Patient residence: Europe / Spain / Comunitat Valenciana / Valencia	Female	46	unknown	Original			B.1.1.7	GR	Illumina MiSeq	BWA/IVAR	NS8_Q27stop results in 78.5% truncation of the protein sequence. Gap of 19 nucleotides when compared to the reference sequence.	info
EPI_ISL_1060510	hCoV-19/Spain/VC-IBV-98012610/2020	2020-11-08	Europe / Spain / Comunitat Valenciana / Valencia	Human	Patient residence: Europe / Spain / Comunitat Valenciana / Valencia	Male	59	unknown	Original			B.1.1.7	GR	Illumina MiSeq	BWA/IVAR	NS8_Q27stop results in 78.5% truncation of the protein sequence. Gap of 19 nucleotides when compared to the reference sequence.	info
EPI_ISL_1060871	hCoV-19/USA/OR-PROV-594/2020	2020-11-07	North America / USA / Oregon	Human		Male	unknown	unknown	Original			B.1.487	GH	Illumina iSeq 100	BWA mem, Freebayes, vcffilter, bcftools consensus (AF >=50%, min DP > 100)	Gap of 1 nucleotide(s) found at refpos 26161 (FRAMESHIFT confirmed by submitter). NS3 without BLAST coverage.	info
EPI_ISL_1061405	hCoV-19/Hong Kong/HKCH_349/2020	2020-11-11	Asia / China / Hong Kong	Human		Male	65	Released	Original	Nasopharyngeal swab and throat swab		B.1.36.27	GH	Illumina
EPI_ISL_1061408	hCoV-19/Hong Kong/HKCH_380/2020	2020-11-21	Asia / China / Hong Kong	Human		Male	31	Released	Original	Nasopharyngeal aspirate and throat swab		B.1.36.27	GH	Illumina
EPI_ISL_1061409	hCoV-19/Hong Kong/HKCH_382/2020	2020-11-21	Asia / China / Hong Kong	Human		Male	52	Released	Original	Nasopharyngeal aspirate and throat swab		B.1.36.27	GH	Illumina
EPI_ISL_1061410	hCoV-19/Hong Kong/HKCH_385/2020	2020-11-21	Asia / China / Hong Kong	Human		Male	43	Released	Original	Nasopharyngeal swab and throat swab		B.1.36.27	GH	Illumina
EPI_ISL_1061411	hCoV-19/Hong Kong/HKCH_390/2020	2020-11-22	Asia / China / Hong Kong	Human		Male	49	Released	Original	Nasopharyngeal swab and throat swab		B.1.36.27	GH	Illumina
EPI_ISL_1063636	hCoV-19/South Korea/KDCA1338/2020	2020-11-14	Asia / South Korea	Human		Female	60	unknown	Original			B.1.497	GH	Illumina MiSeq
EPI_ISL_1063637	hCoV-19/South Korea/KDCA1336/2020	2020-11-16	Asia / South Korea	Human		Female	59	unknown	Original			B.1.497	GH	Illumina MiSeq
EPI_ISL_1063638	hCoV-19/South Korea/KDCA1337/2020	2020-11-16	Asia / South Korea	Human		Female	60	unknown	Original			B.1.497	GH	Illumina MiSeq
EPI_ISL_1063678	hCoV-19/South Korea/KDCA1423/2020	2020-11-24	Asia / South Korea	Human	Imported case from Hungary	Male	69	unknown	Original			B.1.160	GH	Illumina MiSeq
EPI_ISL_1063688	hCoV-19/South Korea/KDCA1458/2020	2020-11-29	Asia / South Korea	Human	Imported case from Switzerland	Male	51	unknown	Original			B.1.177	GV	Illumina MiSeq
EPI_ISL_1063808	hCoV-19/India/OR-ILSGS00070/2020	2020-11-09	Asia / India / Odisha	Human		Female	48	unknown	Original			B.1.1.29	GR	Illumina NextSeq550	Reference-based	NSP14_Y420stop results in 20.5% truncation of the protein sequence.	info
EPI_ISL_1063862	hCoV-19/India/OR-ILSGS00037/2020	2020-11-03	Asia / India / Odisha	Human		Female	70	unknown	Original			B.1.1.216	GR	Illumina NextSeq550	Reference-based
EPI_ISL_1063864	hCoV-19/India/OR-ILSGS00039/2020	2020-11-03	Asia / India / Odisha	Human		Female	18	unknown	Original			B.1.1.317	GR	Illumina NextSeq550	Reference-based
EPI_ISL_1063866	hCoV-19/India/OR-ILSGS00041/2020	2020-11-03	Asia / India / Odisha	Human		Male	46	unknown	Original			B.1.1.29	GR	Illumina NextSeq550	Reference-based
EPI_ISL_1063867	hCoV-19/India/OR-ILSGS00042/2020	2020-11-03	Asia / India / Odisha	Human		Male	62	unknown	Original			B.1.1.29	GR	Illumina NextSeq550	Reference-based
EPI_ISL_1063868	hCoV-19/India/OR-ILSGS00043/2020	2020-11-03	Asia / India / Odisha	Human		Male	32	unknown	Original			B.1.1.29	GR	Illumina NextSeq550	Reference-based
EPI_ISL_1063869	hCoV-19/India/OR-ILSGS00044/2020	2020-11-08	Asia / India / Odisha	Human		Male	25	unknown	Original			B.1.1.317	GR	Illumina NextSeq550	Reference-based
EPI_ISL_1063870	hCoV-19/India/OR-ILSGS00045/2020	2020-11-08	Asia / India / Odisha	Human		Female	50	unknown	Original			B.1.1.216	GR	Illumina NextSeq550	Reference-based
EPI_ISL_1063871	hCoV-19/India/OR-ILSGS00046/2020	2020-11-08	Asia / India / Odisha	Human		Male	15	unknown	Original			B.1.1.46	GR	Illumina NextSeq550	Reference-based
EPI_ISL_1063872	hCoV-19/India/OR-ILSGS00047/2020	2020-11-08	Asia / India / Odisha	Human		Female	57	unknown	Original			B.1.1.281	GR	Illumina NextSeq550	Reference-based
EPI_ISL_1063873	hCoV-19/India/OR-ILSGS00048/2020	2020-11-17	Asia / India / Odisha	Human		Male	52	unknown	Original			B.1.369	G	Illumina NextSeq550	Reference-based
EPI_ISL_1063874	hCoV-19/India/OR-ILSGS00049/2020	2020-11-17	Asia / India / Odisha	Human		Male	28	unknown	Original			B.1.1.317	GR	Illumina NextSeq550	Reference-based
EPI_ISL_1063875	hCoV-19/India/OR-ILSGS00050/2020	2020-11-17	Asia / India / Odisha	Human		Female	71	unknown	Original			B.1.1.317	GR	Illumina NextSeq550	Reference-based
EPI_ISL_1063876	hCoV-19/India/OR-ILSGS00051/2020	2020-11-17	Asia / India / Odisha	Human		Female	20	unknown	Original			B.1.1.317	GR	Illumina NextSeq550	Reference-based
EPI_ISL_1063878	hCoV-19/India/OR-ILSGS00061/2020	2020-11-02	Asia / India / Odisha	Human		Female	38	unknown	Original			B.1.1.29	GR	Illumina NextSeq550	Reference-based
EPI_ISL_1063879	hCoV-19/India/OR-ILSGS00062/2020	2020-11-09	Asia / India / Odisha	Human		Male	45	unknown	Original			B.1.1.29	GR	Illumina NextSeq550	Reference-based
EPI_ISL_1063880	hCoV-19/India/OR-ILSGS00063/2020	2020-11-09	Asia / India / Odisha	Human		Male	35	unknown	Original			B.1.1.38	GR	Illumina NextSeq550	Reference-based
EPI_ISL_1063881	hCoV-19/India/OR-ILSGS00064/2020	2020-11-09	Asia / India / Odisha	Human		Female	60	unknown	Original			B.1.1.29	GR	Illumina NextSeq550	Reference-based
EPI_ISL_1063882	hCoV-19/India/OR-ILSGS00065/2020	2020-11-09	Asia / India / Odisha	Human		Female	11	unknown	Original			B.1.1.34	GR	Illumina NextSeq550	Reference-based
EPI_ISL_1063884	hCoV-19/India/OR-ILSGS00067/2020	2020-11-09	Asia / India / Odisha	Human		Female	62	unknown	Original			B.1.1.29	GR	Illumina NextSeq550	Reference-based
EPI_ISL_1063885	hCoV-19/India/OR-ILSGS00068/2020	2020-11-09	Asia / India / Odisha	Human		Male	32	unknown	Original			B.1.1.212	GR	Illumina NextSeq550	Reference-based
EPI_ISL_1063886	hCoV-19/India/OR-ILSGS00069/2020	2020-11-09	Asia / India / Odisha	Human		Male	32	unknown	Original			B.1.1.29	GR	Illumina NextSeq550	Reference-based
EPI_ISL_1063887	hCoV-19/India/OR-ILSGS00071/2020	2020-11-10	Asia / India / Odisha	Human		Male	34	unknown	Original			B.1.1.29	G	Illumina NextSeq550	Reference-based
EPI_ISL_1063888	hCoV-19/India/OR-ILSGS00072/2020	2020-11-02	Asia / India / Odisha	Human		Female	13	unknown	Original			B.1.1.29	GR	Illumina NextSeq550	Reference-based
EPI_ISL_1063889	hCoV-19/India/OR-ILSGS00073/2020	2020-11-03	Asia / India / Odisha	Human		Male	20	unknown	Original			B.1.1.29	GR	Illumina NextSeq550	Reference-based
EPI_ISL_1063890	hCoV-19/India/OR-ILSGS00074/2020	2020-11-03	Asia / India / Odisha	Human		Male	47	unknown	Original			B.1.1.29	GR	Illumina NextSeq550	Reference-based
EPI_ISL_1063893	hCoV-19/India/OR-ILSGS00077/2020	2020-11-03	Asia / India / Odisha	Human		Male	15	unknown	Original			B.1.1.29	GR	Illumina NextSeq550	Reference-based
EPI_ISL_1063894	hCoV-19/India/OR-ILSGS00078/2020	2020-11-05	Asia / India / Odisha	Human		Female	24	unknown	Original			B.1.1.109	GR	Illumina NextSeq550	Reference-based
EPI_ISL_1063895	hCoV-19/India/OR-ILSGS00079/2020	2020-11-03	Asia / India / Odisha	Human		Male	57	unknown	Original			B.1.1.29	GR	Illumina NextSeq550	Reference-based
EPI_ISL_1064694	hCoV-19/Sweden/21-20617/2020	2020-11-12	Europe / Sweden / Vasterbotten	Human		Male	32	unknown	Original			B.1.160	GH	Ion Torrent S5 XL, Ion AmpliSeq SARS-CoV-2	Consensus extraction from NC_045512 using torrent suite variantCaller with majority wins and positions with lower than 20x coverage masked with N
EPI_ISL_1065103	hCoV-19/Denmark/DCGC-45593/2020	2020-11-30	Europe / Denmark / Hovedstaden	Human		unknown	unknown	unknown	Original			B.1.258.11	G	Oxford Nanopore	ARTIC-ncov2019 v1.1.0	Gap of 6 nucleotides when compared to the reference sequence.	info
EPI_ISL_1065275	hCoV-19/Denmark/DCGC-45765/2020	2020-11-09	Europe / Denmark / Midtjylland	Human		unknown	unknown	unknown	Original			B.1.1	GR	Oxford Nanopore	ARTIC-ncov2019 v1.1.0
EPI_ISL_1065294	hCoV-19/Denmark/DCGC-45784/2020	2020-11-16	Europe / Denmark / Sjaelland	Human		unknown	unknown	unknown	Original			B.1.1.186	GR	Oxford Nanopore	ARTIC-ncov2019 v1.1.0
EPI_ISL_1065312	hCoV-19/Denmark/DCGC-45802/2020	2020-11-09	Europe / Denmark / Hovedstaden	Human		unknown	unknown	unknown	Original			B.1.177.21	GV	Oxford Nanopore	ARTIC-ncov2019 v1.1.0
EPI_ISL_1065370	hCoV-19/Denmark/DCGC-45860/2020	2020-11-16	Europe / Denmark / Hovedstaden	Human		unknown	unknown	unknown	Original			B.1.258.11	G	Oxford Nanopore	ARTIC-ncov2019 v1.1.0	Gap of 6 nucleotides when compared to the reference sequence.	info
EPI_ISL_1065437	hCoV-19/Denmark/DCGC-45927/2020	2020-11-16	Europe / Denmark / Hovedstaden	Human		unknown	unknown	unknown	Original			B.1.221	G	Oxford Nanopore	ARTIC-ncov2019 v1.1.0
EPI_ISL_1065587	hCoV-19/Denmark/DCGC-46077/2020	2020-11-16	Europe / Denmark / Hovedstaden	Human		unknown	unknown	unknown	Original			B.1.177	GV	Oxford Nanopore	ARTIC-ncov2019 v1.1.0
EPI_ISL_1065603	hCoV-19/Denmark/DCGC-46093/2020	2020-11-23	Europe / Denmark / Midtjylland	Human		unknown	unknown	unknown	Original			B.1.177.12	GV	Oxford Nanopore	ARTIC-ncov2019 v1.1.0
EPI_ISL_1065614	hCoV-19/Denmark/DCGC-46104/2020	2020-11-23	Europe / Denmark / Midtjylland	Human		unknown	unknown	unknown	Original			B.1.177.12	GV	Oxford Nanopore	ARTIC-ncov2019 v1.1.0
EPI_ISL_1065662	hCoV-19/Denmark/DCGC-46152/2020	2020-11-16	Europe / Denmark / Sjaelland	Human		unknown	unknown	unknown	Original			B.1.221	G	Oxford Nanopore	ARTIC-ncov2019 v1.1.0
EPI_ISL_1065764	hCoV-19/Denmark/DCGC-46254/2020	2020-11-23	Europe / Denmark / Midtjylland	Human		unknown	unknown	unknown	Original			B.1.177.12	GV	Oxford Nanopore	ARTIC-ncov2019 v1.1.0
EPI_ISL_1065886	hCoV-19/Denmark/DCGC-46376/2020	2020-11-09	Europe / Denmark / Hovedstaden	Human		unknown	unknown	unknown	Original			B.1.1.294	GR	Oxford Nanopore	ARTIC-ncov2019 v1.1.0	Gap of 14 nucleotides when compared to the reference sequence.	info
EPI_ISL_1065939	hCoV-19/Denmark/DCGC-46429/2020	2020-11-23	Europe / Denmark / Midtjylland	Human		unknown	unknown	unknown	Original			B.1.1.298	GR	Oxford Nanopore	ARTIC-ncov2019 v1.1.0	Gap of 13 nucleotides when compared to the reference sequence.	info
EPI_ISL_1066147	hCoV-19/Denmark/DCGC-46637/2020	2020-11-23	Europe / Denmark / Midtjylland	Human		unknown	unknown	unknown	Original			B.1.127	G	Oxford Nanopore	ARTIC-ncov2019 v1.1.0
EPI_ISL_1066181	hCoV-19/Denmark/DCGC-46671/2020	2020-11-23	Europe / Denmark / Hovedstaden	Human		unknown	unknown	unknown	Original			B.1.221	G	Oxford Nanopore	ARTIC-ncov2019 v1.1.0
EPI_ISL_1066231	hCoV-19/Denmark/DCGC-46721/2020	2020-11-23	Europe / Denmark / Midtjylland	Human		unknown	unknown	unknown	Original			B.1.177.12	GV	Oxford Nanopore	ARTIC-ncov2019 v1.1.0
EPI_ISL_1066241	hCoV-19/Denmark/DCGC-46731/2020	2020-11-23	Europe / Denmark / Midtjylland	Human		unknown	unknown	unknown	Original			B.1.177	GV	Oxford Nanopore	ARTIC-ncov2019 v1.1.0
EPI_ISL_1066255	hCoV-19/Denmark/DCGC-46745/2020	2020-11-23	Europe / Denmark / Midtjylland	Human		unknown	unknown	unknown	Original			B.1.177.12	GV	Oxford Nanopore	ARTIC-ncov2019 v1.1.0
EPI_ISL_1066303	hCoV-19/Denmark/DCGC-46793/2020	2020-11-09	Europe / Denmark / Hovedstaden	Human		unknown	unknown	unknown	Original			B.1.1.315	GR	Oxford Nanopore	ARTIC-ncov2019 v1.1.0
EPI_ISL_1066427	hCoV-19/Denmark/DCGC-46916/2020	2020-11-23	Europe / Denmark / Hovedstaden	Human		unknown	unknown	unknown	Original			B.1.160	GH	Oxford Nanopore	ARTIC-ncov2019 v1.1.0
EPI_ISL_1066450	hCoV-19/Denmark/DCGC-46939/2020	2020-11-16	Europe / Denmark / Midtjylland	Human		unknown	unknown	unknown	Original			B.1.177.12	GV	Oxford Nanopore	ARTIC-ncov2019 v1.1.0
EPI_ISL_1066560	hCoV-19/Denmark/DCGC-47049/2020	2020-11-16	Europe / Denmark / Hovedstaden	Human		unknown	unknown	unknown	Original			B.1.1.294	GR	Oxford Nanopore	ARTIC-ncov2019 v1.1.0	Gap of 14 nucleotides when compared to the reference sequence.	info
EPI_ISL_1066577	hCoV-19/Denmark/DCGC-47066/2020	2020-11-02	Europe / Denmark / Hovedstaden	Human		unknown	unknown	unknown	Original			B.1.221	G	Oxford Nanopore	ARTIC-ncov2019 v1.1.0
EPI_ISL_1066678	hCoV-19/Denmark/DCGC-47165/2020	2020-11-16	Europe / Denmark / Midtjylland	Human		unknown	unknown	unknown	Original			B.1.177.12	GV	Oxford Nanopore	ARTIC-ncov2019 v1.1.0
EPI_ISL_1066715	hCoV-19/Denmark/DCGC-47202/2020	2020-11-16	Europe / Denmark / Hovedstaden	Human		unknown	unknown	unknown	Original			B.1.160	GH	Oxford Nanopore	ARTIC-ncov2019 v1.1.0
EPI_ISL_1066882	hCoV-19/Denmark/DCGC-47347/2020	2020-11-23	Europe / Denmark / Midtjylland	Human		unknown	unknown	unknown	Original			B.1.127	G	Oxford Nanopore	ARTIC-ncov2019 v1.1.0
EPI_ISL_1066933	hCoV-19/Denmark/DCGC-47398/2020	2020-11-16	Europe / Denmark / Hovedstaden	Human		unknown	unknown	unknown	Original			B.1.177.21	GV	Oxford Nanopore	ARTIC-ncov2019 v1.1.0
EPI_ISL_1067182	hCoV-19/Denmark/DCGC-47647/2020	2020-11-16	Europe / Denmark / Midtjylland	Human		unknown	unknown	unknown	Original			B.1.177.12	GV	Oxford Nanopore	ARTIC-ncov2019 v1.1.0
EPI_ISL_1067191	hCoV-19/Denmark/DCGC-47656/2020	2020-11-09	Europe / Denmark / Hovedstaden	Human		unknown	unknown	unknown	Original			B.1.258.11	G	Oxford Nanopore	ARTIC-ncov2019 v1.1.0	Gap of 6 nucleotides when compared to the reference sequence.	info
EPI_ISL_1067215	hCoV-19/Denmark/DCGC-47680/2020	2020-11-30	Europe / Denmark / Midtjylland	Human		unknown	unknown	unknown	Original			B.1.177.12	GV	Oxford Nanopore	ARTIC-ncov2019 v1.1.0
EPI_ISL_1067288	hCoV-19/Denmark/DCGC-47753/2020	2020-11-09	Europe / Denmark / Sjaelland	Human		unknown	unknown	unknown	Original			B.1.160	GH	Oxford Nanopore	ARTIC-ncov2019 v1.1.0
EPI_ISL_1067293	hCoV-19/Denmark/DCGC-47758/2020	2020-11-23	Europe / Denmark / Midtjylland	Human		unknown	unknown	unknown	Original			B.1.177.12	GV	Oxford Nanopore	ARTIC-ncov2019 v1.1.0
EPI_ISL_1067364	hCoV-19/Denmark/DCGC-47829/2020	2020-11-16	Europe / Denmark / Hovedstaden	Human		unknown	unknown	unknown	Original			B.1.1.294	GR	Oxford Nanopore	ARTIC-ncov2019 v1.1.0	Gap of 1 nucleotide(s) found at refpos 11083 (FRAMESHIFT confirmed by submitter). Gap of 15 nucleotides when compared to the reference sequence.	info
EPI_ISL_1067409	hCoV-19/Denmark/DCGC-47874/2020	2020-11-23	Europe / Denmark / Midtjylland	Human		unknown	unknown	unknown	Original			B.1.127	G	Oxford Nanopore	ARTIC-ncov2019 v1.1.0
EPI_ISL_1067414	hCoV-19/Denmark/DCGC-47879/2020	2020-11-09	Europe / Denmark / Hovedstaden	Human		unknown	unknown	unknown	Original			B.1.177.21	GV	Oxford Nanopore	ARTIC-ncov2019 v1.1.0
EPI_ISL_1067433	hCoV-19/Denmark/DCGC-47898/2020	2020-11-16	Europe / Denmark / Hovedstaden	Human		unknown	unknown	unknown	Original			B.1.177	GV	Oxford Nanopore	ARTIC-ncov2019 v1.1.0
EPI_ISL_1067448	hCoV-19/Denmark/DCGC-47913/2020	2020-11-23	Europe / Denmark / Midtjylland	Human		unknown	unknown	unknown	Original			B.1.177.12	GV	Oxford Nanopore	ARTIC-ncov2019 v1.1.0
EPI_ISL_1067487	hCoV-19/Denmark/DCGC-47952/2020	2020-11-09	Europe / Denmark	Human		unknown	unknown	unknown	Original			B.1.1.288	GR	Oxford Nanopore	ARTIC-ncov2019 v1.1.0
EPI_ISL_1067489	hCoV-19/Denmark/DCGC-47954/2020	2020-11-30	Europe / Denmark / Hovedstaden	Human		unknown	unknown	unknown	Original			B.1.160.8	GH	Oxford Nanopore	ARTIC-ncov2019 v1.1.0	Gap of 1 nucleotide(s) found at refpos 29588 (FRAMESHIFT confirmed by submitter).	info
EPI_ISL_1067504	hCoV-19/Denmark/DCGC-47969/2020	2020-11-23	Europe / Denmark / Midtjylland	Human		unknown	unknown	unknown	Original			B.1.177.12	GV	Oxford Nanopore	ARTIC-ncov2019 v1.1.0
EPI_ISL_1067524	hCoV-19/Denmark/DCGC-47989/2020	2020-11-23	Europe / Denmark / Midtjylland	Human		unknown	unknown	unknown	Original			B.1.160	GH	Oxford Nanopore	ARTIC-ncov2019 v1.1.0	Gap of 3 nucleotides when compared to the reference sequence.	info
EPI_ISL_1067535	hCoV-19/Denmark/DCGC-48000/2020	2020-11-16	Europe / Denmark / Hovedstaden	Human		unknown	unknown	unknown	Original			B.1.177	GV	Oxford Nanopore	ARTIC-ncov2019 v1.1.0
EPI_ISL_1067917	hCoV-19/USA/WI-WSLH-211083/2020	2020-11-30	North America / USA / Wisconsin / Fond Du Lac County	Human		unknown	unknown	unknown	Original			B.1.139	G	Illumina
EPI_ISL_1067918	hCoV-19/USA/WI-WSLH-211091/2020	2020-11-30	North America / USA / Wisconsin / Fond Du Lac County	Human		unknown	unknown	unknown	Original			B.1.2	GH	Illumina
EPI_ISL_1067919	hCoV-19/USA/WI-WSLH-211093/2020	2020-11-30	North America / USA / Wisconsin / Fond Du Lac County	Human		unknown	unknown	unknown	Original			B.1.2	GH	Illumina
EPI_ISL_1067920	hCoV-19/USA/WI-WSLH-211133/2020	2020-11-30	North America / USA / Wisconsin / Fond Du Lac County	Human		unknown	unknown	unknown	Original			B.1.2	GH	Illumina
EPI_ISL_1067922	hCoV-19/USA/WI-WSLH-211086/2020	2020-11-27	North America / USA / Wisconsin / Fond Du Lac County	Human		unknown	unknown	unknown	Original			B.1.139	G	Illumina
EPI_ISL_1067926	hCoV-19/USA/WI-WSLH-211137/2020	2020-11-27	North America / USA / Wisconsin / Fond Du Lac County	Human		unknown	unknown	unknown	Original			B.1.139	G	Illumina
EPI_ISL_1067932	hCoV-19/USA/WI-WSLH-211109/2020	2020-11-24	North America / USA / Wisconsin / Fond Du Lac County	Human		unknown	unknown	unknown	Original			B.1.2	GH	Illumina
EPI_ISL_1067933	hCoV-19/USA/WI-WSLH-211140/2020	2020-11-24	North America / USA / Wisconsin / Fond Du Lac County	Human		unknown	unknown	unknown	Original			B.1.139	G	Illumina
EPI_ISL_1067934	hCoV-19/USA/WI-WSLH-211107/2020	2020-11-23	North America / USA / Wisconsin / Fond Du Lac County	Human		unknown	unknown	unknown	Original			B.1.139	G	Illumina
EPI_ISL_1067935	hCoV-19/USA/WI-WSLH-211115/2020	2020-11-23	North America / USA / Wisconsin / Fond Du Lac County	Human		unknown	unknown	unknown	Original			B.1.2	GH	Illumina
EPI_ISL_1067936	hCoV-19/USA/WI-WSLH-211118/2020	2020-11-23	North America / USA / Wisconsin / Fond Du Lac County	Human		unknown	unknown	unknown	Original			B.1.139	G	Illumina
EPI_ISL_1067937	hCoV-19/USA/WI-WSLH-211084/2020	2020-11-20	North America / USA / Wisconsin / Fond Du Lac County	Human		unknown	unknown	unknown	Original			B.1.139	G	Illumina
EPI_ISL_1067939	hCoV-19/USA/WI-WSLH-211096/2020	2020-11-18	North America / USA / Wisconsin / Fond Du Lac County	Human		unknown	unknown	unknown	Original			B.1.139	G	Illumina
EPI_ISL_1067940	hCoV-19/USA/WI-WSLH-211129/2020	2020-11-06	North America / USA / Wisconsin / Fond Du Lac County	Human		unknown	unknown	unknown	Original			B.1.139	G	Illumina
EPI_ISL_1067941	hCoV-19/USA/WI-WSLH-211101/2020	2020-11-02	North America / USA / Wisconsin / Fond Du Lac County	Human		unknown	unknown	unknown	Original			B.1.2	GH	Illumina
EPI_ISL_1067942	hCoV-19/USA/WI-WSLH-211103/2020	2020-11-02	North America / USA / Wisconsin / Fond Du Lac County	Human		unknown	unknown	unknown	Original			B.1.2	GH	Illumina
EPI_ISL_1068105	hCoV-19/Brazil/AM-20142346FB/2020	2020-11-03	South America / Brazil / Amazonas / Manaus	Human		Female	36	unknown	Original	Oropharyngeal swab		B.1.1.28	GR	Illumina MiSeq	BBMap 37.25 embedded in Geneious 10.2.31
EPI_ISL_1068106	hCoV-19/Brazil/AM-20142371CJ/2020	2020-11-05	South America / Brazil / Amazonas / Manaus	Human		Female	44	unknown	Original	Oropharyngeal swab		B.1.1.28	GR	Illumina MiSeq	BBMap 37.25 embedded in Geneious 10.2.32
EPI_ISL_1068126	hCoV-19/Brazil/AM-20842408LA/2020	2020-11-03	South America / Brazil / Amazonas / Manaus	Human		Male	85	unknown	Original	Oropharyngeal swab		B.1.1.28	GR	Illumina MiSeq	BBMap 37.25 embedded in Geneious 10.2.52
EPI_ISL_1068127	hCoV-19/Brazil/AM-20842451CN/2020	2020-11-04	South America / Brazil / Amazonas / Manaus	Human		Female	39	unknown	Original	Oropharyngeal swab		B.1.1.28	GR	Illumina MiSeq	BBMap 37.25 embedded in Geneious 10.2.53
EPI_ISL_1068128	hCoV-19/Brazil/AM-20842455CA/2020	2020-11-05	South America / Brazil / Amazonas / Manaus	Human		Female	41	unknown	Original	Oropharyngeal swab		B.1.1.28	GR	Illumina MiSeq	BBMap 37.25 embedded in Geneious 10.2.54
EPI_ISL_1068129	hCoV-19/Brazil/AM-20842532JA/2020	2020-11-11	South America / Brazil / Amazonas / Manaus	Human		Male	65	unknown	Original	Oropharyngeal swab		B.1.1.28	GR	Illumina MiSeq	BBMap 37.25 embedded in Geneious 10.2.56
EPI_ISL_1068130	hCoV-19/Brazil/AM-20842533AP/2020	2020-11-11	South America / Brazil / Amazonas / Manaus	Human		Female	54	unknown	Original	Oropharyngeal swab		B.1.1.28	GR	Illumina MiSeq	BBMap 37.25 embedded in Geneious 10.2.57
EPI_ISL_1068131	hCoV-19/Brazil/AM-20842559AS/2020	2020-11-12	South America / Brazil / Amazonas / Manaus	Human		Female	46	unknown	Original	Oropharyngeal swab		B.1.1.28	GR	Illumina MiSeq	BBMap 37.25 embedded in Geneious 10.2.58
EPI_ISL_1068132	hCoV-19/Brazil/AM-20842572LS/2020	2020-11-13	South America / Brazil / Amazonas / Manaus	Human		Female	46	unknown	Original	Oropharyngeal swab		L.2	GR	Illumina MiSeq	BBMap 37.25 embedded in Geneious 10.2.59	Gap of 3 nucleotides when compared to the reference sequence.	info
EPI_ISL_1068133	hCoV-19/Brazil/AM-20842578TG/2020	2020-11-13	South America / Brazil / Amazonas / Manaus	Human		Male	53	unknown	Original	Oropharyngeal swab		B.1.1.28	GR	Illumina MiSeq	BBMap 37.25 embedded in Geneious 10.2.60
EPI_ISL_1068134	hCoV-19/Brazil/AM-20842652AF/2020	2020-11-17	South America / Brazil / Amazonas / Manaus	Human		Male	29	unknown	Original	Oropharyngeal swab		B.1.1.28	GR	Illumina MiSeq	BBMap 37.25 embedded in Geneious 10.2.61
EPI_ISL_1068135	hCoV-19/Brazil/AM-20842657BJ/2020	2020-11-17	South America / Brazil / Amazonas / Manaus	Human		Female	18	unknown	Original	Oropharyngeal swab		B.1.1.28	GR	Illumina MiSeq	BBMap 37.25 embedded in Geneious 10.2.62
EPI_ISL_1068136	hCoV-19/Brazil/AM-20842670AC/2020	2020-11-18	South America / Brazil / Amazonas / Manaus	Human		Male	40	unknown	Original	Oropharyngeal swab		B.1.1.28	GR	Illumina MiSeq	BBMap 37.25 embedded in Geneious 10.2.63
EPI_ISL_1068137	hCoV-19/Brazil/AM-20842695EA/2020	2020-11-19	South America / Brazil / Amazonas / Manaus	Human		Male	41	unknown	Original	Oropharyngeal swab		B.1.1.28	GR	Illumina MiSeq	BBMap 37.25 embedded in Geneious 10.2.64
EPI_ISL_1068138	hCoV-19/Brazil/AM-20842703OP/2020	2020-11-23	South America / Brazil / Amazonas / Manaus	Human		Female	65	unknown	Original	Oropharyngeal swab		B.1.1.28	GR	Illumina MiSeq	BBMap 37.25 embedded in Geneious 10.2.65
EPI_ISL_1068139	hCoV-19/Brazil/AM-20842719LR/2020	2020-11-24	South America / Brazil / Amazonas / Manaus	Human		Female	18	unknown	Original	Oropharyngeal swab		B.1.1.33	GR	Illumina MiSeq	BBMap 37.25 embedded in Geneious 10.2.66
EPI_ISL_1068140	hCoV-19/Brazil/AM-20842781AF/2020	2020-11-27	South America / Brazil / Amazonas / Manaus	Human		Male	58	unknown	Original	Oropharyngeal swab		B.1.1.33	GR	Illumina MiSeq	BBMap 37.25 embedded in Geneious 10.2.67
EPI_ISL_1068141	hCoV-19/Brazil/AM-20842818CE/2020	2020-11-30	South America / Brazil / Amazonas / Manaus	Human		Male	32	unknown	Original	Oropharyngeal swab		B.1.1.28	GR	Illumina MiSeq	BBMap 37.25 embedded in Geneious 10.2.68
EPI_ISL_1068351	hCoV-19/Brazil/BA-37.1/2020	2020-11-12	South America / Brazil / Bahia	Human		Female	14	unknown	Original			B.1.1.33	GR	Ion Torrent	Genome Detective
EPI_ISL_1068358	hCoV-19/Brazil/BA-44.1/2020	2020-11-13	South America / Brazil / Bahia	Human		Female	44	unknown	Original			B.1.1.28	GR	Ion Torrent	Genome Detective
EPI_ISL_1068360	hCoV-19/Brazil/BA-46.1/2020	2020-11-13	South America / Brazil / Bahia	Human		Male	29	unknown	Original			B.1.1.33	GR	Ion Torrent	Genome Detective
EPI_ISL_1068361	hCoV-19/Brazil/BA-47.1/2020	2020-11-14	South America / Brazil / Bahia	Human		Female	66	unknown	Original			B.1.1.33	GR	Ion Torrent	Genome Detective
EPI_ISL_1073815	hCoV-19/USA/KS-KHEL-0233/2020	2020-11-04	North America / USA / Kansas	Human		Female	68	unknown	Original			B.1.2	GH	iSeq	minimap2/ivar
EPI_ISL_1073816	hCoV-19/USA/KS-KHEL-0232/2020	2020-11-03	North America / USA / Kansas	Human		Female	27	unknown	Original			B.1.311	GH	iSeq	minimap2/ivar
EPI_ISL_1076566	hCoV-19/USA/TX-HMH-MCoV-22039/2020	2020-11-19	North America / USA / Texas / Houston	Human		unknown	unknown	unknown	Original			B.1.2	GH	Illumina	ARTIC V3
EPI_ISL_1076567	hCoV-19/USA/TX-HMH-MCoV-22040/2020	2020-11-19	North America / USA / Texas / Houston	Human		unknown	unknown	unknown	Original			B.1.2	GH	Illumina	ARTIC V3
EPI_ISL_1076569	hCoV-19/USA/TX-HMH-MCoV-22042/2020	2020-11-18	North America / USA / Texas / Houston	Human		unknown	unknown	unknown	Original			B.1.139	G	Illumina	ARTIC V3
EPI_ISL_1081959	hCoV-19/Romania/IIsolate3247BLVL/2020	2020-11-24	Europe / Romania / Bucharest	Human		Male	26	Live	Vero	Oropharyngeal swab		B.1.408	G	Illumina MiSeq	Dragen v3.5.7
EPI_ISL_1085013	hCoV-19/Italy/SAR-020/2020	2020-11-11	Europe / Italy / Sardinia	Human		Female	42	Live	Original	Nasopharyngeal swab		B.1.177	GV	Ion Torrent	IRMA, Trinity
EPI_ISL_1085675	hCoV-19/France/un-HMN-20112150074/2020	2020-11-15	Europe / France	Human		Female	85	Hospitalized	Original	Nasopharyngeal swab		B.1.160	GH	Illumina NextSeq500	Illumina DRAGEN COVIDSeq Test Pipeline v.1.2.2
EPI_ISL_1092247	hCoV-19/Germany/BAV-PL-virotum_M1RGX/2020	2020-11-03	Europe / Germany / Bavaria / Munich	Human		Male	78	unknown	Original			B.1.1.70	GR	Illumina HiSeq		Gap of 6 nucleotides when compared to the reference sequence.	info
EPI_ISL_1092316	hCoV-19/Germany/BAV-PL-virotum_T0SAX/2020	2020-11-09	Europe / Germany / Bavaria / Munich	Human		Male	81	unknown	Original			B.1.177	GV	Illumina HiSeq
EPI_ISL_1094648	hCoV-19/USA/KS-CDC-2-3912145/2020	2020-11-30	North America / USA / Kansas	Human		Female	38	unknown	Original	Nasopharyngeal aspirate		B.1.1.222	GR	Illumina	IRMA v0.9.5-beta
EPI_ISL_1094651	hCoV-19/USA/KS-CDC-2-3912235/2020	2020-11-30	North America / USA / Kansas	Human		Male	45	unknown	Original	Nasopharyngeal aspirate		B.1.311	GH	Illumina	IRMA v0.9.5-beta
EPI_ISL_1094652	hCoV-19/USA/KS-CDC-2-3912303/2020	2020-11-29	North America / USA / Kansas	Human		Male	7	unknown	Original	Nasopharyngeal aspirate		B.1.1.222	GR	Illumina	IRMA v0.9.5-beta
EPI_ISL_1095516	hCoV-19/Mexico/CMX-INMEGEN-02-09-18/2020	2020-11-13	North America / Mexico / Mexico City	Human		Female	30	unknown	Original	Oropharyngeal swab		B.1.1.222	GR	Nanopore MinION	MEDAKA
EPI_ISL_1098647	hCoV-19/Australia/NSW1503/2020	2020-11-19	Oceania / Australia / New South Wales / Sydney	Human		unknown	unknown	unknown	Original			B.1.517	GH	Illumina iSeq
EPI_ISL_1098691	hCoV-19/Japan/PG-13081/2020	2020-11-01	Asia / Japan	Human		unknown	unknown	unknown	Original			B.1.1.214	GR	Illumina iSeq	SKESA v. 2.3.0
EPI_ISL_1098692	hCoV-19/Japan/PG-13082/2020	2020-11-01	Asia / Japan	Human		unknown	unknown	unknown	Original			B.1.1.214	GR	Illumina iSeq	A5-miseq v. 20140604
EPI_ISL_1098693	hCoV-19/Japan/PG-13083/2020	2020-11-01	Asia / Japan	Human		unknown	unknown	unknown	Original			B.1.1.214	GR	Illumina iSeq	SKESA v. 2.3.0
EPI_ISL_1098694	hCoV-19/Japan/PG-13084/2020	2020-11-01	Asia / Japan	Human		unknown	unknown	unknown	Original			B.1.1.214	GR	Illumina iSeq	A5-miseq v. 20140604
EPI_ISL_1098695	hCoV-19/Japan/PG-13085/2020	2020-11-01	Asia / Japan	Human		unknown	unknown	unknown	Original			B.1.1.214	GR	Illumina iSeq	SKESA v. 2.3.0
EPI_ISL_1098696	hCoV-19/Japan/PG-13086/2020	2020-11-01	Asia / Japan	Human		unknown	unknown	unknown	Original			B.1.1.214	GR	Illumina iSeq	A5-miseq v. 20140604
EPI_ISL_1098697	hCoV-19/Japan/PG-13087/2020	2020-11-01	Asia / Japan	Human		unknown	unknown	unknown	Original			B.1.1.214	GR	Illumina iSeq	A5-miseq v. 20140604
EPI_ISL_1098698	hCoV-19/Japan/PG-13088/2020	2020-11-01	Asia / Japan	Human		unknown	unknown	unknown	Original			B.1.1.214	GR	Illumina iSeq	A5-miseq v. 20140604
EPI_ISL_1098699	hCoV-19/Japan/PG-13089/2020	2020-11-01	Asia / Japan	Human		unknown	unknown	unknown	Original			B.1.1.214	GR	Illumina iSeq	A5-miseq v. 20140604
EPI_ISL_1098700	hCoV-19/Japan/PG-13090/2020	2020-11-01	Asia / Japan	Human		unknown	unknown	unknown	Original			B.1.1.214	GR	Illumina iSeq	A5-miseq v. 20140604
EPI_ISL_1098701	hCoV-19/Japan/PG-13091/2020	2020-11-01	Asia / Japan	Human		unknown	unknown	unknown	Original			B.1.1.214	GR	Illumina iSeq	A5-miseq v. 20140604
EPI_ISL_1098702	hCoV-19/Japan/PG-13092/2020	2020-11-01	Asia / Japan	Human		unknown	unknown	unknown	Original			B.1.1.284	GR	Illumina iSeq	SKESA v. 2.3.0
EPI_ISL_1098703	hCoV-19/Japan/PG-13093/2020	2020-11-01	Asia / Japan	Human		unknown	unknown	unknown	Original			B.1.1.214	GR	Illumina iSeq	A5-miseq v. 20140604
EPI_ISL_1098704	hCoV-19/Japan/PG-13094/2020	2020-11-01	Asia / Japan	Human		unknown	unknown	unknown	Original			B.1.1.214	GR	Illumina iSeq	A5-miseq v. 20140604
EPI_ISL_1098705	hCoV-19/Japan/PG-13095/2020	2020-11-01	Asia / Japan	Human		unknown	unknown	unknown	Original			B.1.1.214	GR	Illumina iSeq	A5-miseq v. 20140604
EPI_ISL_1098706	hCoV-19/Japan/PG-13096/2020	2020-11-01	Asia / Japan	Human		unknown	unknown	unknown	Original			B.1.1.284	GR	Illumina iSeq	A5-miseq v. 20140604
EPI_ISL_1098707	hCoV-19/Japan/PG-13097/2020	2020-11-01	Asia / Japan	Human		unknown	unknown	unknown	Original			B.1.1.214	GR	Illumina iSeq	SKESA v. 2.3.0
EPI_ISL_1098708	hCoV-19/Japan/PG-13098/2020	2020-11-01	Asia / Japan	Human		unknown	unknown	unknown	Original			B.1.1.214	GR	Illumina iSeq	A5-miseq v. 20140604
EPI_ISL_1098709	hCoV-19/Japan/PG-13099/2020	2020-11-01	Asia / Japan	Human		unknown	unknown	unknown	Original			B.1.1.214	GR	Illumina iSeq	A5-miseq v. 20140604
EPI_ISL_1098710	hCoV-19/Japan/PG-13100/2020	2020-11-01	Asia / Japan	Human		unknown	unknown	unknown	Original			B.1.1.214	GR	Illumina iSeq	SKESA v. 2.3.0
EPI_ISL_1098711	hCoV-19/Japan/PG-13101/2020	2020-11-01	Asia / Japan	Human		unknown	unknown	unknown	Original			B.1.1.297	GR	Illumina iSeq	SKESA v. 2.3.0
EPI_ISL_1098712	hCoV-19/Japan/PG-13102/2020	2020-11-01	Asia / Japan	Human		unknown	unknown	unknown	Original			B.1.1.214	GR	Illumina iSeq	A5-miseq v. 20140604
EPI_ISL_1098713	hCoV-19/Japan/PG-13103/2020	2020-11-01	Asia / Japan	Human		unknown	unknown	unknown	Original			B.1.1.214	GR	Illumina iSeq	SKESA v. 2.3.0
EPI_ISL_1098714	hCoV-19/Japan/PG-13104/2020	2020-11-01	Asia / Japan	Human		unknown	unknown	unknown	Original			B.1.1.214	GR	Illumina iSeq	SKESA v. 2.3.0
EPI_ISL_1098715	hCoV-19/Japan/PG-13105/2020	2020-11-01	Asia / Japan	Human		unknown	unknown	unknown	Original			B.1.1.214	GR	Illumina iSeq	SKESA v. 2.3.0
EPI_ISL_1098716	hCoV-19/Japan/PG-13106/2020	2020-11-01	Asia / Japan	Human		unknown	unknown	unknown	Original			B.1.1.214	GR	Illumina iSeq	A5-miseq v. 20140604
EPI_ISL_1098717	hCoV-19/Japan/PG-13107/2020	2020-11-01	Asia / Japan	Human		unknown	unknown	unknown	Original			B.1.1.214	GR	Illumina iSeq	SKESA v. 2.3.0
EPI_ISL_1098718	hCoV-19/Japan/PG-13108/2020	2020-11-01	Asia / Japan	Human		unknown	unknown	unknown	Original			B.1.1.214	GR	Illumina iSeq	SKESA v. 2.3.0
EPI_ISL_1098719	hCoV-19/Japan/PG-13109/2020	2020-11-01	Asia / Japan	Human		unknown	unknown	unknown	Original			B.1.1.214	GR	Illumina iSeq	SKESA v. 2.3.0
EPI_ISL_1098720	hCoV-19/Japan/PG-13110/2020	2020-11-01	Asia / Japan	Human		unknown	unknown	unknown	Original			B.1.1.214	GR	Illumina iSeq	SKESA v. 2.3.0
EPI_ISL_1098721	hCoV-19/Japan/PG-13111/2020	2020-11-01	Asia / Japan	Human		unknown	unknown	unknown	Original			B.1.1.214	GR	Illumina iSeq	SKESA v. 2.3.0
EPI_ISL_1098722	hCoV-19/Japan/PG-13112/2020	2020-11-01	Asia / Japan	Human		unknown	unknown	unknown	Original			B.1.1.214	GR	Illumina iSeq	SKESA v. 2.3.0
EPI_ISL_1098723	hCoV-19/Japan/PG-13113/2020	2020-11-01	Asia / Japan	Human		unknown	unknown	unknown	Original			B.1.1.214	GR	Illumina iSeq	SKESA v. 2.3.0
EPI_ISL_1098724	hCoV-19/Japan/PG-13114/2020	2020-11-01	Asia / Japan	Human		unknown	unknown	unknown	Original			B.1.1.284	GR	Illumina iSeq	A5-miseq v. 20140604
EPI_ISL_1098725	hCoV-19/Japan/PG-13115/2020	2020-11-01	Asia / Japan	Human		unknown	unknown	unknown	Original			B.1.1.214	GR	Illumina iSeq	A5-miseq v. 20140604
EPI_ISL_1098726	hCoV-19/Japan/PG-13116/2020	2020-11-01	Asia / Japan	Human		unknown	unknown	unknown	Original			B.1.1.214	GR	Illumina iSeq	SKESA v. 2.3.0
EPI_ISL_1098727	hCoV-19/Japan/PG-13117/2020	2020-11-01	Asia / Japan	Human		unknown	unknown	unknown	Original			B.1.1.214	GR	Illumina iSeq	SKESA v. 2.3.0
EPI_ISL_1098728	hCoV-19/Japan/PG-13118/2020	2020-11-01	Asia / Japan	Human		unknown	unknown	unknown	Original			B.1.1.214	GR	Illumina iSeq	SKESA v. 2.3.0
EPI_ISL_1098729	hCoV-19/Japan/PG-13119/2020	2020-11-01	Asia / Japan	Human		unknown	unknown	unknown	Original			B.1.1.214	GR	Illumina iSeq	SKESA v. 2.3.0
EPI_ISL_1098730	hCoV-19/Japan/PG-13120/2020	2020-11-01	Asia / Japan	Human		unknown	unknown	unknown	Original			B.1.1.214	GR	Illumina iSeq	SKESA v. 2.3.0
EPI_ISL_1098731	hCoV-19/Japan/PG-13121/2020	2020-11-01	Asia / Japan	Human		unknown	unknown	unknown	Original			B.1.1.214	GR	Illumina iSeq	SKESA v. 2.3.0
EPI_ISL_1098732	hCoV-19/Japan/PG-13122/2020	2020-11-01	Asia / Japan	Human		unknown	unknown	unknown	Original			B.1.1.214	GR	Illumina iSeq	SKESA v. 2.3.0
EPI_ISL_1098733	hCoV-19/Japan/PG-13123/2020	2020-11-01	Asia / Japan	Human		unknown	unknown	unknown	Original			B.1.1.214	GR	Illumina iSeq	SKESA v. 2.3.0
EPI_ISL_1098734	hCoV-19/Japan/PG-13124/2020	2020-11-01	Asia / Japan	Human		unknown	unknown	unknown	Original			B.1.1.214	GR	Illumina iSeq	A5-miseq v. 20140604
EPI_ISL_1098735	hCoV-19/Japan/PG-14126/2020	2020-11-01	Asia / Japan	Human		unknown	unknown	unknown	Original			B.1.1.214	GR	Illumina iSeq	A5-miseq v. 20140604
EPI_ISL_1098736	hCoV-19/Japan/PG-14127/2020	2020-11-01	Asia / Japan	Human		unknown	unknown	unknown	Original			B.1.1.214	GR	Illumina iSeq	SKESA v. 2.3.0
EPI_ISL_1098737	hCoV-19/Japan/PG-14128/2020	2020-11-01	Asia / Japan	Human		unknown	unknown	unknown	Original			B.1.1.214	GR	Illumina iSeq	A5-miseq v. 20140604
EPI_ISL_1098738	hCoV-19/Japan/PG-14129/2020	2020-11-01	Asia / Japan	Human		unknown	unknown	unknown	Original			B.1.1.214	GR	Illumina iSeq	A5-miseq v. 20140604
EPI_ISL_1098739	hCoV-19/Japan/PG-14130/2020	2020-11-01	Asia / Japan	Human		unknown	unknown	unknown	Original			B.1.1.214	GR	Illumina iSeq	A5-miseq v. 20140604
EPI_ISL_1098740	hCoV-19/Japan/PG-14131/2020	2020-11-01	Asia / Japan	Human		unknown	unknown	unknown	Original			B.1.1.214	GR	Illumina iSeq	SKESA v. 2.3.0
EPI_ISL_1098741	hCoV-19/Japan/PG-14132/2020	2020-11-01	Asia / Japan	Human		unknown	unknown	unknown	Original			B.1.1.214	GR	Illumina iSeq	SKESA v. 2.3.0
EPI_ISL_1098742	hCoV-19/Japan/PG-14133/2020	2020-11-01	Asia / Japan	Human		unknown	unknown	unknown	Original			B.1.1.214	GR	Illumina iSeq	SKESA v. 2.3.0
EPI_ISL_1098743	hCoV-19/Japan/PG-14134/2020	2020-11-01	Asia / Japan	Human		unknown	unknown	unknown	Original			B.1.1.214	GR	Illumina iSeq	A5-miseq v. 20140604
EPI_ISL_1098744	hCoV-19/Japan/PG-14135/2020	2020-11-01	Asia / Japan	Human		unknown	unknown	unknown	Original			B.1.1.214	GR	Illumina iSeq	SKESA v. 2.3.0
EPI_ISL_1098745	hCoV-19/Japan/PG-14136/2020	2020-11-01	Asia / Japan	Human		unknown	unknown	unknown	Original			B.1.1.214	GR	Illumina iSeq	SKESA v. 2.3.0
EPI_ISL_1098746	hCoV-19/Japan/PG-14137/2020	2020-11-01	Asia / Japan	Human		unknown	unknown	unknown	Original			B.1.1.214	GR	Illumina iSeq	SKESA v. 2.3.0
EPI_ISL_1098747	hCoV-19/Japan/PG-14138/2020	2020-11-01	Asia / Japan	Human		unknown	unknown	unknown	Original			B.1.1.214	GR	Illumina iSeq	SKESA v. 2.3.0
EPI_ISL_1098748	hCoV-19/Japan/PG-14139/2020	2020-11-01	Asia / Japan	Human		unknown	unknown	unknown	Original			B.1.1.214	GR	Illumina iSeq	A5-miseq v. 20140604
EPI_ISL_1098749	hCoV-19/Japan/PG-14140/2020	2020-11-01	Asia / Japan	Human		unknown	unknown	unknown	Original			B.1.1.214	GR	Illumina iSeq	SKESA v. 2.3.0
EPI_ISL_1098750	hCoV-19/Japan/PG-14141/2020	2020-11-01	Asia / Japan	Human		unknown	unknown	unknown	Original			B.1.1.214	GR	Illumina iSeq	A5-miseq v. 20140604
EPI_ISL_1098751	hCoV-19/Japan/PG-14142/2020	2020-11-01	Asia / Japan	Human		unknown	unknown	unknown	Original			B.1.1.214	GR	Illumina iSeq	A5-miseq v. 20140604
EPI_ISL_1098752	hCoV-19/Japan/PG-14143/2020	2020-11-01	Asia / Japan	Human		unknown	unknown	unknown	Original			B.1.1.214	GR	Illumina iSeq	SKESA v. 2.3.0
EPI_ISL_1098753	hCoV-19/Japan/PG-14144/2020	2020-11-01	Asia / Japan	Human		unknown	unknown	unknown	Original			B.1.1.214	GR	Illumina iSeq	SKESA v. 2.3.0
EPI_ISL_1104842	hCoV-19/England/LOND-13276CF/2020	2020-11-16	Europe / United Kingdom / England	Human		unknown	unknown	unknown	Original			B.1.36	GH	Illumina		Gap of 3 nucleotides when compared to the reference sequence.	info
EPI_ISL_1104854	hCoV-19/England/LOND-1327832/2020	2020-11-14	Europe / United Kingdom / England	Human		unknown	unknown	unknown	Original			B.1.177	GV	Illumina
EPI_ISL_1104868	hCoV-19/England/LOND-1327A3C/2020	2020-11-18	Europe / United Kingdom / England	Human		unknown	unknown	unknown	Original			B.1.177	GV	Illumina
EPI_ISL_1104869	hCoV-19/England/LOND-1327A4B/2020	2020-11-14	Europe / United Kingdom / England	Human		unknown	unknown	unknown	Original			B.1.177.6	GV	Illumina
EPI_ISL_1104878	hCoV-19/England/LOND-1327B93/2020	2020-11-18	Europe / United Kingdom / England	Human		unknown	unknown	unknown	Original			B.1.1.7	GR	Illumina		NS8_Q27stop results in 78.5% truncation of the protein sequence. Gap of 19 nucleotides when compared to the reference sequence.	info
EPI_ISL_1104883	hCoV-19/England/LOND-1327C45/2020	2020-11-10	Europe / United Kingdom / England	Human		unknown	unknown	unknown	Original			B.1.1.7	GRY	Illumina		NS8_Q27stop results in 78.5% truncation of the protein sequence. Gap of 19 nucleotides when compared to the reference sequence.	info
EPI_ISL_1104895	hCoV-19/England/LOND-1327DBB/2020	2020-11-10	Europe / United Kingdom / England	Human		unknown	unknown	unknown	Original			B.1.177.6	GV	Illumina
EPI_ISL_1104896	hCoV-19/England/LOND-1327DCA/2020	2020-11-15	Europe / United Kingdom / England	Human		unknown	unknown	unknown	Original			B.1.177	GV	Illumina
EPI_ISL_1104897	hCoV-19/England/LOND-1327DD9/2020	2020-11-15	Europe / United Kingdom / England	Human		unknown	unknown	unknown	Original			B.1.1.216	GR	Illumina
EPI_ISL_1104905	hCoV-19/England/LOND-1327E7C/2020	2020-11-13	Europe / United Kingdom / England	Human		unknown	unknown	unknown	Original			B.1.177	GV	Illumina
EPI_ISL_1104914	hCoV-19/England/LOND-1327F3D/2020	2020-11-20	Europe / United Kingdom / England	Human		unknown	unknown	unknown	Original			B.1.1.7	GR	Illumina		NS8_Q27stop results in 78.5% truncation of the protein sequence. Gap of 19 nucleotides when compared to the reference sequence.	info
EPI_ISL_1104923	hCoV-19/England/LOND-1327FF1/2020	2020-11-10	Europe / United Kingdom / England	Human		unknown	unknown	unknown	Original			B.1.36.17	GH	Illumina
EPI_ISL_1104929	hCoV-19/England/LOND-13280DF/2020	2020-11-12	Europe / United Kingdom / England	Human		unknown	unknown	unknown	Original			B.1.1.7	GRY	Illumina		NS8_Q27stop results in 78.5% truncation of the protein sequence. Gap of 19 nucleotides when compared to the reference sequence.	info
EPI_ISL_1104935	hCoV-19/England/LOND-13281DC/2020	2020-11-19	Europe / United Kingdom / England	Human		unknown	unknown	unknown	Original			B.1.1.7	GR	Illumina		NS8_Q27stop results in 78.5% truncation of the protein sequence. Gap of 19 nucleotides when compared to the reference sequence.	info
EPI_ISL_1104941	hCoV-19/England/LOND-132829D/2020	2020-11-25	Europe / United Kingdom / England	Human		unknown	unknown	unknown	Original			B.1.1.216	GR	Illumina
EPI_ISL_1104947	hCoV-19/England/LOND-132835E/2020	2020-11-25	Europe / United Kingdom / England	Human		unknown	unknown	unknown	Original			B.1.1.37	GR	Illumina
EPI_ISL_1104968	hCoV-19/England/LOND-1328673/2020	2020-11-16	Europe / United Kingdom / England	Human		unknown	unknown	unknown	Original			B.1.469	GH	Illumina
EPI_ISL_1109484	hCoV-19/Egypt/MASRI-C4-035/2020	2020-11-19	Africa / Egypt / Cairo	Human	Medany Hospital	Male	47	unknown	Original	Oropharyngeal swab		B.1.1.1	GR	Ion Torrent		NS8_E64stop results in 47.9% truncation of the protein sequence.	info
EPI_ISL_1109485	hCoV-19/Egypt/MASRI-C4-036/2020	2020-11-17	Africa / Egypt / Cairo	Human	Medany Hospital	Male	59	unknown	Original	Oropharyngeal swab		B.1.367	GH	Ion Torrent
EPI_ISL_1109980	hCoV-19/France/PAC-IHU-3384-1/2020	2020-11-24	Europe / France / Marseille	Human		unknown	unknown	unknown	Original	Oropharyngeal swab		B.1.160	GH	Illumina Miseq
EPI_ISL_1110009	hCoV-19/France/PAC-IHU-3418-1/2020	2020-11-06	Europe / France / Marseille	Human		unknown	unknown	unknown	Original	Oropharyngeal swab		B.1.160	GH	Illumina Miseq
EPI_ISL_1110560	hCoV-19/USA/KS-KHEL-0271/2020	2020-11-03	North America / USA / Kansas	Human		Female	24	unknown	Original			B.1.234	G	iSeq	minimap2/ivar
EPI_ISL_1110562	hCoV-19/USA/KS-KHEL-0273/2020	2020-11-04	North America / USA / Kansas	Human		Female	42	unknown	Original			B.1.311	GH	iSeq	minimap2/ivar	Gap of 1 nucleotides when compared to the reference sequence.	info
EPI_ISL_1110565	hCoV-19/USA/KS-KHEL-0281/2020	2020-11-06	North America / USA / Kansas	Human		Female	20	unknown	Original			B.1.234	G	iSeq	minimap2/ivar
EPI_ISL_1110566	hCoV-19/USA/KS-KHEL-0282/2020	2020-11-06	North America / USA / Kansas	Human		Female	74	unknown	Original			B.1.243	G	iSeq	minimap2/ivar	Gap of 21 nucleotides when compared to the reference sequence.	info
EPI_ISL_1110567	hCoV-19/USA/KS-KHEL-0284/2020	2020-11-06	North America / USA / Kansas	Human		Female	49	unknown	Original			B.1.311	GH	iSeq	minimap2/ivar
EPI_ISL_1110569	hCoV-19/USA/KS-KHEL-0289/2020	2020-11-06	North America / USA / Kansas	Human		Female	44	unknown	Original			B.1.509	GH	iSeq	minimap2/ivar	NS8_Q23stop results in 81.8% truncation of the protein sequence.	info
EPI_ISL_1110570	hCoV-19/USA/KS-KHEL-0270/2020	2020-11-03	North America / USA / Kansas	Human		Male	31	unknown	Original			B.1.234	G	iSeq	minimap2/ivar
EPI_ISL_1110571	hCoV-19/USA/KS-KHEL-0274/2020	2020-11-04	North America / USA / Kansas	Human		Male	29	unknown	Original			B.1.509	GH	iSeq	minimap2/ivar	NS8_Q23stop results in 81.8% truncation of the protein sequence.	info
EPI_ISL_1110572	hCoV-19/USA/KS-KHEL-0276/2020	2020-11-04	North America / USA / Kansas	Human		Male	34	unknown	Original			B.1.311	GH	iSeq	minimap2/ivar
EPI_ISL_1110573	hCoV-19/USA/KS-KHEL-0277/2020	2020-11-04	North America / USA / Kansas	Human		Male	18	unknown	Original			B.1.1.222	GR	iSeq	minimap2/ivar
EPI_ISL_1110574	hCoV-19/USA/KS-KHEL-0278/2020	2020-11-05	North America / USA / Kansas	Human		Male	52	unknown	Original			B.1.2	GH	iSeq	minimap2/ivar
EPI_ISL_1110575	hCoV-19/USA/KS-KHEL-0280/2020	2020-11-05	North America / USA / Kansas	Human		Male	55	unknown	Original			B.1.2	GH	iSeq	minimap2/ivar	Gap of 1 nucleotides when compared to the reference sequence.	info
EPI_ISL_1110577	hCoV-19/USA/KS-KHEL-0285/2020	2020-11-06	North America / USA / Kansas	Human		Male	17	unknown	Original			B.1.509	GH	iSeq	minimap2/ivar	NS8_Q23stop results in 81.8% truncation of the protein sequence. Gap of 3 nucleotides when compared to the reference sequence.	info
EPI_ISL_1110578	hCoV-19/USA/KS-KHEL-0286/2020	2020-11-06	North America / USA / Kansas	Human		Male	15	unknown	Original			B.1.2	GH	iSeq	minimap2/ivar
EPI_ISL_1110579	hCoV-19/USA/KS-KHEL-0287/2020	2020-11-06	North America / USA / Kansas	Human		Male	20	unknown	Original			B.1.509	GH	iSeq	minimap2/ivar	NS8_Q23stop results in 81.8% truncation of the protein sequence.	info
EPI_ISL_1111309	hCoV-19/Peru/LIM-INS-411/2020	2020-11-03	South America / Peru / Lima	Human		9	unknown	Oropharyngeal swab	Original			C.14	GR	Illumina MiSeq	Geneious 10.2.4
EPI_ISL_1111312	hCoV-19/Peru/LIM-INS-414/2020	2020-11-30	South America / Peru / Lima	Human		44	unknown	Oropharyngeal swab	Original			B.1.205	G	Illumina MiSeq	Geneious 10.2.4
EPI_ISL_1111594	hCoV-19/USA/VA-DCLS-3016/2020	2020-11-23	North America / USA / Virginia	Human		unknown	unknown	unknown	Origin			B.1.1.207	GR	Illumina MiSeq	minimap2/ivar	NS6_Q56stop results in 9.8% truncation of the protein sequence.	info
EPI_ISL_1111595	hCoV-19/USA/VA-DCLS-3017/2020	2020-11-30	North America / USA / Virginia	Human		unknown	unknown	unknown	Origin			B.1	GH	Illumina MiSeq	minimap2/ivar	Gap of 10 nucleotides when compared to the reference sequence.	info
EPI_ISL_1113719	hCoV-19/USA/NM-DOH-2020490644/2020	2020-11-05	North America / USA / New Mexico	Human		Female	35	unknown	Original	Nasopharyngeal swab		B.1.1.85	GR	Illumina MiSeq	bwa v. 0.7.17-r1188/ivar v. 1.2.2
EPI_ISL_1113722	hCoV-19/USA/NM-DOH-2020491523/2020	2020-11-05	North America / USA / New Mexico	Human		Female	51	unknown	Original	Nasopharyngeal swab		B.1.1.85	GR	Illumina MiSeq	bwa v. 0.7.17-r1188/ivar v. 1.2.2
EPI_ISL_1113724	hCoV-19/USA/NM-DOH-2020491674/2020	2020-11-05	North America / USA / New Mexico	Human		Female	27	unknown	Original	Nasopharyngeal swab		B.1.346	GH	Illumina MiSeq	bwa v. 0.7.17-r1188/ivar v. 1.2.2
EPI_ISL_1113725	hCoV-19/USA/NM-DOH-2020491833/2020	2020-11-05	North America / USA / New Mexico	Human		Male	75	unknown	Original	Nasopharyngeal swab		B.1.346	GH	Illumina MiSeq	bwa v. 0.7.17-r1188/ivar v. 1.2.2
EPI_ISL_1113726	hCoV-19/USA/NM-DOH-2020491975/2020	2020-11-05	North America / USA / New Mexico	Human		Male	12	unknown	Original	Nasopharyngeal swab		B.1.1.29	GR	Illumina MiSeq	bwa v. 0.7.17-r1188/ivar v. 1.2.2
EPI_ISL_1113730	hCoV-19/USA/NM-DOH-2020492571/2020	2020-11-05	North America / USA / New Mexico	Human		Female	45	unknown	Original	Nasopharyngeal swab		B.1.2	GH	Illumina MiSeq	bwa v. 0.7.17-r1188/ivar v. 1.2.2
EPI_ISL_1113734	hCoV-19/USA/NM-DOH-2020496083/2020	2020-11-05	North America / USA / New Mexico	Human		Female	58	unknown	Original	Nasopharyngeal swab		B.1.1.222	GR	Illumina MiSeq	bwa v. 0.7.17-r1188/ivar v. 1.2.2
EPI_ISL_1113735	hCoV-19/USA/NM-DOH-2020496130/2020	2020-11-05	North America / USA / New Mexico	Human		Female	43	unknown	Original	Nasopharyngeal swab		B.1.1.85	GR	Illumina MiSeq	bwa v. 0.7.17-r1188/ivar v. 1.2.2
EPI_ISL_1113739	hCoV-19/USA/NM-DOH-2020503177/2020	2020-11-09	North America / USA / New Mexico	Human		Female	20	unknown	Original	Nasopharyngeal swab		B.1.2	GH	Illumina MiSeq	bwa v. 0.7.17-r1188/ivar v. 1.2.2
EPI_ISL_1113742	hCoV-19/USA/NM-DOH-2020504074/2020	2020-11-09	North America / USA / New Mexico	Human		Female	55	unknown	Original	Nasopharyngeal swab		B.1.1.130	GR	Illumina MiSeq	bwa v. 0.7.17-r1188/ivar v. 1.2.2
EPI_ISL_1113743	hCoV-19/USA/NM-DOH-2020504436/2020	2020-11-09	North America / USA / New Mexico	Human		Male	55	unknown	Original	Nasopharyngeal swab		B.1.2	GH	Illumina MiSeq	bwa v. 0.7.17-r1188/ivar v. 1.2.2
EPI_ISL_1113748	hCoV-19/USA/NM-DOH-2020505202/2020	2020-11-09	North America / USA / New Mexico	Human		Male	14	unknown	Original	Nasopharyngeal swab		B.1.2	GH	Illumina MiSeq	bwa v. 0.7.17-r1188/ivar v. 1.2.2
EPI_ISL_1113749	hCoV-19/USA/NM-DOH-2020507072/2020	2020-11-09	North America / USA / New Mexico	Human		Female	39	unknown	Original	Nasopharyngeal swab		B.1.2	GH	Illumina MiSeq	bwa v. 0.7.17-r1188/ivar v. 1.2.2
EPI_ISL_1113753	hCoV-19/USA/NM-DOH-2020512010/2020	2020-11-10	North America / USA / New Mexico	Human		Female	53	unknown	Original	Nasopharyngeal swab		B.1.2	GH	Illumina MiSeq	bwa v. 0.7.17-r1188/ivar v. 1.2.2
EPI_ISL_1114726	hCoV-19/Malaysia/IMR_WC299920/2020	2020-11-27	Asia / Malaysia	Human		Male	32	Live	Original			B.1.1	GR	Illumina NextSeq 500
EPI_ISL_1117451	hCoV-19/Indonesia/BGR-LIPI041/2020	2020-11-09	Asia / Indonesia / Jawa Barat / Bogor	Human		Female	33	unknown	Original	Nasopharyngeal and oropharyngeal swab		B.1.1.29	GR	Nanopore MinION		Gap of 1 nucleotide(s) found at refpos 11083 (frameshift confirmed by the submitter).	info
EPI_ISL_1118719	hCoV-19/USA/MI-UM-10037128409/2020	2020-11-25	North America / USA / Michigan	Human		unknown	unknown	unknown	Original			B.1.369	GH	Illumina MiSeq	BWA-MEM, iVar	Gap of 3 nucleotides when compared to the reference sequence.	info
EPI_ISL_1118722	hCoV-19/USA/MI-UM-10037078904/2020	2020-11-23	North America / USA / Michigan	Human		unknown	unknown	unknown	Original			B.1.2	GH	Illumina MiSeq	BWA-MEM, iVar
EPI_ISL_1118724	hCoV-19/USA/MI-UM-10037079335/2020	2020-11-23	North America / USA / Michigan	Human		unknown	unknown	unknown	Original			B.1.2	GH	Illumina MiSeq	BWA-MEM, iVar
EPI_ISL_1118725	hCoV-19/USA/MI-UM-10037082058/2020	2020-11-23	North America / USA / Michigan	Human		unknown	unknown	unknown	Original			B.1.448	GH	Illumina MiSeq	BWA-MEM, iVar
EPI_ISL_1118726	hCoV-19/USA/MI-UM-10037080699/2020	2020-11-23	North America / USA / Michigan	Human		unknown	unknown	unknown	Original			B.1.2	GH	Illumina MiSeq	BWA-MEM, iVar
EPI_ISL_1118730	hCoV-19/USA/MI-UM-10037082447/2020	2020-11-23	North America / USA / Michigan	Human		unknown	unknown	unknown	Original			B.1.2	GH	Illumina MiSeq	BWA-MEM, iVar
EPI_ISL_1118731	hCoV-19/USA/MI-UM-10037088837/2020	2020-11-23	North America / USA / Michigan	Human		unknown	unknown	unknown	Original			B.1.2	GH	Illumina MiSeq	BWA-MEM, iVar
EPI_ISL_1118732	hCoV-19/USA/MI-UM-10037081006/2020	2020-11-23	North America / USA / Michigan	Human		unknown	unknown	unknown	Original			B.1.2	GH	Illumina MiSeq	BWA-MEM, iVar
EPI_ISL_1118735	hCoV-19/USA/MI-UM-10037079815/2020	2020-11-23	North America / USA / Michigan	Human		unknown	unknown	unknown	Original			B.1.369	GH	Illumina MiSeq	BWA-MEM, iVar
EPI_ISL_1118736	hCoV-19/USA/MI-UM-10037088228/2020	2020-11-23	North America / USA / Michigan	Human		unknown	unknown	unknown	Original			B.1.2	GH	Illumina MiSeq	BWA-MEM, iVar
EPI_ISL_1118737	hCoV-19/USA/MI-UM-10037087706/2020	2020-11-23	North America / USA / Michigan	Human		unknown	unknown	unknown	Original			B.1.2	GH	Illumina MiSeq	BWA-MEM, iVar
EPI_ISL_1118749	hCoV-19/USA/MI-UM-10037108182/2020	2020-11-24	North America / USA / Michigan	Human		unknown	unknown	unknown	Original			B.1.2	GH	Illumina MiSeq	BWA-MEM, iVar
EPI_ISL_1118751	hCoV-19/USA/MI-UM-10037109411/2020	2020-11-24	North America / USA / Michigan	Human		unknown	unknown	unknown	Original			B.1.2	GH	Illumina MiSeq	BWA-MEM, iVar
EPI_ISL_1118753	hCoV-19/USA/MI-UM-10037107774/2020	2020-11-24	North America / USA / Michigan	Human		unknown	unknown	unknown	Original			B.1.2	GH	Illumina MiSeq	BWA-MEM, iVar
EPI_ISL_1118755	hCoV-19/USA/MI-UM-10037106578/2020	2020-11-24	North America / USA / Michigan	Human		unknown	unknown	unknown	Original			B.1.2	GH	Illumina MiSeq	BWA-MEM, iVar
EPI_ISL_1118756	hCoV-19/USA/MI-UM-10037098916/2020	2020-11-24	North America / USA / Michigan	Human		unknown	unknown	unknown	Original			B.1.2	GH	Illumina MiSeq	BWA-MEM, iVar
EPI_ISL_1118759	hCoV-19/USA/MI-UM-10037098206/2020	2020-11-24	North America / USA / Michigan	Human		unknown	unknown	unknown	Original			B.1.2	GH	Illumina MiSeq	BWA-MEM, iVar
EPI_ISL_1118764	hCoV-19/USA/MI-UM-10037110761/2020	2020-11-24	North America / USA / Michigan	Human		unknown	unknown	unknown	Original			B.1.2	GH	Illumina MiSeq	BWA-MEM, iVar
EPI_ISL_1118768	hCoV-19/USA/MI-UM-10037098183/2020	2020-11-24	North America / USA / Michigan	Human		unknown	unknown	unknown	Original			B.1.2	GH	Illumina MiSeq	BWA-MEM, iVar
EPI_ISL_1118771	hCoV-19/USA/MI-UM-10037097521/2020	2020-11-24	North America / USA / Michigan	Human		unknown	unknown	unknown	Original			B.1.234	G	Illumina MiSeq	BWA-MEM, iVar
EPI_ISL_1118773	hCoV-19/USA/MI-UM-10037109341/2020	2020-11-24	North America / USA / Michigan	Human		unknown	unknown	unknown	Original			B.1.2	GH	Illumina MiSeq	BWA-MEM, iVar
EPI_ISL_1118774	hCoV-19/USA/MI-UM-10037128574/2020	2020-11-25	North America / USA / Michigan	Human		unknown	unknown	unknown	Original			B.1.2	GH	Illumina MiSeq	BWA-MEM, iVar
EPI_ISL_1118777	hCoV-19/USA/MI-UM-10037102340/2020	2020-11-24	North America / USA / Michigan	Human		unknown	unknown	unknown	Original			B.1.2	GH	Illumina MiSeq	BWA-MEM, iVar
EPI_ISL_1118780	hCoV-19/USA/MI-UM-10037101888/2020	2020-11-24	North America / USA / Michigan	Human		unknown	unknown	unknown	Original			B.1.234	G	Illumina MiSeq	BWA-MEM, iVar
EPI_ISL_1118781	hCoV-19/USA/MI-UM-10037098433/2020	2020-11-24	North America / USA / Michigan	Human		unknown	unknown	unknown	Original			B.1.2	GH	Illumina MiSeq	BWA-MEM, iVar
EPI_ISL_1118782	hCoV-19/USA/MI-UM-10037102772/2020	2020-11-24	North America / USA / Michigan	Human		unknown	unknown	unknown	Original			B.1.2	GH	Illumina MiSeq	BWA-MEM, iVar
EPI_ISL_1118783	hCoV-19/USA/MI-UM-10037101624/2020	2020-11-24	North America / USA / Michigan	Human		unknown	unknown	unknown	Original			B.1.2	GH	Illumina MiSeq	BWA-MEM, iVar
EPI_ISL_1118787	hCoV-19/USA/MI-UM-10037122166/2020	2020-11-25	North America / USA / Michigan	Human		unknown	unknown	unknown	Original			B.1.2	GH	Illumina MiSeq	BWA-MEM, iVar
EPI_ISL_1118789	hCoV-19/USA/MI-UM-10037110304/2020	2020-11-24	North America / USA / Michigan	Human		unknown	unknown	unknown	Original			B.1.2	GH	Illumina MiSeq	BWA-MEM, iVar
EPI_ISL_1118790	hCoV-19/USA/MI-UM-10037122971/2020	2020-11-25	North America / USA / Michigan	Human		unknown	unknown	unknown	Original			B.1.2	GH	Illumina MiSeq	BWA-MEM, iVar
EPI_ISL_1118791	hCoV-19/USA/MI-UM-10037121839/2020	2020-11-25	North America / USA / Michigan	Human		unknown	unknown	unknown	Original			B.1	G	Illumina MiSeq	BWA-MEM, iVar
EPI_ISL_1118793	hCoV-19/USA/MI-UM-10037128673/2020	2020-11-25	North America / USA / Michigan	Human		unknown	unknown	unknown	Original			B.1.2	GH	Illumina MiSeq	BWA-MEM, iVar
EPI_ISL_1118794	hCoV-19/USA/MI-UM-10037126862/2020	2020-11-25	North America / USA / Michigan	Human		unknown	unknown	unknown	Original			B.1.2	GH	Illumina MiSeq	BWA-MEM, iVar
EPI_ISL_1118795	hCoV-19/USA/MI-UM-10037122407/2020	2020-11-25	North America / USA / Michigan	Human		unknown	unknown	unknown	Original			B.1.2	GH	Illumina MiSeq	BWA-MEM, iVar
EPI_ISL_1118796	hCoV-19/USA/MI-UM-10037125735/2020	2020-11-25	North America / USA / Michigan	Human		unknown	unknown	unknown	Original			B.1.2	GH	Illumina MiSeq	BWA-MEM, iVar
EPI_ISL_1118797	hCoV-19/USA/MI-UM-10037118030/2020	2020-11-25	North America / USA / Michigan	Human		unknown	unknown	unknown	Original			B.1.361	GH	Illumina MiSeq	BWA-MEM, iVar
EPI_ISL_1118800	hCoV-19/USA/MI-UM-10037118978/2020	2020-11-25	North America / USA / Michigan	Human		unknown	unknown	unknown	Original			B.1.2	GH	Illumina MiSeq	BWA-MEM, iVar
EPI_ISL_1118804	hCoV-19/USA/MI-UM-10037125980/2020	2020-11-25	North America / USA / Michigan	Human		unknown	unknown	unknown	Original			B.1.2	GH	Illumina MiSeq	BWA-MEM, iVar
EPI_ISL_1118806	hCoV-19/USA/MI-UM-10037117888/2020	2020-11-25	North America / USA / Michigan	Human		unknown	unknown	unknown	Original			B.1.2	GH	Illumina MiSeq	BWA-MEM, iVar
EPI_ISL_1118811	hCoV-19/USA/MI-UM-10037125793/2020	2020-11-25	North America / USA / Michigan	Human		unknown	unknown	unknown	Original			B.1.361	GH	Illumina MiSeq	BWA-MEM, iVar
EPI_ISL_1118812	hCoV-19/USA/MI-UM-10037126554/2020	2020-11-25	North America / USA / Michigan	Human		unknown	unknown	unknown	Original			B.1.361	GH	Illumina MiSeq	BWA-MEM, iVar
EPI_ISL_1118814	hCoV-19/USA/MI-UM-10037127915/2020	2020-11-25	North America / USA / Michigan	Human		unknown	unknown	unknown	Original			B.1.361	GH	Illumina MiSeq	BWA-MEM, iVar
EPI_ISL_1118815	hCoV-19/USA/MI-UM-10037125113/2020	2020-11-25	North America / USA / Michigan	Human		unknown	unknown	unknown	Original			B.1.2	GH	Illumina MiSeq	BWA-MEM, iVar
EPI_ISL_1118816	hCoV-19/USA/MI-UM-10037126142/2020	2020-11-25	North America / USA / Michigan	Human		unknown	unknown	unknown	Original			B.1.437	GH	Illumina MiSeq	BWA-MEM, iVar
EPI_ISL_1118817	hCoV-19/USA/MI-UM-10037126686/2020	2020-11-25	North America / USA / Michigan	Human		unknown	unknown	unknown	Original			B.1.2	GH	Illumina MiSeq	BWA-MEM, iVar
EPI_ISL_1119042	hCoV-19/Switzerland/BE-ETHZ-500085/2020	2020-11-09	Europe / Switzerland / Bern	Human		unknown	unknown	unknown	Original	Nasopharyngeal and oropharyngeal swab		B.1.1.7	GRY	Illumina	V-pipe	NS8_Q27stop results in 78.5% truncation of the protein sequence. Gap of 19 nucleotides when compared to the reference sequence.	info
EPI_ISL_1119043	hCoV-19/Switzerland/NE-ETHZ-500073/2020	2020-11-09	Europe / Switzerland / Neuchatel	Human		unknown	unknown	unknown	Original	Nasopharyngeal and oropharyngeal swab		B.1.1.7	GRY	Illumina	V-pipe	NS8_Q27stop results in 78.5% truncation of the protein sequence. Gap of 19 nucleotides when compared to the reference sequence.	info
EPI_ISL_1119044	hCoV-19/Switzerland/NE-ETHZ-500068/2020	2020-11-09	Europe / Switzerland / Neuchatel	Human		unknown	unknown	unknown	Original	Nasopharyngeal and oropharyngeal swab		B.1.1.7	GRY	Illumina	V-pipe	NS8_Q27stop results in 78.5% truncation of the protein sequence. Gap of 19 nucleotides when compared to the reference sequence.	info
EPI_ISL_1119045	hCoV-19/Switzerland/ZH-ETHZ-500087/2020	2020-11-09	Europe / Switzerland / Zurich	Human		unknown	unknown	unknown	Original	Nasopharyngeal and oropharyngeal swab		B.1.1.7	GR	Illumina	V-pipe	NS8_Q27stop results in 78.5% truncation of the protein sequence. Gap of 19 nucleotides when compared to the reference sequence.	info
EPI_ISL_1119046	hCoV-19/Switzerland/ZH-ETHZ-500088/2020	2020-11-09	Europe / Switzerland / Zurich	Human		unknown	unknown	unknown	Original	Nasopharyngeal and oropharyngeal swab		B.1.1.7	GR	Illumina	V-pipe	NS8_Q27stop results in 78.5% truncation of the protein sequence. Gap of 19 nucleotides when compared to the reference sequence.	info
EPI_ISL_1119047	hCoV-19/Switzerland/ZH-ETHZ-500086/2020	2020-11-09	Europe / Switzerland / Zurich	Human		unknown	unknown	unknown	Original	Nasopharyngeal and oropharyngeal swab		B.1.1.7	GRY	Illumina	V-pipe	NS8_Q27stop results in 78.5% truncation of the protein sequence. Gap of 19 nucleotides when compared to the reference sequence.	info
EPI_ISL_1119049	hCoV-19/Switzerland/BE-ETHZ-500102/2020	2020-11-12	Europe / Switzerland / Bern	Human		unknown	unknown	unknown	Original	Nasopharyngeal and oropharyngeal swab		B.1.1.7	GR	Illumina	V-pipe	NS8_Q27stop results in 78.5% truncation of the protein sequence. Gap of 19 nucleotides when compared to the reference sequence.	info
EPI_ISL_1119050	hCoV-19/Switzerland/BE-ETHZ-500089/2020	2020-11-12	Europe / Switzerland / Bern	Human		unknown	unknown	unknown	Original	Nasopharyngeal and oropharyngeal swab		B.1.1.7	GRY	Illumina	V-pipe	NS8_Q27stop results in 78.5% truncation of the protein sequence. Gap of 19 nucleotides when compared to the reference sequence.	info
EPI_ISL_1119202	hCoV-19/Switzerland/BE-ETHZ-500077/2020	2020-11-09	Europe / Switzerland / Bern	Human		unknown	unknown	unknown	Original	Nasopharyngeal and oropharyngeal swab		B.1.1.7	GRY	Illumina	V-pipe	NS8_K68stop results in 44.6% truncation of the protein sequence. NS8_Q27stop results in 78.5% truncation of the protein sequence. Gap of 19 nucleotides when compared to the reference sequence.	info
EPI_ISL_1119222	hCoV-19/Switzerland/BE-ETHZ-500127/2020	2020-11-12	Europe / Switzerland / Bern	Human		unknown	unknown	unknown	Original	Nasopharyngeal and oropharyngeal swab		B.1.258.17	G	Illumina	V-pipe	NS8_E64stop results in 47.9% truncation of the protein sequence. Gap of 6 nucleotides when compared to the reference sequence.	info
EPI_ISL_1119234	hCoV-19/Switzerland/NE-ETHZ-501297/2020	2020-11-08	Europe / Switzerland / Neuchatel	Human		unknown	unknown	unknown	Original	Nasopharyngeal and oropharyngeal swab		B.1.1.105	GR	Illumina	V-pipe	NS8_E59stop results in 52.1% truncation of the protein sequence. Gap of 6 nucleotides when compared to the reference sequence.	info
EPI_ISL_1119235	hCoV-19/Switzerland/NE-ETHZ-501296/2020	2020-11-08	Europe / Switzerland / Neuchatel	Human		unknown	unknown	unknown	Original	Nasopharyngeal and oropharyngeal swab		B.1.1.105	GR	Illumina	V-pipe	NS8_E59stop results in 52.1% truncation of the protein sequence. Gap of 6 nucleotides when compared to the reference sequence.	info
EPI_ISL_1119236	hCoV-19/Switzerland/SO-ETHZ-501035/2020	2020-11-04	Europe / Switzerland / Solothurn	Human		unknown	unknown	unknown	Original	Nasopharyngeal and oropharyngeal swab		B.1.177	GV	Illumina	V-pipe	NS8_E106stop results in 13.2% truncation of the protein sequence.	info
EPI_ISL_1119238	hCoV-19/Switzerland/GE-ETHZ-500100/2020	2020-11-12	Europe / Switzerland / Geneva	Human		unknown	unknown	unknown	Original	Nasopharyngeal and oropharyngeal swab		B.1.177	GV	Illumina	V-pipe	NS8_E106stop results in 13.2% truncation of the protein sequence.	info
EPI_ISL_1119244	hCoV-19/Switzerland/BE-ETHZ-500026/2020	2020-11-02	Europe / Switzerland / Bern	Human		unknown	unknown	unknown	Original	Nasopharyngeal and oropharyngeal swab		B.1.36.17	GH	Illumina	V-pipe	NS7b_E33stop results in 25.6% truncation of the protein sequence.	info
EPI_ISL_1119340	hCoV-19/Switzerland/BL-ETHZ-500923/2020	2020-11-02	Europe / Switzerland / Basel-Landschaft	Human		unknown	unknown	unknown	Original	Nasopharyngeal and oropharyngeal swab		B.1.221	G	Illumina	V-pipe	Gap of 9 nucleotides when compared to the reference sequence.	info
EPI_ISL_1119348	hCoV-19/Switzerland/BE-ETHZ-500964/2020	2020-11-02	Europe / Switzerland / Bern	Human		unknown	unknown	unknown	Original	Nasopharyngeal and oropharyngeal swab		B.1.1.130	GR	Illumina	V-pipe	Gap of 6 nucleotides when compared to the reference sequence.	info
EPI_ISL_1119351	hCoV-19/Switzerland/SO-ETHZ-500153/2020	2020-11-12	Europe / Switzerland / Solothurn	Human		unknown	unknown	unknown	Original	Nasopharyngeal and oropharyngeal swab		B.1.258	G	Illumina	V-pipe	Gap of 6 nucleotides when compared to the reference sequence.	info
EPI_ISL_1119367	hCoV-19/Switzerland/BL-ETHZ-501396/2020	2020-11-09	Europe / Switzerland / Basel-Landschaft	Human		unknown	unknown	unknown	Original	Nasopharyngeal and oropharyngeal swab		B.1.160	GH	Illumina	V-pipe	Gap of 4 nucleotide(s) found at refpos 26158 (frameshift confirmed by the submitter). NS3 without BLAST coverage.	info
EPI_ISL_1119370	hCoV-19/Switzerland/BL-ETHZ-500043/2020	2020-11-04	Europe / Switzerland / Basel-Landschaft	Human		unknown	unknown	unknown	Original	Nasopharyngeal and oropharyngeal swab		B.1.177	GV	Illumina	V-pipe	Gap of 3 nucleotides when compared to the reference sequence.	info
EPI_ISL_1119371	hCoV-19/Switzerland/BL-ETHZ-501127/2020	2020-11-07	Europe / Switzerland / Basel-Landschaft	Human		unknown	unknown	unknown	Original	Nasopharyngeal and oropharyngeal swab		B.1.1.155	GR	Illumina	V-pipe	Gap of 3 nucleotides when compared to the reference sequence.	info
EPI_ISL_1119372	hCoV-19/Switzerland/BL-ETHZ-501125/2020	2020-11-07	Europe / Switzerland / Basel-Landschaft	Human		unknown	unknown	unknown	Original	Nasopharyngeal and oropharyngeal swab		B.1.1.155	GR	Illumina	V-pipe	Gap of 3 nucleotides when compared to the reference sequence.	info
EPI_ISL_1119374	hCoV-19/Switzerland/VS-ETHZ-500143/2020	2020-11-12	Europe / Switzerland / Valais	Human		unknown	unknown	unknown	Original	Nasopharyngeal and oropharyngeal swab		B.1.177	GV	Illumina	V-pipe	Gap of 3 nucleotides when compared to the reference sequence.	info
EPI_ISL_1119377	hCoV-19/Switzerland/FR-ETHZ-501330/2020	2020-11-09	Europe / Switzerland / Fribourg	Human		unknown	unknown	unknown	Original	Nasopharyngeal and oropharyngeal swab		B.1.160	GH	Illumina	V-pipe	Gap of 25 nucleotide(s) found at refpos 27555 (frameshift confirmed by the submitter).	info
EPI_ISL_1119379	hCoV-19/Switzerland/GE-ETHZ-501070/2020	2020-11-06	Europe / Switzerland / Geneva	Human		unknown	unknown	unknown	Original	Nasopharyngeal and oropharyngeal swab		B.1.1.39	GR	Illumina	V-pipe	Gap of 23 nucleotides when compared to the reference sequence.	info
EPI_ISL_1119380	hCoV-19/Switzerland/BE-ETHZ-501205/2020	2020-11-07	Europe / Switzerland / Bern	Human		unknown	unknown	unknown	Original	Nasopharyngeal and oropharyngeal swab		B.1.177	GV	Illumina	V-pipe	Gap of 23 nucleotides when compared to the reference sequence.	info
EPI_ISL_1119381	hCoV-19/Switzerland/BS-ETHZ-501322/2020	2020-11-08	Europe / Switzerland / Basel-Stadt	Human		unknown	unknown	unknown	Original	Nasopharyngeal and oropharyngeal swab		B.1.1.39	GR	Illumina	V-pipe	Gap of 23 nucleotides when compared to the reference sequence.	info
EPI_ISL_1119402	hCoV-19/Switzerland/SH-ETHZ-501087/2020	2020-11-09	Europe / Switzerland / Schaffhausen	Human		unknown	unknown	unknown	Original	Nasopharyngeal and oropharyngeal swab		B.1.1.241	GR	Illumina	V-pipe	Gap of 2 nucleotide(s) found at refpos 27720 (frameshift confirmed by the submitter).	info
EPI_ISL_1119404	hCoV-19/Switzerland/ZH-ETHZ-501464/2020	2020-11-09	Europe / Switzerland / Zurich	Human		unknown	unknown	unknown	Original	Nasopharyngeal and oropharyngeal swab		B.1.1.39	GR	Illumina	V-pipe	Gap of 2 nucleotide(s) found at refpos 25473 (frameshift confirmed by the submitter).	info
EPI_ISL_1119412	hCoV-19/Switzerland/ZH-ETHZ-500982/2020	2020-11-04	Europe / Switzerland / Zurich	Human		unknown	unknown	unknown	Original	Nasopharyngeal and oropharyngeal swab		B.1.1	GR	Illumina	V-pipe	Gap of 12 nucleotides when compared to the reference sequence.	info
EPI_ISL_1119427	hCoV-19/Switzerland/SO-ETHZ-500952/2020	2020-11-02	Europe / Switzerland / Solothurn	Human		unknown	unknown	unknown	Original	Nasopharyngeal and oropharyngeal swab		B.1.160	GH	Illumina	V-pipe	Gap of 10 nucleotide(s) found at refpos 27376 (frameshift confirmed by the submitter).	info
EPI_ISL_1119451	hCoV-19/Switzerland/SO-ETHZ-501187/2020	2020-11-07	Europe / Switzerland / Solothurn	Human		unknown	unknown	unknown	Original	Nasopharyngeal and oropharyngeal swab		B.1.1.208	GR	Illumina	V-pipe	Gap of 1 nucleotide(s) found at refpos 27870 (frameshift confirmed by the submitter).	info
EPI_ISL_1119453	hCoV-19/Switzerland/BL-ETHZ-501049/2020	2020-11-04	Europe / Switzerland / Basel-Landschaft	Human		unknown	unknown	unknown	Original	Nasopharyngeal and oropharyngeal swab		B.1.36	GH	Illumina	V-pipe	Gap of 1 nucleotide(s) found at refpos 26161 (frameshift confirmed by the submitter). NS3 without BLAST coverage.	info
EPI_ISL_1119456	hCoV-19/Switzerland/AG-ETHZ-500022/2020	2020-11-02	Europe / Switzerland / Aargau	Human		unknown	unknown	unknown	Original	Nasopharyngeal and oropharyngeal swab		B.1.177	GV	Illumina	V-pipe
EPI_ISL_1119457	hCoV-19/Switzerland/AG-ETHZ-500886/2020	2020-11-02	Europe / Switzerland / Aargau	Human		unknown	unknown	unknown	Original	Nasopharyngeal and oropharyngeal swab		B.1.1.39	GR	Illumina	V-pipe
EPI_ISL_1119458	hCoV-19/Switzerland/AG-ETHZ-500950/2020	2020-11-02	Europe / Switzerland / Aargau	Human		unknown	unknown	unknown	Original	Nasopharyngeal and oropharyngeal swab		B.1.177.23	GV	Illumina	V-pipe
EPI_ISL_1119459	hCoV-19/Switzerland/AG-ETHZ-500961/2020	2020-11-02	Europe / Switzerland / Aargau	Human		unknown	unknown	unknown	Original	Nasopharyngeal and oropharyngeal swab		B.1.177	GV	Illumina	V-pipe
EPI_ISL_1119461	hCoV-19/Switzerland/BE-ETHZ-500951/2020	2020-11-02	Europe / Switzerland / Bern	Human		unknown	unknown	unknown	Original	Nasopharyngeal and oropharyngeal swab		B.1.160	GH	Illumina	V-pipe
EPI_ISL_1119462	hCoV-19/Switzerland/BE-ETHZ-500037/2020	2020-11-02	Europe / Switzerland / Bern	Human		unknown	unknown	unknown	Original	Nasopharyngeal and oropharyngeal swab		B.1.416.1	G	Illumina	V-pipe
EPI_ISL_1119463	hCoV-19/Switzerland/BE-ETHZ-500005/2020	2020-11-02	Europe / Switzerland / Bern	Human		unknown	unknown	unknown	Original	Nasopharyngeal and oropharyngeal swab		B.1.160	GH	Illumina	V-pipe
EPI_ISL_1119464	hCoV-19/Switzerland/BE-ETHZ-500030/2020	2020-11-02	Europe / Switzerland / Bern	Human		unknown	unknown	unknown	Original	Nasopharyngeal and oropharyngeal swab		B.1.177	GV	Illumina	V-pipe
EPI_ISL_1119466	hCoV-19/Switzerland/BE-ETHZ-500936/2020	2020-11-02	Europe / Switzerland / Bern	Human		unknown	unknown	unknown	Original	Nasopharyngeal and oropharyngeal swab		B.1.177	GV	Illumina	V-pipe
EPI_ISL_1119467	hCoV-19/Switzerland/BE-ETHZ-500885/2020	2020-11-02	Europe / Switzerland / Bern	Human		unknown	unknown	unknown	Original	Nasopharyngeal and oropharyngeal swab		B.1.177	GV	Illumina	V-pipe
EPI_ISL_1119468	hCoV-19/Switzerland/BE-ETHZ-500034/2020	2020-11-02	Europe / Switzerland / Bern	Human		unknown	unknown	unknown	Original	Nasopharyngeal and oropharyngeal swab		B.1.160	GH	Illumina	V-pipe
EPI_ISL_1119473	hCoV-19/Switzerland/BE-ETHZ-500881/2020	2020-11-02	Europe / Switzerland / Bern	Human		unknown	unknown	unknown	Original	Nasopharyngeal and oropharyngeal swab		B.1.160	GH	Illumina	V-pipe
EPI_ISL_1119474	hCoV-19/Switzerland/BE-ETHZ-500963/2020	2020-11-02	Europe / Switzerland / Bern	Human		unknown	unknown	unknown	Original	Nasopharyngeal and oropharyngeal swab		B.1.177	GV	Illumina	V-pipe
EPI_ISL_1119475	hCoV-19/Switzerland/BE-ETHZ-500946/2020	2020-11-02	Europe / Switzerland / Bern	Human		unknown	unknown	unknown	Original	Nasopharyngeal and oropharyngeal swab		B.1.1.39	GR	Illumina	V-pipe
EPI_ISL_1119476	hCoV-19/Switzerland/BE-ETHZ-500033/2020	2020-11-02	Europe / Switzerland / Bern	Human		unknown	unknown	unknown	Original	Nasopharyngeal and oropharyngeal swab		B.1.177	GV	Illumina	V-pipe
EPI_ISL_1119478	hCoV-19/Switzerland/BE-ETHZ-500028/2020	2020-11-02	Europe / Switzerland / Bern	Human		unknown	unknown	unknown	Original	Nasopharyngeal and oropharyngeal swab		B.1.160	GH	Illumina	V-pipe
EPI_ISL_1119480	hCoV-19/Switzerland/BE-ETHZ-500931/2020	2020-11-02	Europe / Switzerland / Bern	Human		unknown	unknown	unknown	Original	Nasopharyngeal and oropharyngeal swab		B.1.160	GH	Illumina	V-pipe
EPI_ISL_1119481	hCoV-19/Switzerland/BE-ETHZ-500003/2020	2020-11-02	Europe / Switzerland / Bern	Human		unknown	unknown	unknown	Original	Nasopharyngeal and oropharyngeal swab		B.1.1.70	GR	Illumina	V-pipe
EPI_ISL_1119482	hCoV-19/Switzerland/BL-ETHZ-500920/2020	2020-11-02	Europe / Switzerland / Basel-Landschaft	Human		unknown	unknown	unknown	Original	Nasopharyngeal and oropharyngeal swab		B.1.177	GV	Illumina	V-pipe
EPI_ISL_1119483	hCoV-19/Switzerland/BL-ETHZ-500924/2020	2020-11-02	Europe / Switzerland / Basel-Landschaft	Human		unknown	unknown	unknown	Original	Nasopharyngeal and oropharyngeal swab		B.1.1.39	GR	Illumina	V-pipe
EPI_ISL_1119484	hCoV-19/Switzerland/BL-ETHZ-500927/2020	2020-11-02	Europe / Switzerland / Basel-Landschaft	Human		unknown	unknown	unknown	Original	Nasopharyngeal and oropharyngeal swab		B.1.177	GV	Illumina	V-pipe
EPI_ISL_1119486	hCoV-19/Switzerland/BL-ETHZ-500929/2020	2020-11-02	Europe / Switzerland / Basel-Landschaft	Human		unknown	unknown	unknown	Original	Nasopharyngeal and oropharyngeal swab		B.1.177.23	GV	Illumina	V-pipe
EPI_ISL_1119487	hCoV-19/Switzerland/BL-ETHZ-500008/2020	2020-11-02	Europe / Switzerland / Basel-Landschaft	Human		unknown	unknown	unknown	Original	Nasopharyngeal and oropharyngeal swab		B.1.160	GH	Illumina	V-pipe
EPI_ISL_1119488	hCoV-19/Switzerland/BL-ETHZ-500926/2020	2020-11-02	Europe / Switzerland / Basel-Landschaft	Human		unknown	unknown	unknown	Original	Nasopharyngeal and oropharyngeal swab		B.1.177	GV	Illumina	V-pipe
EPI_ISL_1119490	hCoV-19/Switzerland/BL-ETHZ-500956/2020	2020-11-02	Europe / Switzerland / Basel-Landschaft	Human		unknown	unknown	unknown	Original	Nasopharyngeal and oropharyngeal swab		B.1.221	G	Illumina	V-pipe
EPI_ISL_1119491	hCoV-19/Switzerland/BL-ETHZ-500922/2020	2020-11-02	Europe / Switzerland / Basel-Landschaft	Human		unknown	unknown	unknown	Original	Nasopharyngeal and oropharyngeal swab		B.1.160	GH	Illumina	V-pipe
EPI_ISL_1119493	hCoV-19/Switzerland/BS-ETHZ-500945/2020	2020-11-02	Europe / Switzerland / Basel-Stadt	Human		unknown	unknown	unknown	Original	Nasopharyngeal and oropharyngeal swab		B.1.1.39	GR	Illumina	V-pipe
EPI_ISL_1119494	hCoV-19/Switzerland/GE-ETHZ-500947/2020	2020-11-02	Europe / Switzerland / Geneva	Human		unknown	unknown	unknown	Original	Nasopharyngeal and oropharyngeal swab		B.1.1.269	GR	Illumina	V-pipe
EPI_ISL_1119497	hCoV-19/Switzerland/GE-ETHZ-500013/2020	2020-11-02	Europe / Switzerland / Geneva	Human		unknown	unknown	unknown	Original	Nasopharyngeal and oropharyngeal swab		B.1.177	GV	Illumina	V-pipe
EPI_ISL_1119498	hCoV-19/Switzerland/GR-ETHZ-500025/2020	2020-11-02	Europe / Switzerland / Graubunden	Human		unknown	unknown	unknown	Original	Nasopharyngeal and oropharyngeal swab		B.1.160	GH	Illumina	V-pipe
EPI_ISL_1119499	hCoV-19/Switzerland/SO-ETHZ-500040/2020	2020-11-02	Europe / Switzerland / Solothurn	Human		unknown	unknown	unknown	Original	Nasopharyngeal and oropharyngeal swab		B.1.160	GH	Illumina	V-pipe
EPI_ISL_1119501	hCoV-19/Switzerland/SO-ETHZ-500942/2020	2020-11-02	Europe / Switzerland / Solothurn	Human		unknown	unknown	unknown	Original	Nasopharyngeal and oropharyngeal swab		B.1.177.23	GV	Illumina	V-pipe
EPI_ISL_1119503	hCoV-19/Switzerland/SO-ETHZ-500038/2020	2020-11-02	Europe / Switzerland / Solothurn	Human		unknown	unknown	unknown	Original	Nasopharyngeal and oropharyngeal swab		B.1.1.39	GR	Illumina	V-pipe
EPI_ISL_1119506	hCoV-19/Switzerland/TI-ETHZ-500949/2020	2020-11-02	Europe / Switzerland / Ticino	Human		unknown	unknown	unknown	Original	Nasopharyngeal and oropharyngeal swab		B.1.177	GV	Illumina	V-pipe
EPI_ISL_1119507	hCoV-19/Switzerland/TI-ETHZ-500941/2020	2020-11-02	Europe / Switzerland / Ticino	Human		unknown	unknown	unknown	Original	Nasopharyngeal and oropharyngeal swab		B.1.177	GV	Illumina	V-pipe
EPI_ISL_1119508	hCoV-19/Switzerland/VD-ETHZ-500939/2020	2020-11-02	Europe / Switzerland / Vaud	Human		unknown	unknown	unknown	Original	Nasopharyngeal and oropharyngeal swab		B.1.177.21	GV	Illumina	V-pipe
EPI_ISL_1119509	hCoV-19/Switzerland/VD-ETHZ-500020/2020	2020-11-02	Europe / Switzerland / Vaud	Human		unknown	unknown	unknown	Original	Nasopharyngeal and oropharyngeal swab		B.1.160	GH	Illumina	V-pipe
EPI_ISL_1119511	hCoV-19/Switzerland/VD-ETHZ-500889/2020	2020-11-02	Europe / Switzerland / Vaud	Human		unknown	unknown	unknown	Original	Nasopharyngeal and oropharyngeal swab		B.1.177	GV	Illumina	V-pipe
EPI_ISL_1119512	hCoV-19/Switzerland/VD-ETHZ-500933/2020	2020-11-02	Europe / Switzerland / Vaud	Human		unknown	unknown	unknown	Original	Nasopharyngeal and oropharyngeal swab		B.1.177.14	GV	Illumina	V-pipe
EPI_ISL_1119513	hCoV-19/Switzerland/VS-ETHZ-500011/2020	2020-11-02	Europe / Switzerland / Valais	Human		unknown	unknown	unknown	Original	Nasopharyngeal and oropharyngeal swab		B.1.221	G	Illumina	V-pipe
EPI_ISL_1119514	hCoV-19/Switzerland/VS-ETHZ-500932/2020	2020-11-02	Europe / Switzerland / Valais	Human		unknown	unknown	unknown	Original	Nasopharyngeal and oropharyngeal swab		B.1.160	GH	Illumina	V-pipe
EPI_ISL_1119515	hCoV-19/Switzerland/VS-ETHZ-500014/2020	2020-11-02	Europe / Switzerland / Valais	Human		unknown	unknown	unknown	Original	Nasopharyngeal and oropharyngeal swab		B.1.177	GV	Illumina	V-pipe
EPI_ISL_1119516	hCoV-19/Switzerland/VS-ETHZ-500015/2020	2020-11-02	Europe / Switzerland / Valais	Human		unknown	unknown	unknown	Original	Nasopharyngeal and oropharyngeal swab		B.1.221	G	Illumina	V-pipe
EPI_ISL_1119517	hCoV-19/Switzerland/VS-ETHZ-500012/2020	2020-11-02	Europe / Switzerland / Valais	Human		unknown	unknown	unknown	Original	Nasopharyngeal and oropharyngeal swab		B.1.177	GV	Illumina	V-pipe
EPI_ISL_1119519	hCoV-19/Switzerland/VS-ETHZ-500001/2020	2020-11-02	Europe / Switzerland / Valais	Human		unknown	unknown	unknown	Original	Nasopharyngeal and oropharyngeal swab		B.1.177	GV	Illumina	V-pipe
EPI_ISL_1119523	hCoV-19/Switzerland/ZH-ETHZ-500018/2020	2020-11-02	Europe / Switzerland / Zurich	Human		unknown	unknown	unknown	Original	Nasopharyngeal and oropharyngeal swab		B.1.221	G	Illumina	V-pipe
EPI_ISL_1119525	hCoV-19/Switzerland/AG-ETHZ-500986/2020	2020-11-04	Europe / Switzerland / Aargau	Human		unknown	unknown	unknown	Original	Nasopharyngeal and oropharyngeal swab		B.1.177	GV	Illumina	V-pipe
EPI_ISL_1119526	hCoV-19/Switzerland/AG-ETHZ-500984/2020	2020-11-04	Europe / Switzerland / Aargau	Human		unknown	unknown	unknown	Original	Nasopharyngeal and oropharyngeal swab		B.1.177	GV	Illumina	V-pipe
EPI_ISL_1119528	hCoV-19/Switzerland/AG-ETHZ-501005/2020	2020-11-04	Europe / Switzerland / Aargau	Human		unknown	unknown	unknown	Original	Nasopharyngeal and oropharyngeal swab		B.1.1.232	GR	Illumina	V-pipe
EPI_ISL_1119530	hCoV-19/Switzerland/AG-ETHZ-501013/2020	2020-11-04	Europe / Switzerland / Aargau	Human		unknown	unknown	unknown	Original	Nasopharyngeal and oropharyngeal swab		B.1.177.23	GV	Illumina	V-pipe
EPI_ISL_1119531	hCoV-19/Switzerland/AG-ETHZ-500983/2020	2020-11-04	Europe / Switzerland / Aargau	Human		unknown	unknown	unknown	Original	Nasopharyngeal and oropharyngeal swab		B.1.177	GV	Illumina	V-pipe
EPI_ISL_1119532	hCoV-19/Switzerland/AG-ETHZ-500971/2020	2020-11-04	Europe / Switzerland / Aargau	Human		unknown	unknown	unknown	Original	Nasopharyngeal and oropharyngeal swab		B.1.1.29	GR	Illumina	V-pipe
EPI_ISL_1119538	hCoV-19/Switzerland/BE-ETHZ-501063/2020	2020-11-04	Europe / Switzerland / Bern	Human		unknown	unknown	unknown	Original	Nasopharyngeal and oropharyngeal swab		B.1.1.144	GR	Illumina	V-pipe
EPI_ISL_1119539	hCoV-19/Switzerland/BE-ETHZ-500979/2020	2020-11-04	Europe / Switzerland / Bern	Human		unknown	unknown	unknown	Original	Nasopharyngeal and oropharyngeal swab		B.1.177	GV	Illumina	V-pipe
EPI_ISL_1119540	hCoV-19/Switzerland/BE-ETHZ-500042/2020	2020-11-04	Europe / Switzerland / Bern	Human		unknown	unknown	unknown	Original	Nasopharyngeal and oropharyngeal swab		B.1.177	GV	Illumina	V-pipe
EPI_ISL_1119541	hCoV-19/Switzerland/BL-ETHZ-500048/2020	2020-11-04	Europe / Switzerland / Basel-Landschaft	Human		unknown	unknown	unknown	Original	Nasopharyngeal and oropharyngeal swab		B.1.1.39	GR	Illumina	V-pipe
EPI_ISL_1119542	hCoV-19/Switzerland/BL-ETHZ-500054/2020	2020-11-04	Europe / Switzerland / Basel-Landschaft	Human		unknown	unknown	unknown	Original	Nasopharyngeal and oropharyngeal swab		B.1.177	GV	Illumina	V-pipe
EPI_ISL_1119543	hCoV-19/Switzerland/BL-ETHZ-501050/2020	2020-11-04	Europe / Switzerland / Basel-Landschaft	Human		unknown	unknown	unknown	Original	Nasopharyngeal and oropharyngeal swab		B.1.160	GH	Illumina	V-pipe
EPI_ISL_1119545	hCoV-19/Switzerland/BL-ETHZ-500044/2020	2020-11-04	Europe / Switzerland / Basel-Landschaft	Human		unknown	unknown	unknown	Original	Nasopharyngeal and oropharyngeal swab		B.1.160	GH	Illumina	V-pipe
EPI_ISL_1119546	hCoV-19/Switzerland/BL-ETHZ-501010/2020	2020-11-04	Europe / Switzerland / Basel-Landschaft	Human		unknown	unknown	unknown	Original	Nasopharyngeal and oropharyngeal swab		B.1.1.70	GR	Illumina	V-pipe
EPI_ISL_1119547	hCoV-19/Switzerland/BL-ETHZ-500053/2020	2020-11-04	Europe / Switzerland / Basel-Landschaft	Human		unknown	unknown	unknown	Original	Nasopharyngeal and oropharyngeal swab		B.1.177	GV	Illumina	V-pipe
EPI_ISL_1119549	hCoV-19/Switzerland/BL-ETHZ-501011/2020	2020-11-04	Europe / Switzerland / Basel-Landschaft	Human		unknown	unknown	unknown	Original	Nasopharyngeal and oropharyngeal swab		B.1.177	GV	Illumina	V-pipe
EPI_ISL_1119550	hCoV-19/Switzerland/BL-ETHZ-500041/2020	2020-11-04	Europe / Switzerland / Basel-Landschaft	Human		unknown	unknown	unknown	Original	Nasopharyngeal and oropharyngeal swab		B.1.177	GV	Illumina	V-pipe
EPI_ISL_1119551	hCoV-19/Switzerland/BL-ETHZ-500047/2020	2020-11-04	Europe / Switzerland / Basel-Landschaft	Human		unknown	unknown	unknown	Original	Nasopharyngeal and oropharyngeal swab		B.1.1.39	GR	Illumina	V-pipe
EPI_ISL_1119552	hCoV-19/Switzerland/BL-ETHZ-500050/2020	2020-11-04	Europe / Switzerland / Basel-Landschaft	Human		unknown	unknown	unknown	Original	Nasopharyngeal and oropharyngeal swab		B.1.177	GV	Illumina	V-pipe
EPI_ISL_1119553	hCoV-19/Switzerland/BL-ETHZ-500051/2020	2020-11-04	Europe / Switzerland / Basel-Landschaft	Human		unknown	unknown	unknown	Original	Nasopharyngeal and oropharyngeal swab		B.1.160	GH	Illumina	V-pipe
EPI_ISL_1119554	hCoV-19/Switzerland/BL-ETHZ-500052/2020	2020-11-04	Europe / Switzerland / Basel-Landschaft	Human		unknown	unknown	unknown	Original	Nasopharyngeal and oropharyngeal swab		B.1.177	GV	Illumina	V-pipe
EPI_ISL_1119555	hCoV-19/Switzerland/BL-ETHZ-500056/2020	2020-11-04	Europe / Switzerland / Basel-Landschaft	Human		unknown	unknown	unknown	Original	Nasopharyngeal and oropharyngeal swab		B.1.177	GV	Illumina	V-pipe
EPI_ISL_1119556	hCoV-19/Switzerland/BL-ETHZ-501040/2020	2020-11-04	Europe / Switzerland / Basel-Landschaft	Human		unknown	unknown	unknown	Original	Nasopharyngeal and oropharyngeal swab		B.1.177	GV	Illumina	V-pipe
EPI_ISL_1119560	hCoV-19/Switzerland/BL-ETHZ-501061/2020	2020-11-04	Europe / Switzerland / Basel-Landschaft	Human		unknown	unknown	unknown	Original	Nasopharyngeal and oropharyngeal swab		B.1.88	G	Illumina	V-pipe
EPI_ISL_1119561	hCoV-19/Switzerland/BL-ETHZ-501006/2020	2020-11-04	Europe / Switzerland / Basel-Landschaft	Human		unknown	unknown	unknown	Original	Nasopharyngeal and oropharyngeal swab		B.1.160	GH	Illumina	V-pipe
EPI_ISL_1119562	hCoV-19/Switzerland/BL-ETHZ-501014/2020	2020-11-04	Europe / Switzerland / Basel-Landschaft	Human		unknown	unknown	unknown	Original	Nasopharyngeal and oropharyngeal swab		B.1.177	GV	Illumina	V-pipe
EPI_ISL_1119563	hCoV-19/Switzerland/BL-ETHZ-501041/2020	2020-11-04	Europe / Switzerland / Basel-Landschaft	Human		unknown	unknown	unknown	Original	Nasopharyngeal and oropharyngeal swab		B.1.177	GV	Illumina	V-pipe
EPI_ISL_1119564	hCoV-19/Switzerland/BL-ETHZ-501015/2020	2020-11-04	Europe / Switzerland / Basel-Landschaft	Human		unknown	unknown	unknown	Original	Nasopharyngeal and oropharyngeal swab		B.1.177	GV	Illumina	V-pipe
EPI_ISL_1119566	hCoV-19/Switzerland/BL-ETHZ-500055/2020	2020-11-04	Europe / Switzerland / Basel-Landschaft	Human		unknown	unknown	unknown	Original	Nasopharyngeal and oropharyngeal swab		B.1.160	GH	Illumina	V-pipe
EPI_ISL_1119568	hCoV-19/Switzerland/BL-ETHZ-500996/2020	2020-11-04	Europe / Switzerland / Basel-Landschaft	Human		unknown	unknown	unknown	Original	Nasopharyngeal and oropharyngeal swab		B.1.160	GH	Illumina	V-pipe
EPI_ISL_1119571	hCoV-19/Switzerland/BL-ETHZ-500046/2020	2020-11-04	Europe / Switzerland / Basel-Landschaft	Human		unknown	unknown	unknown	Original	Nasopharyngeal and oropharyngeal swab		B.1.367	GH	Illumina	V-pipe
EPI_ISL_1119572	hCoV-19/Switzerland/BS-ETHZ-501057/2020	2020-11-04	Europe / Switzerland / Basel-Stadt	Human		unknown	unknown	unknown	Original	Nasopharyngeal and oropharyngeal swab		B.1.160	GH	Illumina	V-pipe
EPI_ISL_1119573	hCoV-19/Switzerland/BS-ETHZ-501007/2020	2020-11-04	Europe / Switzerland / Basel-Stadt	Human		unknown	unknown	unknown	Original	Nasopharyngeal and oropharyngeal swab		B.1.2	GH	Illumina	V-pipe
EPI_ISL_1119575	hCoV-19/Switzerland/SH-ETHZ-500968/2020	2020-11-04	Europe / Switzerland / Schaffhausen	Human		unknown	unknown	unknown	Original	Nasopharyngeal and oropharyngeal swab		B.1.177	GV	Illumina	V-pipe
EPI_ISL_1119576	hCoV-19/Switzerland/SO-ETHZ-501025/2020	2020-11-04	Europe / Switzerland / Solothurn	Human		unknown	unknown	unknown	Original	Nasopharyngeal and oropharyngeal swab		B.1.36.17	GH	Illumina	V-pipe
EPI_ISL_1119578	hCoV-19/Switzerland/SO-ETHZ-501036/2020	2020-11-04	Europe / Switzerland / Solothurn	Human		unknown	unknown	unknown	Original	Nasopharyngeal and oropharyngeal swab		B.1.177	GV	Illumina	V-pipe
EPI_ISL_1119579	hCoV-19/Switzerland/SO-ETHZ-501037/2020	2020-11-04	Europe / Switzerland / Solothurn	Human		unknown	unknown	unknown	Original	Nasopharyngeal and oropharyngeal swab		B.1.160	GH	Illumina	V-pipe
EPI_ISL_1119580	hCoV-19/Switzerland/SO-ETHZ-501058/2020	2020-11-04	Europe / Switzerland / Solothurn	Human		unknown	unknown	unknown	Original	Nasopharyngeal and oropharyngeal swab		B.1.160	GH	Illumina	V-pipe
EPI_ISL_1119582	hCoV-19/Switzerland/SO-ETHZ-501032/2020	2020-11-04	Europe / Switzerland / Solothurn	Human		unknown	unknown	unknown	Original	Nasopharyngeal and oropharyngeal swab		B.1.1.39	GR	Illumina	V-pipe
EPI_ISL_1119583	hCoV-19/Switzerland/SO-ETHZ-501059/2020	2020-11-04	Europe / Switzerland / Solothurn	Human		unknown	unknown	unknown	Original	Nasopharyngeal and oropharyngeal swab		B.1.177	GV	Illumina	V-pipe
EPI_ISL_1119585	hCoV-19/Switzerland/SO-ETHZ-501018/2020	2020-11-04	Europe / Switzerland / Solothurn	Human		unknown	unknown	unknown	Original	Nasopharyngeal and oropharyngeal swab		B.1.177	GV	Illumina	V-pipe
EPI_ISL_1119586	hCoV-19/Switzerland/SO-ETHZ-501021/2020	2020-11-04	Europe / Switzerland / Solothurn	Human		unknown	unknown	unknown	Original	Nasopharyngeal and oropharyngeal swab		B.1.1.39	GR	Illumina	V-pipe
EPI_ISL_1119587	hCoV-19/Switzerland/SO-ETHZ-501034/2020	2020-11-04	Europe / Switzerland / Solothurn	Human		unknown	unknown	unknown	Original	Nasopharyngeal and oropharyngeal swab		B.1.177	GV	Illumina	V-pipe
EPI_ISL_1119588	hCoV-19/Switzerland/SO-ETHZ-501060/2020	2020-11-04	Europe / Switzerland / Solothurn	Human		unknown	unknown	unknown	Original	Nasopharyngeal and oropharyngeal swab		B.1.236	G	Illumina	V-pipe
EPI_ISL_1119590	hCoV-19/Switzerland/SO-ETHZ-501019/2020	2020-11-04	Europe / Switzerland / Solothurn	Human		unknown	unknown	unknown	Original	Nasopharyngeal and oropharyngeal swab		B.1.1.39	GR	Illumina	V-pipe
EPI_ISL_1119592	hCoV-19/Switzerland/SO-ETHZ-501026/2020	2020-11-04	Europe / Switzerland / Solothurn	Human		unknown	unknown	unknown	Original	Nasopharyngeal and oropharyngeal swab		B.1.177	GV	Illumina	V-pipe
EPI_ISL_1119593	hCoV-19/Switzerland/TI-ETHZ-500990/2020	2020-11-04	Europe / Switzerland / Ticino	Human		unknown	unknown	unknown	Original	Nasopharyngeal and oropharyngeal swab		B.1.177	GV	Illumina	V-pipe
EPI_ISL_1119594	hCoV-19/Switzerland/TI-ETHZ-500980/2020	2020-11-04	Europe / Switzerland / Ticino	Human		unknown	unknown	unknown	Original	Nasopharyngeal and oropharyngeal swab		B.1.177	GV	Illumina	V-pipe
EPI_ISL_1119600	hCoV-19/Switzerland/ZH-ETHZ-500970/2020	2020-11-04	Europe / Switzerland / Zurich	Human		unknown	unknown	unknown	Original	Nasopharyngeal and oropharyngeal swab		B.1.177	GV	Illumina	V-pipe
EPI_ISL_1119601	hCoV-19/Switzerland/ZH-ETHZ-501031/2020	2020-11-04	Europe / Switzerland / Zurich	Human		unknown	unknown	unknown	Original	Nasopharyngeal and oropharyngeal swab		B.1.160	GH	Illumina	V-pipe
EPI_ISL_1119602	hCoV-19/Switzerland/ZH-ETHZ-500972/2020	2020-11-04	Europe / Switzerland / Zurich	Human		unknown	unknown	unknown	Original	Nasopharyngeal and oropharyngeal swab		B.1.177.23	GV	Illumina	V-pipe
EPI_ISL_1119603	hCoV-19/Switzerland/GE-ETHZ-501073/2020	2020-11-06	Europe / Switzerland / Geneva	Human		unknown	unknown	unknown	Original	Nasopharyngeal and oropharyngeal swab		B.1.1.39	GR	Illumina	V-pipe
EPI_ISL_1119604	hCoV-19/Switzerland/GE-ETHZ-501080/2020	2020-11-06	Europe / Switzerland / Geneva	Human		unknown	unknown	unknown	Original	Nasopharyngeal and oropharyngeal swab		B.1.177	GV	Illumina	V-pipe
EPI_ISL_1119605	hCoV-19/Switzerland/GE-ETHZ-501079/2020	2020-11-06	Europe / Switzerland / Geneva	Human		unknown	unknown	unknown	Original	Nasopharyngeal and oropharyngeal swab		B.1.160	GH	Illumina	V-pipe
EPI_ISL_1119607	hCoV-19/Switzerland/VD-ETHZ-501064/2020	2020-11-06	Europe / Switzerland / Vaud	Human		unknown	unknown	unknown	Original	Nasopharyngeal and oropharyngeal swab		B.1.160	GH	Illumina	V-pipe
EPI_ISL_1119608	hCoV-19/Switzerland/VD-ETHZ-501091/2020	2020-11-06	Europe / Switzerland / Vaud	Human		unknown	unknown	unknown	Original	Nasopharyngeal and oropharyngeal swab		B.1.177	GV	Illumina	V-pipe
EPI_ISL_1119610	hCoV-19/Switzerland/AG-ETHZ-501204/2020	2020-11-07	Europe / Switzerland / Aargau	Human		unknown	unknown	unknown	Original	Nasopharyngeal and oropharyngeal swab		B.1.177	GV	Illumina	V-pipe
EPI_ISL_1119611	hCoV-19/Switzerland/AG-ETHZ-501203/2020	2020-11-07	Europe / Switzerland / Aargau	Human		unknown	unknown	unknown	Original	Nasopharyngeal and oropharyngeal swab		B.1.221	G	Illumina	V-pipe
EPI_ISL_1119612	hCoV-19/Switzerland/BE-ETHZ-501207/2020	2020-11-07	Europe / Switzerland / Bern	Human		unknown	unknown	unknown	Original	Nasopharyngeal and oropharyngeal swab		B.1.177	GV	Illumina	V-pipe
EPI_ISL_1119613	hCoV-19/Switzerland/BE-ETHZ-501092/2020	2020-11-07	Europe / Switzerland / Bern	Human		unknown	unknown	unknown	Original	Nasopharyngeal and oropharyngeal swab		B.1.160	GH	Illumina	V-pipe
EPI_ISL_1119614	hCoV-19/Switzerland/BE-ETHZ-501224/2020	2020-11-07	Europe / Switzerland / Bern	Human		unknown	unknown	unknown	Original	Nasopharyngeal and oropharyngeal swab		B.1.177	GV	Illumina	V-pipe
EPI_ISL_1119615	hCoV-19/Switzerland/BE-ETHZ-501232/2020	2020-11-07	Europe / Switzerland / Bern	Human		unknown	unknown	unknown	Original	Nasopharyngeal and oropharyngeal swab		B.1.160	GH	Illumina	V-pipe
EPI_ISL_1119617	hCoV-19/Switzerland/BE-ETHZ-501223/2020	2020-11-07	Europe / Switzerland / Bern	Human		unknown	unknown	unknown	Original	Nasopharyngeal and oropharyngeal swab		B.1.160	GH	Illumina	V-pipe
EPI_ISL_1119618	hCoV-19/Switzerland/BE-ETHZ-501248/2020	2020-11-07	Europe / Switzerland / Bern	Human		unknown	unknown	unknown	Original	Nasopharyngeal and oropharyngeal swab		B.1.177	GV	Illumina	V-pipe
EPI_ISL_1119619	hCoV-19/Switzerland/BE-ETHZ-501255/2020	2020-11-07	Europe / Switzerland / Bern	Human		unknown	unknown	unknown	Original	Nasopharyngeal and oropharyngeal swab		B.1.160	GH	Illumina	V-pipe
EPI_ISL_1119620	hCoV-19/Switzerland/BE-ETHZ-501230/2020	2020-11-07	Europe / Switzerland / Bern	Human		unknown	unknown	unknown	Original	Nasopharyngeal and oropharyngeal swab		B.1.177	GV	Illumina	V-pipe
EPI_ISL_1119621	hCoV-19/Switzerland/BE-ETHZ-501257/2020	2020-11-07	Europe / Switzerland / Bern	Human		unknown	unknown	unknown	Original	Nasopharyngeal and oropharyngeal swab		B.1.221	G	Illumina	V-pipe
EPI_ISL_1119622	hCoV-19/Switzerland/BE-ETHZ-501219/2020	2020-11-07	Europe / Switzerland / Bern	Human		unknown	unknown	unknown	Original	Nasopharyngeal and oropharyngeal swab		B.1.1.39	GR	Illumina	V-pipe
EPI_ISL_1119623	hCoV-19/Switzerland/BE-ETHZ-501252/2020	2020-11-07	Europe / Switzerland / Bern	Human		unknown	unknown	unknown	Original	Nasopharyngeal and oropharyngeal swab		B.1.1.232	GR	Illumina	V-pipe
EPI_ISL_1119625	hCoV-19/Switzerland/BE-ETHZ-501220/2020	2020-11-07	Europe / Switzerland / Bern	Human		unknown	unknown	unknown	Original	Nasopharyngeal and oropharyngeal swab		B.1.177	GV	Illumina	V-pipe
EPI_ISL_1119626	hCoV-19/Switzerland/BE-ETHZ-501225/2020	2020-11-07	Europe / Switzerland / Bern	Human		unknown	unknown	unknown	Original	Nasopharyngeal and oropharyngeal swab		B.1.1.29	GR	Illumina	V-pipe
EPI_ISL_1119627	hCoV-19/Switzerland/BE-ETHZ-501213/2020	2020-11-07	Europe / Switzerland / Bern	Human		unknown	unknown	unknown	Original	Nasopharyngeal and oropharyngeal swab		B.1.1.39	GR	Illumina	V-pipe
EPI_ISL_1119629	hCoV-19/Switzerland/BE-ETHZ-501200/2020	2020-11-07	Europe / Switzerland / Bern	Human		unknown	unknown	unknown	Original	Nasopharyngeal and oropharyngeal swab		B.1.177	GV	Illumina	V-pipe
EPI_ISL_1119631	hCoV-19/Switzerland/BE-ETHZ-501244/2020	2020-11-07	Europe / Switzerland / Bern	Human		unknown	unknown	unknown	Original	Nasopharyngeal and oropharyngeal swab		B.1.177	GV	Illumina	V-pipe
EPI_ISL_1119633	hCoV-19/Switzerland/BE-ETHZ-501212/2020	2020-11-07	Europe / Switzerland / Bern	Human		unknown	unknown	unknown	Original	Nasopharyngeal and oropharyngeal swab		B.1.177	GV	Illumina	V-pipe
EPI_ISL_1119634	hCoV-19/Switzerland/BE-ETHZ-501201/2020	2020-11-07	Europe / Switzerland / Bern	Human		unknown	unknown	unknown	Original	Nasopharyngeal and oropharyngeal swab		B.1.160	GH	Illumina	V-pipe
EPI_ISL_1119635	hCoV-19/Switzerland/BE-ETHZ-501250/2020	2020-11-07	Europe / Switzerland / Bern	Human		unknown	unknown	unknown	Original	Nasopharyngeal and oropharyngeal swab		B.1.160	GH	Illumina	V-pipe
EPI_ISL_1119636	hCoV-19/Switzerland/BE-ETHZ-501217/2020	2020-11-07	Europe / Switzerland / Bern	Human		unknown	unknown	unknown	Original	Nasopharyngeal and oropharyngeal swab		B.1.1.39	GR	Illumina	V-pipe
EPI_ISL_1119640	hCoV-19/Switzerland/BE-ETHZ-501210/2020	2020-11-07	Europe / Switzerland / Bern	Human		unknown	unknown	unknown	Original	Nasopharyngeal and oropharyngeal swab		B.1.177	GV	Illumina	V-pipe
EPI_ISL_1119641	hCoV-19/Switzerland/BE-ETHZ-501211/2020	2020-11-07	Europe / Switzerland / Bern	Human		unknown	unknown	unknown	Original	Nasopharyngeal and oropharyngeal swab		B.1.1.144	GR	Illumina	V-pipe
EPI_ISL_1119643	hCoV-19/Switzerland/BE-ETHZ-501227/2020	2020-11-07	Europe / Switzerland / Bern	Human		unknown	unknown	unknown	Original	Nasopharyngeal and oropharyngeal swab		B.1.177	GV	Illumina	V-pipe
EPI_ISL_1119645	hCoV-19/Switzerland/BL-ETHZ-501135/2020	2020-11-07	Europe / Switzerland / Basel-Landschaft	Human		unknown	unknown	unknown	Original	Nasopharyngeal and oropharyngeal swab		B.1.1.247	GR	Illumina	V-pipe
EPI_ISL_1119646	hCoV-19/Switzerland/BL-ETHZ-501094/2020	2020-11-07	Europe / Switzerland / Basel-Landschaft	Human		unknown	unknown	unknown	Original	Nasopharyngeal and oropharyngeal swab		B.1.36.1	GH	Illumina	V-pipe
EPI_ISL_1119651	hCoV-19/Switzerland/BL-ETHZ-501113/2020	2020-11-07	Europe / Switzerland / Basel-Landschaft	Human		unknown	unknown	unknown	Original	Nasopharyngeal and oropharyngeal swab		B.1.221	G	Illumina	V-pipe
EPI_ISL_1119654	hCoV-19/Switzerland/BL-ETHZ-501142/2020	2020-11-07	Europe / Switzerland / Basel-Landschaft	Human		unknown	unknown	unknown	Original	Nasopharyngeal and oropharyngeal swab		B.1.1.39	GR	Illumina	V-pipe
EPI_ISL_1119655	hCoV-19/Switzerland/BL-ETHZ-501150/2020	2020-11-07	Europe / Switzerland / Basel-Landschaft	Human		unknown	unknown	unknown	Original	Nasopharyngeal and oropharyngeal swab		B.1.1.247	GR	Illumina	V-pipe
EPI_ISL_1119657	hCoV-19/Switzerland/BL-ETHZ-501154/2020	2020-11-07	Europe / Switzerland / Basel-Landschaft	Human		unknown	unknown	unknown	Original	Nasopharyngeal and oropharyngeal swab		B.1.160	GH	Illumina	V-pipe
EPI_ISL_1119659	hCoV-19/Switzerland/BL-ETHZ-501190/2020	2020-11-07	Europe / Switzerland / Basel-Landschaft	Human		unknown	unknown	unknown	Original	Nasopharyngeal and oropharyngeal swab		B.1.160	GH	Illumina	V-pipe
EPI_ISL_1119661	hCoV-19/Switzerland/BL-ETHZ-501102/2020	2020-11-07	Europe / Switzerland / Basel-Landschaft	Human		unknown	unknown	unknown	Original	Nasopharyngeal and oropharyngeal swab		B.1.221	G	Illumina	V-pipe
EPI_ISL_1119662	hCoV-19/Switzerland/BL-ETHZ-501131/2020	2020-11-07	Europe / Switzerland / Basel-Landschaft	Human		unknown	unknown	unknown	Original	Nasopharyngeal and oropharyngeal swab		B.1.1.247	GR	Illumina	V-pipe
EPI_ISL_1119663	hCoV-19/Switzerland/BL-ETHZ-501126/2020	2020-11-07	Europe / Switzerland / Basel-Landschaft	Human		unknown	unknown	unknown	Original	Nasopharyngeal and oropharyngeal swab		B.1.36.1	GH	Illumina	V-pipe
EPI_ISL_1119664	hCoV-19/Switzerland/BS-ETHZ-501156/2020	2020-11-07	Europe / Switzerland / Basel-Stadt	Human		unknown	unknown	unknown	Original	Nasopharyngeal and oropharyngeal swab		B.1.177	GV	Illumina	V-pipe
EPI_ISL_1119665	hCoV-19/Switzerland/BS-ETHZ-501155/2020	2020-11-07	Europe / Switzerland / Basel-Stadt	Human		unknown	unknown	unknown	Original	Nasopharyngeal and oropharyngeal swab		B.1.36.1	GH	Illumina	V-pipe
EPI_ISL_1119666	hCoV-19/Switzerland/GE-ETHZ-501104/2020	2020-11-07	Europe / Switzerland / Geneva	Human		unknown	unknown	unknown	Original	Nasopharyngeal and oropharyngeal swab		B.1.160	GH	Illumina	V-pipe
EPI_ISL_1119670	hCoV-19/Switzerland/GE-ETHZ-501117/2020	2020-11-07	Europe / Switzerland / Geneva	Human		unknown	unknown	unknown	Original	Nasopharyngeal and oropharyngeal swab		B.1.177	GV	Illumina	V-pipe
EPI_ISL_1119675	hCoV-19/Switzerland/NE-ETHZ-501137/2020	2020-11-07	Europe / Switzerland / Neuchatel	Human		unknown	unknown	unknown	Original	Nasopharyngeal and oropharyngeal swab		B.1.177	GV	Illumina	V-pipe
EPI_ISL_1119677	hCoV-19/Switzerland/NE-ETHZ-501101/2020	2020-11-07	Europe / Switzerland / Neuchatel	Human		unknown	unknown	unknown	Original	Nasopharyngeal and oropharyngeal swab		B.1.160	GH	Illumina	V-pipe
EPI_ISL_1119678	hCoV-19/Switzerland/NE-ETHZ-501085/2020	2020-11-07	Europe / Switzerland / Neuchatel	Human		unknown	unknown	unknown	Original	Nasopharyngeal and oropharyngeal swab		B.1.177	GV	Illumina	V-pipe
EPI_ISL_1119679	hCoV-19/Switzerland/NE-ETHZ-501106/2020	2020-11-07	Europe / Switzerland / Neuchatel	Human		unknown	unknown	unknown	Original	Nasopharyngeal and oropharyngeal swab		B.1.160	GH	Illumina	V-pipe
EPI_ISL_1119681	hCoV-19/Switzerland/NE-ETHZ-501114/2020	2020-11-07	Europe / Switzerland / Neuchatel	Human		unknown	unknown	unknown	Original	Nasopharyngeal and oropharyngeal swab		B.1.160	GH	Illumina	V-pipe
EPI_ISL_1119682	hCoV-19/Switzerland/NE-ETHZ-501159/2020	2020-11-07	Europe / Switzerland / Neuchatel	Human		unknown	unknown	unknown	Original	Nasopharyngeal and oropharyngeal swab		B.1.160	GH	Illumina	V-pipe
EPI_ISL_1119683	hCoV-19/Switzerland/NE-ETHZ-501075/2020	2020-11-07	Europe / Switzerland / Neuchatel	Human		unknown	unknown	unknown	Original	Nasopharyngeal and oropharyngeal swab		B.1.160	GH	Illumina	V-pipe
EPI_ISL_1119684	hCoV-19/Switzerland/NE-ETHZ-501149/2020	2020-11-07	Europe / Switzerland / Neuchatel	Human		unknown	unknown	unknown	Original	Nasopharyngeal and oropharyngeal swab		B.1.160	GH	Illumina	V-pipe
EPI_ISL_1119685	hCoV-19/Switzerland/NE-ETHZ-501129/2020	2020-11-07	Europe / Switzerland / Neuchatel	Human		unknown	unknown	unknown	Original	Nasopharyngeal and oropharyngeal swab		B.1.146	G	Illumina	V-pipe
EPI_ISL_1119686	hCoV-19/Switzerland/NE-ETHZ-501116/2020	2020-11-07	Europe / Switzerland / Neuchatel	Human		unknown	unknown	unknown	Original	Nasopharyngeal and oropharyngeal swab		B.1.177	GV	Illumina	V-pipe
EPI_ISL_1119687	hCoV-19/Switzerland/NE-ETHZ-501162/2020	2020-11-07	Europe / Switzerland / Neuchatel	Human		unknown	unknown	unknown	Original	Nasopharyngeal and oropharyngeal swab		B.1.177	GV	Illumina	V-pipe
EPI_ISL_1119688	hCoV-19/Switzerland/NE-ETHZ-501083/2020	2020-11-07	Europe / Switzerland / Neuchatel	Human		unknown	unknown	unknown	Original	Nasopharyngeal and oropharyngeal swab		B.1.177	GV	Illumina	V-pipe
EPI_ISL_1119689	hCoV-19/Switzerland/NE-ETHZ-501170/2020	2020-11-07	Europe / Switzerland / Neuchatel	Human		unknown	unknown	unknown	Original	Nasopharyngeal and oropharyngeal swab		B.1.160	GH	Illumina	V-pipe
EPI_ISL_1119690	hCoV-19/Switzerland/NE-ETHZ-501093/2020	2020-11-07	Europe / Switzerland / Neuchatel	Human		unknown	unknown	unknown	Original	Nasopharyngeal and oropharyngeal swab		B.1.177	GV	Illumina	V-pipe
EPI_ISL_1119693	hCoV-19/Switzerland/SO-ETHZ-501240/2020	2020-11-07	Europe / Switzerland / Solothurn	Human		unknown	unknown	unknown	Original	Nasopharyngeal and oropharyngeal swab		B.1.177	GV	Illumina	V-pipe
EPI_ISL_1119694	hCoV-19/Switzerland/SO-ETHZ-501247/2020	2020-11-07	Europe / Switzerland / Solothurn	Human		unknown	unknown	unknown	Original	Nasopharyngeal and oropharyngeal swab		B.1.1.39	GR	Illumina	V-pipe
EPI_ISL_1119695	hCoV-19/Switzerland/SO-ETHZ-501185/2020	2020-11-07	Europe / Switzerland / Solothurn	Human		unknown	unknown	unknown	Original	Nasopharyngeal and oropharyngeal swab		B.1.177	GV	Illumina	V-pipe
EPI_ISL_1119696	hCoV-19/Switzerland/SO-ETHZ-501243/2020	2020-11-07	Europe / Switzerland / Solothurn	Human		unknown	unknown	unknown	Original	Nasopharyngeal and oropharyngeal swab		B.1.1.39	GR	Illumina	V-pipe
EPI_ISL_1119697	hCoV-19/Switzerland/SO-ETHZ-501261/2020	2020-11-07	Europe / Switzerland / Solothurn	Human		unknown	unknown	unknown	Original	Nasopharyngeal and oropharyngeal swab		B.1.177	GV	Illumina	V-pipe
EPI_ISL_1119699	hCoV-19/Switzerland/SO-ETHZ-501242/2020	2020-11-07	Europe / Switzerland / Solothurn	Human		unknown	unknown	unknown	Original	Nasopharyngeal and oropharyngeal swab		B.1.1.39	GR	Illumina	V-pipe
EPI_ISL_1119700	hCoV-19/Switzerland/SO-ETHZ-501234/2020	2020-11-07	Europe / Switzerland / Solothurn	Human		unknown	unknown	unknown	Original	Nasopharyngeal and oropharyngeal swab		B.1.1.39	GR	Illumina	V-pipe
EPI_ISL_1119701	hCoV-19/Switzerland/SO-ETHZ-501236/2020	2020-11-07	Europe / Switzerland / Solothurn	Human		unknown	unknown	unknown	Original	Nasopharyngeal and oropharyngeal swab		B.1.1.70	GR	Illumina	V-pipe
EPI_ISL_1119702	hCoV-19/Switzerland/SO-ETHZ-501235/2020	2020-11-07	Europe / Switzerland / Solothurn	Human		unknown	unknown	unknown	Original	Nasopharyngeal and oropharyngeal swab		B.1.177	GV	Illumina	V-pipe
EPI_ISL_1119704	hCoV-19/Switzerland/VD-ETHZ-501143/2020	2020-11-07	Europe / Switzerland / Vaud	Human		unknown	unknown	unknown	Original	Nasopharyngeal and oropharyngeal swab		B.1.160	GH	Illumina	V-pipe
EPI_ISL_1119706	hCoV-19/Switzerland/VD-ETHZ-501112/2020	2020-11-07	Europe / Switzerland / Vaud	Human		unknown	unknown	unknown	Original	Nasopharyngeal and oropharyngeal swab		B.1.177	GV	Illumina	V-pipe
EPI_ISL_1119707	hCoV-19/Switzerland/VD-ETHZ-501120/2020	2020-11-07	Europe / Switzerland / Vaud	Human		unknown	unknown	unknown	Original	Nasopharyngeal and oropharyngeal swab		B.1.177	GV	Illumina	V-pipe
EPI_ISL_1119708	hCoV-19/Switzerland/VS-ETHZ-501067/2020	2020-11-07	Europe / Switzerland / Valais	Human		unknown	unknown	unknown	Original	Nasopharyngeal and oropharyngeal swab		B.1.1.269	GR	Illumina	V-pipe
EPI_ISL_1119709	hCoV-19/Switzerland/VS-ETHZ-501071/2020	2020-11-07	Europe / Switzerland / Valais	Human		unknown	unknown	unknown	Original	Nasopharyngeal and oropharyngeal swab		B.1.160	GH	Illumina	V-pipe
EPI_ISL_1119710	hCoV-19/Switzerland/VS-ETHZ-501144/2020	2020-11-07	Europe / Switzerland / Valais	Human		unknown	unknown	unknown	Original	Nasopharyngeal and oropharyngeal swab		B.1.160	GH	Illumina	V-pipe
EPI_ISL_1119711	hCoV-19/Switzerland/VS-ETHZ-501077/2020	2020-11-07	Europe / Switzerland / Valais	Human		unknown	unknown	unknown	Original	Nasopharyngeal and oropharyngeal swab		B.1.177	GV	Illumina	V-pipe
EPI_ISL_1119712	hCoV-19/Switzerland/VS-ETHZ-501098/2020	2020-11-07	Europe / Switzerland / Valais	Human		unknown	unknown	unknown	Original	Nasopharyngeal and oropharyngeal swab		B.1.177	GV	Illumina	V-pipe
EPI_ISL_1119713	hCoV-19/Switzerland/VS-ETHZ-501107/2020	2020-11-07	Europe / Switzerland / Valais	Human		unknown	unknown	unknown	Original	Nasopharyngeal and oropharyngeal swab		B.1.160	GH	Illumina	V-pipe
EPI_ISL_1119714	hCoV-19/Switzerland/ZH-ETHZ-501184/2020	2020-11-07	Europe / Switzerland / Zurich	Human		unknown	unknown	unknown	Original	Nasopharyngeal and oropharyngeal swab		B.1.1.39	GR	Illumina	V-pipe
EPI_ISL_1119715	hCoV-19/Switzerland/ZH-ETHZ-501139/2020	2020-11-07	Europe / Switzerland / Zurich	Human		unknown	unknown	unknown	Original	Nasopharyngeal and oropharyngeal swab		B.1.177	GV	Illumina	V-pipe
EPI_ISL_1119716	hCoV-19/Switzerland/ZH-ETHZ-501164/2020	2020-11-07	Europe / Switzerland / Zurich	Human		unknown	unknown	unknown	Original	Nasopharyngeal and oropharyngeal swab		B.1.1.39	GR	Illumina	V-pipe
EPI_ISL_1119717	hCoV-19/Switzerland/ZH-ETHZ-501181/2020	2020-11-07	Europe / Switzerland / Zurich	Human		unknown	unknown	unknown	Original	Nasopharyngeal and oropharyngeal swab		B.1.177	GV	Illumina	V-pipe
EPI_ISL_1119718	hCoV-19/Switzerland/ZH-ETHZ-501194/2020	2020-11-07	Europe / Switzerland / Zurich	Human		unknown	unknown	unknown	Original	Nasopharyngeal and oropharyngeal swab		B.1.160	GH	Illumina	V-pipe
EPI_ISL_1119720	hCoV-19/Switzerland/ZH-ETHZ-501196/2020	2020-11-07	Europe / Switzerland / Zurich	Human		unknown	unknown	unknown	Original	Nasopharyngeal and oropharyngeal swab		B.1.177	GV	Illumina	V-pipe
EPI_ISL_1119722	hCoV-19/Switzerland/ZH-ETHZ-501191/2020	2020-11-07	Europe / Switzerland / Zurich	Human		unknown	unknown	unknown	Original	Nasopharyngeal and oropharyngeal swab		B.1.160	GH	Illumina	V-pipe
EPI_ISL_1119723	hCoV-19/Switzerland/ZH-ETHZ-501134/2020	2020-11-07	Europe / Switzerland / Zurich	Human		unknown	unknown	unknown	Original	Nasopharyngeal and oropharyngeal swab		B.1.1.39	GR	Illumina	V-pipe
EPI_ISL_1119724	hCoV-19/Switzerland/ZH-ETHZ-501167/2020	2020-11-07	Europe / Switzerland / Zurich	Human		unknown	unknown	unknown	Original	Nasopharyngeal and oropharyngeal swab		B.1.1.39	GR	Illumina	V-pipe
EPI_ISL_1119726	hCoV-19/Switzerland/ZH-ETHZ-501195/2020	2020-11-07	Europe / Switzerland / Zurich	Human		unknown	unknown	unknown	Original	Nasopharyngeal and oropharyngeal swab		B.1.160	GH	Illumina	V-pipe
EPI_ISL_1119727	hCoV-19/Switzerland/ZH-ETHZ-501179/2020	2020-11-07	Europe / Switzerland / Zurich	Human		unknown	unknown	unknown	Original	Nasopharyngeal and oropharyngeal swab		B.1.177	GV	Illumina	V-pipe
EPI_ISL_1119728	hCoV-19/Switzerland/ZH-ETHZ-501147/2020	2020-11-07	Europe / Switzerland / Zurich	Human		unknown	unknown	unknown	Original	Nasopharyngeal and oropharyngeal swab		B.1.1.39	GR	Illumina	V-pipe
EPI_ISL_1119729	hCoV-19/Switzerland/ZH-ETHZ-501121/2020	2020-11-07	Europe / Switzerland / Zurich	Human		unknown	unknown	unknown	Original	Nasopharyngeal and oropharyngeal swab		B.1.236	G	Illumina	V-pipe
EPI_ISL_1119730	hCoV-19/Switzerland/ZH-ETHZ-501081/2020	2020-11-07	Europe / Switzerland / Zurich	Human		unknown	unknown	unknown	Original	Nasopharyngeal and oropharyngeal swab		B.1.1.39	GR	Illumina	V-pipe
EPI_ISL_1119732	hCoV-19/Switzerland/ZH-ETHZ-501124/2020	2020-11-07	Europe / Switzerland / Zurich	Human		unknown	unknown	unknown	Original	Nasopharyngeal and oropharyngeal swab		B.1.1.39	GR	Illumina	V-pipe
EPI_ISL_1119734	hCoV-19/Switzerland/AG-ETHZ-501331/2020	2020-11-08	Europe / Switzerland / Aargau	Human		unknown	unknown	unknown	Original	Nasopharyngeal and oropharyngeal swab		B.1.160	GH	Illumina	V-pipe
EPI_ISL_1119739	hCoV-19/Switzerland/NE-ETHZ-501267/2020	2020-11-08	Europe / Switzerland / Neuchatel	Human		unknown	unknown	unknown	Original	Nasopharyngeal and oropharyngeal swab		B.1.221	G	Illumina	V-pipe
EPI_ISL_1119740	hCoV-19/Switzerland/NE-ETHZ-501286/2020	2020-11-08	Europe / Switzerland / Neuchatel	Human		unknown	unknown	unknown	Original	Nasopharyngeal and oropharyngeal swab		B.1.177	GV	Illumina	V-pipe
EPI_ISL_1119741	hCoV-19/Switzerland/NE-ETHZ-501320/2020	2020-11-08	Europe / Switzerland / Neuchatel	Human		unknown	unknown	unknown	Original	Nasopharyngeal and oropharyngeal swab		B.1.1.189	GR	Illumina	V-pipe
EPI_ISL_1119742	hCoV-19/Switzerland/NE-ETHZ-501292/2020	2020-11-08	Europe / Switzerland / Neuchatel	Human		unknown	unknown	unknown	Original	Nasopharyngeal and oropharyngeal swab		B.1.160	GH	Illumina	V-pipe
EPI_ISL_1119745	hCoV-19/Switzerland/NE-ETHZ-501271/2020	2020-11-08	Europe / Switzerland / Neuchatel	Human		unknown	unknown	unknown	Original	Nasopharyngeal and oropharyngeal swab		B.1.160	GH	Illumina	V-pipe
EPI_ISL_1119746	hCoV-19/Switzerland/NE-ETHZ-501307/2020	2020-11-08	Europe / Switzerland / Neuchatel	Human		unknown	unknown	unknown	Original	Nasopharyngeal and oropharyngeal swab		B.1.160	GH	Illumina	V-pipe
EPI_ISL_1119747	hCoV-19/Switzerland/NE-ETHZ-501281/2020	2020-11-08	Europe / Switzerland / Neuchatel	Human		unknown	unknown	unknown	Original	Nasopharyngeal and oropharyngeal swab		B.1.160	GH	Illumina	V-pipe
EPI_ISL_1119748	hCoV-19/Switzerland/NE-ETHZ-501313/2020	2020-11-08	Europe / Switzerland / Neuchatel	Human		unknown	unknown	unknown	Original	Nasopharyngeal and oropharyngeal swab		B.1.177	GV	Illumina	V-pipe
EPI_ISL_1119749	hCoV-19/Switzerland/NE-ETHZ-501279/2020	2020-11-08	Europe / Switzerland / Neuchatel	Human		unknown	unknown	unknown	Original	Nasopharyngeal and oropharyngeal swab		B.1.221	G	Illumina	V-pipe
EPI_ISL_1119751	hCoV-19/Switzerland/NE-ETHZ-501270/2020	2020-11-08	Europe / Switzerland / Neuchatel	Human		unknown	unknown	unknown	Original	Nasopharyngeal and oropharyngeal swab		B.1.160	GH	Illumina	V-pipe
EPI_ISL_1119752	hCoV-19/Switzerland/NE-ETHZ-501269/2020	2020-11-08	Europe / Switzerland / Neuchatel	Human		unknown	unknown	unknown	Original	Nasopharyngeal and oropharyngeal swab		B.1.160	GH	Illumina	V-pipe
EPI_ISL_1119753	hCoV-19/Switzerland/NE-ETHZ-501282/2020	2020-11-08	Europe / Switzerland / Neuchatel	Human		unknown	unknown	unknown	Original	Nasopharyngeal and oropharyngeal swab		B.1.160	GH	Illumina	V-pipe
EPI_ISL_1119754	hCoV-19/Switzerland/NE-ETHZ-501317/2020	2020-11-08	Europe / Switzerland / Neuchatel	Human		unknown	unknown	unknown	Original	Nasopharyngeal and oropharyngeal swab		B.1.177	GV	Illumina	V-pipe
EPI_ISL_1119755	hCoV-19/Switzerland/NE-ETHZ-501265/2020	2020-11-08	Europe / Switzerland / Neuchatel	Human		unknown	unknown	unknown	Original	Nasopharyngeal and oropharyngeal swab		B.1.221	G	Illumina	V-pipe
EPI_ISL_1119756	hCoV-19/Switzerland/NE-ETHZ-501273/2020	2020-11-08	Europe / Switzerland / Neuchatel	Human		unknown	unknown	unknown	Original	Nasopharyngeal and oropharyngeal swab		B.1.160	GH	Illumina	V-pipe
EPI_ISL_1119757	hCoV-19/Switzerland/NE-ETHZ-501308/2020	2020-11-08	Europe / Switzerland / Neuchatel	Human		unknown	unknown	unknown	Original	Nasopharyngeal and oropharyngeal swab		B.1.160	GH	Illumina	V-pipe
EPI_ISL_1119759	hCoV-19/Switzerland/NE-ETHZ-501266/2020	2020-11-08	Europe / Switzerland / Neuchatel	Human		unknown	unknown	unknown	Original	Nasopharyngeal and oropharyngeal swab		B.1.146	G	Illumina	V-pipe
EPI_ISL_1119760	hCoV-19/Switzerland/NE-ETHZ-501301/2020	2020-11-08	Europe / Switzerland / Neuchatel	Human		unknown	unknown	unknown	Original	Nasopharyngeal and oropharyngeal swab		B.1.160	GH	Illumina	V-pipe
EPI_ISL_1119762	hCoV-19/Switzerland/NE-ETHZ-501276/2020	2020-11-08	Europe / Switzerland / Neuchatel	Human		unknown	unknown	unknown	Original	Nasopharyngeal and oropharyngeal swab		B.1.177	GV	Illumina	V-pipe
EPI_ISL_1119764	hCoV-19/Switzerland/NE-ETHZ-501274/2020	2020-11-08	Europe / Switzerland / Neuchatel	Human		unknown	unknown	unknown	Original	Nasopharyngeal and oropharyngeal swab		B.1.160	GH	Illumina	V-pipe
EPI_ISL_1119765	hCoV-19/Switzerland/NE-ETHZ-501310/2020	2020-11-08	Europe / Switzerland / Neuchatel	Human		unknown	unknown	unknown	Original	Nasopharyngeal and oropharyngeal swab		B.1.160	GH	Illumina	V-pipe
EPI_ISL_1119766	hCoV-19/Switzerland/NE-ETHZ-501275/2020	2020-11-08	Europe / Switzerland / Neuchatel	Human		unknown	unknown	unknown	Original	Nasopharyngeal and oropharyngeal swab		B.1.160	GH	Illumina	V-pipe
EPI_ISL_1119767	hCoV-19/Switzerland/SO-ETHZ-501344/2020	2020-11-08	Europe / Switzerland / Solothurn	Human		unknown	unknown	unknown	Original	Nasopharyngeal and oropharyngeal swab		B.1.160	GH	Illumina	V-pipe
EPI_ISL_1119768	hCoV-19/Switzerland/SO-ETHZ-501334/2020	2020-11-08	Europe / Switzerland / Solothurn	Human		unknown	unknown	unknown	Original	Nasopharyngeal and oropharyngeal swab		B.1.177	GV	Illumina	V-pipe
EPI_ISL_1119770	hCoV-19/Switzerland/SO-ETHZ-501347/2020	2020-11-08	Europe / Switzerland / Solothurn	Human		unknown	unknown	unknown	Original	Nasopharyngeal and oropharyngeal swab		B.1.177.23	GV	Illumina	V-pipe
EPI_ISL_1119771	hCoV-19/Switzerland/SO-ETHZ-501333/2020	2020-11-08	Europe / Switzerland / Solothurn	Human		unknown	unknown	unknown	Original	Nasopharyngeal and oropharyngeal swab		B.1.160	GH	Illumina	V-pipe
EPI_ISL_1119773	hCoV-19/Switzerland/SO-ETHZ-501343/2020	2020-11-08	Europe / Switzerland / Solothurn	Human		unknown	unknown	unknown	Original	Nasopharyngeal and oropharyngeal swab		B.1.1.39	GR	Illumina	V-pipe
EPI_ISL_1119775	hCoV-19/Switzerland/SO-ETHZ-501348/2020	2020-11-08	Europe / Switzerland / Solothurn	Human		unknown	unknown	unknown	Original	Nasopharyngeal and oropharyngeal swab		B.1.177.23	GV	Illumina	V-pipe
EPI_ISL_1119776	hCoV-19/Switzerland/SO-ETHZ-501353/2020	2020-11-08	Europe / Switzerland / Solothurn	Human		unknown	unknown	unknown	Original	Nasopharyngeal and oropharyngeal swab		B.1.1.39	GR	Illumina	V-pipe
EPI_ISL_1119777	hCoV-19/Switzerland/SO-ETHZ-501361/2020	2020-11-08	Europe / Switzerland / Solothurn	Human		unknown	unknown	unknown	Original	Nasopharyngeal and oropharyngeal swab		B.1.177.23	GV	Illumina	V-pipe
EPI_ISL_1119778	hCoV-19/Switzerland/SO-ETHZ-501350/2020	2020-11-08	Europe / Switzerland / Solothurn	Human		unknown	unknown	unknown	Original	Nasopharyngeal and oropharyngeal swab		B.1.160	GH	Illumina	V-pipe
EPI_ISL_1119781	hCoV-19/Switzerland/SO-ETHZ-501364/2020	2020-11-08	Europe / Switzerland / Solothurn	Human		unknown	unknown	unknown	Original	Nasopharyngeal and oropharyngeal swab		B.1.236	G	Illumina	V-pipe
EPI_ISL_1119782	hCoV-19/Switzerland/SO-ETHZ-501359/2020	2020-11-08	Europe / Switzerland / Solothurn	Human		unknown	unknown	unknown	Original	Nasopharyngeal and oropharyngeal swab		B.1.1.39	GR	Illumina	V-pipe
EPI_ISL_1119784	hCoV-19/Switzerland/SO-ETHZ-501367/2020	2020-11-08	Europe / Switzerland / Solothurn	Human		unknown	unknown	unknown	Original	Nasopharyngeal and oropharyngeal swab		B.1.177	GV	Illumina	V-pipe
EPI_ISL_1119786	hCoV-19/Switzerland/SO-ETHZ-501370/2020	2020-11-08	Europe / Switzerland / Solothurn	Human		unknown	unknown	unknown	Original	Nasopharyngeal and oropharyngeal swab		B.1.160	GH	Illumina	V-pipe
EPI_ISL_1119787	hCoV-19/Switzerland/SO-ETHZ-501342/2020	2020-11-08	Europe / Switzerland / Solothurn	Human		unknown	unknown	unknown	Original	Nasopharyngeal and oropharyngeal swab		B.1.160	GH	Illumina	V-pipe
EPI_ISL_1119789	hCoV-19/Switzerland/SO-ETHZ-501336/2020	2020-11-08	Europe / Switzerland / Solothurn	Human		unknown	unknown	unknown	Original	Nasopharyngeal and oropharyngeal swab		B.1.160	GH	Illumina	V-pipe
EPI_ISL_1119790	hCoV-19/Switzerland/SO-ETHZ-501368/2020	2020-11-08	Europe / Switzerland / Solothurn	Human		unknown	unknown	unknown	Original	Nasopharyngeal and oropharyngeal swab		B.1.236	G	Illumina	V-pipe
EPI_ISL_1119792	hCoV-19/Switzerland/ZH-ETHZ-501319/2020	2020-11-08	Europe / Switzerland / Zurich	Human		unknown	unknown	unknown	Original	Nasopharyngeal and oropharyngeal swab		B.1.236	G	Illumina	V-pipe
EPI_ISL_1119793	hCoV-19/Switzerland/ZH-ETHZ-501300/2020	2020-11-08	Europe / Switzerland / Zurich	Human		unknown	unknown	unknown	Original	Nasopharyngeal and oropharyngeal swab		B.1.177	GV	Illumina	V-pipe
EPI_ISL_1119794	hCoV-19/Switzerland/ZH-ETHZ-501287/2020	2020-11-08	Europe / Switzerland / Zurich	Human		unknown	unknown	unknown	Original	Nasopharyngeal and oropharyngeal swab		B.1.160	GH	Illumina	V-pipe
EPI_ISL_1119795	hCoV-19/Switzerland/ZH-ETHZ-501305/2020	2020-11-08	Europe / Switzerland / Zurich	Human		unknown	unknown	unknown	Original	Nasopharyngeal and oropharyngeal swab		B.1.1.70	GR	Illumina	V-pipe
EPI_ISL_1119796	hCoV-19/Switzerland/ZH-ETHZ-501298/2020	2020-11-08	Europe / Switzerland / Zurich	Human		unknown	unknown	unknown	Original	Nasopharyngeal and oropharyngeal swab		B.1.177	GV	Illumina	V-pipe
EPI_ISL_1119798	hCoV-19/Switzerland/ZH-ETHZ-501293/2020	2020-11-08	Europe / Switzerland / Zurich	Human		unknown	unknown	unknown	Original	Nasopharyngeal and oropharyngeal swab		B.1.177	GV	Illumina	V-pipe
EPI_ISL_1119799	hCoV-19/Switzerland/ZH-ETHZ-501299/2020	2020-11-08	Europe / Switzerland / Zurich	Human		unknown	unknown	unknown	Original	Nasopharyngeal and oropharyngeal swab		B.1.221	G	Illumina	V-pipe
EPI_ISL_1119800	hCoV-19/Switzerland/ZH-ETHZ-501288/2020	2020-11-08	Europe / Switzerland / Zurich	Human		unknown	unknown	unknown	Original	Nasopharyngeal and oropharyngeal swab		B.1.160	GH	Illumina	V-pipe
EPI_ISL_1119801	hCoV-19/Switzerland/ZH-ETHZ-501303/2020	2020-11-08	Europe / Switzerland / Zurich	Human		unknown	unknown	unknown	Original	Nasopharyngeal and oropharyngeal swab		B.1.1	GR	Illumina	V-pipe
EPI_ISL_1119802	hCoV-19/Switzerland/ZH-ETHZ-501314/2020	2020-11-08	Europe / Switzerland / Zurich	Human		unknown	unknown	unknown	Original	Nasopharyngeal and oropharyngeal swab		B.1.177	GV	Illumina	V-pipe
EPI_ISL_1119804	hCoV-19/Switzerland/ZH-ETHZ-501306/2020	2020-11-08	Europe / Switzerland / Zurich	Human		unknown	unknown	unknown	Original	Nasopharyngeal and oropharyngeal swab		B.1.1.39	GR	Illumina	V-pipe
EPI_ISL_1119805	hCoV-19/Switzerland/AG-ETHZ-501399/2020	2020-11-09	Europe / Switzerland / Aargau	Human		unknown	unknown	unknown	Original	Nasopharyngeal and oropharyngeal swab		B.1.177	GV	Illumina	V-pipe
EPI_ISL_1119807	hCoV-19/Switzerland/AG-ETHZ-501380/2020	2020-11-09	Europe / Switzerland / Aargau	Human		unknown	unknown	unknown	Original	Nasopharyngeal and oropharyngeal swab		B.1.160	GH	Illumina	V-pipe
EPI_ISL_1119808	hCoV-19/Switzerland/AG-ETHZ-501457/2020	2020-11-09	Europe / Switzerland / Aargau	Human		unknown	unknown	unknown	Original	Nasopharyngeal and oropharyngeal swab		B.1.177	GV	Illumina	V-pipe
EPI_ISL_1119809	hCoV-19/Switzerland/AG-ETHZ-501078/2020	2020-11-09	Europe / Switzerland / Aargau	Human		unknown	unknown	unknown	Original	Nasopharyngeal and oropharyngeal swab		B.1.177	GV	Illumina	V-pipe
EPI_ISL_1119810	hCoV-19/Switzerland/AG-ETHZ-501456/2020	2020-11-09	Europe / Switzerland / Aargau	Human		unknown	unknown	unknown	Original	Nasopharyngeal and oropharyngeal swab		B.1.1.189	GR	Illumina	V-pipe
EPI_ISL_1119811	hCoV-19/Switzerland/BE-ETHZ-501417/2020	2020-11-09	Europe / Switzerland / Bern	Human		unknown	unknown	unknown	Original	Nasopharyngeal and oropharyngeal swab		B.1.177	GV	Illumina	V-pipe
EPI_ISL_1119812	hCoV-19/Switzerland/BE-ETHZ-500084/2020	2020-11-09	Europe / Switzerland / Bern	Human		unknown	unknown	unknown	Original	Nasopharyngeal and oropharyngeal swab		B.1.177	GV	Illumina	V-pipe
EPI_ISL_1119813	hCoV-19/Switzerland/BE-ETHZ-501413/2020	2020-11-09	Europe / Switzerland / Bern	Human		unknown	unknown	unknown	Original	Nasopharyngeal and oropharyngeal swab		B.1.177	GV	Illumina	V-pipe
EPI_ISL_1119814	hCoV-19/Switzerland/BE-ETHZ-501381/2020	2020-11-09	Europe / Switzerland / Bern	Human		unknown	unknown	unknown	Original	Nasopharyngeal and oropharyngeal swab		B.1.1.39	GR	Illumina	V-pipe
EPI_ISL_1119815	hCoV-19/Switzerland/BE-ETHZ-500064/2020	2020-11-09	Europe / Switzerland / Bern	Human		unknown	unknown	unknown	Original	Nasopharyngeal and oropharyngeal swab		B.1.160	GH	Illumina	V-pipe
EPI_ISL_1119817	hCoV-19/Switzerland/BE-ETHZ-500058/2020	2020-11-09	Europe / Switzerland / Bern	Human		unknown	unknown	unknown	Original	Nasopharyngeal and oropharyngeal swab		B.1.236	G	Illumina	V-pipe
EPI_ISL_1119818	hCoV-19/Switzerland/BE-ETHZ-500070/2020	2020-11-09	Europe / Switzerland / Bern	Human		unknown	unknown	unknown	Original	Nasopharyngeal and oropharyngeal swab		B.1.1.170	GR	Illumina	V-pipe
EPI_ISL_1119819	hCoV-19/Switzerland/BE-ETHZ-501527/2020	2020-11-09	Europe / Switzerland / Bern	Human		unknown	unknown	unknown	Original	Nasopharyngeal and oropharyngeal swab		B.1.177	GV	Illumina	V-pipe
EPI_ISL_1119822	hCoV-19/Switzerland/BL-ETHZ-501418/2020	2020-11-09	Europe / Switzerland / Basel-Landschaft	Human		unknown	unknown	unknown	Original	Nasopharyngeal and oropharyngeal swab		B.1.1.39	GR	Illumina	V-pipe
EPI_ISL_1119823	hCoV-19/Switzerland/BL-ETHZ-501414/2020	2020-11-09	Europe / Switzerland / Basel-Landschaft	Human		unknown	unknown	unknown	Original	Nasopharyngeal and oropharyngeal swab		B.1.177	GV	Illumina	V-pipe
EPI_ISL_1119825	hCoV-19/Switzerland/BL-ETHZ-501424/2020	2020-11-09	Europe / Switzerland / Basel-Landschaft	Human		unknown	unknown	unknown	Original	Nasopharyngeal and oropharyngeal swab		B.1.177	GV	Illumina	V-pipe
EPI_ISL_1119826	hCoV-19/Switzerland/BL-ETHZ-501382/2020	2020-11-09	Europe / Switzerland / Basel-Landschaft	Human		unknown	unknown	unknown	Original	Nasopharyngeal and oropharyngeal swab		B.1.160	GH	Illumina	V-pipe
EPI_ISL_1119828	hCoV-19/Switzerland/BL-ETHZ-501454/2020	2020-11-09	Europe / Switzerland / Basel-Landschaft	Human		unknown	unknown	unknown	Original	Nasopharyngeal and oropharyngeal swab		B.1.221	G	Illumina	V-pipe
EPI_ISL_1119829	hCoV-19/Switzerland/BS-ETHZ-501395/2020	2020-11-09	Europe / Switzerland / Basel-Stadt	Human		unknown	unknown	unknown	Original	Nasopharyngeal and oropharyngeal swab		B.1.36.1	GH	Illumina	V-pipe
EPI_ISL_1119830	hCoV-19/Switzerland/FR-ETHZ-500063/2020	2020-11-09	Europe / Switzerland / Fribourg	Human		unknown	unknown	unknown	Original	Nasopharyngeal and oropharyngeal swab		B.1.160	GH	Illumina	V-pipe
EPI_ISL_1119833	hCoV-19/Switzerland/GE-ETHZ-501415/2020	2020-11-09	Europe / Switzerland / Geneva	Human		unknown	unknown	unknown	Original	Nasopharyngeal and oropharyngeal swab		B.1.160	GH	Illumina	V-pipe
EPI_ISL_1119834	hCoV-19/Switzerland/GE-ETHZ-501389/2020	2020-11-09	Europe / Switzerland / Geneva	Human		unknown	unknown	unknown	Original	Nasopharyngeal and oropharyngeal swab		B.1.177	GV	Illumina	V-pipe
EPI_ISL_1119835	hCoV-19/Switzerland/LU-ETHZ-501425/2020	2020-11-09	Europe / Switzerland / Lucerne	Human		unknown	unknown	unknown	Original	Nasopharyngeal and oropharyngeal swab		B.1.177	GV	Illumina	V-pipe
EPI_ISL_1119838	hCoV-19/Switzerland/LU-ETHZ-501066/2020	2020-11-09	Europe / Switzerland / Lucerne	Human		unknown	unknown	unknown	Original	Nasopharyngeal and oropharyngeal swab		B.1.160	GH	Illumina	V-pipe
EPI_ISL_1119839	hCoV-19/Switzerland/NE-ETHZ-501398/2020	2020-11-09	Europe / Switzerland / Neuchatel	Human		unknown	unknown	unknown	Original	Nasopharyngeal and oropharyngeal swab		B.1.160	GH	Illumina	V-pipe
EPI_ISL_1119842	hCoV-19/Switzerland/NE-ETHZ-501402/2020	2020-11-09	Europe / Switzerland / Neuchatel	Human		unknown	unknown	unknown	Original	Nasopharyngeal and oropharyngeal swab		B.1.160	GH	Illumina	V-pipe
EPI_ISL_1119843	hCoV-19/Switzerland/NE-ETHZ-500069/2020	2020-11-09	Europe / Switzerland / Neuchatel	Human		unknown	unknown	unknown	Original	Nasopharyngeal and oropharyngeal swab		B.1.160	GH	Illumina	V-pipe
EPI_ISL_1119844	hCoV-19/Switzerland/NE-ETHZ-500075/2020	2020-11-09	Europe / Switzerland / Neuchatel	Human		unknown	unknown	unknown	Original	Nasopharyngeal and oropharyngeal swab		B.1.1.1	GR	Illumina	V-pipe
EPI_ISL_1119845	hCoV-19/Switzerland/NE-ETHZ-501392/2020	2020-11-09	Europe / Switzerland / Neuchatel	Human		unknown	unknown	unknown	Original	Nasopharyngeal and oropharyngeal swab		B.1.177	GV	Illumina	V-pipe
EPI_ISL_1119846	hCoV-19/Switzerland/NE-ETHZ-500061/2020	2020-11-09	Europe / Switzerland / Neuchatel	Human		unknown	unknown	unknown	Original	Nasopharyngeal and oropharyngeal swab		B.1.177	GV	Illumina	V-pipe
EPI_ISL_1119848	hCoV-19/Switzerland/NE-ETHZ-500072/2020	2020-11-09	Europe / Switzerland / Neuchatel	Human		unknown	unknown	unknown	Original	Nasopharyngeal and oropharyngeal swab		B.1.1.47	GR	Illumina	V-pipe
EPI_ISL_1119849	hCoV-19/Switzerland/NE-ETHZ-500076/2020	2020-11-09	Europe / Switzerland / Neuchatel	Human		unknown	unknown	unknown	Original	Nasopharyngeal and oropharyngeal swab		B.1.160	GH	Illumina	V-pipe
EPI_ISL_1119850	hCoV-19/Switzerland/NE-ETHZ-501400/2020	2020-11-09	Europe / Switzerland / Neuchatel	Human		unknown	unknown	unknown	Original	Nasopharyngeal and oropharyngeal swab		B.1.177	GV	Illumina	V-pipe
EPI_ISL_1119851	hCoV-19/Switzerland/NE-ETHZ-500079/2020	2020-11-09	Europe / Switzerland / Neuchatel	Human		unknown	unknown	unknown	Original	Nasopharyngeal and oropharyngeal swab		B.1.177	GV	Illumina	V-pipe
EPI_ISL_1119853	hCoV-19/Switzerland/NE-ETHZ-500065/2020	2020-11-09	Europe / Switzerland / Neuchatel	Human		unknown	unknown	unknown	Original	Nasopharyngeal and oropharyngeal swab		B.1.160	GH	Illumina	V-pipe
EPI_ISL_1119857	hCoV-19/Switzerland/NE-ETHZ-501327/2020	2020-11-09	Europe / Switzerland / Neuchatel	Human		unknown	unknown	unknown	Original	Nasopharyngeal and oropharyngeal swab		B.1.160	GH	Illumina	V-pipe
EPI_ISL_1119858	hCoV-19/Switzerland/NE-ETHZ-501375/2020	2020-11-09	Europe / Switzerland / Neuchatel	Human		unknown	unknown	unknown	Original	Nasopharyngeal and oropharyngeal swab		B.1.160	GH	Illumina	V-pipe
EPI_ISL_1119859	hCoV-19/Switzerland/SH-ETHZ-501189/2020	2020-11-09	Europe / Switzerland / Schaffhausen	Human		unknown	unknown	unknown	Original	Nasopharyngeal and oropharyngeal swab		B.1.1.39	GR	Illumina	V-pipe
EPI_ISL_1119860	hCoV-19/Switzerland/SH-ETHZ-501496/2020	2020-11-09	Europe / Switzerland / Schaffhausen	Human		unknown	unknown	unknown	Original	Nasopharyngeal and oropharyngeal swab		B.1.160	GH	Illumina	V-pipe
EPI_ISL_1119861	hCoV-19/Switzerland/SH-ETHZ-501482/2020	2020-11-09	Europe / Switzerland / Schaffhausen	Human		unknown	unknown	unknown	Original	Nasopharyngeal and oropharyngeal swab		B.1	G	Illumina	V-pipe
EPI_ISL_1119862	hCoV-19/Switzerland/SH-ETHZ-501505/2020	2020-11-09	Europe / Switzerland / Schaffhausen	Human		unknown	unknown	unknown	Original	Nasopharyngeal and oropharyngeal swab		B.1.1.37	GR	Illumina	V-pipe
EPI_ISL_1119863	hCoV-19/Switzerland/SH-ETHZ-501188/2020	2020-11-09	Europe / Switzerland / Schaffhausen	Human		unknown	unknown	unknown	Original	Nasopharyngeal and oropharyngeal swab		B.1.1.39	GR	Illumina	V-pipe
EPI_ISL_1119864	hCoV-19/Switzerland/SH-ETHZ-501448/2020	2020-11-09	Europe / Switzerland / Schaffhausen	Human		unknown	unknown	unknown	Original	Nasopharyngeal and oropharyngeal swab		B.1.1.37	GR	Illumina	V-pipe
EPI_ISL_1119865	hCoV-19/Switzerland/SH-ETHZ-501506/2020	2020-11-09	Europe / Switzerland / Schaffhausen	Human		unknown	unknown	unknown	Original	Nasopharyngeal and oropharyngeal swab		B.1.1.39	GR	Illumina	V-pipe
EPI_ISL_1119866	hCoV-19/Switzerland/SH-ETHZ-501480/2020	2020-11-09	Europe / Switzerland / Schaffhausen	Human		unknown	unknown	unknown	Original	Nasopharyngeal and oropharyngeal swab		B.1	G	Illumina	V-pipe
EPI_ISL_1119867	hCoV-19/Switzerland/SH-ETHZ-501485/2020	2020-11-09	Europe / Switzerland / Schaffhausen	Human		unknown	unknown	unknown	Original	Nasopharyngeal and oropharyngeal swab		B.1	G	Illumina	V-pipe
EPI_ISL_1119869	hCoV-19/Switzerland/SH-ETHZ-501427/2020	2020-11-09	Europe / Switzerland / Schaffhausen	Human		unknown	unknown	unknown	Original	Nasopharyngeal and oropharyngeal swab		B.1.177	GV	Illumina	V-pipe
EPI_ISL_1119870	hCoV-19/Switzerland/SH-ETHZ-501484/2020	2020-11-09	Europe / Switzerland / Schaffhausen	Human		unknown	unknown	unknown	Original	Nasopharyngeal and oropharyngeal swab		B.1.1.39	GR	Illumina	V-pipe
EPI_ISL_1119872	hCoV-19/Switzerland/SH-ETHZ-501447/2020	2020-11-09	Europe / Switzerland / Schaffhausen	Human		unknown	unknown	unknown	Original	Nasopharyngeal and oropharyngeal swab		B.1.177	GV	Illumina	V-pipe
EPI_ISL_1119873	hCoV-19/Switzerland/SH-ETHZ-501494/2020	2020-11-09	Europe / Switzerland / Schaffhausen	Human		unknown	unknown	unknown	Original	Nasopharyngeal and oropharyngeal swab		B.1	G	Illumina	V-pipe
EPI_ISL_1119874	hCoV-19/Switzerland/SH-ETHZ-501450/2020	2020-11-09	Europe / Switzerland / Schaffhausen	Human		unknown	unknown	unknown	Original	Nasopharyngeal and oropharyngeal swab		B.1	G	Illumina	V-pipe
EPI_ISL_1119875	hCoV-19/Switzerland/SH-ETHZ-501324/2020	2020-11-09	Europe / Switzerland / Schaffhausen	Human		unknown	unknown	unknown	Original	Nasopharyngeal and oropharyngeal swab		B.1.1.37	GR	Illumina	V-pipe
EPI_ISL_1119876	hCoV-19/Switzerland/SH-ETHZ-501491/2020	2020-11-09	Europe / Switzerland / Schaffhausen	Human		unknown	unknown	unknown	Original	Nasopharyngeal and oropharyngeal swab		B.1.1.39	GR	Illumina	V-pipe
EPI_ISL_1119879	hCoV-19/Switzerland/SO-ETHZ-501509/2020	2020-11-09	Europe / Switzerland / Solothurn	Human		unknown	unknown	unknown	Original	Nasopharyngeal and oropharyngeal swab		B.1.177	GV	Illumina	V-pipe
EPI_ISL_1119880	hCoV-19/Switzerland/SO-ETHZ-501510/2020	2020-11-09	Europe / Switzerland / Solothurn	Human		unknown	unknown	unknown	Original	Nasopharyngeal and oropharyngeal swab		B.1.160	GH	Illumina	V-pipe
EPI_ISL_1119881	hCoV-19/Switzerland/SO-ETHZ-501503/2020	2020-11-09	Europe / Switzerland / Solothurn	Human		unknown	unknown	unknown	Original	Nasopharyngeal and oropharyngeal swab		B.1.1.70	GR	Illumina	V-pipe
EPI_ISL_1119882	hCoV-19/Switzerland/SO-ETHZ-501507/2020	2020-11-09	Europe / Switzerland / Solothurn	Human		unknown	unknown	unknown	Original	Nasopharyngeal and oropharyngeal swab		B.1.36.1	GH	Illumina	V-pipe
EPI_ISL_1119884	hCoV-19/Switzerland/SO-ETHZ-501467/2020	2020-11-09	Europe / Switzerland / Solothurn	Human		unknown	unknown	unknown	Original	Nasopharyngeal and oropharyngeal swab		B.1.160	GH	Illumina	V-pipe
EPI_ISL_1119885	hCoV-19/Switzerland/SO-ETHZ-501504/2020	2020-11-09	Europe / Switzerland / Solothurn	Human		unknown	unknown	unknown	Original	Nasopharyngeal and oropharyngeal swab		B.1.36.1	GH	Illumina	V-pipe
EPI_ISL_1119887	hCoV-19/Switzerland/SZ-ETHZ-500082/2020	2020-11-09	Europe / Switzerland / Schwyz	Human		unknown	unknown	unknown	Original	Nasopharyngeal and oropharyngeal swab		B.1.1.39	GR	Illumina	V-pipe
EPI_ISL_1119889	hCoV-19/Switzerland/VD-ETHZ-501405/2020	2020-11-09	Europe / Switzerland / Vaud	Human		unknown	unknown	unknown	Original	Nasopharyngeal and oropharyngeal swab		B.1.146	G	Illumina	V-pipe
EPI_ISL_1119891	hCoV-19/Switzerland/VD-ETHZ-501412/2020	2020-11-09	Europe / Switzerland / Vaud	Human		unknown	unknown	unknown	Original	Nasopharyngeal and oropharyngeal swab		B.1.177	GV	Illumina	V-pipe
EPI_ISL_1119892	hCoV-19/Switzerland/VD-ETHZ-501486/2020	2020-11-09	Europe / Switzerland / Vaud	Human		unknown	unknown	unknown	Original	Nasopharyngeal and oropharyngeal swab		B.1.160	GH	Illumina	V-pipe
EPI_ISL_1119896	hCoV-19/Switzerland/ZH-ETHZ-501136/2020	2020-11-09	Europe / Switzerland / Zurich	Human		unknown	unknown	unknown	Original	Nasopharyngeal and oropharyngeal swab		B.1.1.162	GR	Illumina	V-pipe
EPI_ISL_1119898	hCoV-19/Switzerland/BL-ETHZ-501593/2020	2020-11-10	Europe / Switzerland / Basel-Landschaft	Human		unknown	unknown	unknown	Original	Nasopharyngeal and oropharyngeal swab		B.1.221	G	Illumina	V-pipe
EPI_ISL_1119903	hCoV-19/Switzerland/AG-ETHZ-500159/2020	2020-11-12	Europe / Switzerland / Aargau	Human		unknown	unknown	unknown	Original	Nasopharyngeal and oropharyngeal swab		B.1.177.23	GV	Illumina	V-pipe
EPI_ISL_1119904	hCoV-19/Switzerland/BE-ETHZ-500101/2020	2020-11-12	Europe / Switzerland / Bern	Human		unknown	unknown	unknown	Original	Nasopharyngeal and oropharyngeal swab		B.1.160	GH	Illumina	V-pipe
EPI_ISL_1119905	hCoV-19/Switzerland/BE-ETHZ-500160/2020	2020-11-12	Europe / Switzerland / Bern	Human		unknown	unknown	unknown	Original	Nasopharyngeal and oropharyngeal swab		B.1.160	GH	Illumina	V-pipe
EPI_ISL_1119908	hCoV-19/Switzerland/BL-ETHZ-500114/2020	2020-11-12	Europe / Switzerland / Basel-Landschaft	Human		unknown	unknown	unknown	Original	Nasopharyngeal and oropharyngeal swab		B.1.1.39	GR	Illumina	V-pipe
EPI_ISL_1119909	hCoV-19/Switzerland/BL-ETHZ-500118/2020	2020-11-12	Europe / Switzerland / Basel-Landschaft	Human		unknown	unknown	unknown	Original	Nasopharyngeal and oropharyngeal swab		B.1.177	GV	Illumina	V-pipe
EPI_ISL_1119910	hCoV-19/Switzerland/BL-ETHZ-500123/2020	2020-11-12	Europe / Switzerland / Basel-Landschaft	Human		unknown	unknown	unknown	Original	Nasopharyngeal and oropharyngeal swab		B.1.1.39	GR	Illumina	V-pipe
EPI_ISL_1119911	hCoV-19/Switzerland/BS-ETHZ-500158/2020	2020-11-12	Europe / Switzerland / Basel-Stadt	Human		unknown	unknown	unknown	Original	Nasopharyngeal and oropharyngeal swab		B.1.177	GV	Illumina	V-pipe
EPI_ISL_1119912	hCoV-19/Switzerland/FR-ETHZ-500117/2020	2020-11-12	Europe / Switzerland / Fribourg	Human		unknown	unknown	unknown	Original	Nasopharyngeal and oropharyngeal swab		B.1.258	G	Illumina	V-pipe
EPI_ISL_1119913	hCoV-19/Switzerland/GE-ETHZ-500104/2020	2020-11-12	Europe / Switzerland / Geneva	Human		unknown	unknown	unknown	Original	Nasopharyngeal and oropharyngeal swab		B.1.160	GH	Illumina	V-pipe
EPI_ISL_1119914	hCoV-19/Switzerland/NE-ETHZ-500128/2020	2020-11-12	Europe / Switzerland / Neuchatel	Human		unknown	unknown	unknown	Original	Nasopharyngeal and oropharyngeal swab		B.1.160	GH	Illumina	V-pipe
EPI_ISL_1119916	hCoV-19/Switzerland/SH-ETHZ-500122/2020	2020-11-12	Europe / Switzerland / Schaffhausen	Human		unknown	unknown	unknown	Original	Nasopharyngeal and oropharyngeal swab		B.1.177	GV	Illumina	V-pipe
EPI_ISL_1119917	hCoV-19/Switzerland/SH-ETHZ-500120/2020	2020-11-12	Europe / Switzerland / Schaffhausen	Human		unknown	unknown	unknown	Original	Nasopharyngeal and oropharyngeal swab		B.1.160	GH	Illumina	V-pipe
EPI_ISL_1119919	hCoV-19/Switzerland/SH-ETHZ-500107/2020	2020-11-12	Europe / Switzerland / Schaffhausen	Human		unknown	unknown	unknown	Original	Nasopharyngeal and oropharyngeal swab		B.1.1.247	GR	Illumina	V-pipe
EPI_ISL_1119920	hCoV-19/Switzerland/SH-ETHZ-500116/2020	2020-11-12	Europe / Switzerland / Schaffhausen	Human		unknown	unknown	unknown	Original	Nasopharyngeal and oropharyngeal swab		B.1.416.1	G	Illumina	V-pipe
EPI_ISL_1119921	hCoV-19/Switzerland/SH-ETHZ-500130/2020	2020-11-12	Europe / Switzerland / Schaffhausen	Human		unknown	unknown	unknown	Original	Nasopharyngeal and oropharyngeal swab		B.1.160	GH	Illumina	V-pipe
EPI_ISL_1119922	hCoV-19/Switzerland/SH-ETHZ-500121/2020	2020-11-12	Europe / Switzerland / Schaffhausen	Human		unknown	unknown	unknown	Original	Nasopharyngeal and oropharyngeal swab		B.1.221	G	Illumina	V-pipe
EPI_ISL_1119925	hCoV-19/Switzerland/SH-ETHZ-500125/2020	2020-11-12	Europe / Switzerland / Schaffhausen	Human		unknown	unknown	unknown	Original	Nasopharyngeal and oropharyngeal swab		B.1.1.247	GR	Illumina	V-pipe
EPI_ISL_1119926	hCoV-19/Switzerland/SO-ETHZ-500154/2020	2020-11-12	Europe / Switzerland / Solothurn	Human		unknown	unknown	unknown	Original	Nasopharyngeal and oropharyngeal swab		B.1.160	GH	Illumina	V-pipe
EPI_ISL_1119927	hCoV-19/Switzerland/SO-ETHZ-500140/2020	2020-11-12	Europe / Switzerland / Solothurn	Human		unknown	unknown	unknown	Original	Nasopharyngeal and oropharyngeal swab		B.1.474	GH	Illumina	V-pipe
EPI_ISL_1119930	hCoV-19/Switzerland/SO-ETHZ-500146/2020	2020-11-12	Europe / Switzerland / Solothurn	Human		unknown	unknown	unknown	Original	Nasopharyngeal and oropharyngeal swab		B.1.160	GH	Illumina	V-pipe
EPI_ISL_1119931	hCoV-19/Switzerland/SO-ETHZ-500157/2020	2020-11-12	Europe / Switzerland / Solothurn	Human		unknown	unknown	unknown	Original	Nasopharyngeal and oropharyngeal swab		B.1.160	GH	Illumina	V-pipe
EPI_ISL_1119932	hCoV-19/Switzerland/SO-ETHZ-500137/2020	2020-11-12	Europe / Switzerland / Solothurn	Human		unknown	unknown	unknown	Original	Nasopharyngeal and oropharyngeal swab		B.1.1.269	GR	Illumina	V-pipe
EPI_ISL_1119934	hCoV-19/Switzerland/SO-ETHZ-500142/2020	2020-11-12	Europe / Switzerland / Solothurn	Human		unknown	unknown	unknown	Original	Nasopharyngeal and oropharyngeal swab		B.1.160	GH	Illumina	V-pipe
EPI_ISL_1119935	hCoV-19/Switzerland/SO-ETHZ-500145/2020	2020-11-12	Europe / Switzerland / Solothurn	Human		unknown	unknown	unknown	Original	Nasopharyngeal and oropharyngeal swab		B.1.160	GH	Illumina	V-pipe
EPI_ISL_1119936	hCoV-19/Switzerland/SO-ETHZ-500147/2020	2020-11-12	Europe / Switzerland / Solothurn	Human		unknown	unknown	unknown	Original	Nasopharyngeal and oropharyngeal swab		B.1.177	GV	Illumina	V-pipe
EPI_ISL_1119937	hCoV-19/Switzerland/SO-ETHZ-500148/2020	2020-11-12	Europe / Switzerland / Solothurn	Human		unknown	unknown	unknown	Original	Nasopharyngeal and oropharyngeal swab		B.1.467	GH	Illumina	V-pipe
EPI_ISL_1119940	hCoV-19/Switzerland/SO-ETHZ-500135/2020	2020-11-12	Europe / Switzerland / Solothurn	Human		unknown	unknown	unknown	Original	Nasopharyngeal and oropharyngeal swab		B.1.160	GH	Illumina	V-pipe
EPI_ISL_1119941	hCoV-19/Switzerland/SO-ETHZ-500134/2020	2020-11-12	Europe / Switzerland / Solothurn	Human		unknown	unknown	unknown	Original	Nasopharyngeal and oropharyngeal swab		B.1.160	GH	Illumina	V-pipe
EPI_ISL_1119943	hCoV-19/Switzerland/SO-ETHZ-500133/2020	2020-11-12	Europe / Switzerland / Solothurn	Human		unknown	unknown	unknown	Original	Nasopharyngeal and oropharyngeal swab		B.1.160	GH	Illumina	V-pipe
EPI_ISL_1119944	hCoV-19/Switzerland/SO-ETHZ-500093/2020	2020-11-12	Europe / Switzerland / Solothurn	Human		unknown	unknown	unknown	Original	Nasopharyngeal and oropharyngeal swab		B.1.177	GV	Illumina	V-pipe
EPI_ISL_1119946	hCoV-19/Switzerland/SZ-ETHZ-500132/2020	2020-11-12	Europe / Switzerland / Schwyz	Human		unknown	unknown	unknown	Original	Nasopharyngeal and oropharyngeal swab		B.1.160	GH	Illumina	V-pipe
EPI_ISL_1119947	hCoV-19/Switzerland/SZ-ETHZ-500131/2020	2020-11-12	Europe / Switzerland / Schwyz	Human		unknown	unknown	unknown	Original	Nasopharyngeal and oropharyngeal swab		B.1.160	GH	Illumina	V-pipe
EPI_ISL_1119949	hCoV-19/Switzerland/VD-ETHZ-500149/2020	2020-11-12	Europe / Switzerland / Vaud	Human		unknown	unknown	unknown	Original	Nasopharyngeal and oropharyngeal swab		B.1.160	GH	Illumina	V-pipe
EPI_ISL_1119950	hCoV-19/Switzerland/VD-ETHZ-500099/2020	2020-11-12	Europe / Switzerland / Vaud	Human		unknown	unknown	unknown	Original	Nasopharyngeal and oropharyngeal swab		B.1.1.288	GR	Illumina	V-pipe
EPI_ISL_1119951	hCoV-19/Switzerland/ZH-ETHZ-500105/2020	2020-11-12	Europe / Switzerland / Zurich	Human		unknown	unknown	unknown	Original	Nasopharyngeal and oropharyngeal swab		B.1.177	GV	Illumina	V-pipe
EPI_ISL_1119952	hCoV-19/Switzerland/ZH-ETHZ-500163/2020	2020-11-12	Europe / Switzerland / Zurich	Human		unknown	unknown	unknown	Original	Nasopharyngeal and oropharyngeal swab		B.1.177.23	GV	Illumina	V-pipe
EPI_ISL_1122011	hCoV-19/USA/KY-KSPHL-100198/2020	2020-11-04	North America / USA / Kentucky	Human		Female	25	unknown	unknown	swab		B.1.240	G	Illumina MiSeq	Staph-B Toolkit Monroe	Insertion of 1 nucleotides when compared to the reference sequence.	info
EPI_ISL_1122012	hCoV-19/USA/KY-KSPHL-100199/2020	2020-11-04	North America / USA / Kentucky	Human		Female	52	unknown	unknown	swab		B.1.1.186	GR	Illumina MiSeq	Staph-B Toolkit Monroe
EPI_ISL_1122349	hCoV-19/Japan/PG-19852/2020	2020-11-13	Asia / Japan	Human		unknown	unknown	unknown	Original			B.1.1.86	GR	Illumina iSeq	A5-miseq v. 20140604
EPI_ISL_1122350	hCoV-19/Japan/PG-19853/2020	2020-11-15	Asia / Japan	Human		unknown	unknown	unknown	Original			B.1.1.86	GR	Illumina iSeq	SKESA v. 2.3.0
EPI_ISL_1122351	hCoV-19/Japan/PG-19854/2020	2020-11-15	Asia / Japan	Human		unknown	unknown	unknown	Original			B.1.1.86	GR	Illumina iSeq	A5-miseq v. 20140604
EPI_ISL_1122352	hCoV-19/Japan/PG-19855/2020	2020-11-15	Asia / Japan	Human		unknown	unknown	unknown	Original			B.1.1.86	GR	Illumina iSeq	A5-miseq v. 20140604
EPI_ISL_1122353	hCoV-19/Japan/PG-19856/2020	2020-11-19	Asia / Japan	Human		unknown	unknown	unknown	Original			B.1.1.86	GR	Illumina iSeq	bwa v. 0.7.13-r1126, picard v. 2.10.10, GATK v. 3.8.0, VarScan v. 2.4.3, VCFtools v. 0.1.12b, SKESA v. 2.3.0, A5-miseq v. 20140604
EPI_ISL_1122354	hCoV-19/Japan/PG-19857/2020	2020-11-19	Asia / Japan	Human		unknown	unknown	unknown	Original			B.1.1.86	GR	Illumina iSeq	A5-miseq v. 20140604
EPI_ISL_1123264	hCoV-19/Bangladesh/CU-CTG-03/2020	2020-11-28	Asia / Bangladesh / Chittagong / Rangamati	Human		Male	38	unknown	Original	Nasopharyngeal swab		B.1.1.103	GR	Illumina MiniSeq	DRAGEN RNA Pathogen Detection 3.5.15
EPI_ISL_1123266	hCoV-19/Bangladesh/CU-CTG-15/2020	2020-11-24	Asia / Bangladesh / Chittagong / Bandarban	Human		Male	30	unknown	Original	Nasopharyngeal swab		B.1.1.220	GR	Illumina MiniSeq	DRAGEN RNA Pathogen Detection 3.5.15
EPI_ISL_1123267	hCoV-19/Bangladesh/CU-CTG-16/2020	2020-11-24	Asia / Bangladesh / Chittagong / Bandarban	Human		Male	42	unknown	Original	Nasopharyngeal swab		B.1.1.103	GR	Illumina MiniSeq	DRAGEN RNA Pathogen Detection 3.5.15	NS8_E64stop results in 47.9% truncation of the protein sequence.	info
EPI_ISL_1123268	hCoV-19/Bangladesh/CU-CTG-23/2020	2020-11-09	Asia / Bangladesh / Chittagong / Khagrachari	Human		Male	55	unknown	Original	Nasopharyngeal swab		D.2	GR	Illumina MiniSeq	DRAGEN RNA Pathogen Detection 3.5.15
EPI_ISL_1123677	hCoV-19/Denmark/DCGC-48128/2020	2020-11-09	Europe / Denmark / Hovedstaden	Human		unknown	unknown	unknown	Original			B.1.160.8	GH	Oxford Nanopore	ARTIC-ncov2019 v1.1.0	Gap of 1 nucleotide(s) found at refpos 29588 (FRAMESHIFT confirmed by submitter).	info
EPI_ISL_1123816	hCoV-19/Denmark/DCGC-48189/2020	2020-11-30	Europe / Denmark / Hovedstaden	Human		unknown	unknown	unknown	Original					Oxford Nanopore	ARTIC-ncov2019 v1.1.0
EPI_ISL_1123862	hCoV-19/Denmark/DCGC-48210/2020	2020-11-30	Europe / Denmark / Hovedstaden	Human		unknown	unknown	unknown	Original			B.1.177.21	GV	Oxford Nanopore	ARTIC-ncov2019 v1.1.0
EPI_ISL_1123895	hCoV-19/Japan/PG-19655/2020	2020-11-03	Asia / Japan	Human		unknown	unknown	unknown	Original			B.1.1.214	GR	Illumina NextSeq2000	SKESA v. 2.3.0
EPI_ISL_1123897	hCoV-19/Japan/PG-19656/2020	2020-11-03	Asia / Japan	Human		unknown	unknown	unknown	Original			B.1.1.214	GR	Illumina NextSeq2000	SKESA v. 2.3.0
EPI_ISL_1123898	hCoV-19/Japan/PG-19657/2020	2020-11-12	Asia / Japan	Human		unknown	unknown	unknown	Original			B.1.1.214	GR	Illumina NextSeq2000	SKESA v. 2.3.0
EPI_ISL_1123899	hCoV-19/Denmark/DCGC-48226/2020	2020-11-30	Europe / Denmark / Hovedstaden	Human		unknown	unknown	unknown	Original					Oxford Nanopore	ARTIC-ncov2019 v1.1.0
EPI_ISL_1123900	hCoV-19/Japan/PG-19658/2020	2020-11-12	Asia / Japan	Human		unknown	unknown	unknown	Original			B.1.1.214	GR	Illumina NextSeq2000	SKESA v. 2.3.0
EPI_ISL_1123902	hCoV-19/Japan/PG-19659/2020	2020-11-23	Asia / Japan	Human		unknown	unknown	unknown	Original			B.1.1.284	GR	Illumina NextSeq2000	SKESA v. 2.3.0
EPI_ISL_1123904	hCoV-19/Japan/PG-19660/2020	2020-11-17	Asia / Japan	Human		unknown	unknown	unknown	Original			B.1.1.269	GR	Illumina NextSeq2000	SKESA v. 2.3.0
EPI_ISL_1123905	hCoV-19/Japan/PG-19661/2020	2020-11-17	Asia / Japan	Human		unknown	unknown	unknown	Original			B.1.1.269	GR	Illumina NextSeq2000	SKESA v. 2.3.0
EPI_ISL_1123907	hCoV-19/Japan/PG-19662/2020	2020-11-21	Asia / Japan	Human		unknown	unknown	unknown	Original			B.1.1.269	GR	Illumina NextSeq2000	SKESA v. 2.3.0
EPI_ISL_1123930	hCoV-19/Denmark/DCGC-48240/2020	2020-11-30	Europe / Denmark / Hovedstaden	Human		unknown	unknown	unknown	Original			B.1.258.11	G	Oxford Nanopore	ARTIC-ncov2019 v1.1.0	Gap of 6 nucleotides when compared to the reference sequence.	info
EPI_ISL_1123939	hCoV-19/Denmark/DCGC-48244/2020	2020-11-30	Europe / Denmark / Hovedstaden	Human		unknown	unknown	unknown	Original			B.1.177.21	GV	Oxford Nanopore	ARTIC-ncov2019 v1.1.0
EPI_ISL_1124132	hCoV-19/Denmark/DCGC-48328/2020	2020-11-30	Europe / Denmark / Hovedstaden	Human		unknown	unknown	unknown	Original			B.1.177.21	GV	Oxford Nanopore	ARTIC-ncov2019 v1.1.0
EPI_ISL_1124134	hCoV-19/Denmark/DCGC-48329/2020	2020-11-30	Europe / Denmark / Sjaelland	Human		unknown	unknown	unknown	Original			B.1.1.294	GR	Oxford Nanopore	ARTIC-ncov2019 v1.1.0
EPI_ISL_1124136	hCoV-19/Denmark/DCGC-48330/2020	2020-11-30	Europe / Denmark / Hovedstaden	Human		unknown	unknown	unknown	Original			B.1.1.70	GR	Oxford Nanopore	ARTIC-ncov2019 v1.1.0
EPI_ISL_1124169	hCoV-19/Denmark/DCGC-48345/2020	2020-11-30	Europe / Denmark / Hovedstaden	Human		unknown	unknown	unknown	Original			B.1.258	G	Oxford Nanopore	ARTIC-ncov2019 v1.1.0	Gap of 6 nucleotides when compared to the reference sequence.	info
EPI_ISL_1124199	hCoV-19/Japan/PG-19826/2020	2020-11-25	Asia / Japan	Human		unknown	unknown	unknown	Original			B.1.1.214	GR	Illumina NextSeq2000	SKESA v. 2.3.0
EPI_ISL_1124249	hCoV-19/Denmark/DCGC-48381/2020	2020-11-30	Europe / Denmark / Hovedstaden	Human		unknown	unknown	unknown	Original			B.1.160	GH	Oxford Nanopore	ARTIC-ncov2019 v1.1.0
EPI_ISL_1124326	hCoV-19/Denmark/DCGC-48417/2020	2020-11-30	Europe / Denmark / Hovedstaden	Human		unknown	unknown	unknown	Original			B.1.177.21	GV	Oxford Nanopore	ARTIC-ncov2019 v1.1.0
EPI_ISL_1124337	hCoV-19/Japan/PG-19911/2020	2020-11-13	Asia / Japan	Human		unknown	unknown	unknown	Original			B.1.1.214	GR	Illumina NextSeq500	A5-miseq v. 20140604
EPI_ISL_1124339	hCoV-19/Japan/PG-19912/2020	2020-11-13	Asia / Japan	Human		unknown	unknown	unknown	Original			B.1.1.214	GR	Illumina NextSeq500	SKESA v. 2.3.0
EPI_ISL_1124341	hCoV-19/Japan/PG-19913/2020	2020-11-14	Asia / Japan	Human		unknown	unknown	unknown	Original			B.1.1	GR	Illumina NextSeq500	SKESA v. 2.3.0
EPI_ISL_1124342	hCoV-19/Japan/PG-19914/2020	2020-11-14	Asia / Japan	Human		unknown	unknown	unknown	Original			B.1.1.214	GR	Illumina NextSeq500	SKESA v. 2.3.0
EPI_ISL_1124344	hCoV-19/Japan/PG-19915/2020	2020-11-14	Asia / Japan	Human		unknown	unknown	unknown	Original			B.1.1.214	GR	Illumina NextSeq500	SKESA v. 2.3.0
EPI_ISL_1124346	hCoV-19/Japan/PG-19916/2020	2020-11-17	Asia / Japan	Human		unknown	unknown	unknown	Original			B.1.1.214	GR	Illumina NextSeq500	SKESA v. 2.3.0
EPI_ISL_1124348	hCoV-19/Japan/PG-19917/2020	2020-11-22	Asia / Japan	Human		unknown	unknown	unknown	Original			B.1.1.214	GR	Illumina NextSeq500	A5-miseq v. 20140604
EPI_ISL_1124349	hCoV-19/Japan/PG-19918/2020	2020-11-28	Asia / Japan	Human		unknown	unknown	unknown	Original			B.1.1.284	GR	Illumina NextSeq500	SKESA v. 2.3.0
EPI_ISL_1124351	hCoV-19/Japan/PG-19919/2020	2020-11-28	Asia / Japan	Human		unknown	unknown	unknown	Original			B.1.1.214	GR	Illumina NextSeq500	SKESA v. 2.3.0
EPI_ISL_1124353	hCoV-19/Japan/PG-19920/2020	2020-11-29	Asia / Japan	Human		unknown	unknown	unknown	Original			B.1.1.214	GR	Illumina NextSeq500	SKESA v. 2.3.0
EPI_ISL_1124355	hCoV-19/Japan/PG-19921/2020	2020-11-29	Asia / Japan	Human		unknown	unknown	unknown	Original			B.1.1.214	GR	Illumina NextSeq500	A5-miseq v. 20140604
EPI_ISL_1124356	hCoV-19/Japan/PG-19922/2020	2020-11-29	Asia / Japan	Human		unknown	unknown	unknown	Original			B.1.1.214	GR	Illumina NextSeq500	SKESA v. 2.3.0
EPI_ISL_1124425	hCoV-19/Denmark/DCGC-48460/2020	2020-11-30	Europe / Denmark / Hovedstaden	Human		unknown	unknown	unknown	Original			B.1.258.11	G	Oxford Nanopore	ARTIC-ncov2019 v1.1.0	Gap of 6 nucleotides when compared to the reference sequence.	info
EPI_ISL_1124466	hCoV-19/Denmark/DCGC-48478/2020	2020-11-23	Europe / Denmark / Hovedstaden	Human		unknown	unknown	unknown	Original			B.1.177	GV	Oxford Nanopore	ARTIC-ncov2019 v1.1.0
EPI_ISL_1124473	hCoV-19/Denmark/DCGC-48481/2020	2020-11-30	Europe / Denmark / Hovedstaden	Human		unknown	unknown	unknown	Original			B.1.258.11	G	Oxford Nanopore	ARTIC-ncov2019 v1.1.0	Gap of 6 nucleotides when compared to the reference sequence.	info
EPI_ISL_1124508	hCoV-19/Japan/PG-20010/2020	2020-11-05	Asia / Japan	Human		unknown	unknown	unknown	Original			B.1.1.214	GR	Illumina NextSeq500	SKESA v. 2.3.0
EPI_ISL_1124510	hCoV-19/Japan/PG-20011/2020	2020-11-06	Asia / Japan	Human		unknown	unknown	unknown	Original			B.1.1.214	GR	Illumina NextSeq500	SKESA v. 2.3.0
EPI_ISL_1124512	hCoV-19/Japan/PG-20012/2020	2020-11-12	Asia / Japan	Human		unknown	unknown	unknown	Original			B.1.1.214	GR	Illumina NextSeq500	SKESA v. 2.3.0
EPI_ISL_1124514	hCoV-19/Japan/PG-20013/2020	2020-11-13	Asia / Japan	Human		unknown	unknown	unknown	Original			B.1.1.214	GR	Illumina NextSeq500	SKESA v. 2.3.0
EPI_ISL_1124516	hCoV-19/Japan/PG-20014/2020	2020-11-25	Asia / Japan	Human		unknown	unknown	unknown	Original			B.1.1.284	GR	Illumina NextSeq500	SKESA v. 2.3.0
EPI_ISL_1124649	hCoV-19/Denmark/DCGC-48558/2020	2020-11-30	Europe / Denmark / Hovedstaden	Human		unknown	unknown	unknown	Original			B.1.160	GH	Oxford Nanopore	ARTIC-ncov2019 v1.1.0
EPI_ISL_1124780	hCoV-19/Denmark/DCGC-48616/2020	2020-11-09	Europe / Denmark / Hovedstaden	Human		unknown	unknown	unknown	Original			B.1.160	GH	Oxford Nanopore	ARTIC-ncov2019 v1.1.0
EPI_ISL_1124790	hCoV-19/Denmark/DCGC-48620/2020	2020-11-30	Europe / Denmark / Hovedstaden	Human		unknown	unknown	unknown	Original			B.1.177.12	GV	Oxford Nanopore	ARTIC-ncov2019 v1.1.0	Gap of 1 nucleotides when compared to the reference sequence.	info
EPI_ISL_1125022	hCoV-19/Denmark/DCGC-48723/2020	2020-11-30	Europe / Denmark / Hovedstaden	Human		unknown	unknown	unknown	Original			B.1.1.70	GR	Oxford Nanopore	ARTIC-ncov2019 v1.1.0
EPI_ISL_1125024	hCoV-19/Denmark/DCGC-48724/2020	2020-11-30	Europe / Denmark / Hovedstaden	Human		unknown	unknown	unknown	Original			B.1.177.21	GV	Oxford Nanopore	ARTIC-ncov2019 v1.1.0
EPI_ISL_1125048	hCoV-19/Denmark/DCGC-48735/2020	2020-11-09	Europe / Denmark / Hovedstaden	Human		unknown	unknown	unknown	Original			B.1.160.8	GH	Oxford Nanopore	ARTIC-ncov2019 v1.1.0	Gap of 1 nucleotide(s) found at refpos 29588 (FRAMESHIFT confirmed by submitter).	info
EPI_ISL_1125075	hCoV-19/Denmark/DCGC-48747/2020	2020-11-30	Europe / Denmark / Sjaelland	Human		unknown	unknown	unknown	Original			B.1.177.21	GV	Oxford Nanopore	ARTIC-ncov2019 v1.1.0
EPI_ISL_1125080	hCoV-19/Denmark/DCGC-48749/2020	2020-11-30	Europe / Denmark / Hovedstaden	Human		unknown	unknown	unknown	Original			B.1.177.12	GV	Oxford Nanopore	ARTIC-ncov2019 v1.1.0
EPI_ISL_1125121	hCoV-19/Denmark/DCGC-48775/2020	2020-11-09	Europe / Denmark / Hovedstaden	Human		unknown	unknown	unknown	Original			B.1.177	GV	Oxford Nanopore	ARTIC-ncov2019 v1.1.0
EPI_ISL_1125199	hCoV-19/Denmark/DCGC-48853/2020	2020-11-23	Europe / Denmark / Hovedstaden	Human		unknown	unknown	unknown	Original			B.1.160.5	GH	Oxford Nanopore	ARTIC-ncov2019 v1.1.0
EPI_ISL_1125202	hCoV-19/Denmark/DCGC-48856/2020	2020-11-30	Europe / Denmark / Hovedstaden	Human		unknown	unknown	unknown	Original			B.1.36.9	GH	Oxford Nanopore	ARTIC-ncov2019 v1.1.0	Gap of 1 nucleotide(s) found at refpos 11083 (FRAMESHIFT confirmed by submitter). Gap of 4 nucleotides when compared to the reference sequence.	info
EPI_ISL_1125251	hCoV-19/Denmark/DCGC-48904/2020	2020-11-16	Europe / Denmark / Hovedstaden	Human		unknown	unknown	unknown	Original			B.1.177	GV	Oxford Nanopore	ARTIC-ncov2019 v1.1.0
EPI_ISL_1125292	hCoV-19/Denmark/DCGC-48924/2020	2020-11-30	Europe / Denmark / Hovedstaden	Human		unknown	unknown	unknown	Original			B.1.127	G	Oxford Nanopore	ARTIC-ncov2019 v1.1.0
EPI_ISL_1125333	hCoV-19/Denmark/DCGC-48947/2020	2020-11-30	Europe / Denmark / Hovedstaden	Human		unknown	unknown	unknown	Original			B.1.258	G	Oxford Nanopore	ARTIC-ncov2019 v1.1.0	Gap of 6 nucleotides when compared to the reference sequence.	info
EPI_ISL_1125452	hCoV-19/Denmark/DCGC-49063/2020	2020-11-30	Europe / Denmark / Hovedstaden	Human		unknown	unknown	unknown	Original			B.1.177.12	GV	Oxford Nanopore	ARTIC-ncov2019 v1.1.0
EPI_ISL_1125459	hCoV-19/Denmark/DCGC-49070/2020	2020-11-30	Europe / Denmark / Hovedstaden	Human		unknown	unknown	unknown	Original			B.1.177.21	GV	Oxford Nanopore	ARTIC-ncov2019 v1.1.0
EPI_ISL_1125464	hCoV-19/Denmark/DCGC-49075/2020	2020-11-30	Europe / Denmark / Hovedstaden	Human		unknown	unknown	unknown	Original			B.1.177.21	GV	Oxford Nanopore	ARTIC-ncov2019 v1.1.0
EPI_ISL_1125487	hCoV-19/Denmark/DCGC-49098/2020	2020-11-09	Europe / Denmark / Hovedstaden	Human		unknown	unknown	unknown	Original			B.1.160.8	GH	Oxford Nanopore	ARTIC-ncov2019 v1.1.0	Gap of 1 nucleotide(s) found at refpos 29588 (FRAMESHIFT confirmed by submitter).	info
EPI_ISL_1125505	hCoV-19/Denmark/DCGC-49116/2020	2020-11-23	Europe / Denmark / Hovedstaden	Human		unknown	unknown	unknown	Original			B.1.177	GV	Oxford Nanopore	ARTIC-ncov2019 v1.1.0
EPI_ISL_1125521	hCoV-19/Denmark/DCGC-49132/2020	2020-11-30	Europe / Denmark / Hovedstaden	Human		unknown	unknown	unknown	Original			B.1.177	GV	Oxford Nanopore	ARTIC-ncov2019 v1.1.0	Gap of 1 nucleotide(s) found at refpos 11083 (FRAMESHIFT confirmed by submitter).	info
EPI_ISL_1125548	hCoV-19/Denmark/DCGC-49159/2020	2020-11-30	Europe / Denmark / Hovedstaden	Human		unknown	unknown	unknown	Original			B.1.221	G	Oxford Nanopore	ARTIC-ncov2019 v1.1.0
EPI_ISL_1125564	hCoV-19/Denmark/DCGC-49175/2020	2020-11-30	Europe / Denmark / Hovedstaden	Human		unknown	unknown	unknown	Original			B.1.177.12	GV	Oxford Nanopore	ARTIC-ncov2019 v1.1.0
EPI_ISL_1125584	hCoV-19/Denmark/DCGC-49194/2020	2020-11-09	Europe / Denmark / Hovedstaden	Human		unknown	unknown	unknown	Original			B.1.160	GH	Oxford Nanopore	ARTIC-ncov2019 v1.1.0
EPI_ISL_1125618	hCoV-19/Denmark/DCGC-49228/2020	2020-11-30	Europe / Denmark / Hovedstaden	Human		unknown	unknown	unknown	Original			B.1.160	GH	Oxford Nanopore	ARTIC-ncov2019 v1.1.0	Gap of 9 nucleotides when compared to the reference sequence.	info
EPI_ISL_1125657	hCoV-19/Denmark/DCGC-49267/2020	2020-11-30	Europe / Denmark / Hovedstaden	Human		unknown	unknown	unknown	Original			B.1.258.11	G	Oxford Nanopore	ARTIC-ncov2019 v1.1.0	Gap of 6 nucleotides when compared to the reference sequence.	info
EPI_ISL_1125663	hCoV-19/Denmark/DCGC-49273/2020	2020-11-30	Europe / Denmark / Hovedstaden	Human		unknown	unknown	unknown	Original			B.1.36.25	GH	Oxford Nanopore	ARTIC-ncov2019 v1.1.0
EPI_ISL_1125683	hCoV-19/Denmark/DCGC-49293/2020	2020-11-23	Europe / Denmark / Hovedstaden	Human		unknown	unknown	unknown	Original			B.1	G	Oxford Nanopore	ARTIC-ncov2019 v1.1.0
EPI_ISL_1125702	hCoV-19/Denmark/DCGC-49312/2020	2020-11-30	Europe / Denmark / Hovedstaden	Human		unknown	unknown	unknown	Original			B.1.221	G	Oxford Nanopore	ARTIC-ncov2019 v1.1.0
EPI_ISL_1125744	hCoV-19/Denmark/DCGC-49354/2020	2020-11-23	Europe / Denmark / Hovedstaden	Human		unknown	unknown	unknown	Original			B.1.258.11	G	Oxford Nanopore	ARTIC-ncov2019 v1.1.0	Gap of 6 nucleotides when compared to the reference sequence.	info
EPI_ISL_1125795	hCoV-19/Denmark/DCGC-49405/2020	2020-11-30	Europe / Denmark / Hovedstaden	Human		unknown	unknown	unknown	Original			B.1.1.70	GR	Oxford Nanopore	ARTIC-ncov2019 v1.1.0
EPI_ISL_1125814	hCoV-19/Denmark/DCGC-49424/2020	2020-11-09	Europe / Denmark / Hovedstaden	Human		unknown	unknown	unknown	Original			B.1.177.21	GV	Oxford Nanopore	ARTIC-ncov2019 v1.1.0
EPI_ISL_1125857	hCoV-19/Denmark/DCGC-49467/2020	2020-11-30	Europe / Denmark / Hovedstaden	Human		unknown	unknown	unknown	Original			B.1.160	GH	Oxford Nanopore	ARTIC-ncov2019 v1.1.0	Gap of 9 nucleotides when compared to the reference sequence.	info
EPI_ISL_1125887	hCoV-19/Denmark/DCGC-49496/2020	2020-11-30	Europe / Denmark / Hovedstaden	Human		unknown	unknown	unknown	Original			B.1.160	GH	Oxford Nanopore	ARTIC-ncov2019 v1.1.0
EPI_ISL_1125891	hCoV-19/Denmark/DCGC-49500/2020	2020-11-30	Europe / Denmark / Sjaelland	Human		unknown	unknown	unknown	Original			B.1.177	GV	Oxford Nanopore	ARTIC-ncov2019 v1.1.0	NS7b_E39stop results in 11.6% truncation of the protein sequence.	info
EPI_ISL_1125908	hCoV-19/Denmark/DCGC-49517/2020	2020-11-30	Europe / Denmark / Hovedstaden	Human		unknown	unknown	unknown	Original			B.1.36.25	GH	Oxford Nanopore	ARTIC-ncov2019 v1.1.0
EPI_ISL_1125937	hCoV-19/Denmark/DCGC-49546/2020	2020-11-23	Europe / Denmark / Hovedstaden	Human		unknown	unknown	unknown	Original			B.1.36.25	GH	Oxford Nanopore	ARTIC-ncov2019 v1.1.0
EPI_ISL_1126007	hCoV-19/Denmark/DCGC-49616/2020	2020-11-30	Europe / Denmark / Hovedstaden	Human		unknown	unknown	unknown	Original			B.1.177.21	GV	Oxford Nanopore	ARTIC-ncov2019 v1.1.0
EPI_ISL_1126017	hCoV-19/Denmark/DCGC-49626/2020	2020-11-30	Europe / Denmark / Hovedstaden	Human		unknown	unknown	unknown	Original			B.1.160.8	GH	Oxford Nanopore	ARTIC-ncov2019 v1.1.0	Gap of 1 nucleotide(s) found at refpos 29588 (FRAMESHIFT confirmed by submitter).	info
EPI_ISL_1126033	hCoV-19/Denmark/DCGC-49642/2020	2020-11-30	Europe / Denmark / Hovedstaden	Human		unknown	unknown	unknown	Original			B.1.177.21	GV	Oxford Nanopore	ARTIC-ncov2019 v1.1.0
EPI_ISL_1126037	hCoV-19/Denmark/DCGC-49646/2020	2020-11-30	Europe / Denmark / Hovedstaden	Human		unknown	unknown	unknown	Original			B.1.221	G	Oxford Nanopore	ARTIC-ncov2019 v1.1.0
EPI_ISL_1126058	hCoV-19/Denmark/DCGC-49667/2020	2020-11-30	Europe / Denmark / Hovedstaden	Human		unknown	unknown	unknown	Original			B.1.177.21	GV	Oxford Nanopore	ARTIC-ncov2019 v1.1.0
EPI_ISL_1126153	hCoV-19/Denmark/DCGC-49762/2020	2020-11-30	Europe / Denmark / Hovedstaden	Human		unknown	unknown	unknown	Original			B.1.177	GV	Oxford Nanopore	ARTIC-ncov2019 v1.1.0
EPI_ISL_1126171	hCoV-19/Denmark/DCGC-49780/2020	2020-11-09	Europe / Denmark / Hovedstaden	Human		unknown	unknown	unknown	Original			B.1.177.21	GV	Oxford Nanopore	ARTIC-ncov2019 v1.1.0
EPI_ISL_1126176	hCoV-19/Denmark/DCGC-49785/2020	2020-11-09	Europe / Denmark / Hovedstaden	Human		unknown	unknown	unknown	Original			B.1.160.8	GH	Oxford Nanopore	ARTIC-ncov2019 v1.1.0	Gap of 1 nucleotide(s) found at refpos 29588 (FRAMESHIFT confirmed by submitter).	info
EPI_ISL_1126190	hCoV-19/Denmark/DCGC-49799/2020	2020-11-30	Europe / Denmark / Hovedstaden	Human		unknown	unknown	unknown	Original			B.1.177.12	GV	Oxford Nanopore	ARTIC-ncov2019 v1.1.0
EPI_ISL_1126201	hCoV-19/Denmark/DCGC-49810/2020	2020-11-30	Europe / Denmark / Hovedstaden	Human		unknown	unknown	unknown	Original			B.1.127	G	Oxford Nanopore	ARTIC-ncov2019 v1.1.0
EPI_ISL_1126218	hCoV-19/Denmark/DCGC-49827/2020	2020-11-30	Europe / Denmark / Hovedstaden	Human		unknown	unknown	unknown	Original			B.1.36.25	GH	Oxford Nanopore	ARTIC-ncov2019 v1.1.0
EPI_ISL_1126313	hCoV-19/Denmark/DCGC-49922/2020	2020-11-30	Europe / Denmark / Hovedstaden	Human		unknown	unknown	unknown	Original			B.1.221	G	Oxford Nanopore	ARTIC-ncov2019 v1.1.0	NS7a_Q94stop results in 23.1% truncation of the protein sequence.	info
EPI_ISL_1126372	hCoV-19/Denmark/DCGC-49981/2020	2020-11-30	Europe / Denmark / Hovedstaden	Human		unknown	unknown	unknown	Original			B.1.1.7	GRY	Oxford Nanopore	ARTIC-ncov2019 v1.1.0	NS8_K68stop results in 44.6% truncation of the protein sequence. NS8_Q27stop results in 78.5% truncation of the protein sequence. Gap of 19 nucleotides when compared to the reference sequence.	info
EPI_ISL_1126377	hCoV-19/Denmark/DCGC-49986/2020	2020-11-23	Europe / Denmark / Hovedstaden	Human		unknown	unknown	unknown	Original			B.1.177.21	GV	Oxford Nanopore	ARTIC-ncov2019 v1.1.0
EPI_ISL_1126560	hCoV-19/Denmark/DCGC-50169/2020	2020-11-30	Europe / Denmark / Hovedstaden	Human		unknown	unknown	unknown	Original			B.1.177.21	GV	Oxford Nanopore	ARTIC-ncov2019 v1.1.0
EPI_ISL_1126582	hCoV-19/Denmark/DCGC-50191/2020	2020-11-30	Europe / Denmark / Hovedstaden	Human		unknown	unknown	unknown	Original			B.1.177.21	GV	Oxford Nanopore	ARTIC-ncov2019 v1.1.0
EPI_ISL_1126656	hCoV-19/Denmark/DCGC-50265/2020	2020-11-23	Europe / Denmark / Hovedstaden	Human		unknown	unknown	unknown	Original			B.1.36.25	GH	Oxford Nanopore	ARTIC-ncov2019 v1.1.0
EPI_ISL_1126675	hCoV-19/Denmark/DCGC-50284/2020	2020-11-30	Europe / Denmark / Hovedstaden	Human		unknown	unknown	unknown	Original			B.1.1.70	GR	Oxford Nanopore	ARTIC-ncov2019 v1.1.0
EPI_ISL_1126699	hCoV-19/Denmark/DCGC-50308/2020	2020-11-30	Europe / Denmark / Hovedstaden	Human		unknown	unknown	unknown	Original			B.1.258	G	Oxford Nanopore	ARTIC-ncov2019 v1.1.0	Gap of 6 nucleotides when compared to the reference sequence.	info
EPI_ISL_1126753	hCoV-19/Denmark/DCGC-50362/2020	2020-11-30	Europe / Denmark / Hovedstaden	Human		unknown	unknown	unknown	Original			B.1.258	G	Oxford Nanopore	ARTIC-ncov2019 v1.1.0	Gap of 6 nucleotides when compared to the reference sequence.	info
EPI_ISL_1126760	hCoV-19/Denmark/DCGC-50369/2020	2020-11-30	Europe / Denmark / Hovedstaden	Human		unknown	unknown	unknown	Original			B.1	G	Oxford Nanopore	ARTIC-ncov2019 v1.1.0
EPI_ISL_1126790	hCoV-19/Denmark/DCGC-50399/2020	2020-11-30	Europe / Denmark / Hovedstaden	Human		unknown	unknown	unknown	Original			B.1.177.21	GV	Oxford Nanopore	ARTIC-ncov2019 v1.1.0
EPI_ISL_1126953	hCoV-19/Denmark/DCGC-50562/2020	2020-11-30	Europe / Denmark / Hovedstaden	Human		unknown	unknown	unknown	Original			B.1.221	G	Oxford Nanopore	ARTIC-ncov2019 v1.1.0
EPI_ISL_1126961	hCoV-19/Denmark/DCGC-50570/2020	2020-11-30	Europe / Denmark / Hovedstaden	Human		unknown	unknown	unknown	Original			B.1.177.21	GV	Oxford Nanopore	ARTIC-ncov2019 v1.1.0
EPI_ISL_1126962	hCoV-19/Denmark/DCGC-50571/2020	2020-11-30	Europe / Denmark / Hovedstaden	Human		unknown	unknown	unknown	Original			B.1.177.21	GV	Oxford Nanopore	ARTIC-ncov2019 v1.1.0
EPI_ISL_1126981	hCoV-19/Denmark/DCGC-50590/2020	2020-11-30	Europe / Denmark / Hovedstaden	Human		unknown	unknown	unknown	Original			B.1.177.21	GV	Oxford Nanopore	ARTIC-ncov2019 v1.1.0
EPI_ISL_1127014	hCoV-19/Denmark/DCGC-50623/2020	2020-11-30	Europe / Denmark / Hovedstaden	Human		unknown	unknown	unknown	Original			B.1.1.302	GR	Oxford Nanopore	ARTIC-ncov2019 v1.1.0
EPI_ISL_1127015	hCoV-19/Denmark/DCGC-50624/2020	2020-11-16	Europe / Denmark / Nordjylland	Human		unknown	unknown	unknown	Original			B.1.1.70	GR	Oxford Nanopore	ARTIC-ncov2019 v1.1.0
EPI_ISL_1127119	hCoV-19/Japan/PG-18874/2020	2020-11-20	Asia / Japan	Human		unknown	unknown	unknown	Original			B.1.1.101	GR	Illumina NextSeq500	SKESA v. 2.3.0	NS8_W45stop results in 63.6% truncation of the protein sequence.	info
EPI_ISL_1127120	hCoV-19/Japan/PG-18875/2020	2020-11-20	Asia / Japan	Human		unknown	unknown	unknown	Original			B.1.1.101	GR	Illumina NextSeq500	SKESA v. 2.3.0	NS8_W45stop results in 63.6% truncation of the protein sequence.	info
EPI_ISL_1127155	hCoV-19/Japan/PG-18898/2020	2020-11-30	Asia / Japan	Human		unknown	unknown	unknown	Original			B.1.1.130	GR	Illumina NextSeq500	SKESA v. 2.3.0	Gap of 151 nucleotide(s) found at refpos 28003 (frameshift confirmed by the submitter). NS8_C37stop results in 70.2% truncation of the protein sequence. %UniqueMutations 0.07%.	info
EPI_ISL_1127157	hCoV-19/Japan/PG-19202/2020	2020-11-29	Asia / Japan	Human		unknown	unknown	unknown	Original			B.1.1.214	GR	Illumina NextSeq500	SKESA v. 2.3.0	Gap of 11 nucleotides when compared to the reference sequence.	info
EPI_ISL_1127396	hCoV-19/Japan/PG-18544/2020	2020-11-10	Asia / Japan	Human		unknown	unknown	unknown	Original			B.1.1.284	GR	Illumina NextSeq2000	SKESA v. 2.3.0
EPI_ISL_1127397	hCoV-19/Japan/PG-18545/2020	2020-11-10	Asia / Japan	Human		unknown	unknown	unknown	Original			B.1.1.284	GR	Illumina NextSeq2000	A5-miseq v. 20140604
EPI_ISL_1127398	hCoV-19/Japan/PG-18546/2020	2020-11-10	Asia / Japan	Human		unknown	unknown	unknown	Original			B.1.1.284	GR	Illumina NextSeq2000	SKESA v. 2.3.0
EPI_ISL_1127399	hCoV-19/Japan/PG-18547/2020	2020-11-10	Asia / Japan	Human		unknown	unknown	unknown	Original			B.1.1.284	GR	Illumina NextSeq2000	SKESA v. 2.3.0
EPI_ISL_1127400	hCoV-19/Japan/PG-18548/2020	2020-11-11	Asia / Japan	Human		unknown	unknown	unknown	Original			B.1.1.284	GR	Illumina NextSeq2000	SKESA v. 2.3.0
EPI_ISL_1127401	hCoV-19/Japan/PG-18549/2020	2020-11-11	Asia / Japan	Human		unknown	unknown	unknown	Original			B.1.1.284	GR	Illumina NextSeq2000	SKESA v. 2.3.0
EPI_ISL_1127402	hCoV-19/Japan/PG-18550/2020	2020-11-11	Asia / Japan	Human		unknown	unknown	unknown	Original			B.1.1.284	GR	Illumina NextSeq2000	SKESA v. 2.3.0
EPI_ISL_1127403	hCoV-19/Japan/PG-18551/2020	2020-11-12	Asia / Japan	Human		unknown	unknown	unknown	Original			B.1.1.284	GR	Illumina NextSeq2000	SKESA v. 2.3.0
EPI_ISL_1127404	hCoV-19/Japan/PG-18552/2020	2020-11-12	Asia / Japan	Human		unknown	unknown	unknown	Original			B.1.1.284	GR	Illumina NextSeq2000	A5-miseq v. 20140604
EPI_ISL_1127405	hCoV-19/Japan/PG-18553/2020	2020-11-12	Asia / Japan	Human		unknown	unknown	unknown	Original			B.1.1.284	GR	Illumina NextSeq2000	A5-miseq v. 20140604
EPI_ISL_1127406	hCoV-19/Japan/PG-18554/2020	2020-11-12	Asia / Japan	Human		unknown	unknown	unknown	Original			B.1.1.284	GR	Illumina NextSeq2000	SKESA v. 2.3.0
EPI_ISL_1127407	hCoV-19/Japan/PG-18555/2020	2020-11-12	Asia / Japan	Human		unknown	unknown	unknown	Original			B.1.1.284	GR	Illumina NextSeq2000	bwa v. 0.7.13-r1126, picard v. 2.10.10, GATK v. 3.8.0, VarScan v. 2.4.3, VCFtools v. 0.1.12b, SKESA v. 2.3.0, A5-miseq v. 20140604
EPI_ISL_1127408	hCoV-19/Japan/PG-18556/2020	2020-11-12	Asia / Japan	Human		unknown	unknown	unknown	Original			B.1.1.284	GR	Illumina NextSeq2000	SKESA v. 2.3.0
EPI_ISL_1127409	hCoV-19/Japan/PG-18557/2020	2020-11-12	Asia / Japan	Human		unknown	unknown	unknown	Original			B.1.1.284	GR	Illumina NextSeq2000	SKESA v. 2.3.0
EPI_ISL_1127410	hCoV-19/Japan/PG-18558/2020	2020-11-12	Asia / Japan	Human		unknown	unknown	unknown	Original			B.1.1.284	GR	Illumina NextSeq2000	A5-miseq v. 20140604
EPI_ISL_1127411	hCoV-19/Japan/PG-18559/2020	2020-11-13	Asia / Japan	Human		unknown	unknown	unknown	Original			B.1.1.284	GR	Illumina NextSeq2000	SKESA v. 2.3.0
EPI_ISL_1127412	hCoV-19/Japan/PG-18560/2020	2020-11-13	Asia / Japan	Human		unknown	unknown	unknown	Original			B.1.1.284	GR	Illumina NextSeq2000	SKESA v. 2.3.0
EPI_ISL_1127413	hCoV-19/Japan/PG-18561/2020	2020-11-13	Asia / Japan	Human		unknown	unknown	unknown	Original			B.1.1.284	GR	Illumina NextSeq2000	SKESA v. 2.3.0
EPI_ISL_1127414	hCoV-19/Japan/PG-18562/2020	2020-11-13	Asia / Japan	Human		unknown	unknown	unknown	Original			B.1.1.284	GR	Illumina NextSeq2000	SKESA v. 2.3.0
EPI_ISL_1127415	hCoV-19/Japan/PG-18563/2020	2020-11-13	Asia / Japan	Human		unknown	unknown	unknown	Original			B.1.1.284	GR	Illumina NextSeq2000	SKESA v. 2.3.0
EPI_ISL_1127416	hCoV-19/Japan/PG-18564/2020	2020-11-13	Asia / Japan	Human		unknown	unknown	unknown	Original			B.1.1.284	GR	Illumina NextSeq2000	A5-miseq v. 20140604
EPI_ISL_1127417	hCoV-19/Japan/PG-18565/2020	2020-11-13	Asia / Japan	Human		unknown	unknown	unknown	Original			B.1.1.284	GR	Illumina NextSeq2000	SKESA v. 2.3.0
EPI_ISL_1127418	hCoV-19/Japan/PG-18566/2020	2020-11-13	Asia / Japan	Human		unknown	unknown	unknown	Original			B.1.1.284	GR	Illumina NextSeq2000	SKESA v. 2.3.0
EPI_ISL_1127419	hCoV-19/Japan/PG-18567/2020	2020-11-14	Asia / Japan	Human		unknown	unknown	unknown	Original			B.1.1.284	GR	Illumina NextSeq2000	SKESA v. 2.3.0
EPI_ISL_1127420	hCoV-19/Japan/PG-18570/2020	2020-11-14	Asia / Japan	Human		unknown	unknown	unknown	Original			B.1.1.284	GR	Illumina NextSeq2000	SKESA v. 2.3.0
EPI_ISL_1127421	hCoV-19/Japan/PG-18571/2020	2020-11-14	Asia / Japan	Human		unknown	unknown	unknown	Original			B.1.1.284	GR	Illumina NextSeq2000	SKESA v. 2.3.0
EPI_ISL_1127422	hCoV-19/Japan/PG-18572/2020	2020-11-16	Asia / Japan	Human		unknown	unknown	unknown	Original			B.1.1.284	GR	Illumina NextSeq2000	SKESA v. 2.3.0
EPI_ISL_1127423	hCoV-19/Japan/PG-18573/2020	2020-11-16	Asia / Japan	Human		unknown	unknown	unknown	Original			B.1.1.284	GR	Illumina NextSeq2000	A5-miseq v. 20140604
EPI_ISL_1127424	hCoV-19/Japan/PG-18575/2020	2020-11-16	Asia / Japan	Human		unknown	unknown	unknown	Original			B.1.1.284	GR	Illumina NextSeq2000	SKESA v. 2.3.0
EPI_ISL_1127425	hCoV-19/Japan/PG-18576/2020	2020-11-16	Asia / Japan	Human		unknown	unknown	unknown	Original			B.1.1.284	GR	Illumina NextSeq2000	SKESA v. 2.3.0
EPI_ISL_1127426	hCoV-19/Japan/PG-18577/2020	2020-11-18	Asia / Japan	Human		unknown	unknown	unknown	Original			B.1.1.284	GR	Illumina NextSeq2000	SKESA v. 2.3.0
EPI_ISL_1127427	hCoV-19/Japan/PG-18578/2020	2020-11-19	Asia / Japan	Human		unknown	unknown	unknown	Original			B.1.1.284	GR	Illumina NextSeq2000	SKESA v. 2.3.0
EPI_ISL_1127428	hCoV-19/Japan/PG-18579/2020	2020-11-19	Asia / Japan	Human		unknown	unknown	unknown	Original			B.1.1.284	GR	Illumina NextSeq2000	SKESA v. 2.3.0
EPI_ISL_1127429	hCoV-19/Japan/PG-18580/2020	2020-11-19	Asia / Japan	Human		unknown	unknown	unknown	Original			B.1.1.284	GR	Illumina NextSeq2000	A5-miseq v. 20140604
EPI_ISL_1127430	hCoV-19/Japan/PG-18581/2020	2020-11-19	Asia / Japan	Human		unknown	unknown	unknown	Original			B.1.1.284	GR	Illumina NextSeq2000	SKESA v. 2.3.0
EPI_ISL_1127431	hCoV-19/Japan/PG-18582/2020	2020-11-20	Asia / Japan	Human		unknown	unknown	unknown	Original			B.1.1.284	GR	Illumina NextSeq2000	SKESA v. 2.3.0
EPI_ISL_1127432	hCoV-19/Japan/PG-18583/2020	2020-11-20	Asia / Japan	Human		unknown	unknown	unknown	Original			B.1.1.284	GR	Illumina NextSeq2000	SKESA v. 2.3.0
EPI_ISL_1127433	hCoV-19/Japan/PG-18585/2020	2020-11-21	Asia / Japan	Human		unknown	unknown	unknown	Original			B.1.1.284	GR	Illumina NextSeq2000	SKESA v. 2.3.0
EPI_ISL_1127434	hCoV-19/Japan/PG-18586/2020	2020-11-21	Asia / Japan	Human		unknown	unknown	unknown	Original			B.1.1.284	GR	Illumina NextSeq2000	SKESA v. 2.3.0
EPI_ISL_1127435	hCoV-19/Japan/PG-18587/2020	2020-11-21	Asia / Japan	Human		unknown	unknown	unknown	Original			B.1.1.284	GR	Illumina NextSeq2000	SKESA v. 2.3.0
EPI_ISL_1127436	hCoV-19/Japan/PG-18588/2020	2020-11-21	Asia / Japan	Human		unknown	unknown	unknown	Original			B.1.1.284	GR	Illumina NextSeq2000	SKESA v. 2.3.0
EPI_ISL_1127437	hCoV-19/Japan/PG-18589/2020	2020-11-21	Asia / Japan	Human		unknown	unknown	unknown	Original			B.1.1.284	GR	Illumina NextSeq2000	SKESA v. 2.3.0
EPI_ISL_1127438	hCoV-19/Japan/PG-18590/2020	2020-11-21	Asia / Japan	Human		unknown	unknown	unknown	Original			B.1.1.284	GR	Illumina NextSeq2000	SKESA v. 2.3.0
EPI_ISL_1127439	hCoV-19/Japan/PG-18591/2020	2020-11-23	Asia / Japan	Human		unknown	unknown	unknown	Original			B.1.1.284	GR	Illumina NextSeq2000	SKESA v. 2.3.0
EPI_ISL_1127440	hCoV-19/Japan/PG-18592/2020	2020-11-23	Asia / Japan	Human		unknown	unknown	unknown	Original			B.1.1.284	GR	Illumina NextSeq2000	SKESA v. 2.3.0
EPI_ISL_1127441	hCoV-19/Japan/PG-18593/2020	2020-11-23	Asia / Japan	Human		unknown	unknown	unknown	Original			B.1.1.284	GR	Illumina NextSeq2000	SKESA v. 2.3.0
EPI_ISL_1127442	hCoV-19/Japan/PG-18594/2020	2020-11-22	Asia / Japan	Human		unknown	unknown	unknown	Original			B.1.1.284	GR	Illumina NextSeq2000	A5-miseq v. 20140604
EPI_ISL_1127443	hCoV-19/Japan/PG-18595/2020	2020-11-22	Asia / Japan	Human		unknown	unknown	unknown	Original			B.1.1.284	GR	Illumina NextSeq2000	SKESA v. 2.3.0
EPI_ISL_1127444	hCoV-19/Japan/PG-18596/2020	2020-11-23	Asia / Japan	Human		unknown	unknown	unknown	Original			B.1.1.284	GR	Illumina NextSeq2000	SKESA v. 2.3.0
EPI_ISL_1127445	hCoV-19/Japan/PG-18597/2020	2020-11-24	Asia / Japan	Human		unknown	unknown	unknown	Original			B.1.1.284	GR	Illumina NextSeq2000	SKESA v. 2.3.0
EPI_ISL_1127446	hCoV-19/Japan/PG-18598/2020	2020-11-24	Asia / Japan	Human		unknown	unknown	unknown	Original			B.1.1.284	GR	Illumina NextSeq2000	SKESA v. 2.3.0
EPI_ISL_1127447	hCoV-19/Japan/PG-18599/2020	2020-11-25	Asia / Japan	Human		unknown	unknown	unknown	Original			B.1.1.214	GR	Illumina NextSeq2000	SKESA v. 2.3.0
EPI_ISL_1127448	hCoV-19/Japan/PG-18601/2020	2020-11-28	Asia / Japan	Human		unknown	unknown	unknown	Original			B.1.1.284	GR	Illumina NextSeq2000	SKESA v. 2.3.0
EPI_ISL_1127449	hCoV-19/Japan/PG-18602/2020	2020-11-28	Asia / Japan	Human		unknown	unknown	unknown	Original			B.1.1.284	GR	Illumina NextSeq2000	SKESA v. 2.3.0
EPI_ISL_1127450	hCoV-19/Japan/PG-18603/2020	2020-11-28	Asia / Japan	Human		unknown	unknown	unknown	Original			B.1.1.284	GR	Illumina NextSeq2000	SKESA v. 2.3.0
EPI_ISL_1127451	hCoV-19/Japan/PG-18604/2020	2020-11-30	Asia / Japan	Human		unknown	unknown	unknown	Original			B.1.1.284	GR	Illumina NextSeq2000	A5-miseq v. 20140604
EPI_ISL_1127681	hCoV-19/Japan/PG-18839/2020	2020-11-02	Asia / Japan	Human		unknown	unknown	unknown	Original			B.1.1.214	GR	Illumina NextSeq500	SKESA v. 2.3.0
EPI_ISL_1127682	hCoV-19/Japan/PG-18840/2020	2020-11-02	Asia / Japan	Human		unknown	unknown	unknown	Original			B.1.1.284	GR	Illumina NextSeq500	SKESA v. 2.3.0
EPI_ISL_1127683	hCoV-19/Japan/PG-18841/2020	2020-11-03	Asia / Japan	Human		unknown	unknown	unknown	Original			B.1.1.214	GR	Illumina NextSeq500	A5-miseq v. 20140604
EPI_ISL_1127684	hCoV-19/Japan/PG-18842/2020	2020-11-03	Asia / Japan	Human		unknown	unknown	unknown	Original			B.1.1.209	GR	Illumina NextSeq500	SKESA v. 2.3.0
EPI_ISL_1127685	hCoV-19/Japan/PG-18843/2020	2020-11-04	Asia / Japan	Human		unknown	unknown	unknown	Original			B.1.1.214	GR	Illumina NextSeq500	A5-miseq v. 20140604
EPI_ISL_1127686	hCoV-19/Japan/PG-18844/2020	2020-11-05	Asia / Japan	Human		unknown	unknown	unknown	Original			B.1.1.284	GR	Illumina NextSeq500	SKESA v. 2.3.0
EPI_ISL_1127687	hCoV-19/Japan/PG-18845/2020	2020-11-04	Asia / Japan	Human		unknown	unknown	unknown	Original			B.1.1.214	GR	Illumina NextSeq500	SKESA v. 2.3.0
EPI_ISL_1127688	hCoV-19/Japan/PG-18846/2020	2020-11-04	Asia / Japan	Human		unknown	unknown	unknown	Original			B.1.1.214	GR	Illumina NextSeq500	SKESA v. 2.3.0
EPI_ISL_1127689	hCoV-19/Japan/PG-18847/2020	2020-11-05	Asia / Japan	Human		unknown	unknown	unknown	Original			B.1.1.284	GR	Illumina NextSeq500	bwa v. 0.7.13-r1126, picard v. 2.10.10, GATK v. 3.8.0, VarScan v. 2.4.3, VCFtools v. 0.1.12b, SKESA v. 2.3.0, A5-miseq v. 20140604
EPI_ISL_1127690	hCoV-19/Japan/PG-18848/2020	2020-11-05	Asia / Japan	Human		unknown	unknown	unknown	Original			B.1.1.284	GR	Illumina NextSeq500	SKESA v. 2.3.0
EPI_ISL_1127691	hCoV-19/Japan/PG-18849/2020	2020-11-07	Asia / Japan	Human		unknown	unknown	unknown	Original			B.1.1.214	GR	Illumina NextSeq500	SKESA v. 2.3.0
EPI_ISL_1127692	hCoV-19/Japan/PG-18850/2020	2020-11-09	Asia / Japan	Human		unknown	unknown	unknown	Original			B.1.1.284	GR	Illumina NextSeq500	SKESA v. 2.3.0
EPI_ISL_1127693	hCoV-19/Japan/PG-18851/2020	2020-11-10	Asia / Japan	Human		unknown	unknown	unknown	Original			B.1.1.214	GR	Illumina NextSeq500	SKESA v. 2.3.0
EPI_ISL_1127694	hCoV-19/Japan/PG-18852/2020	2020-11-11	Asia / Japan	Human		unknown	unknown	unknown	Original			B.1.1.214	GR	Illumina NextSeq500	SKESA v. 2.3.0
EPI_ISL_1127695	hCoV-19/Japan/PG-18853/2020	2020-11-11	Asia / Japan	Human		unknown	unknown	unknown	Original			B.1.1.214	GR	Illumina NextSeq500	bwa v. 0.7.13-r1126, picard v. 2.10.10, GATK v. 3.8.0, VarScan v. 2.4.3, VCFtools v. 0.1.12b, SKESA v. 2.3.0, A5-miseq v. 20140604
EPI_ISL_1127696	hCoV-19/Japan/PG-18854/2020	2020-11-12	Asia / Japan	Human		unknown	unknown	unknown	Original			B.1.1.220	GR	Illumina NextSeq500	SKESA v. 2.3.0
EPI_ISL_1127697	hCoV-19/Japan/PG-18855/2020	2020-11-13	Asia / Japan	Human		unknown	unknown	unknown	Original			B.1.1.214	GR	Illumina NextSeq500	SKESA v. 2.3.0
EPI_ISL_1127698	hCoV-19/Japan/PG-18856/2020	2020-11-13	Asia / Japan	Human		unknown	unknown	unknown	Original			B.1.1.214	GR	Illumina NextSeq500	SKESA v. 2.3.0
EPI_ISL_1127699	hCoV-19/Japan/PG-18857/2020	2020-11-14	Asia / Japan	Human		unknown	unknown	unknown	Original			B.1.1.214	GR	Illumina NextSeq500	A5-miseq v. 20140604
EPI_ISL_1127700	hCoV-19/Japan/PG-18858/2020	2020-11-14	Asia / Japan	Human		unknown	unknown	unknown	Original			B.1.1.214	GR	Illumina NextSeq500	SKESA v. 2.3.0
EPI_ISL_1127701	hCoV-19/Japan/PG-18859/2020	2020-11-15	Asia / Japan	Human		unknown	unknown	unknown	Original			B.1.1.214	GR	Illumina NextSeq500	SKESA v. 2.3.0
EPI_ISL_1127702	hCoV-19/Japan/PG-18860/2020	2020-11-15	Asia / Japan	Human		unknown	unknown	unknown	Original			B.1.1.214	GR	Illumina NextSeq500	A5-miseq v. 20140604
EPI_ISL_1127703	hCoV-19/Japan/PG-18861/2020	2020-11-16	Asia / Japan	Human		unknown	unknown	unknown	Original			B.1.1.214	GR	Illumina NextSeq500	SKESA v. 2.3.0
EPI_ISL_1127704	hCoV-19/Japan/PG-18862/2020	2020-11-16	Asia / Japan	Human		unknown	unknown	unknown	Original			B.1.1.284	GR	Illumina NextSeq500	SKESA v. 2.3.0
EPI_ISL_1127705	hCoV-19/Japan/PG-18863/2020	2020-11-16	Asia / Japan	Human		unknown	unknown	unknown	Original			B.1.1.214	GR	Illumina NextSeq500	A5-miseq v. 20140604
EPI_ISL_1127706	hCoV-19/Japan/PG-18864/2020	2020-11-16	Asia / Japan	Human		unknown	unknown	unknown	Original			B.1.1.214	GR	Illumina NextSeq500	SKESA v. 2.3.0
EPI_ISL_1127707	hCoV-19/Japan/PG-18865/2020	2020-11-16	Asia / Japan	Human		unknown	unknown	unknown	Original			B.1.1.284	GR	Illumina NextSeq500	SKESA v. 2.3.0
EPI_ISL_1127708	hCoV-19/Japan/PG-18866/2020	2020-11-16	Asia / Japan	Human		unknown	unknown	unknown	Original			B.1.1.284	GR	Illumina NextSeq500	SKESA v. 2.3.0
EPI_ISL_1127709	hCoV-19/Japan/PG-18867/2020	2020-11-16	Asia / Japan	Human		unknown	unknown	unknown	Original			B.1.1.284	GR	Illumina NextSeq500	A5-miseq v. 20140604
EPI_ISL_1127710	hCoV-19/Japan/PG-18868/2020	2020-11-17	Asia / Japan	Human		unknown	unknown	unknown	Original			B.1.1.214	GR	Illumina NextSeq500	SKESA v. 2.3.0
EPI_ISL_1127711	hCoV-19/Japan/PG-18869/2020	2020-11-19	Asia / Japan	Human		unknown	unknown	unknown	Original			B.1.1.86	GR	Illumina NextSeq500	SKESA v. 2.3.0
EPI_ISL_1127712	hCoV-19/Japan/PG-18870/2020	2020-11-19	Asia / Japan	Human		unknown	unknown	unknown	Original			B.1.1.214	GR	Illumina NextSeq500	SKESA v. 2.3.0
EPI_ISL_1127713	hCoV-19/Japan/PG-18871/2020	2020-11-19	Asia / Japan	Human		unknown	unknown	unknown	Original			B.1.1.214	GR	Illumina NextSeq500	SKESA v. 2.3.0
EPI_ISL_1127714	hCoV-19/Japan/PG-18872/2020	2020-11-20	Asia / Japan	Human		unknown	unknown	unknown	Original			B.1.1.214	GR	Illumina NextSeq500	SKESA v. 2.3.0
EPI_ISL_1127715	hCoV-19/Japan/PG-18873/2020	2020-11-20	Asia / Japan	Human		unknown	unknown	unknown	Original			B.1.1.284	GR	Illumina NextSeq500	SKESA v. 2.3.0
EPI_ISL_1127716	hCoV-19/Japan/PG-18876/2020	2020-11-21	Asia / Japan	Human		unknown	unknown	unknown	Original			B.1.1.284	GR	Illumina NextSeq500	A5-miseq v. 20140604
EPI_ISL_1127717	hCoV-19/Japan/PG-18877/2020	2020-11-21	Asia / Japan	Human		unknown	unknown	unknown	Original			B.1.1.214	GR	Illumina NextSeq500	SKESA v. 2.3.0
EPI_ISL_1127718	hCoV-19/Japan/PG-18878/2020	2020-11-23	Asia / Japan	Human		unknown	unknown	unknown	Original			B.1.1.284	GR	Illumina NextSeq500	SKESA v. 2.3.0
EPI_ISL_1127719	hCoV-19/Japan/PG-18879/2020	2020-11-23	Asia / Japan	Human		unknown	unknown	unknown	Original			B.1.1.86	GR	Illumina NextSeq500	SKESA v. 2.3.0
EPI_ISL_1127720	hCoV-19/Japan/PG-18880/2020	2020-11-23	Asia / Japan	Human		unknown	unknown	unknown	Original			B.1.1.214	GR	Illumina NextSeq500	SKESA v. 2.3.0
EPI_ISL_1127721	hCoV-19/Japan/PG-18881/2020	2020-11-23	Asia / Japan	Human		unknown	unknown	unknown	Original			B.1.1.101	GR	Illumina NextSeq500	SKESA v. 2.3.0
EPI_ISL_1127722	hCoV-19/Japan/PG-18882/2020	2020-11-23	Asia / Japan	Human		unknown	unknown	unknown	Original			B.1.1.214	GR	Illumina NextSeq500	SKESA v. 2.3.0
EPI_ISL_1127723	hCoV-19/Japan/PG-18883/2020	2020-11-23	Asia / Japan	Human		unknown	unknown	unknown	Original			B.1.1.101	GR	Illumina NextSeq500	SKESA v. 2.3.0
EPI_ISL_1127724	hCoV-19/Japan/PG-18884/2020	2020-11-25	Asia / Japan	Human		unknown	unknown	unknown	Original			B.1.1.214	GR	Illumina NextSeq500	SKESA v. 2.3.0
EPI_ISL_1127725	hCoV-19/Japan/PG-18885/2020	2020-11-25	Asia / Japan	Human		unknown	unknown	unknown	Original			B.1.1.284	GR	Illumina NextSeq500	SKESA v. 2.3.0
EPI_ISL_1127726	hCoV-19/Japan/PG-18886/2020	2020-11-26	Asia / Japan	Human		unknown	unknown	unknown	Original			B.1.1.284	GR	Illumina NextSeq500	SKESA v. 2.3.0
EPI_ISL_1127727	hCoV-19/Japan/PG-18887/2020	2020-11-26	Asia / Japan	Human		unknown	unknown	unknown	Original			B.1.1.214	GR	Illumina NextSeq500	SKESA v. 2.3.0
EPI_ISL_1127728	hCoV-19/Japan/PG-18888/2020	2020-11-26	Asia / Japan	Human		unknown	unknown	unknown	Original			B.1.1.284	GR	Illumina NextSeq500	SKESA v. 2.3.0
EPI_ISL_1127729	hCoV-19/Japan/PG-18889/2020	2020-11-27	Asia / Japan	Human		unknown	unknown	unknown	Original			B.1.1.214	GR	Illumina NextSeq500	bwa v. 0.7.13-r1126, picard v. 2.10.10, GATK v. 3.8.0, VarScan v. 2.4.3, VCFtools v. 0.1.12b, SKESA v. 2.3.0, A5-miseq v. 20140604
EPI_ISL_1127730	hCoV-19/Japan/PG-18890/2020	2020-11-27	Asia / Japan	Human		unknown	unknown	unknown	Original			B.1.1.214	GR	Illumina NextSeq500	A5-miseq v. 20140604
EPI_ISL_1127731	hCoV-19/Japan/PG-18891/2020	2020-11-27	Asia / Japan	Human		unknown	unknown	unknown	Original			B.1.1.284	GR	Illumina NextSeq500	SKESA v. 2.3.0
EPI_ISL_1127732	hCoV-19/Japan/PG-18892/2020	2020-11-27	Asia / Japan	Human		unknown	unknown	unknown	Original			B.1.1.214	GR	Illumina NextSeq500	SKESA v. 2.3.0
EPI_ISL_1127733	hCoV-19/Japan/PG-18893/2020	2020-11-27	Asia / Japan	Human		unknown	unknown	unknown	Original			B.1.1.214	GR	Illumina NextSeq500	SKESA v. 2.3.0
EPI_ISL_1127734	hCoV-19/Japan/PG-18894/2020	2020-11-27	Asia / Japan	Human		unknown	unknown	unknown	Original			B.1.1.214	GR	Illumina NextSeq500	SKESA v. 2.3.0
EPI_ISL_1127735	hCoV-19/Japan/PG-18895/2020	2020-11-29	Asia / Japan	Human		unknown	unknown	unknown	Original			B.1.1.214	GR	Illumina NextSeq500	SKESA v. 2.3.0
EPI_ISL_1127736	hCoV-19/Japan/PG-18896/2020	2020-11-30	Asia / Japan	Human		unknown	unknown	unknown	Original			B.1.1.284	GR	Illumina NextSeq500	SKESA v. 2.3.0
EPI_ISL_1127737	hCoV-19/Japan/PG-18897/2020	2020-11-30	Asia / Japan	Human		unknown	unknown	unknown	Original			B.1.1.284	GR	Illumina NextSeq500	SKESA v. 2.3.0
EPI_ISL_1127738	hCoV-19/Japan/PG-18899/2020	2020-11-30	Asia / Japan	Human		unknown	unknown	unknown	Original			B.1.1.214	GR	Illumina NextSeq500	SKESA v. 2.3.0
EPI_ISL_1127947	hCoV-19/Japan/PG-19200/2020	2020-11-28	Asia / Japan	Human		unknown	unknown	unknown	Original			B.1.1.214	GR	Illumina NextSeq500	A5-miseq v. 20140604
EPI_ISL_1127948	hCoV-19/Japan/PG-19201/2020	2020-11-28	Asia / Japan	Human		unknown	unknown	unknown	Original			B.1.1.214	GR	Illumina NextSeq500	SKESA v. 2.3.0
EPI_ISL_1127949	hCoV-19/Japan/PG-19203/2020	2020-11-29	Asia / Japan	Human		unknown	unknown	unknown	Original			B.1.1.284	GR	Illumina NextSeq500	SKESA v. 2.3.0
EPI_ISL_1127950	hCoV-19/Japan/PG-19204/2020	2020-11-29	Asia / Japan	Human		unknown	unknown	unknown	Original			B.1.1.214	GR	Illumina NextSeq500	SKESA v. 2.3.0
EPI_ISL_1127951	hCoV-19/Japan/PG-19205/2020	2020-11-29	Asia / Japan	Human		unknown	unknown	unknown	Original			B.1.1.214	GR	Illumina NextSeq500	A5-miseq v. 20140604
EPI_ISL_1127952	hCoV-19/Japan/PG-19206/2020	2020-11-29	Asia / Japan	Human		unknown	unknown	unknown	Original			B.1.1.214	GR	Illumina NextSeq500	SKESA v. 2.3.0
EPI_ISL_1127953	hCoV-19/Japan/PG-19207/2020	2020-11-29	Asia / Japan	Human		unknown	unknown	unknown	Original			B.1.1.214	GR	Illumina NextSeq500	A5-miseq v. 20140604
EPI_ISL_1127999	hCoV-19/Japan/PG-19254/2020	2020-11-19	Asia / Japan	Human		unknown	unknown	unknown	Original			B.1.1.214	GR	Illumina NextSeq500	SKESA v. 2.3.0
EPI_ISL_1128176	hCoV-19/Japan/PG-17091/2020	2020-11-06	Asia / Japan	Human		unknown	unknown	unknown	Original			B.1.1.214	GR	Illumina NextSeq500	A5-miseq v. 20140604	Gap of 1 nucleotides when compared to the reference sequence.	info
EPI_ISL_1128273	hCoV-19/Japan/PG-16266/2020	2020-11-20	Asia / Japan	Human		unknown	unknown	unknown	Original			B.1.1.214	GR	Illumina NextSeq500	A5-miseq v. 20140604
EPI_ISL_1128274	hCoV-19/Japan/PG-16267/2020	2020-11-22	Asia / Japan	Human		unknown	unknown	unknown	Original			B.1.1.214	GR	Illumina NextSeq500	SKESA v. 2.3.0
EPI_ISL_1128275	hCoV-19/Japan/PG-16268/2020	2020-11-29	Asia / Japan	Human		unknown	unknown	unknown	Original			B.1.1.101	GR	Illumina NextSeq500	SKESA v. 2.3.0
EPI_ISL_1128276	hCoV-19/Japan/PG-16269/2020	2020-11-29	Asia / Japan	Human		unknown	unknown	unknown	Original			B.1.1.214	GR	Illumina NextSeq500	SKESA v. 2.3.0
EPI_ISL_1128277	hCoV-19/Japan/PG-16270/2020	2020-11-30	Asia / Japan	Human		unknown	unknown	unknown	Original			B.1.1.101	GR	Illumina NextSeq500	SKESA v. 2.3.0
EPI_ISL_1128278	hCoV-19/Japan/PG-16271/2020	2020-11-30	Asia / Japan	Human		unknown	unknown	unknown	Original			B.1.1.214	GR	Illumina NextSeq500	SKESA v. 2.3.0
EPI_ISL_1128279	hCoV-19/Japan/PG-16272/2020	2020-11-30	Asia / Japan	Human		unknown	unknown	unknown	Original			B.1.1.214	GR	Illumina NextSeq500	A5-miseq v. 20140604
EPI_ISL_1128280	hCoV-19/Japan/PG-16273/2020	2020-11-30	Asia / Japan	Human		unknown	unknown	unknown	Original			B.1.1.101	GR	Illumina NextSeq500	SKESA v. 2.3.0
EPI_ISL_1128281	hCoV-19/Japan/PG-16274/2020	2020-11-30	Asia / Japan	Human		unknown	unknown	unknown	Original			B.1.1.101	GR	Illumina NextSeq500	A5-miseq v. 20140604
EPI_ISL_1128599	hCoV-19/Japan/PG-16606/2020	2020-11-27	Asia / Japan	Human		unknown	unknown	unknown	Original			B.1.1.284	GR	Illumina NextSeq2000	SKESA v. 2.3.0
EPI_ISL_1128600	hCoV-19/Japan/PG-16607/2020	2020-11-28	Asia / Japan	Human		unknown	unknown	unknown	Original			B.1.1.214	GR	Illumina NextSeq2000	A5-miseq v. 20140604
EPI_ISL_1128601	hCoV-19/Japan/PG-16608/2020	2020-11-28	Asia / Japan	Human		unknown	unknown	unknown	Original			B.1.1.214	GR	Illumina NextSeq2000	SKESA v. 2.3.0
EPI_ISL_1128602	hCoV-19/Japan/PG-16609/2020	2020-11-30	Asia / Japan	Human		unknown	unknown	unknown	Original			B.1.1.214	GR	Illumina NextSeq2000	SKESA v. 2.3.0
EPI_ISL_1128761	hCoV-19/Japan/PG-16779/2020	2020-11-23	Asia / Japan	Human		unknown	unknown	unknown	Original			B.1.1.214	GR	Illumina NextSeq500	SKESA v. 2.3.0
EPI_ISL_1128762	hCoV-19/Japan/PG-16780/2020	2020-11-23	Asia / Japan	Human		unknown	unknown	unknown	Original			B.1.1.214	GR	Illumina NextSeq500	A5-miseq v. 20140604
EPI_ISL_1128763	hCoV-19/Japan/PG-16781/2020	2020-11-23	Asia / Japan	Human		unknown	unknown	unknown	Original			B.1.1.214	GR	Illumina NextSeq500	SKESA v. 2.3.0
EPI_ISL_1128764	hCoV-19/Japan/PG-16782/2020	2020-11-23	Asia / Japan	Human		unknown	unknown	unknown	Original			B.1.1.214	GR	Illumina NextSeq500	SKESA v. 2.3.0
EPI_ISL_1128765	hCoV-19/Japan/PG-16783/2020	2020-11-23	Asia / Japan	Human		unknown	unknown	unknown	Original			B.1.1.214	GR	Illumina NextSeq500	SKESA v. 2.3.0
EPI_ISL_1128766	hCoV-19/Japan/PG-16784/2020	2020-11-23	Asia / Japan	Human		unknown	unknown	unknown	Original			B.1.1.214	GR	Illumina NextSeq500	SKESA v. 2.3.0
EPI_ISL_1128767	hCoV-19/Japan/PG-16785/2020	2020-11-23	Asia / Japan	Human		unknown	unknown	unknown	Original			B.1.1.214	GR	Illumina NextSeq500	SKESA v. 2.3.0
EPI_ISL_1128768	hCoV-19/Japan/PG-16786/2020	2020-11-23	Asia / Japan	Human		unknown	unknown	unknown	Original			B.1.1.214	GR	Illumina NextSeq500	SKESA v. 2.3.0
EPI_ISL_1129034	hCoV-19/Japan/PG-16994/2020	2020-11-02	Asia / Japan	Human		unknown	unknown	unknown	Original			B.1.1.284	GR	Illumina NextSeq500	SKESA v. 2.3.0
EPI_ISL_1129035	hCoV-19/Japan/PG-16995/2020	2020-11-02	Asia / Japan	Human		unknown	unknown	unknown	Original			B.1.1.214	GR	Illumina NextSeq500	SKESA v. 2.3.0
EPI_ISL_1129036	hCoV-19/Japan/PG-16996/2020	2020-11-04	Asia / Japan	Human		unknown	unknown	unknown	Original			B.1.1.214	GR	Illumina NextSeq500	SKESA v. 2.3.0
EPI_ISL_1129037	hCoV-19/Japan/PG-16997/2020	2020-11-04	Asia / Japan	Human		unknown	unknown	unknown	Original			B.1.1.284	GR	Illumina NextSeq500	A5-miseq v. 20140604
EPI_ISL_1129038	hCoV-19/Japan/PG-16998/2020	2020-11-05	Asia / Japan	Human		unknown	unknown	unknown	Original			B.1.1.214	GR	Illumina NextSeq500	SKESA v. 2.3.0
EPI_ISL_1129039	hCoV-19/Japan/PG-16999/2020	2020-11-06	Asia / Japan	Human		unknown	unknown	unknown	Original			B.1.1.284	GR	Illumina NextSeq500	SKESA v. 2.3.0
EPI_ISL_1129040	hCoV-19/Japan/PG-17000/2020	2020-11-06	Asia / Japan	Human		unknown	unknown	unknown	Original			B.1.1.214	GR	Illumina NextSeq500	SKESA v. 2.3.0
EPI_ISL_1129041	hCoV-19/Japan/PG-17001/2020	2020-11-11	Asia / Japan	Human		unknown	unknown	unknown	Original			B.1.1.86	GR	Illumina NextSeq500	SKESA v. 2.3.0
EPI_ISL_1129042	hCoV-19/Japan/PG-17002/2020	2020-11-12	Asia / Japan	Human		unknown	unknown	unknown	Original			B.1.1.214	GR	Illumina NextSeq500	SKESA v. 2.3.0
EPI_ISL_1129043	hCoV-19/Japan/PG-17003/2020	2020-11-12	Asia / Japan	Human		unknown	unknown	unknown	Original			B.1.1.284	GR	Illumina NextSeq500	A5-miseq v. 20140604
EPI_ISL_1129044	hCoV-19/Japan/PG-17004/2020	2020-11-12	Asia / Japan	Human		unknown	unknown	unknown	Original			B.1.1.214	GR	Illumina NextSeq500	SKESA v. 2.3.0
EPI_ISL_1129045	hCoV-19/Japan/PG-17005/2020	2020-11-17	Asia / Japan	Human		unknown	unknown	unknown	Original			B.1.1.214	GR	Illumina NextSeq500	SKESA v. 2.3.0
EPI_ISL_1129046	hCoV-19/Japan/PG-17006/2020	2020-11-20	Asia / Japan	Human		unknown	unknown	unknown	Original			B.1.1.214	GR	Illumina NextSeq500	SKESA v. 2.3.0
EPI_ISL_1129047	hCoV-19/Japan/PG-17007/2020	2020-11-21	Asia / Japan	Human		unknown	unknown	unknown	Original			B.1.1.214	GR	Illumina NextSeq500	SKESA v. 2.3.0
EPI_ISL_1129048	hCoV-19/Japan/PG-17008/2020	2020-11-22	Asia / Japan	Human		unknown	unknown	unknown	Original			B.1.1.214	GR	Illumina NextSeq500	SKESA v. 2.3.0
EPI_ISL_1129049	hCoV-19/Japan/PG-17009/2020	2020-11-25	Asia / Japan	Human		unknown	unknown	unknown	Original			B.1.1.284	GR	Illumina NextSeq500	SKESA v. 2.3.0
EPI_ISL_1129050	hCoV-19/Japan/PG-17010/2020	2020-11-27	Asia / Japan	Human		unknown	unknown	unknown	Original			B.1.1.214	GR	Illumina NextSeq500	A5-miseq v. 20140604
EPI_ISL_1129051	hCoV-19/Japan/PG-17011/2020	2020-11-27	Asia / Japan	Human		unknown	unknown	unknown	Original			B.1.1.214	GR	Illumina NextSeq500	SKESA v. 2.3.0
EPI_ISL_1129052	hCoV-19/Japan/PG-17012/2020	2020-11-27	Asia / Japan	Human		unknown	unknown	unknown	Original			B.1.1.214	GR	Illumina NextSeq500	SKESA v. 2.3.0
EPI_ISL_1129053	hCoV-19/Japan/PG-17013/2020	2020-11-27	Asia / Japan	Human		unknown	unknown	unknown	Original			B.1.1.214	GR	Illumina NextSeq500	A5-miseq v. 20140604
EPI_ISL_1129054	hCoV-19/Japan/PG-17014/2020	2020-11-29	Asia / Japan	Human		unknown	unknown	unknown	Original			B.1.1.214	GR	Illumina NextSeq500	SKESA v. 2.3.0
EPI_ISL_1129055	hCoV-19/Japan/PG-17015/2020	2020-11-29	Asia / Japan	Human		unknown	unknown	unknown	Original			B.1.1.214	GR	Illumina NextSeq500	SKESA v. 2.3.0
EPI_ISL_1129056	hCoV-19/Japan/PG-17016/2020	2020-11-30	Asia / Japan	Human		unknown	unknown	unknown	Original			B.1.1.15	GR	Illumina NextSeq500	SKESA v. 2.3.0
EPI_ISL_1129057	hCoV-19/Japan/PG-17017/2020	2020-11-30	Asia / Japan	Human		unknown	unknown	unknown	Original			B.1.1.317	GR	Illumina NextSeq500	SKESA v. 2.3.0
EPI_ISL_1129073	hCoV-19/Japan/PG-17034/2020	2020-11-01	Asia / Japan	Human		unknown	unknown	unknown	Original			B.1.1.214	GR	Illumina NextSeq500	A5-miseq v. 20140604
EPI_ISL_1129074	hCoV-19/Japan/PG-17035/2020	2020-11-04	Asia / Japan	Human		unknown	unknown	unknown	Original			B.1.1.214	GR	Illumina NextSeq500	SKESA v. 2.3.0
EPI_ISL_1129075	hCoV-19/Japan/PG-17036/2020	2020-11-05	Asia / Japan	Human		unknown	unknown	unknown	Original			B.1.1.214	GR	Illumina NextSeq500	SKESA v. 2.3.0
EPI_ISL_1129076	hCoV-19/Japan/PG-17037/2020	2020-11-06	Asia / Japan	Human		unknown	unknown	unknown	Original			B.1.1.214	GR	Illumina NextSeq500	A5-miseq v. 20140604
EPI_ISL_1129077	hCoV-19/Japan/PG-17038/2020	2020-11-06	Asia / Japan	Human		unknown	unknown	unknown	Original			B.1.1.214	GR	Illumina NextSeq500	SKESA v. 2.3.0
EPI_ISL_1129078	hCoV-19/Japan/PG-17039/2020	2020-11-10	Asia / Japan	Human		unknown	unknown	unknown	Original			B.1.1.214	GR	Illumina NextSeq500	SKESA v. 2.3.0
EPI_ISL_1129079	hCoV-19/Japan/PG-17040/2020	2020-11-12	Asia / Japan	Human		unknown	unknown	unknown	Original			B.1.1.214	GR	Illumina NextSeq500	A5-miseq v. 20140604
EPI_ISL_1129080	hCoV-19/Japan/PG-17041/2020	2020-11-14	Asia / Japan	Human		unknown	unknown	unknown	Original			B.1.1.214	GR	Illumina NextSeq500	SKESA v. 2.3.0
EPI_ISL_1129081	hCoV-19/Japan/PG-17042/2020	2020-11-17	Asia / Japan	Human		unknown	unknown	unknown	Original			B.1.1.214	GR	Illumina NextSeq500	SKESA v. 2.3.0
EPI_ISL_1129082	hCoV-19/Japan/PG-17043/2020	2020-11-18	Asia / Japan	Human		unknown	unknown	unknown	Original			B.1.1.214	GR	Illumina NextSeq500	SKESA v. 2.3.0
EPI_ISL_1129083	hCoV-19/Japan/PG-17045/2020	2020-11-19	Asia / Japan	Human		unknown	unknown	unknown	Original			B.1.1.214	GR	Illumina NextSeq500	SKESA v. 2.3.0
EPI_ISL_1129084	hCoV-19/Japan/PG-17046/2020	2020-11-19	Asia / Japan	Human		unknown	unknown	unknown	Original			B.1.1.214	GR	Illumina NextSeq500	SKESA v. 2.3.0
EPI_ISL_1129085	hCoV-19/Japan/PG-17047/2020	2020-11-21	Asia / Japan	Human		unknown	unknown	unknown	Original			B.1.1.214	GR	Illumina NextSeq500	SKESA v. 2.3.0
EPI_ISL_1129086	hCoV-19/Japan/PG-17048/2020	2020-11-22	Asia / Japan	Human		unknown	unknown	unknown	Original			B.1.1.214	GR	Illumina NextSeq500	A5-miseq v. 20140604
EPI_ISL_1129087	hCoV-19/Japan/PG-17049/2020	2020-11-26	Asia / Japan	Human		unknown	unknown	unknown	Original			B.1.1.284	GR	Illumina NextSeq500	SKESA v. 2.3.0
EPI_ISL_1129088	hCoV-19/Japan/PG-17050/2020	2020-11-27	Asia / Japan	Human		unknown	unknown	unknown	Original			B.1.1.284	GR	Illumina NextSeq500	SKESA v. 2.3.0
EPI_ISL_1129094	hCoV-19/Japan/PG-17056/2020	2020-11-06	Asia / Japan	Human		unknown	unknown	unknown	Original			B.1.1.214	GR	Illumina NextSeq500	A5-miseq v. 20140604
EPI_ISL_1129095	hCoV-19/Japan/PG-17057/2020	2020-11-09	Asia / Japan	Human		unknown	unknown	unknown	Original			B.1.1.214	GR	Illumina NextSeq500	SKESA v. 2.3.0
EPI_ISL_1129096	hCoV-19/Japan/PG-17058/2020	2020-11-11	Asia / Japan	Human		unknown	unknown	unknown	Original			B.1.1.214	GR	Illumina NextSeq500	A5-miseq v. 20140604
EPI_ISL_1129097	hCoV-19/Japan/PG-17059/2020	2020-11-15	Asia / Japan	Human		unknown	unknown	unknown	Original			B.1.1.214	GR	Illumina NextSeq500	SKESA v. 2.3.0
EPI_ISL_1129098	hCoV-19/Japan/PG-17060/2020	2020-11-22	Asia / Japan	Human		unknown	unknown	unknown	Original			B.1.1.214	GR	Illumina NextSeq500	A5-miseq v. 20140604
EPI_ISL_1129099	hCoV-19/Japan/PG-17061/2020	2020-11-24	Asia / Japan	Human		unknown	unknown	unknown	Original			B.1.1.214	GR	Illumina NextSeq500	SKESA v. 2.3.0
EPI_ISL_1129104	hCoV-19/Japan/PG-17066/2020	2020-11-18	Asia / Japan	Human		unknown	unknown	unknown	Original			B.1.1.214	GR	Illumina NextSeq500	A5-miseq v. 20140604
EPI_ISL_1129105	hCoV-19/Japan/PG-17067/2020	2020-11-18	Asia / Japan	Human		unknown	unknown	unknown	Original			B.1.1.49	GR	Illumina NextSeq500	A5-miseq v. 20140604
EPI_ISL_1129106	hCoV-19/Japan/PG-17068/2020	2020-11-19	Asia / Japan	Human		unknown	unknown	unknown	Original			B.1.1.214	GR	Illumina NextSeq500	A5-miseq v. 20140604
EPI_ISL_1129107	hCoV-19/Japan/PG-17069/2020	2020-11-22	Asia / Japan	Human		unknown	unknown	unknown	Original			B.1.1.214	GR	Illumina NextSeq500	SKESA v. 2.3.0
EPI_ISL_1129108	hCoV-19/Japan/PG-17070/2020	2020-11-24	Asia / Japan	Human		unknown	unknown	unknown	Original			B.1.1.214	GR	Illumina NextSeq500	SKESA v. 2.3.0
EPI_ISL_1129109	hCoV-19/Japan/PG-17071/2020	2020-11-25	Asia / Japan	Human		unknown	unknown	unknown	Original			B.1.1.214	GR	Illumina NextSeq500	SKESA v. 2.3.0
EPI_ISL_1129127	hCoV-19/Japan/PG-17089/2020	2020-11-04	Asia / Japan	Human		unknown	unknown	unknown	Original			B.1.1.214	GR	Illumina NextSeq500	A5-miseq v. 20140604
EPI_ISL_1129128	hCoV-19/Japan/PG-17090/2020	2020-11-05	Asia / Japan	Human		unknown	unknown	unknown	Original			B.1.1.214	GR	Illumina NextSeq500	SKESA v. 2.3.0
EPI_ISL_1129129	hCoV-19/Japan/PG-17092/2020	2020-11-11	Asia / Japan	Human		unknown	unknown	unknown	Original			B.1.1.214	GR	Illumina NextSeq500	SKESA v. 2.3.0
EPI_ISL_1129151	hCoV-19/Japan/PG-17190/2020	2020-11-12	Asia / Japan	Human		unknown	unknown	unknown	Original			B.1.1.214	GR	Illumina NextSeq500	SKESA v. 2.3.0
EPI_ISL_1129152	hCoV-19/Japan/PG-17191/2020	2020-11-12	Asia / Japan	Human		unknown	unknown	unknown	Original			B.1.1.214	GR	Illumina NextSeq500	SKESA v. 2.3.0
EPI_ISL_1129153	hCoV-19/Japan/PG-17192/2020	2020-11-16	Asia / Japan	Human		unknown	unknown	unknown	Original			B.1.1.284	GR	Illumina NextSeq500	SKESA v. 2.3.0
EPI_ISL_1129154	hCoV-19/Japan/PG-17193/2020	2020-11-17	Asia / Japan	Human		unknown	unknown	unknown	Original			B.1.1.214	GR	Illumina NextSeq500	SKESA v. 2.3.0
EPI_ISL_1129155	hCoV-19/Japan/PG-17194/2020	2020-11-18	Asia / Japan	Human		unknown	unknown	unknown	Original			B.1.1.214	GR	Illumina NextSeq500	SKESA v. 2.3.0
EPI_ISL_1129156	hCoV-19/Japan/PG-17195/2020	2020-11-21	Asia / Japan	Human		unknown	unknown	unknown	Original			B.1.1.214	GR	Illumina NextSeq500	SKESA v. 2.3.0
EPI_ISL_1129157	hCoV-19/Japan/PG-17196/2020	2020-11-22	Asia / Japan	Human		unknown	unknown	unknown	Original			B.1.1.214	GR	Illumina NextSeq500	SKESA v. 2.3.0
EPI_ISL_1129158	hCoV-19/Japan/PG-17197/2020	2020-11-22	Asia / Japan	Human		unknown	unknown	unknown	Original			B.1.1.214	GR	Illumina NextSeq500	SKESA v. 2.3.0
EPI_ISL_1129159	hCoV-19/Japan/PG-17198/2020	2020-11-24	Asia / Japan	Human		unknown	unknown	unknown	Original			B.1.1.317	GR	Illumina NextSeq500	SKESA v. 2.3.0
EPI_ISL_1129160	hCoV-19/Japan/PG-17199/2020	2020-11-25	Asia / Japan	Human		unknown	unknown	unknown	Original			B.1.1.214	GR	Illumina NextSeq500	SKESA v. 2.3.0
EPI_ISL_1129161	hCoV-19/Japan/PG-17200/2020	2020-11-25	Asia / Japan	Human		unknown	unknown	unknown	Original			B.1.1.214	GR	Illumina NextSeq500	SKESA v. 2.3.0
EPI_ISL_1129162	hCoV-19/Japan/PG-17201/2020	2020-11-25	Asia / Japan	Human		unknown	unknown	unknown	Original			B.1.1.214	GR	Illumina NextSeq500	SKESA v. 2.3.0
EPI_ISL_1129163	hCoV-19/Japan/PG-17202/2020	2020-11-30	Asia / Japan	Human		unknown	unknown	unknown	Original			B.1.1.214	GR	Illumina NextSeq500	SKESA v. 2.3.0
EPI_ISL_1129164	hCoV-19/Japan/PG-17203/2020	2020-11-30	Asia / Japan	Human		unknown	unknown	unknown	Original			B.1.1.214	GR	Illumina NextSeq500	SKESA v. 2.3.0
EPI_ISL_1129177	hCoV-19/Japan/PG-17216/2020	2020-11-03	Asia / Japan	Human		unknown	unknown	unknown	Original			B.1.1.214	GR	Illumina NextSeq500	SKESA v. 2.3.0
EPI_ISL_1129178	hCoV-19/Japan/PG-17217/2020	2020-11-12	Asia / Japan	Human		unknown	unknown	unknown	Original			B.1.1.214	GR	Illumina NextSeq500	SKESA v. 2.3.0
EPI_ISL_1129179	hCoV-19/Japan/PG-17218/2020	2020-11-14	Asia / Japan	Human		unknown	unknown	unknown	Original			B.1.1.220	GR	Illumina NextSeq500	SKESA v. 2.3.0
EPI_ISL_1129180	hCoV-19/Japan/PG-17219/2020	2020-11-16	Asia / Japan	Human		unknown	unknown	unknown	Original			B.1.1.214	GR	Illumina NextSeq500	A5-miseq v. 20140604
EPI_ISL_1129181	hCoV-19/Japan/PG-17220/2020	2020-11-18	Asia / Japan	Human		unknown	unknown	unknown	Original			B.1.1.214	GR	Illumina NextSeq500	SKESA v. 2.3.0
EPI_ISL_1129182	hCoV-19/Japan/PG-17221/2020	2020-11-18	Asia / Japan	Human		unknown	unknown	unknown	Original			B.1.1.214	GR	Illumina NextSeq500	SKESA v. 2.3.0
EPI_ISL_1129183	hCoV-19/Japan/PG-17222/2020	2020-11-19	Asia / Japan	Human		unknown	unknown	unknown	Original			B.1.1.214	GR	Illumina NextSeq500	SKESA v. 2.3.0
EPI_ISL_1129184	hCoV-19/Japan/PG-17223/2020	2020-11-20	Asia / Japan	Human		unknown	unknown	unknown	Original			B.1.1.214	GR	Illumina NextSeq500	A5-miseq v. 20140604
EPI_ISL_1129185	hCoV-19/Japan/PG-17224/2020	2020-11-24	Asia / Japan	Human		unknown	unknown	unknown	Original			B.1.1.284	GR	Illumina NextSeq500	SKESA v. 2.3.0
EPI_ISL_1129198	hCoV-19/Japan/PG-17237/2020	2020-11-01	Asia / Japan	Human		unknown	unknown	unknown	Original			B.1.1.214	GR	Illumina NextSeq500	A5-miseq v. 20140604
EPI_ISL_1129199	hCoV-19/Japan/PG-17238/2020	2020-11-05	Asia / Japan	Human		unknown	unknown	unknown	Original			B.1.1.214	GR	Illumina NextSeq500	SKESA v. 2.3.0
EPI_ISL_1129200	hCoV-19/Japan/PG-17239/2020	2020-11-08	Asia / Japan	Human		unknown	unknown	unknown	Original			B.1.1.284	GR	Illumina NextSeq500	SKESA v. 2.3.0
EPI_ISL_1129201	hCoV-19/Japan/PG-17240/2020	2020-11-13	Asia / Japan	Human		unknown	unknown	unknown	Original			B.1.1.284	GR	Illumina NextSeq500	SKESA v. 2.3.0
EPI_ISL_1129202	hCoV-19/Japan/PG-17241/2020	2020-11-12	Asia / Japan	Human		unknown	unknown	unknown	Original			B.1.1.214	GR	Illumina NextSeq500	SKESA v. 2.3.0
EPI_ISL_1129203	hCoV-19/Japan/PG-17242/2020	2020-11-15	Asia / Japan	Human		unknown	unknown	unknown	Original			B.1.1.214	GR	Illumina NextSeq500	SKESA v. 2.3.0
EPI_ISL_1129212	hCoV-19/Japan/PG-17251/2020	2020-11-05	Asia / Japan	Human		unknown	unknown	unknown	Original			B.1.1.214	GR	Illumina NextSeq500	SKESA v. 2.3.0
EPI_ISL_1129213	hCoV-19/Japan/PG-17252/2020	2020-11-06	Asia / Japan	Human		unknown	unknown	unknown	Original			B.1.1.214	GR	Illumina NextSeq500	SKESA v. 2.3.0
EPI_ISL_1129214	hCoV-19/Japan/PG-17253/2020	2020-11-25	Asia / Japan	Human		unknown	unknown	unknown	Original			B.1.1.214	GR	Illumina NextSeq500	SKESA v. 2.3.0
EPI_ISL_1129310	hCoV-19/Switzerland/AG-ETHZ-380377/2020	2020-11-22	Europe / Switzerland / Aargau	Human		unknown	unknown	unknown	Original	Oropharyngeal or Nasopharyngeal swab		B.1.177	GV	Illumina	V-pipe	Gap of 1 nucleotide(s) found at refpos 4723 (frameshift confirmed by the submitter). Gap of 1 nucleotide(s) found at refpos 18562 (frameshift confirmed by the submitter). Gap of 2 nucleotides when compared to the reference sequence. NSP14 without BLAST coverage.	info
EPI_ISL_1129587	hCoV-19/Switzerland/BE-ETHZ-410243/2020	2020-11-27	Europe / Switzerland / Bern	Human		unknown	unknown	unknown	Original	Oropharyngeal or Nasopharyngeal swab		B.1.177	GV	Illumina	V-pipe
EPI_ISL_1129936	hCoV-19/Switzerland/BL-ETHZ-380271/2020	2020-11-22	Europe / Switzerland / Basel-Landschaft	Human		unknown	unknown	unknown	Original	Oropharyngeal or Nasopharyngeal swab		B.1.160	GH	Illumina	V-pipe	Gap of 8 nucleotide(s) found at refpos 26160 (frameshift confirmed by the submitter).	info
EPI_ISL_1129938	hCoV-19/Switzerland/BL-ETHZ-380274/2020	2020-11-22	Europe / Switzerland / Basel-Landschaft	Human		unknown	unknown	unknown	Original	Oropharyngeal or Nasopharyngeal swab		B.1.160	GH	Illumina	V-pipe	Gap of 1 nucleotide(s) found at refpos 28254 (frameshift confirmed by the submitter).	info
EPI_ISL_1130045	hCoV-19/Switzerland/BS-ETHZ-380335/2020	2020-11-26	Europe / Switzerland / Basel-Stadt	Human		unknown	unknown	unknown	Original	Oropharyngeal or Nasopharyngeal swab		B.1.36	GH	Illumina	V-pipe	Gap of 28 nucleotide(s) found at refpos 24176 (frameshift confirmed by the submitter). Gap of 1 nucleotide(s) found at refpos 26161 (frameshift confirmed by the submitter). Gap of 29 nucleotides when compared to the reference sequence. NS3 without BLAST coverage.	info
EPI_ISL_1130111	hCoV-19/Switzerland/GR-ETHZ-380314/2020	2020-11-24	Europe / Switzerland / GraubÃ¼nden	Human		unknown	unknown	unknown	Original	Oropharyngeal or Nasopharyngeal swab		B.1.160	GH	Illumina	V-pipe	Gap of 2 nucleotide(s) found at refpos 26159 (frameshift confirmed by the submitter). NS3 without BLAST coverage.	info
EPI_ISL_1130203	hCoV-19/Switzerland/SG-ETHZ-380397/2020	2020-11-23	Europe / Switzerland / St Gallen	Human		unknown	unknown	unknown	Original	Oropharyngeal or Nasopharyngeal swab		B.1.160	G	Illumina	V-pipe
EPI_ISL_1130220	hCoV-19/Switzerland/SH-ETHZ-410537/2020	2020-11-26	Europe / Switzerland / Schaffhausen	Human		unknown	unknown	unknown	Original	Oropharyngeal or Nasopharyngeal swab		B.1	G	Illumina	V-pipe
EPI_ISL_1130724	hCoV-19/Switzerland/VS-ETHZ-380201/2020	2020-11-23	Europe / Switzerland / Valais	Human		unknown	unknown	unknown	Original	Oropharyngeal or Nasopharyngeal swab		B.1.160	GH	Illumina	V-pipe	Gap of 1 nucleotide(s) found at refpos 27313 (frameshift confirmed by the submitter). NS6 without BLAST coverage.	info
EPI_ISL_1130791	hCoV-19/Switzerland/ZH-ETHZ-360301/2020	2020-11-06	Europe / Switzerland / Zurich	Human		unknown	unknown	unknown	Original	Oropharyngeal or Nasopharyngeal swab		B.1.160	GH	Illumina	V-pipe	Gap of 13 nucleotide(s) found at refpos 27672 (frameshift confirmed by the submitter). Gap of 16 nucleotides when compared to the reference sequence. NS7a without BLAST coverage.	info
EPI_ISL_1130804	hCoV-19/Switzerland/ZH-ETHZ-410912/2020	2020-11-30	Europe / Switzerland / Zurich	Human		unknown	unknown	unknown	Original	Oropharyngeal or Nasopharyngeal swab		B.1.160	GH	Illumina	V-pipe
EPI_ISL_1131003	hCoV-19/Switzerland/ZH-ETHZ-410249/2020	2020-11-27	Europe / Switzerland / Zurich	Human		unknown	unknown	unknown	Original	Oropharyngeal or Nasopharyngeal swab		B.1.1.39	GR	Illumina	V-pipe
EPI_ISL_1131145	hCoV-19/Japan/PG-17261/2020	2020-11-17	Asia / Japan	Human		unknown	unknown	unknown	Original			B.1.1.214	GR	Illumina NextSeq500	SKESA v. 2.3.0	Gap of 9 nucleotides when compared to the reference sequence.	info
EPI_ISL_1131155	hCoV-19/Japan/PG-17809/2020	2020-11-16	Asia / Japan	Human		unknown	unknown	unknown	Original			B.1.1.284	GR	Illumina NextSeq2000	SKESA v. 2.3.0	Gap of 19 nucleotides when compared to the reference sequence.	info
EPI_ISL_1131156	hCoV-19/Japan/PG-17256/2020	2020-11-03	Asia / Japan	Human		unknown	unknown	unknown	Original			B.1.1.214	GR	Illumina NextSeq500	A5-miseq v. 20140604	Gap of 15 nucleotides when compared to the reference sequence.	info
EPI_ISL_1131159	hCoV-19/Japan/PG-17279/2020	2020-11-17	Asia / Japan	Human		unknown	unknown	unknown	Original			B.1.1.214	GR	Illumina NextSeq500	SKESA v. 2.3.0	Gap of 12 nucleotides when compared to the reference sequence.	info
EPI_ISL_1131160	hCoV-19/Japan/PG-17801/2020	2020-11-14	Asia / Japan	Human		unknown	unknown	unknown	Original			B.1.1.284	GR	Illumina NextSeq2000	SKESA v. 2.3.0	Gap of 10 nucleotide(s) found at refpos 27581 (frameshift confirmed by the submitter). NS7a without BLAST coverage.	info
EPI_ISL_1131178	hCoV-19/Japan/PG-17254/2020	2020-11-25	Asia / Japan	Human		unknown	unknown	unknown	Original			B.1.1.214	GR	Illumina NextSeq500	SKESA v. 2.3.0
EPI_ISL_1131179	hCoV-19/Japan/PG-17255/2020	2020-11-25	Asia / Japan	Human		unknown	unknown	unknown	Original			B.1.1.214	GR	Illumina NextSeq500	SKESA v. 2.3.0
EPI_ISL_1131180	hCoV-19/Japan/PG-17257/2020	2020-11-07	Asia / Japan	Human		unknown	unknown	unknown	Original			B.1.1.214	GR	Illumina NextSeq500	SKESA v. 2.3.0
EPI_ISL_1131181	hCoV-19/Japan/PG-17258/2020	2020-11-12	Asia / Japan	Human		unknown	unknown	unknown	Original			B.1.1.214	GR	Illumina NextSeq500	SKESA v. 2.3.0
EPI_ISL_1131182	hCoV-19/Japan/PG-17259/2020	2020-11-15	Asia / Japan	Human		unknown	unknown	unknown	Original			B.1.1.214	GR	Illumina NextSeq500	SKESA v. 2.3.0
EPI_ISL_1131183	hCoV-19/Japan/PG-17260/2020	2020-11-15	Asia / Japan	Human		unknown	unknown	unknown	Original			B.1.1.214	GR	Illumina NextSeq500	SKESA v. 2.3.0
EPI_ISL_1131184	hCoV-19/Japan/PG-17262/2020	2020-11-27	Asia / Japan	Human		unknown	unknown	unknown	Original			B.1.1.214	GR	Illumina NextSeq500	SKESA v. 2.3.0
EPI_ISL_1131185	hCoV-19/Japan/PG-17263/2020	2020-11-30	Asia / Japan	Human		unknown	unknown	unknown	Original			B.1.1.214	GR	Illumina NextSeq500	SKESA v. 2.3.0
EPI_ISL_1131190	hCoV-19/Japan/PG-17268/2020	2020-11-06	Asia / Japan	Human		unknown	unknown	unknown	Original			B.1.1.214	GR	Illumina NextSeq500	SKESA v. 2.3.0
EPI_ISL_1131191	hCoV-19/Japan/PG-17269/2020	2020-11-06	Asia / Japan	Human		unknown	unknown	unknown	Original			B.1.1.214	GR	Illumina NextSeq500	SKESA v. 2.3.0
EPI_ISL_1131192	hCoV-19/Japan/PG-17270/2020	2020-11-08	Asia / Japan	Human		unknown	unknown	unknown	Original			B.1.1.214	GR	Illumina NextSeq500	SKESA v. 2.3.0
EPI_ISL_1131193	hCoV-19/Japan/PG-17271/2020	2020-11-08	Asia / Japan	Human		unknown	unknown	unknown	Original			B.1.1.214	GR	Illumina NextSeq500	SKESA v. 2.3.0
EPI_ISL_1131194	hCoV-19/Japan/PG-17272/2020	2020-11-13	Asia / Japan	Human		unknown	unknown	unknown	Original			B.1.1.214	GR	Illumina NextSeq500	SKESA v. 2.3.0
EPI_ISL_1131195	hCoV-19/Japan/PG-17273/2020	2020-11-13	Asia / Japan	Human		unknown	unknown	unknown	Original			B.1.1.214	GR	Illumina NextSeq500	SKESA v. 2.3.0
EPI_ISL_1131196	hCoV-19/Japan/PG-17274/2020	2020-11-15	Asia / Japan	Human		unknown	unknown	unknown	Original			B.1.1.214	GR	Illumina NextSeq500	SKESA v. 2.3.0
EPI_ISL_1131197	hCoV-19/Japan/PG-17275/2020	2020-11-15	Asia / Japan	Human		unknown	unknown	unknown	Original			B.1.1.214	GR	Illumina NextSeq500	SKESA v. 2.3.0
EPI_ISL_1131198	hCoV-19/Japan/PG-17276/2020	2020-11-15	Asia / Japan	Human		unknown	unknown	unknown	Original			B.1.1.214	GR	Illumina NextSeq500	SKESA v. 2.3.0
EPI_ISL_1131199	hCoV-19/Japan/PG-17277/2020	2020-11-16	Asia / Japan	Human		unknown	unknown	unknown	Original			B.1.1.214	GR	Illumina NextSeq500	A5-miseq v. 20140604
EPI_ISL_1131200	hCoV-19/Japan/PG-17278/2020	2020-11-16	Asia / Japan	Human		unknown	unknown	unknown	Original			B.1.1.214	GR	Illumina NextSeq500	SKESA v. 2.3.0
EPI_ISL_1131201	hCoV-19/Japan/PG-17280/2020	2020-11-20	Asia / Japan	Human		unknown	unknown	unknown	Original			B.1.1.214	GR	Illumina NextSeq500	SKESA v. 2.3.0
EPI_ISL_1131202	hCoV-19/Japan/PG-17281/2020	2020-11-22	Asia / Japan	Human		unknown	unknown	unknown	Original			B.1.1.214	GR	Illumina NextSeq500	A5-miseq v. 20140604
EPI_ISL_1131203	hCoV-19/Japan/PG-17282/2020	2020-11-22	Asia / Japan	Human		unknown	unknown	unknown	Original			B.1.1.214	GR	Illumina NextSeq500	SKESA v. 2.3.0
EPI_ISL_1131204	hCoV-19/Japan/PG-17283/2020	2020-11-24	Asia / Japan	Human		unknown	unknown	unknown	Original			B.1.1.214	GR	Illumina NextSeq500	SKESA v. 2.3.0
EPI_ISL_1131205	hCoV-19/Japan/PG-17284/2020	2020-11-23	Asia / Japan	Human		unknown	unknown	unknown	Original			B.1.1.214	GR	Illumina NextSeq500	SKESA v. 2.3.0
EPI_ISL_1131206	hCoV-19/Japan/PG-17285/2020	2020-11-23	Asia / Japan	Human		unknown	unknown	unknown	Original			B.1.1.214	GR	Illumina NextSeq500	SKESA v. 2.3.0
EPI_ISL_1131207	hCoV-19/Japan/PG-17286/2020	2020-11-23	Asia / Japan	Human		unknown	unknown	unknown	Original			B.1.1.214	GR	Illumina NextSeq500	SKESA v. 2.3.0
EPI_ISL_1131208	hCoV-19/Japan/PG-17287/2020	2020-11-24	Asia / Japan	Human		unknown	unknown	unknown	Original			B.1.1.214	GR	Illumina NextSeq500	SKESA v. 2.3.0
EPI_ISL_1131209	hCoV-19/Japan/PG-17288/2020	2020-11-25	Asia / Japan	Human		unknown	unknown	unknown	Original			B.1.1.214	GR	Illumina NextSeq500	SKESA v. 2.3.0
EPI_ISL_1131210	hCoV-19/Japan/PG-17289/2020	2020-11-25	Asia / Japan	Human		unknown	unknown	unknown	Original			B.1.1.214	GR	Illumina NextSeq500	SKESA v. 2.3.0
EPI_ISL_1131211	hCoV-19/Japan/PG-17290/2020	2020-11-25	Asia / Japan	Human		unknown	unknown	unknown	Original			B.1.1.214	GR	Illumina NextSeq500	SKESA v. 2.3.0
EPI_ISL_1131212	hCoV-19/Japan/PG-17291/2020	2020-11-25	Asia / Japan	Human		unknown	unknown	unknown	Original			B.1.1.214	GR	Illumina NextSeq500	SKESA v. 2.3.0
EPI_ISL_1131213	hCoV-19/Japan/PG-17292/2020	2020-11-25	Asia / Japan	Human		unknown	unknown	unknown	Original			B.1.1.214	GR	Illumina NextSeq500	SKESA v. 2.3.0
EPI_ISL_1131214	hCoV-19/Japan/PG-17293/2020	2020-11-26	Asia / Japan	Human		unknown	unknown	unknown	Original			B.1.1.214	GR	Illumina NextSeq500	SKESA v. 2.3.0
EPI_ISL_1131215	hCoV-19/Japan/PG-17294/2020	2020-11-30	Asia / Japan	Human		unknown	unknown	unknown	Original			B.1.1.214	GR	Illumina NextSeq500	A5-miseq v. 20140604
EPI_ISL_1131225	hCoV-19/Japan/PG-17304/2020	2020-11-19	Asia / Japan	Human		unknown	unknown	unknown	Original			B.1.1.284	GR	Illumina NextSeq500	SKESA v. 2.3.0
EPI_ISL_1131226	hCoV-19/Japan/PG-17305/2020	2020-11-19	Asia / Japan	Human		unknown	unknown	unknown	Original			B.1.1.214	GR	Illumina NextSeq500	A5-miseq v. 20140604
EPI_ISL_1131227	hCoV-19/Japan/PG-17306/2020	2020-11-20	Asia / Japan	Human		unknown	unknown	unknown	Original			B.1.1.284	GR	Illumina NextSeq500	SKESA v. 2.3.0
EPI_ISL_1131228	hCoV-19/Japan/PG-17307/2020	2020-11-20	Asia / Japan	Human		unknown	unknown	unknown	Original			B.1.1.130	GR	Illumina NextSeq500	SKESA v. 2.3.0
EPI_ISL_1131229	hCoV-19/Japan/PG-17308/2020	2020-11-20	Asia / Japan	Human		unknown	unknown	unknown	Original			B.1.1.130	GR	Illumina NextSeq500	SKESA v. 2.3.0
EPI_ISL_1131230	hCoV-19/Japan/PG-17309/2020	2020-11-22	Asia / Japan	Human		unknown	unknown	unknown	Original			B.1.1.130	GR	Illumina NextSeq500	SKESA v. 2.3.0
EPI_ISL_1131231	hCoV-19/Japan/PG-17310/2020	2020-11-21	Asia / Japan	Human		unknown	unknown	unknown	Original			B.1.1.130	GR	Illumina NextSeq500	A5-miseq v. 20140604
EPI_ISL_1131232	hCoV-19/Japan/PG-17311/2020	2020-11-22	Asia / Japan	Human		unknown	unknown	unknown	Original			B.1.1.130	GR	Illumina NextSeq500	SKESA v. 2.3.0
EPI_ISL_1131233	hCoV-19/Japan/PG-17312/2020	2020-11-23	Asia / Japan	Human		unknown	unknown	unknown	Original			B.1.1.130	GR	Illumina NextSeq500	bwa v. 0.7.13-r1126, picard v. 2.10.10, GATK v. 3.8.0, VarScan v. 2.4.3, VCFtools v. 0.1.12b, SKESA v. 2.3.0, A5-miseq v. 20140604
EPI_ISL_1131234	hCoV-19/Japan/PG-17313/2020	2020-11-23	Asia / Japan	Human		unknown	unknown	unknown	Original			B.1.1.101	GR	Illumina NextSeq500	A5-miseq v. 20140604
EPI_ISL_1131235	hCoV-19/Japan/PG-17314/2020	2020-11-24	Asia / Japan	Human		unknown	unknown	unknown	Original			B.1.1.214	GR	Illumina NextSeq500	SKESA v. 2.3.0
EPI_ISL_1131236	hCoV-19/Japan/PG-17315/2020	2020-11-25	Asia / Japan	Human		unknown	unknown	unknown	Original			B.1.1.214	GR	Illumina NextSeq500	SKESA v. 2.3.0
EPI_ISL_1131237	hCoV-19/Japan/PG-17316/2020	2020-11-24	Asia / Japan	Human		unknown	unknown	unknown	Original			B.1.1.130	GR	Illumina NextSeq500	bwa v. 0.7.13-r1126, picard v. 2.10.10, GATK v. 3.8.0, VarScan v. 2.4.3, VCFtools v. 0.1.12b, SKESA v. 2.3.0, A5-miseq v. 20140604
EPI_ISL_1131238	hCoV-19/Japan/PG-17317/2020	2020-11-25	Asia / Japan	Human		unknown	unknown	unknown	Original			B.1.1.130	GR	Illumina NextSeq500	SKESA v. 2.3.0
EPI_ISL_1131239	hCoV-19/Japan/PG-17318/2020	2020-11-27	Asia / Japan	Human		unknown	unknown	unknown	Original			B.1.1.130	GR	Illumina NextSeq500	A5-miseq v. 20140604
EPI_ISL_1131240	hCoV-19/Japan/PG-17319/2020	2020-11-27	Asia / Japan	Human		unknown	unknown	unknown	Original			B.1.1.130	GR	Illumina NextSeq500	SKESA v. 2.3.0
EPI_ISL_1131241	hCoV-19/Japan/PG-17320/2020	2020-11-27	Asia / Japan	Human		unknown	unknown	unknown	Original			B.1.1.130	GR	Illumina NextSeq500	A5-miseq v. 20140604
EPI_ISL_1131242	hCoV-19/Japan/PG-17321/2020	2020-11-28	Asia / Japan	Human		unknown	unknown	unknown	Original			B.1.1.214	GR	Illumina NextSeq500	SKESA v. 2.3.0
EPI_ISL_1131243	hCoV-19/Japan/PG-17322/2020	2020-11-28	Asia / Japan	Human		unknown	unknown	unknown	Original			B.1.1.130	GR	Illumina NextSeq500	A5-miseq v. 20140604
EPI_ISL_1131244	hCoV-19/Japan/PG-17323/2020	2020-11-29	Asia / Japan	Human		unknown	unknown	unknown	Original			B.1.1.130	GR	Illumina NextSeq500	A5-miseq v. 20140604
EPI_ISL_1131245	hCoV-19/Japan/PG-17324/2020	2020-11-29	Asia / Japan	Human		unknown	unknown	unknown	Original			B.1.1.130	GR	Illumina NextSeq500	SKESA v. 2.3.0
EPI_ISL_1131246	hCoV-19/Japan/PG-17325/2020	2020-11-30	Asia / Japan	Human		unknown	unknown	unknown	Original			B.1.1.214	GR	Illumina NextSeq500	SKESA v. 2.3.0
EPI_ISL_1131247	hCoV-19/Japan/PG-17326/2020	2020-11-29	Asia / Japan	Human		unknown	unknown	unknown	Original			B.1.1.130	GR	Illumina NextSeq500	SKESA v. 2.3.0
EPI_ISL_1131248	hCoV-19/Japan/PG-17327/2020	2020-11-30	Asia / Japan	Human		unknown	unknown	unknown	Original			B.1.1.130	GR	Illumina NextSeq500	A5-miseq v. 20140604
EPI_ISL_1131249	hCoV-19/Japan/PG-17328/2020	2020-11-30	Asia / Japan	Human		unknown	unknown	unknown	Original			B.1.1.130	GR	Illumina NextSeq500	A5-miseq v. 20140604
EPI_ISL_1131380	hCoV-19/Japan/PG-17460/2020	2020-11-25	Asia / Japan	Human		unknown	unknown	unknown	Original			B.1.1.214	GR	Illumina NextSeq500	A5-miseq v. 20140604
EPI_ISL_1131612	hCoV-19/Japan/PG-17763/2020	2020-11-02	Asia / Japan	Human		unknown	unknown	unknown	Original			B.1.1.214	GR	Illumina NextSeq2000	SKESA v. 2.3.0
EPI_ISL_1131613	hCoV-19/Japan/PG-17764/2020	2020-11-04	Asia / Japan	Human		unknown	unknown	unknown	Original			B.1.1.214	GR	Illumina NextSeq2000	SKESA v. 2.3.0
EPI_ISL_1131614	hCoV-19/Japan/PG-17765/2020	2020-11-04	Asia / Japan	Human		unknown	unknown	unknown	Original			B.1.1.214	GR	Illumina NextSeq2000	A5-miseq v. 20140604
EPI_ISL_1131615	hCoV-19/Japan/PG-17766/2020	2020-11-04	Asia / Japan	Human		unknown	unknown	unknown	Original			B.1.1.214	GR	Illumina NextSeq2000	SKESA v. 2.3.0
EPI_ISL_1131616	hCoV-19/Japan/PG-17767/2020	2020-11-04	Asia / Japan	Human		unknown	unknown	unknown	Original			B.1.1.214	GR	Illumina NextSeq2000	SKESA v. 2.3.0
EPI_ISL_1131617	hCoV-19/Japan/PG-17768/2020	2020-11-04	Asia / Japan	Human		unknown	unknown	unknown	Original			B.1.1.214	GR	Illumina NextSeq2000	SKESA v. 2.3.0
EPI_ISL_1131618	hCoV-19/Japan/PG-17769/2020	2020-11-04	Asia / Japan	Human		unknown	unknown	unknown	Original			B.1.1.214	GR	Illumina NextSeq2000	SKESA v. 2.3.0
EPI_ISL_1131619	hCoV-19/Japan/PG-17770/2020	2020-11-05	Asia / Japan	Human		unknown	unknown	unknown	Original			B.1.1.214	GR	Illumina NextSeq2000	SKESA v. 2.3.0
EPI_ISL_1131620	hCoV-19/Japan/PG-17771/2020	2020-11-09	Asia / Japan	Human		unknown	unknown	unknown	Original			B.1.1.214	GR	Illumina NextSeq2000	SKESA v. 2.3.0
EPI_ISL_1131621	hCoV-19/Japan/PG-17772/2020	2020-11-09	Asia / Japan	Human		unknown	unknown	unknown	Original			B.1.1.214	GR	Illumina NextSeq2000	SKESA v. 2.3.0
EPI_ISL_1131622	hCoV-19/Japan/PG-17773/2020	2020-11-09	Asia / Japan	Human		unknown	unknown	unknown	Original			B.1.1.214	GR	Illumina NextSeq2000	SKESA v. 2.3.0
EPI_ISL_1131623	hCoV-19/Japan/PG-17774/2020	2020-11-09	Asia / Japan	Human		unknown	unknown	unknown	Original			B.1.1.214	GR	Illumina NextSeq2000	A5-miseq v. 20140604
EPI_ISL_1131624	hCoV-19/Japan/PG-17775/2020	2020-11-10	Asia / Japan	Human		unknown	unknown	unknown	Original			B.1.1.214	GR	Illumina NextSeq2000	SKESA v. 2.3.0
EPI_ISL_1131625	hCoV-19/Japan/PG-17776/2020	2020-11-10	Asia / Japan	Human		unknown	unknown	unknown	Original			B.1.1.214	GR	Illumina NextSeq2000	A5-miseq v. 20140604
EPI_ISL_1131626	hCoV-19/Japan/PG-17777/2020	2020-11-09	Asia / Japan	Human		unknown	unknown	unknown	Original			B.1.1.284	GR	Illumina NextSeq2000	SKESA v. 2.3.0
EPI_ISL_1131627	hCoV-19/Japan/PG-17778/2020	2020-11-12	Asia / Japan	Human		unknown	unknown	unknown	Original			B.1.1.214	GR	Illumina NextSeq2000	A5-miseq v. 20140604
EPI_ISL_1131628	hCoV-19/Japan/PG-17779/2020	2020-11-11	Asia / Japan	Human		unknown	unknown	unknown	Original			B.1.1.284	GR	Illumina NextSeq2000	SKESA v. 2.3.0
EPI_ISL_1131629	hCoV-19/Japan/PG-17780/2020	2020-11-12	Asia / Japan	Human		unknown	unknown	unknown	Original			B.1.1.284	GR	Illumina NextSeq2000	SKESA v. 2.3.0
EPI_ISL_1131630	hCoV-19/Japan/PG-17781/2020	2020-11-12	Asia / Japan	Human		unknown	unknown	unknown	Original			B.1.1.284	GR	Illumina NextSeq2000	SKESA v. 2.3.0
EPI_ISL_1131631	hCoV-19/Japan/PG-17782/2020	2020-11-12	Asia / Japan	Human		unknown	unknown	unknown	Original			B.1.1.284	GR	Illumina NextSeq2000	A5-miseq v. 20140604
EPI_ISL_1131632	hCoV-19/Japan/PG-17783/2020	2020-11-12	Asia / Japan	Human		unknown	unknown	unknown	Original			B.1.1.284	GR	Illumina NextSeq2000	SKESA v. 2.3.0
EPI_ISL_1131633	hCoV-19/Japan/PG-17784/2020	2020-11-12	Asia / Japan	Human		unknown	unknown	unknown	Original			B.1.1.284	GR	Illumina NextSeq2000	SKESA v. 2.3.0
EPI_ISL_1131634	hCoV-19/Japan/PG-17785/2020	2020-11-12	Asia / Japan	Human		unknown	unknown	unknown	Original			B.1.1.284	GR	Illumina NextSeq2000	SKESA v. 2.3.0
EPI_ISL_1131635	hCoV-19/Japan/PG-17786/2020	2020-11-12	Asia / Japan	Human		unknown	unknown	unknown	Original			B.1.1.284	GR	Illumina NextSeq2000	SKESA v. 2.3.0
EPI_ISL_1131636	hCoV-19/Japan/PG-17787/2020	2020-11-12	Asia / Japan	Human		unknown	unknown	unknown	Original			B.1.1.284	GR	Illumina NextSeq2000	A5-miseq v. 20140604
EPI_ISL_1131637	hCoV-19/Japan/PG-17788/2020	2020-11-12	Asia / Japan	Human		unknown	unknown	unknown	Original			B.1.1.284	GR	Illumina NextSeq2000	SKESA v. 2.3.0
EPI_ISL_1131638	hCoV-19/Japan/PG-17789/2020	2020-11-12	Asia / Japan	Human		unknown	unknown	unknown	Original			B.1.1.284	GR	Illumina NextSeq2000	SKESA v. 2.3.0
EPI_ISL_1131639	hCoV-19/Japan/PG-17790/2020	2020-11-12	Asia / Japan	Human		unknown	unknown	unknown	Original			B.1.1.284	GR	Illumina NextSeq2000	SKESA v. 2.3.0
EPI_ISL_1131640	hCoV-19/Japan/PG-17791/2020	2020-11-12	Asia / Japan	Human		unknown	unknown	unknown	Original			B.1.1.284	GR	Illumina NextSeq2000	SKESA v. 2.3.0
EPI_ISL_1131641	hCoV-19/Japan/PG-17792/2020	2020-11-13	Asia / Japan	Human		unknown	unknown	unknown	Original			B.1.1.284	GR	Illumina NextSeq2000	SKESA v. 2.3.0
EPI_ISL_1131642	hCoV-19/Japan/PG-17793/2020	2020-11-13	Asia / Japan	Human		unknown	unknown	unknown	Original			B.1.1.284	GR	Illumina NextSeq2000	SKESA v. 2.3.0
EPI_ISL_1131643	hCoV-19/Japan/PG-17794/2020	2020-11-13	Asia / Japan	Human		unknown	unknown	unknown	Original			B.1.1.284	GR	Illumina NextSeq2000	A5-miseq v. 20140604
EPI_ISL_1131644	hCoV-19/Japan/PG-17795/2020	2020-11-13	Asia / Japan	Human		unknown	unknown	unknown	Original			B.1.1.284	GR	Illumina NextSeq2000	A5-miseq v. 20140604
EPI_ISL_1131645	hCoV-19/Japan/PG-17796/2020	2020-11-13	Asia / Japan	Human		unknown	unknown	unknown	Original			B.1.1.284	GR	Illumina NextSeq2000	A5-miseq v. 20140604
EPI_ISL_1131646	hCoV-19/Japan/PG-17797/2020	2020-11-13	Asia / Japan	Human		unknown	unknown	unknown	Original			B.1.1.284	GR	Illumina NextSeq2000	SKESA v. 2.3.0
EPI_ISL_1131647	hCoV-19/Japan/PG-17798/2020	2020-11-13	Asia / Japan	Human		unknown	unknown	unknown	Original			B.1.1.284	GR	Illumina NextSeq2000	SKESA v. 2.3.0
EPI_ISL_1131648	hCoV-19/Japan/PG-17799/2020	2020-11-13	Asia / Japan	Human		unknown	unknown	unknown	Original			B.1.1.284	GR	Illumina NextSeq2000	SKESA v. 2.3.0
EPI_ISL_1131649	hCoV-19/Japan/PG-17800/2020	2020-11-14	Asia / Japan	Human		unknown	unknown	unknown	Original			B.1.1.284	GR	Illumina NextSeq2000	SKESA v. 2.3.0
EPI_ISL_1131650	hCoV-19/Japan/PG-17802/2020	2020-11-14	Asia / Japan	Human		unknown	unknown	unknown	Original			B.1.1.284	GR	Illumina NextSeq2000	SKESA v. 2.3.0
EPI_ISL_1131651	hCoV-19/Japan/PG-17803/2020	2020-11-14	Asia / Japan	Human		unknown	unknown	unknown	Original			B.1.1.284	GR	Illumina NextSeq2000	SKESA v. 2.3.0
EPI_ISL_1131652	hCoV-19/Japan/PG-17804/2020	2020-11-15	Asia / Japan	Human		unknown	unknown	unknown	Original			B.1.1.284	GR	Illumina NextSeq2000	A5-miseq v. 20140604
EPI_ISL_1131653	hCoV-19/Japan/PG-17805/2020	2020-11-15	Asia / Japan	Human		unknown	unknown	unknown	Original			B.1.1.284	GR	Illumina NextSeq2000	A5-miseq v. 20140604
EPI_ISL_1131654	hCoV-19/Japan/PG-17806/2020	2020-11-16	Asia / Japan	Human		unknown	unknown	unknown	Original			B.1	GH	Illumina NextSeq2000	A5-miseq v. 20140604
EPI_ISL_1131655	hCoV-19/Japan/PG-17807/2020	2020-11-16	Asia / Japan	Human		unknown	unknown	unknown	Original			B.1.1.284	GR	Illumina NextSeq2000	SKESA v. 2.3.0
EPI_ISL_1131656	hCoV-19/Japan/PG-17808/2020	2020-11-16	Asia / Japan	Human		unknown	unknown	unknown	Original			B.1.1.284	GR	Illumina NextSeq2000	A5-miseq v. 20140604
EPI_ISL_1131657	hCoV-19/Japan/PG-17810/2020	2020-11-16	Asia / Japan	Human		unknown	unknown	unknown	Original			B.1.1.284	GR	Illumina NextSeq2000	SKESA v. 2.3.0
EPI_ISL_1131658	hCoV-19/Japan/PG-17811/2020	2020-11-16	Asia / Japan	Human		unknown	unknown	unknown	Original			B.1.1.284	GR	Illumina NextSeq2000	SKESA v. 2.3.0
EPI_ISL_1131659	hCoV-19/Japan/PG-17812/2020	2020-11-16	Asia / Japan	Human		unknown	unknown	unknown	Original			B.1.1.284	GR	Illumina NextSeq2000	SKESA v. 2.3.0
EPI_ISL_1131660	hCoV-19/Japan/PG-17813/2020	2020-11-16	Asia / Japan	Human		unknown	unknown	unknown	Original			B.1.1.214	GR	Illumina NextSeq2000	SKESA v. 2.3.0
EPI_ISL_1131661	hCoV-19/Japan/PG-17814/2020	2020-11-17	Asia / Japan	Human		unknown	unknown	unknown	Original			B.1.1.284	GR	Illumina NextSeq2000	bwa v. 0.7.13-r1126, picard v. 2.10.10, GATK v. 3.8.0, VarScan v. 2.4.3, VCFtools v. 0.1.12b, SKESA v. 2.3.0, A5-miseq v. 20140604
EPI_ISL_1131662	hCoV-19/Japan/PG-17815/2020	2020-11-17	Asia / Japan	Human		unknown	unknown	unknown	Original			B.1.1.284	GR	Illumina NextSeq2000	A5-miseq v. 20140604
EPI_ISL_1131663	hCoV-19/Japan/PG-17816/2020	2020-11-17	Asia / Japan	Human		unknown	unknown	unknown	Original			B.1.1.284	GR	Illumina NextSeq2000	A5-miseq v. 20140604
EPI_ISL_1131664	hCoV-19/Japan/PG-17817/2020	2020-11-17	Asia / Japan	Human		unknown	unknown	unknown	Original			B.1.1.284	GR	Illumina NextSeq2000	SKESA v. 2.3.0
EPI_ISL_1131665	hCoV-19/Japan/PG-17818/2020	2020-11-17	Asia / Japan	Human		unknown	unknown	unknown	Original			B.1.1.284	GR	Illumina NextSeq2000	SKESA v. 2.3.0
EPI_ISL_1131666	hCoV-19/Japan/PG-17819/2020	2020-11-18	Asia / Japan	Human		unknown	unknown	unknown	Original			B.1.1.284	GR	Illumina NextSeq2000	SKESA v. 2.3.0
EPI_ISL_1131667	hCoV-19/Japan/PG-17820/2020	2020-11-18	Asia / Japan	Human		unknown	unknown	unknown	Original			B.1.1.284	GR	Illumina NextSeq2000	SKESA v. 2.3.0
EPI_ISL_1131668	hCoV-19/Japan/PG-17821/2020	2020-11-18	Asia / Japan	Human		unknown	unknown	unknown	Original			B.1.1.284	GR	Illumina NextSeq2000	SKESA v. 2.3.0
EPI_ISL_1131669	hCoV-19/Japan/PG-17822/2020	2020-11-18	Asia / Japan	Human		unknown	unknown	unknown	Original			B.1.1.284	GR	Illumina NextSeq2000	SKESA v. 2.3.0
EPI_ISL_1131670	hCoV-19/Japan/PG-17823/2020	2020-11-19	Asia / Japan	Human		unknown	unknown	unknown	Original			B.1.1.284	GR	Illumina NextSeq2000	SKESA v. 2.3.0
EPI_ISL_1131671	hCoV-19/Japan/PG-17824/2020	2020-11-19	Asia / Japan	Human		unknown	unknown	unknown	Original			B.1.1.284	GR	Illumina NextSeq2000	SKESA v. 2.3.0
EPI_ISL_1131672	hCoV-19/Japan/PG-17825/2020	2020-11-19	Asia / Japan	Human		unknown	unknown	unknown	Original			B.1.1.284	GR	Illumina NextSeq2000	SKESA v. 2.3.0
EPI_ISL_1131673	hCoV-19/Japan/PG-17826/2020	2020-11-19	Asia / Japan	Human		unknown	unknown	unknown	Original			B.1.1.284	GR	Illumina NextSeq2000	SKESA v. 2.3.0
EPI_ISL_1131674	hCoV-19/Japan/PG-17827/2020	2020-11-19	Asia / Japan	Human		unknown	unknown	unknown	Original			B.1.1.284	GR	Illumina NextSeq2000	SKESA v. 2.3.0
EPI_ISL_1131675	hCoV-19/Japan/PG-17828/2020	2020-11-19	Asia / Japan	Human		unknown	unknown	unknown	Original			B.1.1.284	GR	Illumina NextSeq2000	A5-miseq v. 20140604
EPI_ISL_1131676	hCoV-19/Japan/PG-17829/2020	2020-11-19	Asia / Japan	Human		unknown	unknown	unknown	Original			B.1.1.284	GR	Illumina NextSeq2000	SKESA v. 2.3.0
EPI_ISL_1131677	hCoV-19/Japan/PG-17830/2020	2020-11-19	Asia / Japan	Human		unknown	unknown	unknown	Original			B.1.1.284	GR	Illumina NextSeq2000	SKESA v. 2.3.0
EPI_ISL_1131678	hCoV-19/Japan/PG-17831/2020	2020-11-19	Asia / Japan	Human		unknown	unknown	unknown	Original			B.1.1.284	GR	Illumina NextSeq2000	SKESA v. 2.3.0
EPI_ISL_1131679	hCoV-19/Japan/PG-17832/2020	2020-11-19	Asia / Japan	Human		unknown	unknown	unknown	Original			B.1.1.284	GR	Illumina NextSeq2000	A5-miseq v. 20140604
EPI_ISL_1131680	hCoV-19/Japan/PG-17833/2020	2020-11-19	Asia / Japan	Human		unknown	unknown	unknown	Original			B.1.1.284	GR	Illumina NextSeq2000	SKESA v. 2.3.0
EPI_ISL_1131681	hCoV-19/Japan/PG-17834/2020	2020-11-19	Asia / Japan	Human		unknown	unknown	unknown	Original			B.1.1.284	GR	Illumina NextSeq2000	A5-miseq v. 20140604
EPI_ISL_1131682	hCoV-19/Japan/PG-17835/2020	2020-11-19	Asia / Japan	Human		unknown	unknown	unknown	Original			B.1.1.296	GR	Illumina NextSeq2000	SKESA v. 2.3.0
EPI_ISL_1131683	hCoV-19/Japan/PG-17836/2020	2020-11-19	Asia / Japan	Human		unknown	unknown	unknown	Original			B.1.1.296	GR	Illumina NextSeq2000	SKESA v. 2.3.0
EPI_ISL_1131684	hCoV-19/Japan/PG-17837/2020	2020-11-19	Asia / Japan	Human		unknown	unknown	unknown	Original			B.1.1.296	GR	Illumina NextSeq2000	A5-miseq v. 20140604
EPI_ISL_1131685	hCoV-19/Japan/PG-17838/2020	2020-11-19	Asia / Japan	Human		unknown	unknown	unknown	Original			B.1.1.284	GR	Illumina NextSeq2000	A5-miseq v. 20140604
EPI_ISL_1131686	hCoV-19/Japan/PG-17839/2020	2020-11-19	Asia / Japan	Human		unknown	unknown	unknown	Original			B.1.1.284	GR	Illumina NextSeq2000	SKESA v. 2.3.0
EPI_ISL_1131687	hCoV-19/Japan/PG-17840/2020	2020-11-19	Asia / Japan	Human		unknown	unknown	unknown	Original			B.1.1.284	GR	Illumina NextSeq2000	SKESA v. 2.3.0
EPI_ISL_1131688	hCoV-19/Japan/PG-17841/2020	2020-11-20	Asia / Japan	Human		unknown	unknown	unknown	Original			B.1.1.284	GR	Illumina NextSeq2000	SKESA v. 2.3.0
EPI_ISL_1131689	hCoV-19/Japan/PG-17842/2020	2020-11-20	Asia / Japan	Human		unknown	unknown	unknown	Original			B.1.1.284	GR	Illumina NextSeq2000	A5-miseq v. 20140604
EPI_ISL_1131690	hCoV-19/Japan/PG-17843/2020	2020-11-20	Asia / Japan	Human		unknown	unknown	unknown	Original			B.1.1.214	GR	Illumina NextSeq2000	SKESA v. 2.3.0
EPI_ISL_1131691	hCoV-19/Japan/PG-17844/2020	2020-11-20	Asia / Japan	Human		unknown	unknown	unknown	Original			B.1.1.214	GR	Illumina NextSeq2000	SKESA v. 2.3.0
EPI_ISL_1131692	hCoV-19/Japan/PG-17845/2020	2020-11-20	Asia / Japan	Human		unknown	unknown	unknown	Original			B.1.1.284	GR	Illumina NextSeq2000	SKESA v. 2.3.0
EPI_ISL_1131693	hCoV-19/Japan/PG-17846/2020	2020-11-20	Asia / Japan	Human		unknown	unknown	unknown	Original			B.1.1.284	GR	Illumina NextSeq2000	SKESA v. 2.3.0
EPI_ISL_1131694	hCoV-19/Japan/PG-17847/2020	2020-11-21	Asia / Japan	Human		unknown	unknown	unknown	Original			B.1.1.284	GR	Illumina NextSeq2000	SKESA v. 2.3.0
EPI_ISL_1131695	hCoV-19/Japan/PG-17848/2020	2020-11-21	Asia / Japan	Human		unknown	unknown	unknown	Original			B.1.1.214	GR	Illumina NextSeq2000	SKESA v. 2.3.0
EPI_ISL_1131696	hCoV-19/Japan/PG-17849/2020	2020-11-21	Asia / Japan	Human		unknown	unknown	unknown	Original			B.1.1.284	GR	Illumina NextSeq2000	SKESA v. 2.3.0
EPI_ISL_1131697	hCoV-19/Japan/PG-17850/2020	2020-11-22	Asia / Japan	Human		unknown	unknown	unknown	Original			B.1.1.214	GR	Illumina NextSeq2000	SKESA v. 2.3.0
EPI_ISL_1131698	hCoV-19/Japan/PG-17851/2020	2020-11-22	Asia / Japan	Human		unknown	unknown	unknown	Original			B.1.1.284	GR	Illumina NextSeq2000	SKESA v. 2.3.0
EPI_ISL_1131699	hCoV-19/Japan/PG-17852/2020	2020-11-24	Asia / Japan	Human		unknown	unknown	unknown	Original			B.1.1.284	GR	Illumina NextSeq2000	A5-miseq v. 20140604
EPI_ISL_1131700	hCoV-19/Japan/PG-17853/2020	2020-11-25	Asia / Japan	Human		unknown	unknown	unknown	Original			B.1.1.284	GR	Illumina NextSeq2000	SKESA v. 2.3.0
EPI_ISL_1131701	hCoV-19/Japan/PG-17854/2020	2020-11-26	Asia / Japan	Human		unknown	unknown	unknown	Original			B.1.1.284	GR	Illumina NextSeq2000	SKESA v. 2.3.0
EPI_ISL_1131702	hCoV-19/Japan/PG-17855/2020	2020-11-26	Asia / Japan	Human		unknown	unknown	unknown	Original			B.1.1.284	GR	Illumina NextSeq2000	SKESA v. 2.3.0
EPI_ISL_1131703	hCoV-19/Japan/PG-17856/2020	2020-11-26	Asia / Japan	Human		unknown	unknown	unknown	Original			B.1.1.284	GR	Illumina NextSeq2000	SKESA v. 2.3.0
EPI_ISL_1131704	hCoV-19/Japan/PG-17857/2020	2020-11-27	Asia / Japan	Human		unknown	unknown	unknown	Original			B.1.1.284	GR	Illumina NextSeq2000	A5-miseq v. 20140604
EPI_ISL_1131705	hCoV-19/Japan/PG-17858/2020	2020-11-27	Asia / Japan	Human		unknown	unknown	unknown	Original			B.1.1.284	GR	Illumina NextSeq2000	SKESA v. 2.3.0
EPI_ISL_1131706	hCoV-19/Japan/PG-17859/2020	2020-11-27	Asia / Japan	Human		unknown	unknown	unknown	Original			B.1.1.214	GR	Illumina NextSeq2000	SKESA v. 2.3.0
EPI_ISL_1131707	hCoV-19/Japan/PG-17860/2020	2020-11-27	Asia / Japan	Human		unknown	unknown	unknown	Original			B.1.1.284	GR	Illumina NextSeq2000	SKESA v. 2.3.0
EPI_ISL_1131708	hCoV-19/Japan/PG-17861/2020	2020-11-27	Asia / Japan	Human		unknown	unknown	unknown	Original			B.1.1.284	GR	Illumina NextSeq2000	SKESA v. 2.3.0
EPI_ISL_1131709	hCoV-19/Japan/PG-17862/2020	2020-11-27	Asia / Japan	Human		unknown	unknown	unknown	Original			B.1.1.284	GR	Illumina NextSeq2000	A5-miseq v. 20140604
EPI_ISL_1131710	hCoV-19/Japan/PG-17863/2020	2020-11-28	Asia / Japan	Human		unknown	unknown	unknown	Original			B.1.1.284	GR	Illumina NextSeq2000	SKESA v. 2.3.0
EPI_ISL_1131711	hCoV-19/Japan/PG-17864/2020	2020-11-29	Asia / Japan	Human		unknown	unknown	unknown	Original			B.1.1.284	GR	Illumina NextSeq2000	SKESA v. 2.3.0
EPI_ISL_1131712	hCoV-19/Japan/PG-17865/2020	2020-11-30	Asia / Japan	Human		unknown	unknown	unknown	Original			B.1.1.214	GR	Illumina NextSeq2000	SKESA v. 2.3.0
EPI_ISL_1131713	hCoV-19/Japan/PG-17866/2020	2020-11-30	Asia / Japan	Human		unknown	unknown	unknown	Original			B.1.1.214	GR	Illumina NextSeq2000	SKESA v. 2.3.0
EPI_ISL_1131714	hCoV-19/Japan/PG-17867/2020	2020-11-30	Asia / Japan	Human		unknown	unknown	unknown	Original			B.1.1.214	GR	Illumina NextSeq2000	SKESA v. 2.3.0
EPI_ISL_1132648	hCoV-19/USA/AZ-ASPHL-2928/2020	2020-11-24	North America / USA / Arizona / Yuma	Human		unknown	unknown	unknown	Original	Nasopharyngeal swab		B.1.2	GH	Illumina MiSeq
EPI_ISL_1132971	hCoV-19/USA/MI-UM-10037012898/2020	2020-11-18	North America / USA / Michigan	Human		unknown	unknown	unknown	Original			B.1.2	GH	Illumina MiSeq	BWA-MEM, iVar
EPI_ISL_1132973	hCoV-19/USA/MI-UM-10037010410/2020	2020-11-18	North America / USA / Michigan	Human		unknown	unknown	unknown	Original			B.1.234	G	Illumina MiSeq	BWA-MEM, iVar
EPI_ISL_1132975	hCoV-19/USA/MI-UM-10037018220/2020	2020-11-18	North America / USA / Michigan	Human		unknown	unknown	unknown	Original			B.1.2	GH	Illumina MiSeq	BWA-MEM, iVar
EPI_ISL_1132978	hCoV-19/USA/MI-UM-10037017041/2020	2020-11-18	North America / USA / Michigan	Human		unknown	unknown	unknown	Original			B.1.2	GH	Illumina MiSeq	BWA-MEM, iVar
EPI_ISL_1132987	hCoV-19/USA/MI-UM-10036992573/2020	2020-11-17	North America / USA / Michigan	Human		unknown	unknown	unknown	Original			B.1.2	GH	Illumina MiSeq	BWA-MEM, iVar
EPI_ISL_1132988	hCoV-19/USA/MI-UM-10037046492/2020	2020-11-20	North America / USA / Michigan	Human		unknown	unknown	unknown	Original			B.1.2	GH	Illumina MiSeq	BWA-MEM, iVar
EPI_ISL_1132990	hCoV-19/USA/MI-UM-10037029098/2020	2020-11-19	North America / USA / Michigan	Human		unknown	unknown	unknown	Original			B.1.240	G	Illumina MiSeq	BWA-MEM, iVar
EPI_ISL_1132992	hCoV-19/USA/MI-UM-10037040974/2020	2020-11-20	North America / USA / Michigan	Human		unknown	unknown	unknown	Original			B.1.2	GH	Illumina MiSeq	BWA-MEM, iVar
EPI_ISL_1132998	hCoV-19/USA/MI-UM-10037033128/2020	2020-11-19	North America / USA / Michigan	Human		unknown	unknown	unknown	Original			B.1.2	GH	Illumina MiSeq	BWA-MEM, iVar
EPI_ISL_1133001	hCoV-19/USA/MI-UM-10037013207/2020	2020-11-18	North America / USA / Michigan	Human		unknown	unknown	unknown	Original			B.1.2	GH	Illumina MiSeq	BWA-MEM, iVar
EPI_ISL_1133003	hCoV-19/USA/MI-UM-10037035204/2020	2020-11-19	North America / USA / Michigan	Human		unknown	unknown	unknown	Original			B.1.2	GH	Illumina MiSeq	BWA-MEM, iVar
EPI_ISL_1133004	hCoV-19/USA/MI-UM-10037035488/2020	2020-11-19	North America / USA / Michigan	Human		unknown	unknown	unknown	Original			B.1.311	GH	Illumina MiSeq	BWA-MEM, iVar
EPI_ISL_1133005	hCoV-19/USA/MI-UM-10037037058/2020	2020-11-19	North America / USA / Michigan	Human		unknown	unknown	unknown	Original			B.1.1.186	GR	Illumina MiSeq	BWA-MEM, iVar
EPI_ISL_1133006	hCoV-19/USA/MI-UM-10037029551/2020	2020-11-19	North America / USA / Michigan	Human		unknown	unknown	unknown	Original			B.1.240	G	Illumina MiSeq	BWA-MEM, iVar
EPI_ISL_1133014	hCoV-19/USA/MI-UM-10037031950/2020	2020-11-19	North America / USA / Michigan	Human		unknown	unknown	unknown	Original			B.1.2	GH	Illumina MiSeq	BWA-MEM, iVar
EPI_ISL_1133017	hCoV-19/USA/MI-UM-10037027501/2020	2020-11-19	North America / USA / Michigan	Human		unknown	unknown	unknown	Original			B.1.361	GH	Illumina MiSeq	BWA-MEM, iVar
EPI_ISL_1133018	hCoV-19/USA/MI-UM-10037032441/2020	2020-11-19	North America / USA / Michigan	Human		unknown	unknown	unknown	Original			B.1.36	GH	Illumina MiSeq	BWA-MEM, iVar
EPI_ISL_1133019	hCoV-19/USA/MI-UM-10037028728/2020	2020-11-19	North America / USA / Michigan	Human		unknown	unknown	unknown	Original			B.1.2	GH	Illumina MiSeq	BWA-MEM, iVar
EPI_ISL_1133020	hCoV-19/USA/MI-UM-10037036603/2020	2020-11-19	North America / USA / Michigan	Human		unknown	unknown	unknown	Original			B.1.2	GH	Illumina MiSeq	BWA-MEM, iVar
EPI_ISL_1133021	hCoV-19/USA/MI-UM-10037037626/2020	2020-11-19	North America / USA / Michigan	Human		unknown	unknown	unknown	Original			B.1.2	GH	Illumina MiSeq	BWA-MEM, iVar
EPI_ISL_1133022	hCoV-19/USA/MI-UM-10037035844/2020	2020-11-19	North America / USA / Michigan	Human		unknown	unknown	unknown	Original			B.1.2	GH	Illumina MiSeq	BWA-MEM, iVar
EPI_ISL_1133023	hCoV-19/USA/MI-UM-10037034687/2020	2020-11-19	North America / USA / Michigan	Human		unknown	unknown	unknown	Original			B.1.2	GH	Illumina MiSeq	BWA-MEM, iVar
EPI_ISL_1133027	hCoV-19/USA/MI-UM-10037028145/2020	2020-11-19	North America / USA / Michigan	Human		unknown	unknown	unknown	Original			B.1.2	GH	Illumina MiSeq	BWA-MEM, iVar
EPI_ISL_1133028	hCoV-19/USA/MI-UM-10037025710/2020	2020-11-19	North America / USA / Michigan	Human		unknown	unknown	unknown	Original			B.1.2	GH	Illumina MiSeq	BWA-MEM, iVar
EPI_ISL_1133030	hCoV-19/USA/MI-UM-10037032483/2020	2020-11-19	North America / USA / Michigan	Human		unknown	unknown	unknown	Original			B.1.2	GH	Illumina MiSeq	BWA-MEM, iVar
EPI_ISL_1133033	hCoV-19/USA/MI-UM-10037048558/2020	2020-11-20	North America / USA / Michigan	Human		unknown	unknown	unknown	Original			B.1.2	GH	Illumina MiSeq	BWA-MEM, iVar
EPI_ISL_1133035	hCoV-19/USA/MI-UM-10037063066/2020	2020-11-21	North America / USA / Michigan	Human		unknown	unknown	unknown	Original			B.1.2	GH	Illumina MiSeq	BWA-MEM, iVar
EPI_ISL_1133038	hCoV-19/USA/MI-UM-10037048730/2020	2020-11-20	North America / USA / Michigan	Human		unknown	unknown	unknown	Original			B.1.2	GH	Illumina MiSeq	BWA-MEM, iVar
EPI_ISL_1133039	hCoV-19/USA/MI-UM-10037044441/2020	2020-11-20	North America / USA / Michigan	Human		unknown	unknown	unknown	Original			B.1.2	GH	Illumina MiSeq	BWA-MEM, iVar
EPI_ISL_1133040	hCoV-19/USA/MI-UM-10037044274/2020	2020-11-20	North America / USA / Michigan	Human		unknown	unknown	unknown	Original			B.1.2	GH	Illumina MiSeq	BWA-MEM, iVar
EPI_ISL_1133041	hCoV-19/USA/MI-UM-10037053013/2020	2020-11-20	North America / USA / Michigan	Human		unknown	unknown	unknown	Original			B.1.232	G	Illumina MiSeq	BWA-MEM, iVar
EPI_ISL_1133042	hCoV-19/USA/MI-UM-10037044509/2020	2020-11-20	North America / USA / Michigan	Human		unknown	unknown	unknown	Original			B.1.2	GH	Illumina MiSeq	BWA-MEM, iVar
EPI_ISL_1133044	hCoV-19/USA/MI-UM-10037052750/2020	2020-11-20	North America / USA / Michigan	Human		unknown	unknown	unknown	Original			B.1.2	GH	Illumina MiSeq	BWA-MEM, iVar
EPI_ISL_1133045	hCoV-19/USA/MI-UM-10037056747/2020	2020-11-20	North America / USA / Michigan	Human		unknown	unknown	unknown	Original			B.1.2	GH	Illumina MiSeq	BWA-MEM, iVar
EPI_ISL_1133047	hCoV-19/USA/MI-UM-10037047157/2020	2020-11-20	North America / USA / Michigan	Human		unknown	unknown	unknown	Original			B.1.2	GH	Illumina MiSeq	BWA-MEM, iVar
EPI_ISL_1133048	hCoV-19/USA/MI-UM-10037057016/2020	2020-11-20	North America / USA / Michigan	Human		unknown	unknown	unknown	Original			B.1.369	GH	Illumina MiSeq	BWA-MEM, iVar
EPI_ISL_1133049	hCoV-19/USA/MI-UM-10037066635/2020	2020-11-21	North America / USA / Michigan	Human		unknown	unknown	unknown	Original			B.1.2	GH	Illumina MiSeq	BWA-MEM, iVar
EPI_ISL_1133051	hCoV-19/USA/MI-UM-10037046324/2020	2020-11-20	North America / USA / Michigan	Human		unknown	unknown	unknown	Original			B.1.2	GH	Illumina MiSeq	BWA-MEM, iVar
EPI_ISL_1133052	hCoV-19/USA/MI-UM-10037055083/2020	2020-11-20	North America / USA / Michigan	Human		unknown	unknown	unknown	Original			B.1.2	GH	Illumina MiSeq	BWA-MEM, iVar
EPI_ISL_1133053	hCoV-19/USA/MI-UM-10037063483/2020	2020-11-21	North America / USA / Michigan	Human		unknown	unknown	unknown	Original			B.1.2	GH	Illumina MiSeq	BWA-MEM, iVar
EPI_ISL_1133057	hCoV-19/USA/MI-UM-10037055648/2020	2020-11-20	North America / USA / Michigan	Human		unknown	unknown	unknown	Original			B.1.311	GH	Illumina MiSeq	BWA-MEM, iVar
EPI_ISL_1133058	hCoV-19/USA/MI-UM-10037057006/2020	2020-11-20	North America / USA / Michigan	Human		unknown	unknown	unknown	Original			B.1.2	GH	Illumina MiSeq	BWA-MEM, iVar
EPI_ISL_1133059	hCoV-19/USA/MI-UM-10037056143/2020	2020-11-20	North America / USA / Michigan	Human		unknown	unknown	unknown	Original			B.1.2	GH	Illumina MiSeq	BWA-MEM, iVar
EPI_ISL_1133062	hCoV-19/USA/MI-UM-10037057387/2020	2020-11-20	North America / USA / Michigan	Human		unknown	unknown	unknown	Original			B.1.240	G	Illumina MiSeq	BWA-MEM, iVar
EPI_ISL_1133063	hCoV-19/USA/MI-UM-10037055855/2020	2020-11-20	North America / USA / Michigan	Human		unknown	unknown	unknown	Original			B.1.160	GH	Illumina MiSeq	BWA-MEM, iVar
EPI_ISL_1133067	hCoV-19/USA/MI-UM-10037055764/2020	2020-11-20	North America / USA / Michigan	Human		unknown	unknown	unknown	Original			B.1.2	GH	Illumina MiSeq	BWA-MEM, iVar
EPI_ISL_1133068	hCoV-19/USA/MI-UM-10037067332/2020	2020-11-21	North America / USA / Michigan	Human		unknown	unknown	unknown	Original			B.1.2	GH	Illumina MiSeq	BWA-MEM, iVar
EPI_ISL_1133069	hCoV-19/USA/MI-UM-10037056156/2020	2020-11-20	North America / USA / Michigan	Human		unknown	unknown	unknown	Original			B.1.2	GH	Illumina MiSeq	BWA-MEM, iVar
EPI_ISL_1133070	hCoV-19/USA/MI-UM-10037064869/2020	2020-11-21	North America / USA / Michigan	Human		unknown	unknown	unknown	Original			B.1.361	GH	Illumina MiSeq	BWA-MEM, iVar
EPI_ISL_1133071	hCoV-19/USA/MI-UM-10037086538/2020	2020-11-23	North America / USA / Michigan	Human		unknown	unknown	unknown	Original			B.1.361	GH	Illumina MiSeq	BWA-MEM, iVar
EPI_ISL_1133072	hCoV-19/USA/MI-UM-10037067069/2020	2020-11-21	North America / USA / Michigan	Human		unknown	unknown	unknown	Original			B.1.2	GH	Illumina MiSeq	BWA-MEM, iVar
EPI_ISL_1133073	hCoV-19/USA/MI-UM-10037085764/2020	2020-11-23	North America / USA / Michigan	Human		unknown	unknown	unknown	Original			B.1.2	GH	Illumina MiSeq	BWA-MEM, iVar
EPI_ISL_1133074	hCoV-19/USA/MI-UM-10037080064/2020	2020-11-23	North America / USA / Michigan	Human		unknown	unknown	unknown	Original			B.1.2	GH	Illumina MiSeq	BWA-MEM, iVar
EPI_ISL_1133076	hCoV-19/USA/MI-UM-10037067066/2020	2020-11-21	North America / USA / Michigan	Human		unknown	unknown	unknown	Original			B.1.2	GH	Illumina MiSeq	BWA-MEM, iVar
EPI_ISL_1133077	hCoV-19/USA/MI-UM-10037072069/2020	2020-11-22	North America / USA / Michigan	Human		unknown	unknown	unknown	Original			B.1.361	GH	Illumina MiSeq	BWA-MEM, iVar
EPI_ISL_1133078	hCoV-19/USA/MI-UM-10037088897/2020	2020-11-23	North America / USA / Michigan	Human		unknown	unknown	unknown	Original			B.1.1.59	GR	Illumina MiSeq	BWA-MEM, iVar
EPI_ISL_1133079	hCoV-19/USA/MI-UM-10037065555/2020	2020-11-21	North America / USA / Michigan	Human		unknown	unknown	unknown	Original			B.1.2	GH	Illumina MiSeq	BWA-MEM, iVar
EPI_ISL_1133080	hCoV-19/USA/MI-UM-10037063733/2020	2020-11-21	North America / USA / Michigan	Human		unknown	unknown	unknown	Original			B.1	G	Illumina MiSeq	BWA-MEM, iVar
EPI_ISL_1133082	hCoV-19/USA/MI-UM-10037067448/2020	2020-11-21	North America / USA / Michigan	Human		unknown	unknown	unknown	Original			B.1.361	GH	Illumina MiSeq	BWA-MEM, iVar
EPI_ISL_1133083	hCoV-19/USA/MI-UM-10037066991/2020	2020-11-21	North America / USA / Michigan	Human		unknown	unknown	unknown	Original			B.1.2	GH	Illumina MiSeq	BWA-MEM, iVar
EPI_ISL_1133084	hCoV-19/USA/MI-UM-10037086102/2020	2020-11-23	North America / USA / Michigan	Human		unknown	unknown	unknown	Original			B.1.1.59	GR	Illumina MiSeq	BWA-MEM, iVar
EPI_ISL_1133085	hCoV-19/USA/MI-UM-10037066672/2020	2020-11-21	North America / USA / Michigan	Human		unknown	unknown	unknown	Original			B.1.2	GH	Illumina MiSeq	BWA-MEM, iVar
EPI_ISL_1133086	hCoV-19/USA/MI-UM-10037087112/2020	2020-11-23	North America / USA / Michigan	Human		unknown	unknown	unknown	Original			B.1.2	GH	Illumina MiSeq	BWA-MEM, iVar
EPI_ISL_1133087	hCoV-19/USA/MI-UM-10037083396/2020	2020-11-23	North America / USA / Michigan	Human		unknown	unknown	unknown	Original			B.1.361	GH	Illumina MiSeq	BWA-MEM, iVar
EPI_ISL_1133089	hCoV-19/USA/MI-UM-10037063031/2020	2020-11-21	North America / USA / Michigan	Human		unknown	unknown	unknown	Original			B.1.2	GH	Illumina MiSeq	BWA-MEM, iVar
EPI_ISL_1133090	hCoV-19/USA/MI-UM-10037086049/2020	2020-11-23	North America / USA / Michigan	Human		unknown	unknown	unknown	Original			B.1.2	GH	Illumina MiSeq	BWA-MEM, iVar
EPI_ISL_1133091	hCoV-19/USA/MI-UM-10037082994/2020	2020-11-23	North America / USA / Michigan	Human		unknown	unknown	unknown	Original			B.1.2	GH	Illumina MiSeq	BWA-MEM, iVar
EPI_ISL_1133092	hCoV-19/USA/MI-UM-10037085652/2020	2020-11-23	North America / USA / Michigan	Human		unknown	unknown	unknown	Original			B.1.2	GH	Illumina MiSeq	BWA-MEM, iVar
EPI_ISL_1133093	hCoV-19/USA/MI-UM-10037086989/2020	2020-11-23	North America / USA / Michigan	Human		unknown	unknown	unknown	Original			B.1.2	GH	Illumina MiSeq	BWA-MEM, iVar
EPI_ISL_1133094	hCoV-19/USA/MI-UM-10037088414/2020	2020-11-23	North America / USA / Michigan	Human		unknown	unknown	unknown	Original			B.1.2	GH	Illumina MiSeq	BWA-MEM, iVar
EPI_ISL_1133095	hCoV-19/USA/MI-UM-10037087362/2020	2020-11-23	North America / USA / Michigan	Human		unknown	unknown	unknown	Original			B.1.2	GH	Illumina MiSeq	BWA-MEM, iVar
EPI_ISL_1133096	hCoV-19/USA/MI-UM-10037085838/2020	2020-11-23	North America / USA / Michigan	Human		unknown	unknown	unknown	Original			B.1.2	GH	Illumina MiSeq	BWA-MEM, iVar
EPI_ISL_1133097	hCoV-19/USA/MI-UM-10037086832/2020	2020-11-23	North America / USA / Michigan	Human		unknown	unknown	unknown	Original			B.1.2	GH	Illumina MiSeq	BWA-MEM, iVar
EPI_ISL_1133098	hCoV-19/USA/MI-UM-10037083983/2020	2020-11-23	North America / USA / Michigan	Human		unknown	unknown	unknown	Original			B.1.234	G	Illumina MiSeq	BWA-MEM, iVar
EPI_ISL_1133099	hCoV-19/USA/MI-UM-10037083318/2020	2020-11-23	North America / USA / Michigan	Human		unknown	unknown	unknown	Original			B.1.234	G	Illumina MiSeq	BWA-MEM, iVar
EPI_ISL_1133222	hCoV-19/USA/AZ-ASPHL-2960/2020	2020-11-24	North America / USA / Arizona / Yuma County	Human		unknown	unknown	unknown	Original	Nasopharyngeal swab		B.1.2	GH	Illumina MiSeq
EPI_ISL_1137039	hCoV-19/USA/DE-DHSS-B1061933/2021	2020-11-30	North America / USA / Delaware / Smyrna	Human		unknown	unknown	unknown	Original			B.1	GH	Illumina Miseq	DRAGEN
EPI_ISL_1137040	hCoV-19/USA/DE-DHSS-B1061906/2021	2020-11-29	North America / USA / Delaware / Smyrna	Human		unknown	unknown	unknown	Original			B.1.2	GH	Illumina Miseq	DRAGEN
EPI_ISL_1137044	hCoV-19/USA/DE-DHSS-B1061930/2021	2020-11-18	North America / USA / Delaware / Smyrna	Human		unknown	unknown	unknown	Original			B.1.243	G	Illumina Miseq	DRAGEN
EPI_ISL_1137047	hCoV-19/USA/DE-DHSS-B1061923/2021	2020-11-09	North America / USA / Delaware / Smyrna	Human		unknown	unknown	unknown	Original			B.1.2	GH	Illumina Miseq	DRAGEN
EPI_ISL_1137173	hCoV-19/USA/PA-MGEL-01184/2020	2020-11-29	North America / USA / Pennsylvania / Allegheny County / Pittsburgh	Human		unknown	unknown	unknown	Original	Nasopharyngeal swab		B.1.349	GH	Illumina Nextseq	breseq v0.34; gdtools	Gap of 3 nucleotides when compared to the reference sequence.	info
EPI_ISL_1137209	hCoV-19/USA/PA-MGEL-01215/2020	2020-11-30	North America / USA / Pennsylvania / Allegheny County / Pittsburgh	Human		unknown	unknown	unknown	Original	Nasopharyngeal swab		B.1.243	G	Illumina Nextseq	breseq v0.34; gdtools
EPI_ISL_1137210	hCoV-19/USA/PA-MGEL-01198/2020	2020-11-30	North America / USA / Pennsylvania / Allegheny County / Pittsburgh	Human		unknown	unknown	unknown	Original	Nasopharyngeal swab		B.1.361	GH	Illumina Nextseq	breseq v0.34; gdtools
EPI_ISL_1137211	hCoV-19/USA/PA-MGEL-01203/2020	2020-11-30	North America / USA / Pennsylvania / Allegheny County / Pittsburgh	Human		unknown	unknown	unknown	Original	Nasopharyngeal swab		B.1.361	GH	Illumina Nextseq	breseq v0.34; gdtools
EPI_ISL_1137212	hCoV-19/USA/PA-MGEL-01187/2020	2020-11-29	North America / USA / Pennsylvania / Allegheny County / Pittsburgh	Human		unknown	unknown	unknown	Original	Nasopharyngeal swab		B.1.2	GH	Illumina Nextseq	breseq v0.34; gdtools
EPI_ISL_1137213	hCoV-19/USA/PA-MGEL-01131/2020	2020-11-28	North America / USA / Pennsylvania / Allegheny County / Pittsburgh	Human		unknown	unknown	unknown	Original	Nasopharyngeal swab		B.1.428	GH	Illumina Nextseq	breseq v0.34; gdtools
EPI_ISL_1137214	hCoV-19/USA/PA-MGEL-01127/2020	2020-11-28	North America / USA / Pennsylvania / Allegheny County / Pittsburgh	Human		unknown	unknown	unknown	Original	Nasopharyngeal swab		B.1.361	GH	Illumina Nextseq	breseq v0.34; gdtools
EPI_ISL_1137215	hCoV-19/USA/PA-MGEL-01186/2020	2020-11-26	North America / USA / Pennsylvania / Allegheny County / Pittsburgh	Human		unknown	unknown	unknown	Original	Nasopharyngeal swab		B.1.2	GH	Illumina Nextseq	breseq v0.34; gdtools
EPI_ISL_1137216	hCoV-19/USA/PA-MGEL-01110/2020	2020-11-23	North America / USA / Pennsylvania / Allegheny County / Pittsburgh	Human		unknown	unknown	unknown	Original	Nasopharyngeal swab		B.1.2	GH	Illumina Nextseq	breseq v0.34; gdtools
EPI_ISL_1137217	hCoV-19/USA/PA-MGEL-01082/2020	2020-11-14	North America / USA / Pennsylvania / Allegheny County / Pittsburgh	Human		unknown	unknown	unknown	Original	Nasopharyngeal swab		B.1.311	GH	Illumina Nextseq	breseq v0.34; gdtools
EPI_ISL_1137218	hCoV-19/USA/PA-MGEL-01080/2020	2020-11-14	North America / USA / Pennsylvania / Allegheny County / Pittsburgh	Human		unknown	unknown	unknown	Original	Nasopharyngeal swab		B.1.306	GH	Illumina Nextseq	breseq v0.34; gdtools
EPI_ISL_1137219	hCoV-19/USA/PA-MGEL-01067/2020	2020-11-14	North America / USA / Pennsylvania / Allegheny County / Pittsburgh	Human		unknown	unknown	unknown	Original	Nasopharyngeal swab		B.1.2	GH	Illumina Nextseq	breseq v0.34; gdtools
EPI_ISL_1137221	hCoV-19/USA/PA-MGEL-01076/2020	2020-11-13	North America / USA / Pennsylvania / Allegheny County / Pittsburgh	Human		unknown	unknown	unknown	Original	Nasopharyngeal swab		B.1.400	G	Illumina Nextseq	breseq v0.34; gdtools
EPI_ISL_1137222	hCoV-19/USA/PA-MGEL-01072/2020	2020-11-13	North America / USA / Pennsylvania / Allegheny County / Pittsburgh	Human		unknown	unknown	unknown	Original	Nasopharyngeal swab		B.1.2	GH	Illumina Nextseq	breseq v0.34; gdtools
EPI_ISL_1137223	hCoV-19/USA/PA-MGEL-01062/2020	2020-11-13	North America / USA / Pennsylvania / Allegheny County / Pittsburgh	Human		unknown	unknown	unknown	Original	Nasopharyngeal swab		B.1.1.159	GR	Illumina Nextseq	breseq v0.34; gdtools
EPI_ISL_1137224	hCoV-19/USA/PA-MGEL-01079/2020	2020-11-13	North America / USA / Pennsylvania / Allegheny County / Pittsburgh	Human		unknown	unknown	unknown	Original	Nasopharyngeal swab		B.1.2	GH	Illumina Nextseq	breseq v0.34; gdtools
EPI_ISL_1137225	hCoV-19/USA/PA-MGEL-00935/2020	2020-11-13	North America / USA / Pennsylvania / Allegheny County / Pittsburgh	Human		unknown	unknown	unknown	Original	Nasopharyngeal swab		B.1.234	G	Illumina Nextseq	breseq v0.34; gdtools
EPI_ISL_1137226	hCoV-19/USA/PA-MGEL-01044/2020	2020-11-11	North America / USA / Pennsylvania / Allegheny County / Pittsburgh	Human		unknown	unknown	unknown	Original	Nasopharyngeal swab		B.1.2	GH	Illumina Nextseq	breseq v0.34; gdtools
EPI_ISL_1137227	hCoV-19/USA/PA-MGEL-01023/2020	2020-11-11	North America / USA / Pennsylvania / Allegheny County / Pittsburgh	Human		unknown	unknown	unknown	Original	Nasopharyngeal swab		B.1.428	GH	Illumina Nextseq	breseq v0.34; gdtools
EPI_ISL_1137229	hCoV-19/USA/PA-MGEL-00943/2020	2020-11-11	North America / USA / Pennsylvania / Allegheny County / Pittsburgh	Human		unknown	unknown	unknown	Original	Nasopharyngeal swab		B.1.396	G	Illumina Nextseq	breseq v0.34; gdtools
EPI_ISL_1137230	hCoV-19/USA/PA-MGEL-00956/2020	2020-11-11	North America / USA / Pennsylvania / Allegheny County / Pittsburgh	Human		unknown	unknown	unknown	Original	Nasopharyngeal swab		B.1.361	GH	Illumina Nextseq	breseq v0.34; gdtools
EPI_ISL_1137231	hCoV-19/USA/PA-MGEL-00944/2020	2020-11-10	North America / USA / Pennsylvania / Allegheny County / Pittsburgh	Human		unknown	unknown	unknown	Original	Nasopharyngeal swab		B.1.361	GH	Illumina Nextseq	breseq v0.34; gdtools
EPI_ISL_1137232	hCoV-19/USA/PA-MGEL-01030/2020	2020-11-06	North America / USA / Pennsylvania / Allegheny County / Pittsburgh	Human		unknown	unknown	unknown	Original	Nasopharyngeal swab		B.1.234	G	Illumina Nextseq	breseq v0.34; gdtools
EPI_ISL_1137233	hCoV-19/USA/PA-MGEL-00874/2020	2020-11-06	North America / USA / Pennsylvania / Allegheny County / Pittsburgh	Human		unknown	unknown	unknown	Original	Nasopharyngeal swab		B.1.2	GH	Illumina Nextseq	breseq v0.34; gdtools
EPI_ISL_1137234	hCoV-19/USA/PA-MGEL-00950/2020	2020-11-06	North America / USA / Pennsylvania / Allegheny County / Pittsburgh	Human		unknown	unknown	unknown	Original	Nasopharyngeal swab		B.1.400	G	Illumina Nextseq	breseq v0.34; gdtools
EPI_ISL_1137235	hCoV-19/USA/PA-MGEL-00877/2020	2020-11-05	North America / USA / Pennsylvania / Allegheny County / Pittsburgh	Human		unknown	unknown	unknown	Original	Nasopharyngeal swab		B.1.2	GH	Illumina Nextseq	breseq v0.34; gdtools
EPI_ISL_1137236	hCoV-19/USA/PA-MGEL-00931/2020	2020-11-05	North America / USA / Pennsylvania / Allegheny County / Pittsburgh	Human		unknown	unknown	unknown	Original	Nasopharyngeal swab		B.1.361	GH	Illumina Nextseq	breseq v0.34; gdtools
EPI_ISL_1137237	hCoV-19/USA/PA-MGEL-00880/2020	2020-11-04	North America / USA / Pennsylvania / Allegheny County / Pittsburgh	Human		unknown	unknown	unknown	Original	Nasopharyngeal swab		B.1.139	G	Illumina Nextseq	breseq v0.34; gdtools
EPI_ISL_1137238	hCoV-19/USA/PA-MGEL-00888/2020	2020-11-04	North America / USA / Pennsylvania / Allegheny County / Pittsburgh	Human		unknown	unknown	unknown	Original	Nasopharyngeal swab		B.1.1.85	GR	Illumina Nextseq	breseq v0.34; gdtools
EPI_ISL_1137479	hCoV-19/Peru/LIM-INS-741/2020	2020-11-21	South America / Peru / Lima	Human		Female	30	unknown	Original	Nasopharyngeal swab		B.1.1.44	GR	Illumina Miseq	SPAdes
EPI_ISL_1137480	hCoV-19/Peru/LIM-INS-742/2020	2020-11-22	South America / Peru / Lima	Human		Male	27	unknown	Original	Nasopharyngeal swab		B.1.1.158	GR	Illumina Miseq	SPAdes	Gap of 6 nucleotides when compared to the reference sequence.	info
EPI_ISL_1137481	hCoV-19/Peru/LIM-INS-744/2020	2020-11-21	South America / Peru / Lima	Human		Female	1	unknown	Original	Nasopharyngeal swab		B.1.1	GR	Illumina Miseq	SPAdes
EPI_ISL_1137482	hCoV-19/Peru/LIM-INS-745/2020	2020-11-22	South America / Peru / Lima	Human		Male	83	unknown	Original	Nasopharyngeal swab		B.1.1.1	GR	Illumina Miseq	SPAdes
EPI_ISL_1137483	hCoV-19/Peru/LIM-INS-746/2020	2020-11-20	South America / Peru / Lima	Human		Male	86	unknown	Original	Nasopharyngeal swab		B.1.1.29	GR	Illumina Miseq	SPAdes
EPI_ISL_1137484	hCoV-19/Peru/CAL-INS-747/2020	2020-11-20	South America / Peru / Callao	Human		Male	63	unknown	Original	Nasopharyngeal swab		B.1.1.29	GR	Illumina Miseq	SPAdes
EPI_ISL_1137485	hCoV-19/Peru/LIM-INS-748/2020	2020-11-18	South America / Peru / Lima	Human		Female	40	unknown	Original	Nasopharyngeal swab		B.1.1.1	GR	Illumina Miseq	SPAdes
EPI_ISL_1137486	hCoV-19/Peru/LIM-INS-749/2020	2020-11-18	South America / Peru / Lima	Human		Female	19	unknown	Original	Nasopharyngeal swab		B.1.1.29	GR	Illumina Miseq	SPAdes
EPI_ISL_1137487	hCoV-19/Peru/LIM-INS-750/2020	2020-11-18	South America / Peru / Lima	Human		Male	45	unknown	Original	Nasopharyngeal swab		B.1.1.74	GR	Illumina Miseq	SPAdes	NSP3_E888stop results in 54.4% truncation of the protein sequence.	info
EPI_ISL_1137488	hCoV-19/Peru/LIM-INS-752/2020	2020-11-18	South America / Peru / Lima	Human		Male	87	unknown	Original	Nasopharyngeal swab		B.1.1.1	GR	Illumina Miseq	SPAdes
EPI_ISL_1137489	hCoV-19/Peru/LIM-INS-753/2020	2020-11-17	South America / Peru / Lima	Human		Female	32	unknown	Original	Nasopharyngeal swab		B.1.1.1	GR	Illumina Miseq	SPAdes
EPI_ISL_1137490	hCoV-19/Peru/LIM-INS-754/2020	2020-11-17	South America / Peru / Lima	Human		Male	47	unknown	Original	Nasopharyngeal swab		B.1.1.1	GR	Illumina Miseq	SPAdes
EPI_ISL_1137491	hCoV-19/Peru/LIM-INS-755/2020	2020-11-18	South America / Peru / Lima	Human		Male	21	unknown	Original	Nasopharyngeal swab		C.4	GR	Illumina Miseq	SPAdes
EPI_ISL_1138510	hCoV-19/USA/IL-IDPH-BOO-I-0001197/2020	2020-11-02	North America / USA / Illinois / Boone County	Human		unknown	unknown	unknown	Original			B.1.363	GH	Nanopore MinION	Medaka
EPI_ISL_1138600	hCoV-19/Germany/un-ChVir21545/2020	2020-11-04	Europe / Germany	Human		unknown	unknown	unknown	Original			B.1.1.39	GR	NextSeq	bowtie2
EPI_ISL_1138601	hCoV-19/Germany/un-ChVir21546/2020	2020-11-04	Europe / Germany	Human		unknown	unknown	unknown	Original			B.1.177	GV	NextSeq	bowtie2
EPI_ISL_1138602	hCoV-19/Germany/un-ChVir21547/2020	2020-11-12	Europe / Germany	Human		unknown	unknown	unknown	Original			B.1.367	GH	NextSeq	bowtie2
EPI_ISL_1138603	hCoV-19/Germany/un-ChVir21548/2020	2020-11-23	Europe / Germany	Human		unknown	unknown	unknown	Original			B.1.177	GV	NextSeq	bowtie2
EPI_ISL_1138604	hCoV-19/Germany/un-ChVir21549/2020	2020-11-27	Europe / Germany	Human		unknown	unknown	unknown	Original			B.1.1.192	GR	NextSeq	bowtie2
EPI_ISL_1138607	hCoV-19/Germany/un-ChVir21553/2020	2020-11-04	Europe / Germany	Human		unknown	unknown	unknown	Original			B.1.177	GV	NextSeq	bowtie2
EPI_ISL_1138608	hCoV-19/Germany/un-ChVir21554/2020	2020-11-04	Europe / Germany	Human		unknown	unknown	unknown	Original			B.1.177	GV	NextSeq	bowtie2
EPI_ISL_1138609	hCoV-19/Germany/un-ChVir21555/2020	2020-11-13	Europe / Germany	Human		unknown	unknown	unknown	Original			B.1.36	GH	NextSeq	bowtie2	Gap of 3 nucleotides when compared to the reference sequence.	info
EPI_ISL_1138610	hCoV-19/Germany/un-ChVir21556/2020	2020-11-23	Europe / Germany	Human		unknown	unknown	unknown	Original			B.1.160	GH	NextSeq	bowtie2
EPI_ISL_1138611	hCoV-19/Germany/un-ChVir21557/2020	2020-11-27	Europe / Germany	Human		unknown	unknown	unknown	Original			B.1.1.192	GR	NextSeq	bowtie2
EPI_ISL_1138615	hCoV-19/Germany/un-ChVir21562/2020	2020-11-04	Europe / Germany	Human		unknown	unknown	unknown	Original			B.1.177	GV	NextSeq	bowtie2
EPI_ISL_1138616	hCoV-19/Germany/un-ChVir21563/2020	2020-11-13	Europe / Germany	Human		unknown	unknown	unknown	Original			B.1.36	GH	NextSeq	bowtie2	Gap of 3 nucleotides when compared to the reference sequence.	info
EPI_ISL_1138617	hCoV-19/Germany/un-ChVir21564/2020	2020-11-23	Europe / Germany	Human		unknown	unknown	unknown	Original			B.1.177	GV	NextSeq	bowtie2
EPI_ISL_1138621	hCoV-19/Germany/un-ChVir21569/2020	2020-11-04	Europe / Germany	Human		unknown	unknown	unknown	Original			B.1.1.29	GR	NextSeq	bowtie2
EPI_ISL_1138622	hCoV-19/Germany/un-ChVir21570/2020	2020-11-04	Europe / Germany	Human		unknown	unknown	unknown	Original			B.1.177	GV	NextSeq	bowtie2
EPI_ISL_1138623	hCoV-19/Germany/un-ChVir21571/2020	2020-11-13	Europe / Germany	Human		unknown	unknown	unknown	Original			B.1.36	GH	NextSeq	bowtie2	Gap of 3 nucleotides when compared to the reference sequence.	info
EPI_ISL_1138624	hCoV-19/Germany/un-ChVir21572/2020	2020-11-24	Europe / Germany	Human		unknown	unknown	unknown	Original			B.1.480	GH	NextSeq	bowtie2
EPI_ISL_1138625	hCoV-19/Germany/un-ChVir21573/2020	2020-11-30	Europe / Germany	Human		unknown	unknown	unknown	Original			B.1.177	GV	NextSeq	bowtie2
EPI_ISL_1138628	hCoV-19/Germany/un-ChVir21577/2020	2020-11-04	Europe / Germany	Human		unknown	unknown	unknown	Original			B.1.218	G	NextSeq	bowtie2
EPI_ISL_1138629	hCoV-19/Germany/un-ChVir21578/2020	2020-11-09	Europe / Germany	Human		unknown	unknown	unknown	Original			B.1.177	GV	NextSeq	bowtie2
EPI_ISL_1138630	hCoV-19/Germany/un-ChVir21579/2020	2020-11-17	Europe / Germany	Human		unknown	unknown	unknown	Original			B.1.177	GV	NextSeq	bowtie2
EPI_ISL_1138632	hCoV-19/Germany/un-ChVir21581/2020	2020-11-30	Europe / Germany	Human		unknown	unknown	unknown	Original			B.1.177	GV	NextSeq	bowtie2
EPI_ISL_1138635	hCoV-19/Germany/un-ChVir21585/2020	2020-11-04	Europe / Germany	Human		unknown	unknown	unknown	Original			B.1.258	G	NextSeq	bowtie2	Gap of 6 nucleotides when compared to the reference sequence.	info
EPI_ISL_1138636	hCoV-19/Germany/un-ChVir21586/2020	2020-11-09	Europe / Germany	Human		unknown	unknown	unknown	Original			B.1.258	G	NextSeq	bowtie2	Gap of 9 nucleotides when compared to the reference sequence.	info
EPI_ISL_1138637	hCoV-19/Germany/un-ChVir21587/2020	2020-11-18	Europe / Germany	Human		unknown	unknown	unknown	Original			B.1.177	GV	NextSeq	bowtie2
EPI_ISL_1138638	hCoV-19/Germany/un-ChVir21588/2020	2020-11-24	Europe / Germany	Human		unknown	unknown	unknown	Original			B.1.1.70	GR	NextSeq	bowtie2	Gap of 6 nucleotides when compared to the reference sequence.	info
EPI_ISL_1138639	hCoV-19/Germany/un-ChVir21589/2020	2020-11-30	Europe / Germany	Human		unknown	unknown	unknown	Original			B.1.1.70	GR	NextSeq	bowtie2	Gap of 6 nucleotides when compared to the reference sequence.	info
EPI_ISL_1138640	hCoV-19/Germany/un-ChVir21590/2020	2020-11-16	Europe / Germany	Human		unknown	unknown	unknown	Original			B.1.177	GV	NextSeq	bowtie2
EPI_ISL_1138643	hCoV-19/Germany/un-ChVir21593/2020	2020-11-04	Europe / Germany	Human		unknown	unknown	unknown	Original			B.1.1.29	GR	NextSeq	bowtie2
EPI_ISL_1138644	hCoV-19/Germany/un-ChVir21594/2020	2020-11-09	Europe / Germany	Human		unknown	unknown	unknown	Original			B.1.1.159	GR	NextSeq	bowtie2
EPI_ISL_1138645	hCoV-19/Germany/un-ChVir21595/2020	2020-11-18	Europe / Germany	Human		unknown	unknown	unknown	Original			B.1.1.297	GR	NextSeq	bowtie2
EPI_ISL_1138646	hCoV-19/Germany/un-ChVir21596/2020	2020-11-24	Europe / Germany	Human		unknown	unknown	unknown	Original			B.1.1.70	GR	NextSeq	bowtie2	Gap of 6 nucleotides when compared to the reference sequence.	info
EPI_ISL_1138647	hCoV-19/Germany/un-ChVir21597/2020	2020-11-30	Europe / Germany	Human		unknown	unknown	unknown	Original			B.1.1.70	GR	NextSeq	bowtie2	Gap of 6 nucleotides when compared to the reference sequence.	info
EPI_ISL_1138651	hCoV-19/Germany/un-ChVir21601/2020	2020-11-09	Europe / Germany	Human		unknown	unknown	unknown	Original			B.1.160	GH	NextSeq	bowtie2
EPI_ISL_1138653	hCoV-19/Germany/un-ChVir21603/2020	2020-11-25	Europe / Germany	Human		unknown	unknown	unknown	Original			B.1.36	GH	NextSeq	bowtie2	Gap of 3 nucleotides when compared to the reference sequence.	info
EPI_ISL_1138654	hCoV-19/Germany/un-ChVir21604/2020	2020-11-30	Europe / Germany	Human		unknown	unknown	unknown	Original			B.1.160	GH	NextSeq	bowtie2
EPI_ISL_1138657	hCoV-19/Germany/un-ChVir21607/2020	2020-11-04	Europe / Germany	Human		unknown	unknown	unknown	Original			B.1.1.29	GR	NextSeq	bowtie2
EPI_ISL_1138658	hCoV-19/Germany/un-ChVir21608/2020	2020-11-09	Europe / Germany	Human		unknown	unknown	unknown	Original			B.1.177	GV	NextSeq	bowtie2
EPI_ISL_1138659	hCoV-19/Germany/un-ChVir21609/2020	2020-11-19	Europe / Germany	Human		unknown	unknown	unknown	Original			B.1.1.70	GR	NextSeq	bowtie2	Gap of 6 nucleotides when compared to the reference sequence.	info
EPI_ISL_1138660	hCoV-19/Germany/un-ChVir21610/2020	2020-11-25	Europe / Germany	Human		unknown	unknown	unknown	Original			B.1.177	GV	NextSeq	bowtie2	NS7b_E39stop results in 11.6% truncation of the protein sequence.	info
EPI_ISL_1138664	hCoV-19/Germany/un-ChVir21614/2020	2020-11-04	Europe / Germany	Human		unknown	unknown	unknown	Original			B.1.160	GH	NextSeq	bowtie2
EPI_ISL_1138665	hCoV-19/Germany/un-ChVir21615/2020	2020-11-09	Europe / Germany	Human		unknown	unknown	unknown	Original			B.1.177	GV	NextSeq	bowtie2
EPI_ISL_1138666	hCoV-19/Germany/un-ChVir21616/2020	2020-11-23	Europe / Germany	Human		unknown	unknown	unknown	Original			B.1.1.297	GR	NextSeq	bowtie2
EPI_ISL_1138667	hCoV-19/Germany/un-ChVir21617/2020	2020-11-25	Europe / Germany	Human		unknown	unknown	unknown	Original			B.1.9.5	G	NextSeq	bowtie2
EPI_ISL_1138671	hCoV-19/Germany/un-ChVir21621/2020	2020-11-04	Europe / Germany	Human		unknown	unknown	unknown	Original			B.1.1.70	GR	NextSeq	bowtie2	Gap of 6 nucleotides when compared to the reference sequence.	info
EPI_ISL_1138672	hCoV-19/Germany/un-ChVir21622/2020	2020-11-10	Europe / Germany	Human		unknown	unknown	unknown	Original			B.1.1.29	GR	NextSeq	bowtie2
EPI_ISL_1138673	hCoV-19/Germany/un-ChVir21623/2020	2020-11-23	Europe / Germany	Human		unknown	unknown	unknown	Original			B.1.160	GH	NextSeq	bowtie2
EPI_ISL_1138674	hCoV-19/Germany/un-ChVir21624/2020	2020-11-27	Europe / Germany	Human		unknown	unknown	unknown	Original			B.1.1.296	GR	NextSeq	bowtie2
EPI_ISL_1138677	hCoV-19/Germany/un-ChVir21627/2020	2020-11-04	Europe / Germany	Human		unknown	unknown	unknown	Original			B.1.160	GH	NextSeq	bowtie2
EPI_ISL_1138678	hCoV-19/Germany/un-ChVir21628/2020	2020-11-04	Europe / Germany	Human		unknown	unknown	unknown	Original			B.1.1.218	GR	NextSeq	bowtie2
EPI_ISL_1138679	hCoV-19/Germany/un-ChVir21629/2020	2020-11-10	Europe / Germany	Human		unknown	unknown	unknown	Original			B.1.1.29	GR	NextSeq	bowtie2
EPI_ISL_1138681	hCoV-19/Germany/un-ChVir21631/2020	2020-11-27	Europe / Germany	Human		unknown	unknown	unknown	Original			B.1.480	GH	NextSeq	bowtie2
EPI_ISL_1140353	hCoV-19/Germany/NW-RKI-I-010228/2020	2020-11-11	Europe / Germany / North Rhine-Westphalia	Human		unknown	unknown	unknown	Original			B.1.160	GH	Oxford Nanopore
EPI_ISL_1140355	hCoV-19/Germany/NW-RKI-I-010230/2020	2020-11-11	Europe / Germany / North Rhine-Westphalia	Human		unknown	unknown	unknown	Original			B.1.177	GV	Oxford Nanopore
EPI_ISL_1140356	hCoV-19/Germany/NW-RKI-I-010231/2020	2020-11-11	Europe / Germany / North Rhine-Westphalia	Human		unknown	unknown	unknown	Original			B.1.1	GR	Oxford Nanopore
EPI_ISL_1140359	hCoV-19/Germany/NW-RKI-I-010234/2020	2020-11-11	Europe / Germany / North Rhine-Westphalia	Human		unknown	unknown	unknown	Original			B.1.1.288	GR	Oxford Nanopore
EPI_ISL_1140362	hCoV-19/Germany/NW-RKI-I-010237/2020	2020-11-13	Europe / Germany / North Rhine-Westphalia	Human		unknown	unknown	unknown	Original			B.1.160	GH	Oxford Nanopore
EPI_ISL_1140364	hCoV-19/Germany/NW-RKI-I-010239/2020	2020-11-13	Europe / Germany / North Rhine-Westphalia	Human		unknown	unknown	unknown	Original			B.1.177	GV	Oxford Nanopore		Gap of 3 nucleotides when compared to the reference sequence.	info
EPI_ISL_1140365	hCoV-19/Germany/NW-RKI-I-010240/2020	2020-11-13	Europe / Germany / North Rhine-Westphalia	Human		unknown	unknown	unknown	Original			B.1.88	G	Oxford Nanopore
EPI_ISL_1141013	hCoV-19/Germany/BY-RKI-I-010885/2020	2020-11-26	Europe / Germany / Bavaria	Human		unknown	unknown	unknown	Original			B	L	Illumina
EPI_ISL_1141015	hCoV-19/Germany/BY-RKI-I-010887/2020	2020-11-26	Europe / Germany / Bavaria	Human		unknown	unknown	unknown	Original			B	L	Illumina
EPI_ISL_1143958	hCoV-19/Germany/BY-RKI-I-013822/2020	2020-11-21	Europe / Germany / Bavaria	Human		unknown	unknown	unknown	Original			B.1.258	G	ILLUMINA		Gap of 6 nucleotides when compared to the reference sequence.	info
EPI_ISL_1144913	hCoV-19/Germany/NI-RKI-I-014775/2020	2020-11-24	Europe / Germany / Lower Saxony	Human		unknown	unknown	unknown	Original			B.1.177	GV	ILLUMINA
EPI_ISL_1144914	hCoV-19/Germany/NI-RKI-I-014776/2020	2020-11-23	Europe / Germany / Lower Saxony	Human		unknown	unknown	unknown	Original			B.1.177	GV	ILLUMINA
EPI_ISL_1144915	hCoV-19/Germany/NI-RKI-I-014777/2020	2020-11-24	Europe / Germany / Lower Saxony	Human		unknown	unknown	unknown	Original			B.1.177	GV	ILLUMINA
EPI_ISL_1144917	hCoV-19/Germany/NI-RKI-I-014779/2020	2020-11-25	Europe / Germany / Lower Saxony	Human		unknown	unknown	unknown	Original			B.1.177	GV	ILLUMINA
EPI_ISL_1144918	hCoV-19/Germany/NI-RKI-I-014780/2020	2020-11-26	Europe / Germany / Lower Saxony	Human		unknown	unknown	unknown	Original			B.1.177	GV	ILLUMINA
EPI_ISL_1144919	hCoV-19/Germany/NI-RKI-I-014781/2020	2020-11-25	Europe / Germany / Lower Saxony	Human		unknown	unknown	unknown	Original			B.1.177	GV	ILLUMINA
EPI_ISL_1144920	hCoV-19/Germany/NI-RKI-I-014782/2020	2020-11-28	Europe / Germany / Lower Saxony	Human		unknown	unknown	unknown	Original			B.1.177	GV	Illumina
EPI_ISL_1144921	hCoV-19/Germany/NI-RKI-I-014783/2020	2020-11-29	Europe / Germany / Lower Saxony	Human		unknown	unknown	unknown	Original			B.1.1.15	GR	ILLUMINA		Gap of 26 nucleotides when compared to the reference sequence.	info
EPI_ISL_1144922	hCoV-19/Germany/NI-RKI-I-014784/2020	2020-11-30	Europe / Germany / Lower Saxony	Human		unknown	unknown	unknown	Original			B.1.177	GV	ILLUMINA
EPI_ISL_1159071	hCoV-19/Hong Kong/HKPU-05592/2020	2020-11-22	Asia / Hong Kong	Human		Female	51	Discharged	Original			B.1.36.27	GH	Nanopore MinION	ARTIC-nCoV-bioinformaticsSOP-v1.1.0
EPI_ISL_1159072	hCoV-19/Hong Kong/HKPU-05593/2020	2020-11-22	Asia / Hong Kong	Human		Female	70	Discharged	Original			B.1.36.27	GH	Nanopore MinION	ARTIC-nCoV-bioinformaticsSOP-v1.1.0
EPI_ISL_1159073	hCoV-19/Hong Kong/HKPU-05599/2020	2020-11-22	Asia / Hong Kong	Human		Female	63	Discharged	Original			B.1.36.27	GH	Nanopore MinION	ARTIC-nCoV-bioinformaticsSOP-v1.1.0
EPI_ISL_1159074	hCoV-19/Hong Kong/HKPU-05688/2020	2020-11-23	Asia / Hong Kong	Human		Male	65	Discharged	Original			B.1.36.27	GH	Nanopore MinION	ARTIC-nCoV-bioinformaticsSOP-v1.1.0
EPI_ISL_1159075	hCoV-19/Hong Kong/HKPU-05709/2020	2020-11-24	Asia / Hong Kong	Human		Female	50	Discharged	Original			B.1.36	GH	Nanopore MinION	ARTIC-nCoV-bioinformaticsSOP-v1.1.0
EPI_ISL_1159076	hCoV-19/Hong Kong/HKPU-05723/2020	2020-11-24	Asia / Hong Kong	Human		Female	69	Discharged	Original			B.1.36.27	GH	Nanopore MinION	ARTIC-nCoV-bioinformaticsSOP-v1.1.0
EPI_ISL_1159077	hCoV-19/Hong Kong/HKPU-05734/2020	2020-11-24	Asia / Hong Kong	Human		Female	49	Discharged	Original			B.1.36.27	GH	Nanopore MinION	ARTIC-nCoV-bioinformaticsSOP-v1.1.0
EPI_ISL_1159078	hCoV-19/Hong Kong/HKPU-05735/2020	2020-11-24	Asia / Hong Kong	Human		Male	67	Critical	Original			B.1.36.27	GH	Nanopore MinION	ARTIC-nCoV-bioinformaticsSOP-v1.1.0
EPI_ISL_1159079	hCoV-19/Hong Kong/HKPU-05740/2020	2020-11-24	Asia / Hong Kong	Human		Male	70	Discharged	Original			B.1.36.27	GH	Nanopore MinION	ARTIC-nCoV-bioinformaticsSOP-v1.1.0
EPI_ISL_1159080	hCoV-19/Hong Kong/HKPU-05749/2020	2020-11-24	Asia / Hong Kong	Human		Female	61	Discharged	Original			B.1.36.27	GH	Nanopore MinION	ARTIC-nCoV-bioinformaticsSOP-v1.1.0
EPI_ISL_1159083	hCoV-19/Hong Kong/HKPU-05807/2020	2020-11-25	Asia / Hong Kong	Human		Male	75	Discharged	Original			B.1.36.27	GH	Nanopore MinION	ARTIC-nCoV-bioinformaticsSOP-v1.1.0
EPI_ISL_1159085	hCoV-19/Hong Kong/HKPU-05911/2020	2020-11-26	Asia / Hong Kong	Human		Male	56	Discharged	Original			B.1.36.27	GH	Nanopore MinION	ARTIC-nCoV-bioinformaticsSOP-v1.1.0
EPI_ISL_1159087	hCoV-19/Hong Kong/HKPU-05932/2020	2020-11-26	Asia / Hong Kong	Human		Female	64	Discharged	Original			B.1.36.27	GH	Nanopore MinION	ARTIC-nCoV-bioinformaticsSOP-v1.1.0
EPI_ISL_1159089	hCoV-19/Hong Kong/HKPU-05971/2020	2020-11-27	Asia / Hong Kong	Human		Female	2	Discharged	Original			B.1.36.27	GH	Nanopore MinION	ARTIC-nCoV-bioinformaticsSOP-v1.1.0
EPI_ISL_1159091	hCoV-19/Hong Kong/HKPU-05988/2020	2020-11-27	Asia / Hong Kong	Human		Male	70	Deceased	Original			B.1.36.27	GH	Nanopore MinION	ARTIC-nCoV-bioinformaticsSOP-v1.1.0
EPI_ISL_1159092	hCoV-19/Hong Kong/HKPU-05990/2020	2020-11-27	Asia / Hong Kong	Human		Male	68	Serious	Original			B.1.36.27	GH	Nanopore MinION	ARTIC-nCoV-bioinformaticsSOP-v1.1.0
EPI_ISL_1159096	hCoV-19/Hong Kong/HKPU-06045/2020	2020-11-28	Asia / Hong Kong	Human		Male	77	Discharged	Original			B.1.36.27	GH	Nanopore MinION	ARTIC-nCoV-bioinformaticsSOP-v1.1.0
EPI_ISL_1159102	hCoV-19/Hong Kong/HKPU-06221/2020	2020-11-29	Asia / Hong Kong	Human		Male	62	Discharged	Original			B.1.36.27	GH	Nanopore MinION	ARTIC-nCoV-bioinformaticsSOP-v1.1.0
EPI_ISL_1159175	hCoV-19/Spain/CT-ISCIII-210896/2020	2020-11-04	Europe / Spain / Cataluna	Human		Male	44	unknown	Original	Nasopharyngeal swab		B.1.1.269	GR	Illumina/NextSeq	nf-core/viralrecon
EPI_ISL_1159386	hCoV-19/Indonesia/JI-ITD-30338NTv/2020	2020-11-03	Asia / Indonesia / East Java / Sidoarjo	Human		Female	27	Hospitalized	Vero P1	Nasopharyngeal and oropharyngeal swab		B.1.36.19	GH	Illumina MiSeq	CLC Genomics Workbench 20 and Genetyx Ver. 14
EPI_ISL_1159387	hCoV-19/Indonesia/JI-ITD-30604Nv/2020	2020-11-09	Asia / Indonesia / East Java / Surabaya	Human		Female	39	Hospitalized	Vero P1	Nasopharyngeal swab		B.1.470	GH	Illumina MiSeq	CLC Genomics Workbench 20 and Genetyx Ver. 14
EPI_ISL_1159388	hCoV-19/Indonesia/JI-ITD-30833Nv/2020	2020-11-13	Asia / Indonesia / East Java / Surabaya	Human		Female	48	Hospitalized	Vero P1	Nasopharyngeal swab		B.1.470	GH	Illumina MiSeq	CLC Genomics Workbench 20 and Genetyx Ver. 14
EPI_ISL_1159389	hCoV-19/Indonesia/JI-ITD-31235NTv/2020	2020-11-20	Asia / Indonesia / East Java / Surabaya	Human		Male	42	Hospitalized	Vero P1	Nasopharyngeal and oropharyngeal swab		B.1.36.19	GH	Illumina MiSeq	CLC Genomics Workbench 20 and Genetyx Ver. 14
EPI_ISL_1160138	hCoV-19/Germany/NW-HHU-1033/2020	2020-11-08	Europe / Germany / North Rhine-Westphalia	Human	Dusseldorf Health department	unknown	unknown	unknown	Original	Oropharyngeal swab		B.1.160	GH	Nanopore MinION	ARTIC Protocol
EPI_ISL_1160148	hCoV-19/Germany/NW-HHU-1045/2020	2020-11-09	Europe / Germany / North Rhine-Westphalia	Human	Dusseldorf Health department	unknown	unknown	unknown	Original	Oropharyngeal swab		B.1.1.288	GR	Nanopore MinION	ARTIC Protocol
EPI_ISL_1160152	hCoV-19/Germany/NW-HHU-1048/2020	2020-11-09	Europe / Germany / North Rhine-Westphalia	Human	Dusseldorf Health department	unknown	unknown	unknown	Original	Oropharyngeal swab		B.1.258	G	Nanopore MinION	ARTIC Protocol
EPI_ISL_1160155	hCoV-19/Germany/NW-HHU-1049/2020	2020-11-09	Europe / Germany / North Rhine-Westphalia	Human	Dusseldorf Health department	unknown	unknown	unknown	Original	Oropharyngeal swab		B.1.1.297	GR	Nanopore MinION	ARTIC Protocol
EPI_ISL_1160157	hCoV-19/Germany/NW-HHU-1050/2020	2020-11-09	Europe / Germany / North Rhine-Westphalia	Human	Dusseldorf Health department	unknown	unknown	unknown	Original	Oropharyngeal swab		B.1.1.297	GR	Nanopore MinION	ARTIC Protocol
EPI_ISL_1160161	hCoV-19/Germany/NW-HHU-1055/2020	2020-11-10	Europe / Germany / North Rhine-Westphalia	Human	Dusseldorf Health department	unknown	unknown	unknown	Original	Oropharyngeal swab		B.1.160	GH	Nanopore MinION	ARTIC Protocol
EPI_ISL_1160174	hCoV-19/Germany/NW-HHU-1066/2020	2020-11-12	Europe / Germany / North Rhine-Westphalia	Human	Dusseldorf Health department	unknown	unknown	unknown	Original	Oropharyngeal swab		B.1.221	G	Nanopore MinION	ARTIC Protocol
EPI_ISL_1160182	hCoV-19/Germany/NW-HHU-1077/2020	2020-11-14	Europe / Germany / North Rhine-Westphalia	Human	Dusseldorf Health department	unknown	unknown	unknown	Original	Oropharyngeal swab		B.1.221	G	Nanopore MinION	ARTIC Protocol
EPI_ISL_1163832	hCoV-19/Italy/VEN-D2_3_B_1_177_4/2020	2020-11-20	Europe / Italy / Veneto / Padova	Human		Male	unknown	unknown	Original			B.1.177	GV	Illumina Miseq
EPI_ISL_1163833	hCoV-19/Italy/VEN-D2_4_B_1_160/2020	2020-11-20	Europe / Italy / Veneto / Padova / Selvazzano Dentro	Human		Female	unknown	unknown	Original			B.1.160	GH	Illumina Miseq		Gap of 9 nucleotides when compared to the reference sequence.	info
EPI_ISL_1163834	hCoV-19/Italy/VEN-D2_1_B_1_160/2020	2020-11-20	Europe / Italy / Veneto / Padova / Ponte San NicolÃ²	Human		Male	unknown	unknown	Original			B.1.160	GH	Illumina Miseq
EPI_ISL_1163838	hCoV-19/Italy/VEN-D3_PD80/2020	2020-11-04	Europe / Italy / Veneto / Padova	Human		unknown	unknown	unknown	Original			B.1.177	GV	Illumina Miseq
EPI_ISL_1163842	hCoV-19/Italy/VEN-C1_3_B_1_1_1/2020	2020-11-20	Europe / Italy / Veneto	Human		unknown	unknown	unknown	Original			B.1.1.1	GR	Illumina Miseq		Gap of 6 nucleotides when compared to the reference sequence.	info
EPI_ISL_1163843	hCoV-19/Italy/VEN-C1_1_B_1_177/2020	2020-11-20	Europe / Italy / Veneto	Human		unknown	unknown	unknown	Original			B.1.177	GV	Illumina Miseq
EPI_ISL_1163845	hCoV-19/Italy/VEN-C1_2_B_1_1_1/2020	2020-11-20	Europe / Italy / Veneto	Human		unknown	unknown	unknown	Original			B.1.1.1	GR	Illumina Miseq
EPI_ISL_1164686	hCoV-19/Cyprus/Cy086241/2020	2020-11-02	Europe / Cyprus	Human		unknown	unknown	unknown	original			B.1.258	G	Illumina MiSeq		Gap of 6 nucleotides when compared to the reference sequence.	info
EPI_ISL_1164687	hCoV-19/Cyprus/Cy088099/2020	2020-11-04	Europe / Cyprus	Human		unknown	unknown	unknown	original			B.1.258	G	Illumina MiSeq		Gap of 6 nucleotides when compared to the reference sequence.	info
EPI_ISL_1164688	hCoV-19/Cyprus/Cy089235/2020	2020-11-05	Europe / Cyprus	Human		unknown	unknown	unknown	original			B.1.177	GV	Illumina MiSeq
EPI_ISL_1164689	hCoV-19/Cyprus/Cy089926/2020	2020-11-06	Europe / Cyprus	Human		unknown	unknown	unknown	original			B.1.258	G	Illumina MiSeq		Gap of 6 nucleotides when compared to the reference sequence.	info
EPI_ISL_1164691	hCoV-19/Cyprus/Cy092137/2020	2020-11-08	Europe / Cyprus	Human		unknown	unknown	unknown	original			B.1.258	G	Illumina MiSeq		Gap of 6 nucleotides when compared to the reference sequence.	info
EPI_ISL_1164692	hCoV-19/Cyprus/Cy093529/2020	2020-11-10	Europe / Cyprus	Human		unknown	unknown	unknown	original			B.1.258	G	Illumina MiSeq		Gap of 6 nucleotides when compared to the reference sequence.	info
EPI_ISL_1164693	hCoV-19/Cyprus/Cy095281/2020	2020-11-11	Europe / Cyprus	Human		unknown	unknown	unknown	original			B.1.177	GV	Illumina MiSeq
EPI_ISL_1164694	hCoV-19/Cyprus/Cy095857/2020	2020-11-12	Europe / Cyprus	Human		unknown	unknown	unknown	original			B.1.258	G	Illumina MiSeq		Gap of 6 nucleotides when compared to the reference sequence.	info
EPI_ISL_1164695	hCoV-19/Cyprus/Cy097095/2020	2020-11-13	Europe / Cyprus	Human		unknown	unknown	unknown	original			B.1.258	G	Illumina MiSeq		Gap of 6 nucleotides when compared to the reference sequence.	info
EPI_ISL_1164696	hCoV-19/Cyprus/Cy098242/2020	2020-11-14	Europe / Cyprus	Human		unknown	unknown	unknown	original			B.1.258	G	Illumina MiSeq		Gap of 6 nucleotides when compared to the reference sequence.	info
EPI_ISL_1164697	hCoV-19/Cyprus/Cy098516/2020	2020-11-15	Europe / Cyprus	Human		unknown	unknown	unknown	original			B.1.258	G	Illumina MiSeq		Gap of 6 nucleotides when compared to the reference sequence.	info
EPI_ISL_1164698	hCoV-19/Cyprus/Cy099835/2020	2020-11-16	Europe / Cyprus	Human		unknown	unknown	unknown	original			B.1.258	G	Illumina MiSeq		Gap of 6 nucleotides when compared to the reference sequence.	info
EPI_ISL_1164931	hCoV-19/USA/OH-ODH-SC149729/2020	2020-11-03	North America / USA / Ohio	Human		unknown	unknown	unknown	Original			B.1.1.250	GR	Illumina MiSeq
EPI_ISL_1165079	hCoV-19/Egypt/MASRI-C4-033/2020	2020-11-25	Africa / Egypt / Cairo	Human	Medany Hospital	Female	74	unknown	Original	Oropharyngeal swab		B.1.1.1	GR	Ion Torrent		Gap of 7 nucleotide(s) found at refpos 4155 (frameshift confirmed by the submitter). Gap of 7 nucleotide(s) found at refpos 23638 (frameshift confirmed by the submitter). Gap of 49 nucleotide(s) found at refpos 26350 (frameshift confirmed by the submitter). NSP3_D471stop results in 75.8% truncation of the protein sequence. Gap of 63 nucleotides when compared to the reference sequence. E without B…	info
EPI_ISL_1165080	hCoV-19/Egypt/MASRI-C4-037/2020	2020-11-17	Africa / Egypt / Cairo	Human	Medany Hospital	Female	53	unknown	Original	Oropharyngeal swab		B.1.1.1	GR	Ion Torrent		Gap of 26 nucleotide(s) found at refpos 26359 (frameshift confirmed by the submitter). E without BLAST coverage.	info
EPI_ISL_1165442	hCoV-19/USA/OH-ODH-SC149745/2020	2020-11-03	North America / USA / Ohio	Human		unknown	unknown	unknown	Original			B.1.369	GH	Illumina Miseq
EPI_ISL_1167040	hCoV-19/Croatia/IGA-20-87111/2020	2020-11-13	Europe / Croatia / Zagreb	Human		Female	26	unknown	Original	Nasopharyngeal swab		B.1.2	G	Illumina NovaSeq 6000		NS8_G8stop results in 94.2% truncation of the protein sequence.	info
EPI_ISL_1167041	hCoV-19/Croatia/IGA-21-87107/2020	2020-11-13	Europe / Croatia / Zagreb	Human		Male	55	unknown	Original	Nasopharyngeal swab		B.1.1.247	GR	Illumina NovaSeq 6000
EPI_ISL_1167042	hCoV-19/Croatia/IGA-22-87108/2020	2020-11-13	Europe / Croatia / Zagreb	Human		Female	43	unknown	Original	Nasopharyngeal swab		B.1.221	G	Illumina NovaSeq 6000		Gap of 1 nucleotides when compared to the reference sequence.	info
EPI_ISL_1167043	hCoV-19/Croatia/IGA-23-86470/2020	2020-11-12	Europe / Croatia / Zagreb	Human		Female	59	unknown	Original	Nasopharyngeal swab		B.1	G	Illumina NovaSeq 6000
EPI_ISL_1167044	hCoV-19/Croatia/IGA-24-86491/2020	2020-11-12	Europe / Croatia / Zagreb	Human		Female	20	unknown	Original	Nasopharyngeal swab		B.1.258	G	Illumina NovaSeq 6000		Gap of 6 nucleotides when compared to the reference sequence.	info
EPI_ISL_1167045	hCoV-19/Croatia/IGA-25-87261/2020	2020-11-13	Europe / Croatia / Zagreb	Human		Female	19	unknown	Original	Nasopharyngeal swab		B.1.258	G	Illumina NovaSeq 6000		Gap of 6 nucleotides when compared to the reference sequence.	info
EPI_ISL_1167050	hCoV-19/Croatia/IGA-30-86940/2020	2020-11-13	Europe / Croatia / Zagreb	Human		Male	46	unknown	Original	Nasopharyngeal swab		B.1.258	G	Illumina NovaSeq 6004		Gap of 6 nucleotides when compared to the reference sequence.	info
EPI_ISL_1167052	hCoV-19/Croatia/IGA-32-86937/2020	2020-11-13	Europe / Croatia / Zagreb	Human		Male	36	unknown	Original	Nasopharyngeal swab		B.1.258	G	Illumina NovaSeq 6006		Gap of 6 nucleotides when compared to the reference sequence.	info
EPI_ISL_1167056	hCoV-19/Croatia/IGA-36-86949/2020	2020-11-13	Europe / Croatia / Zagreb	Human		Female	29	unknown	Original	Nasopharyngeal swab		B.1.1.282	GR	Illumina NovaSeq 6010
EPI_ISL_1167058	hCoV-19/Croatia/IGA-38-86485/2020	2020-11-12	Europe / Croatia / Zagreb	Human		Male	62	unknown	Original	Nasopharyngeal swab		B.1.177	GV	Illumina NovaSeq 6012
EPI_ISL_1167061	hCoV-19/Croatia/IGA-43-86495/2020	2020-11-12	Europe / Croatia / Zagreb	Human		Male	35	unknown	Original	Nasopharyngeal swab		B.1.221	G	Illumina NovaSeq 6017
EPI_ISL_1167063	hCoV-19/Croatia/IGA-45-86486/2020	2020-11-12	Europe / Croatia / Zagreb	Human		Male	53	unknown	Original	Nasopharyngeal swab		B.1.1.190	GR	Illumina NovaSeq 6019
EPI_ISL_1167709	hCoV-19/Chile/RM-230441/2020	2020-11-13	South America / Chile / Region Metropolitana de Santiago / La Granja	Human		Male	13	unknown	Original	Nasopharyngeal swab		B.1.1.1	GR	Illumina Miseq	IRMA v0.9.3
EPI_ISL_1167710	hCoV-19/Chile/RM-230491/2020	2020-11-15	South America / Chile / Region Metropolitana de Santiago / La Florida	Human		Male	29	unknown	Original	Nasopharyngeal swab		B.1.1.1	GR	Illumina Miseq	IRMA v0.9.3
EPI_ISL_1168662	hCoV-19/USA/PR-CDC-S137/2020	2020-11-19	North America / USA / Puerto Rico	Human		unknown	unknown	Symptomatic	Original	Nasopharyngeal swab		B.1.1.247	GR	Illumina MiSeq	Genome Detective Virus Tool
EPI_ISL_1168663	hCoV-19/USA/PR-CDC-S138/2020	2020-11-13	North America / USA / Puerto Rico	Human		unknown	unknown	Symptomatic	Original	Nasopharyngeal swab		B.1.2	GH	Illumina MiSeq	Genome Detective Virus Tool
EPI_ISL_1168669	hCoV-19/USA/PR-CDC-S144/2020	2020-11-12	North America / USA / Puerto Rico	Human		unknown	unknown	Symptomatic	Original	Nasopharyngeal swab		B.1.2	GH	Illumina MiSeq	Genome Detective Virus Tool
EPI_ISL_1168679	hCoV-19/USA/PR-CDC-S154/2020	2020-11-07	North America / USA / Puerto Rico	Human		unknown	unknown	Symptomatic	Original	Nasopharyngeal swab		B.1.2	GH	Illumina MiSeq	Genome Detective Virus Tool
EPI_ISL_1169534	hCoV-19/USA/MP-CDC-2-3831104/2020	2020-11-05	Oceania / USA / Northern Mariana Islands	Human		unknown	39	unknown	Original	Nasopharyngeal aspirate		B.1.1.207	GR	Illumina	IRMA v0.9.5-beta
EPI_ISL_1169535	hCoV-19/USA/MP-CDC-2-3831116/2020	2020-11-09	Oceania / USA / Northern Mariana Islands	Human		unknown	19	unknown	Original	Nasopharyngeal aspirate		B.1.243	G	Illumina	IRMA v0.9.5-beta
EPI_ISL_1169537	hCoV-19/USA/MP-CDC-2-3831041/2020	2020-11-14	Oceania / USA / Northern Mariana Islands	Human		unknown	20	unknown	Original	Nasopharyngeal aspirate		B.1.243	GV	Illumina	IRMA v0.9.5-beta
EPI_ISL_1169697	hCoV-19/USA/CO-CDPHE-2011016419/2020	2020-11-01	North America / USA / Colorado	Human		unknown	unknown	unknown	Original			B.1.2	GH	Illumina MiSeq
EPI_ISL_1169699	hCoV-19/USA/CO-CDPHE-2011016836/2020	2020-11-01	North America / USA / Colorado	Human		unknown	unknown	unknown	Original			B.1.2	GH	Illumina MiSeq
EPI_ISL_1169701	hCoV-19/USA/CO-CDPHE-2011120805/2020	2020-11-12	North America / USA / Colorado	Human		unknown	unknown	unknown	Original			B.1.1.222	GR	Illumina MiSeq
EPI_ISL_1169702	hCoV-19/USA/CO-CDPHE-2011120894/2020	2020-11-12	North America / USA / Colorado	Human		unknown	unknown	unknown	Original			B.1.1.222	GR	Illumina MiSeq
EPI_ISL_1169703	hCoV-19/USA/CO-CDPHE-2011121157/2020	2020-11-12	North America / USA / Colorado	Human		unknown	unknown	unknown	Original			B.1.1.222	GR	Illumina MiSeq
EPI_ISL_1169704	hCoV-19/USA/CO-CDPHE-2011121364/2020	2020-11-12	North America / USA / Colorado	Human		unknown	unknown	unknown	Original			B.1.1.222	GR	Illumina MiSeq
EPI_ISL_1169705	hCoV-19/USA/CO-CDPHE-2011139112/2020	2020-11-13	North America / USA / Colorado	Human		unknown	unknown	unknown	Original			B.1.1.222	GR	Illumina MiSeq
EPI_ISL_1169706	hCoV-19/USA/CO-CDPHE-2011139143/2020	2020-11-13	North America / USA / Colorado	Human		unknown	unknown	unknown	Original			B.1.1.222	GR	Illumina MiSeq
EPI_ISL_1169707	hCoV-19/USA/CO-CDPHE-2011139197/2020	2020-11-13	North America / USA / Colorado	Human		unknown	unknown	unknown	Original			B.1.1.222	GR	Illumina MiSeq
EPI_ISL_1169710	hCoV-19/USA/CO-CDPHE-2011139401/2020	2020-11-13	North America / USA / Colorado	Human		unknown	unknown	unknown	Original			B.1.1.222	GR	Illumina MiSeq
EPI_ISL_1169711	hCoV-19/USA/CO-CDPHE-2011140304/2020	2020-11-13	North America / USA / Colorado	Human		unknown	unknown	unknown	Original			B.1.1.222	GR	Illumina MiSeq
EPI_ISL_1169714	hCoV-19/USA/CO-CDPHE-2100007078/2020	2020-11-23	North America / USA / Colorado	Human		unknown	unknown	unknown	Original			B.1.1.222	GR	Illumina MiSeq
EPI_ISL_1169715	hCoV-19/USA/CO-CDPHE-2100007082/2020	2020-11-23	North America / USA / Colorado	Human		unknown	unknown	unknown	Original			B.1.1.222	GR	Illumina MiSeq
EPI_ISL_626124	hCoV-19/Denmark/DCGC-8894/2020	2020-11-02	Europe / Denmark / Hovedstaden	Human		unknown	unknown	unknown	Original			B.1.177	GV	Nanopore MinION
EPI_ISL_626127	hCoV-19/Denmark/DCGC-8915/2020	2020-11-02	Europe / Denmark / Sjaelland	Human		unknown	unknown	unknown	Original			B.1.177	GV	Nanopore MinION
EPI_ISL_626129	hCoV-19/Denmark/DCGC-8937/2020	2020-11-02	Europe / Denmark / Hovedstaden	Human		unknown	unknown	unknown	Original			B.1.177	GV	Nanopore MinION
EPI_ISL_626132	hCoV-19/Denmark/DCGC-8895/2020	2020-11-02	Europe / Denmark / Hovedstaden	Human		unknown	unknown	unknown	Original			B.1.177	GV	Nanopore MinION
EPI_ISL_626133	hCoV-19/Denmark/DCGC-8916/2020	2020-11-02	Europe / Denmark / Sjaelland	Human		unknown	unknown	unknown	Original			B.1.160	GH	Nanopore MinION
EPI_ISL_626134	hCoV-19/Denmark/DCGC-8931/2020	2020-11-02	Europe / Denmark / Hovedstaden	Human		unknown	unknown	unknown	Original			B.1.160	GH	Nanopore MinION
EPI_ISL_626138	hCoV-19/Denmark/DCGC-8939/2020	2020-11-02	Europe / Denmark / Hovedstaden	Human		unknown	unknown	unknown	Original			B.1.177	GV	Nanopore MinION
EPI_ISL_626139	hCoV-19/Denmark/DCGC-8876/2020	2020-11-02	Europe / Denmark / Sjaelland	Human		unknown	unknown	unknown	Original			B.1.177	GV	Nanopore MinION
EPI_ISL_626146	hCoV-19/Denmark/DCGC-8877/2020	2020-11-02	Europe / Denmark / Midtjylland	Human		unknown	unknown	unknown	Original			B.1	GH	Nanopore MinION
EPI_ISL_626148	hCoV-19/Denmark/DCGC-8891/2020	2020-11-02	Europe / Denmark / Hovedstaden	Human		unknown	unknown	unknown	Original			B.1.1	GR	Nanopore MinION
EPI_ISL_626149	hCoV-19/Denmark/DCGC-8897/2020	2020-11-02	Europe / Denmark / Syddanmark	Human		unknown	unknown	unknown	Original			B.1.5	G	Nanopore MinION
EPI_ISL_626157	hCoV-19/Denmark/DCGC-8878/2020	2020-11-02	Europe / Denmark / Midtjylland	Human		unknown	unknown	unknown	Original			B.1.1.55	GR	Nanopore MinION
EPI_ISL_626164	hCoV-19/Denmark/DCGC-8893/2020	2020-11-02	Europe / Denmark / Hovedstaden	Human		unknown	unknown	unknown	Original			B.1.1	GR	Nanopore MinION
EPI_ISL_651107	hCoV-19/England/NOTT-11C6D1/2020	2020-11-16	Europe / United Kingdom / England	Human		unknown	unknown	unknown	Original			B.1.177	GV	Oxford Nanopore		NS7a_Q62stop results in 49.6% truncation of the protein sequence.	info
EPI_ISL_652401	hCoV-19/England/NOTT-11C2FB/2020	2020-11-16	Europe / United Kingdom / England	Human		unknown	unknown	unknown	Original			B.1.177	GV	Oxford Nanopore
EPI_ISL_652402	hCoV-19/England/NOTT-11C334/2020	2020-11-16	Europe / United Kingdom / England	Human		unknown	unknown	unknown	Original			B.1.177	GV	Oxford Nanopore
EPI_ISL_652403	hCoV-19/England/NOTT-11C361/2020	2020-11-16	Europe / United Kingdom / England	Human		unknown	unknown	unknown	Original			B.1.177	GV	Oxford Nanopore
EPI_ISL_652404	hCoV-19/England/NOTT-11C370/2020	2020-11-16	Europe / United Kingdom / England	Human		unknown	unknown	unknown	Original			B.1.177	GV	Oxford Nanopore
EPI_ISL_652405	hCoV-19/England/NOTT-11C38F/2020	2020-11-16	Europe / United Kingdom / England	Human		unknown	unknown	unknown	Original			B.1.177	GV	Oxford Nanopore
EPI_ISL_652408	hCoV-19/England/NOTT-11C71A/2020	2020-11-17	Europe / United Kingdom / England	Human		unknown	unknown	unknown	Original			B.1.177	GV	Oxford Nanopore
EPI_ISL_652409	hCoV-19/England/NOTT-11C747/2020	2020-11-17	Europe / United Kingdom / England	Human		unknown	unknown	unknown	Original			B.1.177	GV	Oxford Nanopore
EPI_ISL_652410	hCoV-19/England/NOTT-11C7B0/2020	2020-11-17	Europe / United Kingdom / England	Human		unknown	unknown	unknown	Original			B.1.177	GV	Oxford Nanopore
EPI_ISL_652411	hCoV-19/England/NOTT-11C7ED/2020	2020-11-17	Europe / United Kingdom / England	Human		unknown	unknown	unknown	Original			B.1.177.4	GV	Oxford Nanopore
EPI_ISL_652412	hCoV-19/England/NOTT-11C826/2020	2020-11-17	Europe / United Kingdom / England	Human		unknown	unknown	unknown	Original			B.1.177	GV	Oxford Nanopore
EPI_ISL_654799	hCoV-19/Australia/SAP553/2020	2020-11-16	Oceania / Australia / South Australia	Human	unknown	Male	60	unknown	Original		unknown	B.1.36	GH	Illumina MiSeq		NS8_E19stop results in 85.1% truncation of the protein sequence.	info
EPI_ISL_654800	hCoV-19/Australia/SAP556/2020	2020-11-16	Oceania / Australia / South Australia	Human	unknown	Male	23	unknown	Original		unknown	B.1.36	GH	Illumina MiSeq		NS8_E19stop results in 85.1% truncation of the protein sequence.	info
EPI_ISL_654801	hCoV-19/Australia/SAP558/2020	2020-11-16	Oceania / Australia / South Australia	Human		unknown	unknown	unknown	Original			B.1.36	GH	Illumina MiSeq		NS8_E19stop results in 85.1% truncation of the protein sequence.	info
EPI_ISL_654802	hCoV-19/Australia/SAP559/2020	2020-11-16	Oceania / Australia / South Australia	Human		unknown	unknown	unknown	Original			B.1.36	GH	Illumina MiSeq		NS8_E19stop results in 85.1% truncation of the protein sequence.	info
EPI_ISL_654803	hCoV-19/Australia/SAP560/2020	2020-11-16	Oceania / Australia / South Australia	Human		unknown	unknown	unknown	Original			B.1.36	GH	Illumina MiSeq		NS8_E19stop results in 85.1% truncation of the protein sequence.	info
EPI_ISL_654804	hCoV-19/Australia/SAP561/2020	2020-11-16	Oceania / Australia / South Australia	Human		unknown	unknown	unknown	Original			B.1.36	GH	Illumina MiSeq		NS8_E19stop results in 85.1% truncation of the protein sequence.	info
EPI_ISL_654805	hCoV-19/Australia/SAP562/2020	2020-11-16	Oceania / Australia / South Australia	Human		unknown	unknown	unknown	Original			B.1.36	GH	Illumina MiSeq		NS8_E19stop results in 85.1% truncation of the protein sequence.	info
EPI_ISL_654806	hCoV-19/Australia/SAP563/2020	2020-11-16	Oceania / Australia / South Australia	Human		unknown	unknown	unknown	Original			B.1.36	GH	Illumina MiSeq		NS8_E19stop results in 85.1% truncation of the protein sequence.	info
EPI_ISL_654808	hCoV-19/Australia/SAP565/2020	2020-11-16	Oceania / Australia / South Australia	Human		unknown	unknown	unknown	Original			B.1.36	GH	Illumina MiSeq		NS8_E19stop results in 85.1% truncation of the protein sequence.	info
EPI_ISL_660070	hCoV-19/Ecuador/ZZL-4/2020	2020-11-26	South America / Ecuador / Quito	Human		Male	28	Live	Original			B.1.1.4	O	Illumina MiSeq
EPI_ISL_660229	hCoV-19/South Africa/KRISP-K004531-CS1/2020	2020-11-16	Africa / South Africa / KwaZulu-Natal / eThekwini	Human		Male	27	Live	Original	Oropharyngeal swab		B.1.1.74	GR	Illumina MiSeq	Genome Detective 1.126 bcftools mpileup
EPI_ISL_660231	hCoV-19/South Africa/KRISP-K004533-CS1/2020	2020-11-16	Africa / South Africa / KwaZulu-Natal / eThekwini	Human		Female	36	Live	Original	Oropharyngeal swab		B.1.1.74	GR	Illumina MiSeq	Genome Detective 1.126 bcftools mpileup
EPI_ISL_660232	hCoV-19/South Africa/KRISP-K004534-CS1/2020	2020-11-17	Africa / South Africa / KwaZulu-Natal / eThekwini	Human		Male	21	Live	Original	Oropharyngeal swab		B.1.1.254	GR	Illumina MiSeq	Genome Detective 1.126 bcftools mpileup
EPI_ISL_660256	hCoV-19/South Africa/KRISP-K004723-CS1/2020	2020-11-18	Africa / South Africa / KwaZulu-Natal / eThekwini	Human		Male	21	Live	Original	Oropharyngeal swab		B.1.1.254	GR	Illumina MiSeq	Genome Detective 1.126 bcftools mpileup
EPI_ISL_660257	hCoV-19/South Africa/KRISP-K004724-CS1/2020	2020-11-18	Africa / South Africa / KwaZulu-Natal / eThekwini	Human		Male	28	Live	Original	Oropharyngeal swab		B.1.1.74	GR	Illumina MiSeq	Genome Detective 1.126 bcftools mpileup
EPI_ISL_661218	hCoV-19/Belgium/ULG-10781/2020	2020-11-16	Europe / Belgium / LiÃ¨ge	Human		Female	50	unknown	Original			B.1.221	G	Nanopore MinION	Artic network
EPI_ISL_661219	hCoV-19/Belgium/ULG-10783/2020	2020-11-16	Europe / Belgium / LiÃ¨ge	Human		Female	32	unknown	Original			B.1.221	G	Nanopore MinION	Artic network
EPI_ISL_661220	hCoV-19/Belgium/ULG-10784/2020	2020-11-16	Europe / Belgium / LiÃ¨ge	Human		Female	58	unknown	Original			B.1.221	G	Nanopore MinION	Artic network
EPI_ISL_661222	hCoV-19/Belgium/ULG-10787/2020	2020-11-16	Europe / Belgium / LiÃ¨ge	Human		Male	57	unknown	Original			B.1.221	G	Nanopore MinION	Artic network
EPI_ISL_661224	hCoV-19/Belgium/ULG-10789/2020	2020-11-16	Europe / Belgium / LiÃ¨ge	Human		Female	68	unknown	Original			B.1.221	G	Nanopore MinION	Artic network
EPI_ISL_661225	hCoV-19/Belgium/ULG-10790/2020	2020-11-16	Europe / Belgium / LiÃ¨ge	Human		Male	51	unknown	Original			B.1.221	G	Nanopore MinION	Artic network
EPI_ISL_661226	hCoV-19/Belgium/ULG-10791/2020	2020-11-16	Europe / Belgium / LiÃ¨ge	Human		Male	35	unknown	Original			B.1.221	G	Nanopore MinION	Artic network
EPI_ISL_661228	hCoV-19/Belgium/ULG-10794/2020	2020-11-16	Europe / Belgium / LiÃ¨ge	Human		Female	41	unknown	Original			B.1.221	G	Nanopore MinION	Artic network
EPI_ISL_661230	hCoV-19/Belgium/ULG-10800/2020	2020-11-17	Europe / Belgium / LiÃ¨ge	Human		Male	79	unknown	Original			B.1.221	G	Nanopore MinION	Artic network
EPI_ISL_661231	hCoV-19/Belgium/ULG-10801/2020	2020-11-17	Europe / Belgium / LiÃ¨ge	Human		Female	42	unknown	Original			B.1.221	G	Nanopore MinION	Artic network
EPI_ISL_661232	hCoV-19/Belgium/ULG-10803/2020	2020-11-17	Europe / Belgium / LiÃ¨ge	Human		Female	35	unknown	Original			B.1.221	G	Nanopore MinION	Artic network
EPI_ISL_661233	hCoV-19/Belgium/ULG-10806/2020	2020-11-17	Europe / Belgium / LiÃ¨ge	Human		Male	42	unknown	Original			B.1.221	G	Nanopore MinION	Artic network
EPI_ISL_661234	hCoV-19/Belgium/ULG-10807/2020	2020-11-17	Europe / Belgium / LiÃ¨ge	Human		Female	33	unknown	Original			B.1.221	G	Nanopore MinION	Artic network
EPI_ISL_661236	hCoV-19/Belgium/ULG-10811/2020	2020-11-17	Europe / Belgium / LiÃ¨ge	Human		Female	51	unknown	Original			B.1.177	GV	Nanopore MinION	Artic network
EPI_ISL_661238	hCoV-19/Belgium/ULG-10813/2020	2020-11-17	Europe / Belgium / LiÃ¨ge	Human		Male	63	unknown	Original			B.1.221	G	Nanopore MinION	Artic network
EPI_ISL_661239	hCoV-19/Belgium/ULG-10814/2020	2020-11-17	Europe / Belgium / LiÃ¨ge	Human		Female	85	unknown	Original			B.1.221	G	Nanopore MinION	Artic network
EPI_ISL_661240	hCoV-19/Belgium/ULG-10816/2020	2020-11-17	Europe / Belgium / LiÃ¨ge	Human		Female	22	unknown	Original			B.1.221	G	Nanopore MinION	Artic network
EPI_ISL_661241	hCoV-19/Belgium/ULG-10817/2020	2020-11-17	Europe / Belgium / LiÃ¨ge	Human		Male	43	unknown	Original			B.1.221	G	Nanopore MinION	Artic network
EPI_ISL_661258	hCoV-19/New Zealand/20CV0572/2020	2020-11-17	Oceania / New Zealand / Auckland	Human		Female	unknown	unknown	Original	Nasopharyngeal swab		B.1.177	GV	Nanopore MinION
EPI_ISL_665005	hCoV-19/England/CAMB-1BB2EF/2020	2020-11-16	Europe / United Kingdom / England	Human		unknown	unknown	unknown	Original			B.1.177	GV	Oxford Nanopore
EPI_ISL_665013	hCoV-19/England/CAMB-1BB5E6/2020	2020-11-22	Europe / United Kingdom / England	Human		unknown	unknown	unknown	Original			B.1.177.6	GV	Oxford Nanopore
EPI_ISL_665636	hCoV-19/England/LOND-1251241/2020	2020-11-16	Europe / United Kingdom / England	Human		unknown	unknown	unknown	Original			B.1.1.7	GR	Illumina		NS8_Q27stop results in 78.5% truncation of the protein sequence. Gap of 19 nucleotides when compared to the reference sequence.	info
EPI_ISL_665641	hCoV-19/Scotland/CVR5861/2020	2020-11-17	Europe / United Kingdom / Scotland	Human		unknown	unknown	unknown	Original			B.1.1.7	GR	Oxford Nanopore		NS8_Q27stop results in 78.5% truncation of the protein sequence. Gap of 19 nucleotides when compared to the reference sequence.	info
EPI_ISL_665840	hCoV-19/England/LOND-1251250/2020	2020-11-16	Europe / United Kingdom / England	Human		unknown	unknown	unknown	Original			B.1.1.216	GR	Illumina
EPI_ISL_665841	hCoV-19/England/LOND-125126F/2020	2020-11-17	Europe / United Kingdom / England	Human		unknown	unknown	unknown	Original			B.1.1.216	GR	Illumina
EPI_ISL_665848	hCoV-19/England/LOND-125140F/2020	2020-11-16	Europe / United Kingdom / England	Human		unknown	unknown	unknown	Original			B.1.177.4	G	Illumina
EPI_ISL_665908	hCoV-19/England/NOTT-11CF03/2020	2020-11-19	Europe / United Kingdom / England	Human		unknown	unknown	unknown	Original			B.1.177	G	Oxford Nanopore
EPI_ISL_665910	hCoV-19/England/NOTT-11CFB8/2020	2020-11-20	Europe / United Kingdom / England	Human		unknown	unknown	unknown	Original			B.1.177	GV	Oxford Nanopore
EPI_ISL_665911	hCoV-19/England/NOTT-11CFC7/2020	2020-11-20	Europe / United Kingdom / England	Human		unknown	unknown	unknown	Original			B.1.177	GV	Oxford Nanopore
EPI_ISL_665914	hCoV-19/England/NOTT-11D00F/2020	2020-11-20	Europe / United Kingdom / England	Human		unknown	unknown	unknown	Original			B.1.177	GV	Oxford Nanopore
EPI_ISL_665916	hCoV-19/England/NOTT-11D0B4/2020	2020-11-20	Europe / United Kingdom / England	Human		unknown	unknown	unknown	Original			B.1.177.16	GV	Oxford Nanopore
EPI_ISL_665918	hCoV-19/England/NOTT-11D157/2020	2020-11-20	Europe / United Kingdom / England	Human		unknown	unknown	unknown	Original			B.1.177	GV	Oxford Nanopore
EPI_ISL_665923	hCoV-19/England/NOTT-11D272/2020	2020-11-21	Europe / United Kingdom / England	Human		unknown	unknown	unknown	Original			B.1.177	G	Oxford Nanopore
EPI_ISL_665924	hCoV-19/England/NOTT-11D281/2020	2020-11-21	Europe / United Kingdom / England	Human		unknown	unknown	unknown	Original			B.1.221	G	Oxford Nanopore
EPI_ISL_665925	hCoV-19/England/NOTT-11D315/2020	2020-11-21	Europe / United Kingdom / England	Human		unknown	unknown	unknown	Original			B.1.177.15	G	Oxford Nanopore
EPI_ISL_665926	hCoV-19/England/NOTT-11D333/2020	2020-11-21	Europe / United Kingdom / England	Human		unknown	unknown	unknown	Original			B.1.177	GV	Oxford Nanopore
EPI_ISL_665927	hCoV-19/England/NOTT-11D3BB/2020	2020-11-22	Europe / United Kingdom / England	Human		unknown	unknown	unknown	Original			B.1.177	GV	Oxford Nanopore
EPI_ISL_665932	hCoV-19/England/NOTT-11D4A9/2020	2020-11-22	Europe / United Kingdom / England	Human		unknown	unknown	unknown	Original			B.1.177.16	GV	Oxford Nanopore
EPI_ISL_665933	hCoV-19/England/NOTT-11D4B8/2020	2020-11-22	Europe / United Kingdom / England	Human		unknown	unknown	unknown	Original			B.1.177	GV	Oxford Nanopore
EPI_ISL_665936	hCoV-19/England/NOTT-11D56A/2020	2020-11-22	Europe / United Kingdom / England	Human		unknown	unknown	unknown	Original			B.1.177	GV	Oxford Nanopore
EPI_ISL_665937	hCoV-19/England/NOTT-11D5A6/2020	2020-11-22	Europe / United Kingdom / England	Human		unknown	unknown	unknown	Original			B.1.177	G	Oxford Nanopore
EPI_ISL_666046	hCoV-19/Scotland/CVR5851/2020	2020-11-16	Europe / United Kingdom / Scotland	Human		unknown	unknown	unknown	Original			B.1.177.8	G	Oxford Nanopore
EPI_ISL_666050	hCoV-19/Scotland/CVR5859/2020	2020-11-17	Europe / United Kingdom / Scotland	Human		unknown	unknown	unknown	Original			B.1.177	GV	Oxford Nanopore
EPI_ISL_666057	hCoV-19/Scotland/CVR5867/2020	2020-11-17	Europe / United Kingdom / Scotland	Human		unknown	unknown	unknown	Original			B.1.177	G	Oxford Nanopore
EPI_ISL_668601	hCoV-19/Denmark/DCGC-9396/2020	2020-11-16	Europe / Denmark / Nordjylland	Human		unknown	unknown	unknown	Original			B.1.258	G	Oxford Nanopore	ARTIC-ncov2019 v1.1.0	NS8_Q18stop results in 86.0% truncation of the protein sequence. Gap of 6 nucleotides when compared to the reference sequence.	info
EPI_ISL_668606	hCoV-19/Denmark/DCGC-9229/2020	2020-11-16	Europe / Denmark / Syddanmark	Human		unknown	unknown	unknown	Original			B.1	G	Oxford Nanopore	ARTIC-ncov2019 v1.1.0	NS8_E19stop results in 85.1% truncation of the protein sequence.	info
EPI_ISL_668635	hCoV-19/Denmark/DCGC-9271/2020	2020-11-16	Europe / Denmark / Syddanmark	Human		unknown	unknown	unknown	Original			B.1.160	GH	Oxford Nanopore	ARTIC-ncov2019 v1.1.0	Gap of 9 nucleotides when compared to the reference sequence.	info
EPI_ISL_668636	hCoV-19/Denmark/DCGC-9292/2020	2020-11-16	Europe / Denmark / Nordjylland	Human		unknown	unknown	unknown	Original			M.1	GR	Oxford Nanopore	ARTIC-ncov2019 v1.1.0	Gap of 9 nucleotides when compared to the reference sequence.	info
EPI_ISL_668663	hCoV-19/Denmark/DCGC-9250/2020	2020-11-16	Europe / Denmark / Syddanmark	Human		unknown	unknown	unknown	Original			B.1.258.8	G	Oxford Nanopore	ARTIC-ncov2019 v1.1.0	Gap of 6 nucleotides when compared to the reference sequence.	info
EPI_ISL_668667	hCoV-19/Denmark/DCGC-9267/2020	2020-11-16	Europe / Denmark / Nordjylland	Human		unknown	unknown	unknown	Original			B.1.258	G	Oxford Nanopore	ARTIC-ncov2019 v1.1.0	Gap of 6 nucleotides when compared to the reference sequence.	info
EPI_ISL_668668	hCoV-19/Denmark/DCGC-9274/2020	2020-11-16	Europe / Denmark / Syddanmark	Human		unknown	unknown	unknown	Original			B.1.258.9	G	Oxford Nanopore	ARTIC-ncov2019 v1.1.0	Gap of 6 nucleotides when compared to the reference sequence.	info
EPI_ISL_668669	hCoV-19/Denmark/DCGC-9285/2020	2020-11-16	Europe / Denmark / Nordjylland	Human		unknown	unknown	unknown	Original			B.1.258	G	Oxford Nanopore	ARTIC-ncov2019 v1.1.0	Gap of 6 nucleotides when compared to the reference sequence.	info
EPI_ISL_668671	hCoV-19/Denmark/DCGC-9313/2020	2020-11-16	Europe / Denmark / Nordjylland	Human		unknown	unknown	unknown	Original			B.1.258.8	G	Oxford Nanopore	ARTIC-ncov2019 v1.1.0	Gap of 6 nucleotides when compared to the reference sequence.	info
EPI_ISL_668672	hCoV-19/Denmark/DCGC-9354/2020	2020-11-16	Europe / Denmark / Midtjylland	Human		unknown	unknown	unknown	Original			B.1.258.8	G	Oxford Nanopore	ARTIC-ncov2019 v1.1.0	Gap of 6 nucleotides when compared to the reference sequence.	info
EPI_ISL_668718	hCoV-19/Denmark/DCGC-9318/2020	2020-11-16	Europe / Denmark / Nordjylland	Human		unknown	unknown	unknown	Original			B.1.177	GV	Oxford Nanopore	ARTIC-ncov2019 v1.1.0	Gap of 3 nucleotides when compared to the reference sequence.	info
EPI_ISL_668719	hCoV-19/Denmark/DCGC-9321/2020	2020-11-16	Europe / Denmark / Nordjylland	Human		unknown	unknown	unknown	Original			B.1.177	GV	Oxford Nanopore	ARTIC-ncov2019 v1.1.0	Gap of 3 nucleotides when compared to the reference sequence.	info
EPI_ISL_668853	hCoV-19/Denmark/DCGC-9213/2020	2020-11-16	Europe / Denmark / Nordjylland	Human		unknown	unknown	unknown	Original			B.1.127	G	Oxford Nanopore	ARTIC-ncov2019 v1.1.0
EPI_ISL_668855	hCoV-19/Denmark/DCGC-9215/2020	2020-11-16	Europe / Denmark / Nordjylland	Human		unknown	unknown	unknown	Original			B.1.1.153	GR	Oxford Nanopore	ARTIC-ncov2019 v1.1.0
EPI_ISL_668858	hCoV-19/Denmark/DCGC-9222/2020	2020-11-16	Europe / Denmark / Nordjylland	Human		unknown	unknown	unknown	Original			B.1.177.24	GV	Oxford Nanopore	ARTIC-ncov2019 v1.1.0
EPI_ISL_668859	hCoV-19/Denmark/DCGC-9224/2020	2020-11-16	Europe / Denmark / Hovedstaden	Human		unknown	unknown	unknown	Original			B.1.177.21	GV	Oxford Nanopore	ARTIC-ncov2019 v1.1.0
EPI_ISL_668861	hCoV-19/Denmark/DCGC-9226/2020	2020-11-16	Europe / Denmark / Syddanmark	Human		unknown	unknown	unknown	Original			B.1.177.21	GV	Oxford Nanopore	ARTIC-ncov2019 v1.1.0
EPI_ISL_668863	hCoV-19/Denmark/DCGC-9234/2020	2020-11-16	Europe / Denmark / Nordjylland	Human		unknown	unknown	unknown	Original			B.1.127	G	Oxford Nanopore	ARTIC-ncov2019 v1.1.0
EPI_ISL_668867	hCoV-19/Denmark/DCGC-9240/2020	2020-11-16	Europe / Denmark / Midtjylland	Human		unknown	unknown	unknown	Original			B.1.88.1	G	Oxford Nanopore	ARTIC-ncov2019 v1.1.0
EPI_ISL_668868	hCoV-19/Denmark/DCGC-9242/2020	2020-11-16	Europe / Denmark / Nordjylland	Human		unknown	unknown	unknown	Original			B.1.160	GH	Oxford Nanopore	ARTIC-ncov2019 v1.1.0
EPI_ISL_668869	hCoV-19/Denmark/DCGC-9243/2020	2020-11-16	Europe / Denmark / Nordjylland	Human		unknown	unknown	unknown	Original			B.1.88.1	G	Oxford Nanopore	ARTIC-ncov2019 v1.1.0
EPI_ISL_668870	hCoV-19/Denmark/DCGC-9244/2020	2020-11-16	Europe / Denmark / Nordjylland	Human		unknown	unknown	unknown	Original			B.1.160	GH	Oxford Nanopore	ARTIC-ncov2019 v1.1.0
EPI_ISL_668871	hCoV-19/Denmark/DCGC-9245/2020	2020-11-16	Europe / Denmark / Hovedstaden	Human		unknown	unknown	unknown	Original			B.1.177.21	GV	Oxford Nanopore	ARTIC-ncov2019 v1.1.0
EPI_ISL_668872	hCoV-19/Denmark/DCGC-9247/2020	2020-11-16	Europe / Denmark / Hovedstaden	Human		unknown	unknown	unknown	Original			B.1.398	G	Oxford Nanopore	ARTIC-ncov2019 v1.1.0
EPI_ISL_668873	hCoV-19/Denmark/DCGC-9248/2020	2020-11-16	Europe / Denmark / Nordjylland	Human		unknown	unknown	unknown	Original			B.1.1.277	GR	Oxford Nanopore	ARTIC-ncov2019 v1.1.0
EPI_ISL_668874	hCoV-19/Denmark/DCGC-9251/2020	2020-11-16	Europe / Denmark / Nordjylland	Human		unknown	unknown	unknown	Original			B.1.88.1	G	Oxford Nanopore	ARTIC-ncov2019 v1.1.0
EPI_ISL_668875	hCoV-19/Denmark/DCGC-9253/2020	2020-11-16	Europe / Denmark / Syddanmark	Human		unknown	unknown	unknown	Original			B.1.177	GV	Oxford Nanopore	ARTIC-ncov2019 v1.1.0
EPI_ISL_668877	hCoV-19/Denmark/DCGC-9258/2020	2020-11-16	Europe / Denmark / Nordjylland	Human		unknown	unknown	unknown	Original			B.1.127	G	Oxford Nanopore	ARTIC-ncov2019 v1.1.0
EPI_ISL_668878	hCoV-19/Denmark/DCGC-9260/2020	2020-11-16	Europe / Denmark / Midtjylland	Human		unknown	unknown	unknown	Original			B.1.127	G	Oxford Nanopore	ARTIC-ncov2019 v1.1.0
EPI_ISL_668880	hCoV-19/Denmark/DCGC-9270/2020	2020-11-16	Europe / Denmark / Nordjylland	Human		unknown	unknown	unknown	Original			B.1.1.219	GR	Oxford Nanopore	ARTIC-ncov2019 v1.1.0
EPI_ISL_668881	hCoV-19/Denmark/DCGC-9273/2020	2020-11-16	Europe / Denmark / Nordjylland	Human		unknown	unknown	unknown	Original			B.1.406	G	Oxford Nanopore	ARTIC-ncov2019 v1.1.0
EPI_ISL_668883	hCoV-19/Denmark/DCGC-9276/2020	2020-11-16	Europe / Denmark / Nordjylland	Human		unknown	unknown	unknown	Original			B.1.1.302	GR	Oxford Nanopore	ARTIC-ncov2019 v1.1.0
EPI_ISL_668884	hCoV-19/Denmark/DCGC-9278/2020	2020-11-16	Europe / Denmark / Nordjylland	Human		unknown	unknown	unknown	Original			B.1.177.21	GV	Oxford Nanopore	ARTIC-ncov2019 v1.1.0
EPI_ISL_668885	hCoV-19/Denmark/DCGC-9279/2020	2020-11-16	Europe / Denmark / Nordjylland	Human		unknown	unknown	unknown	Original			B.1.177.24	GV	Oxford Nanopore	ARTIC-ncov2019 v1.1.0
EPI_ISL_668887	hCoV-19/Denmark/DCGC-9283/2020	2020-11-16	Europe / Denmark / Nordjylland	Human		unknown	unknown	unknown	Original			B.1.177.24	GV	Oxford Nanopore	ARTIC-ncov2019 v1.1.0
EPI_ISL_668889	hCoV-19/Denmark/DCGC-9291/2020	2020-11-16	Europe / Denmark / Nordjylland	Human		unknown	unknown	unknown	Original			B.1.1.302	GR	Oxford Nanopore	ARTIC-ncov2019 v1.1.0
EPI_ISL_668893	hCoV-19/Denmark/DCGC-9298/2020	2020-11-16	Europe / Denmark / Nordjylland	Human		unknown	unknown	unknown	Original			B.1	GH	Oxford Nanopore	ARTIC-ncov2019 v1.1.0
EPI_ISL_668894	hCoV-19/Denmark/DCGC-9299/2020	2020-11-16	Europe / Denmark / Nordjylland	Human		unknown	unknown	unknown	Original			B.1.177.21	GV	Oxford Nanopore	ARTIC-ncov2019 v1.1.0
EPI_ISL_668896	hCoV-19/Denmark/DCGC-9302/2020	2020-11-16	Europe / Denmark / Nordjylland	Human		unknown	unknown	unknown	Original			B.1.160	GH	Oxford Nanopore	ARTIC-ncov2019 v1.1.0
EPI_ISL_668900	hCoV-19/Denmark/DCGC-9306/2020	2020-11-16	Europe / Denmark / Nordjylland	Human		unknown	unknown	unknown	Original			B.1.177.24	GV	Oxford Nanopore	ARTIC-ncov2019 v1.1.0
EPI_ISL_668903	hCoV-19/Denmark/DCGC-9314/2020	2020-11-16	Europe / Denmark / Nordjylland	Human		unknown	unknown	unknown	Original			B.1.127	G	Oxford Nanopore	ARTIC-ncov2019 v1.1.0
EPI_ISL_668904	hCoV-19/Denmark/DCGC-9315/2020	2020-11-16	Europe / Denmark / Nordjylland	Human		unknown	unknown	unknown	Original			B.1.1.1	GR	Oxford Nanopore	ARTIC-ncov2019 v1.1.0
EPI_ISL_668905	hCoV-19/Denmark/DCGC-9319/2020	2020-11-16	Europe / Denmark / Nordjylland	Human		unknown	unknown	unknown	Original			B.1.127	G	Oxford Nanopore	ARTIC-ncov2019 v1.1.0
EPI_ISL_668907	hCoV-19/Denmark/DCGC-9322/2020	2020-11-16	Europe / Denmark / Nordjylland	Human		unknown	unknown	unknown	Original			B.1.127	G	Oxford Nanopore	ARTIC-ncov2019 v1.1.0
EPI_ISL_668908	hCoV-19/Denmark/DCGC-9326/2020	2020-11-16	Europe / Denmark / Midtjylland	Human		unknown	unknown	unknown	Original			B.1.127	G	Oxford Nanopore	ARTIC-ncov2019 v1.1.0
EPI_ISL_668909	hCoV-19/Denmark/DCGC-9328/2020	2020-11-16	Europe / Denmark / Nordjylland	Human		unknown	unknown	unknown	Original			B.1.177	GV	Oxford Nanopore	ARTIC-ncov2019 v1.1.0
EPI_ISL_668910	hCoV-19/Denmark/DCGC-9329/2020	2020-11-16	Europe / Denmark / Nordjylland	Human		unknown	unknown	unknown	Original			B.1.127	G	Oxford Nanopore	ARTIC-ncov2019 v1.1.0
EPI_ISL_668911	hCoV-19/Denmark/DCGC-9330/2020	2020-11-16	Europe / Denmark / Nordjylland	Human		unknown	unknown	unknown	Original			B.1.1.153	GR	Oxford Nanopore	ARTIC-ncov2019 v1.1.0
EPI_ISL_668912	hCoV-19/Denmark/DCGC-9333/2020	2020-11-16	Europe / Denmark / Nordjylland	Human		unknown	unknown	unknown	Original			B.1.258	G	Oxford Nanopore	ARTIC-ncov2019 v1.1.0
EPI_ISL_668913	hCoV-19/Denmark/DCGC-9334/2020	2020-11-16	Europe / Denmark / Nordjylland	Human		unknown	unknown	unknown	Original			B.1.177	GV	Oxford Nanopore	ARTIC-ncov2019 v1.1.0
EPI_ISL_668914	hCoV-19/Denmark/DCGC-9337/2020	2020-11-16	Europe / Denmark / Nordjylland	Human		unknown	unknown	unknown	Original			B.1.177.24	GV	Oxford Nanopore	ARTIC-ncov2019 v1.1.0
EPI_ISL_668915	hCoV-19/Denmark/DCGC-9338/2020	2020-11-16	Europe / Denmark / Nordjylland	Human		unknown	unknown	unknown	Original			B.1.127	G	Oxford Nanopore	ARTIC-ncov2019 v1.1.0
EPI_ISL_668918	hCoV-19/Denmark/DCGC-9341/2020	2020-11-16	Europe / Denmark / Nordjylland	Human		unknown	unknown	unknown	Original			B.1.258	G	Oxford Nanopore	ARTIC-ncov2019 v1.1.0
EPI_ISL_668923	hCoV-19/Denmark/DCGC-9352/2020	2020-11-16	Europe / Denmark / Syddanmark	Human		unknown	unknown	unknown	Original			B.1.177.21	GV	Oxford Nanopore	ARTIC-ncov2019 v1.1.0
EPI_ISL_668924	hCoV-19/Denmark/DCGC-9353/2020	2020-11-16	Europe / Denmark / Hovedstaden	Human		unknown	unknown	unknown	Original			B.1.36.25	GH	Oxford Nanopore	ARTIC-ncov2019 v1.1.0
EPI_ISL_668925	hCoV-19/Denmark/DCGC-9355/2020	2020-11-16	Europe / Denmark / Syddanmark	Human		unknown	unknown	unknown	Original			B.1.177.21	GV	Oxford Nanopore	ARTIC-ncov2019 v1.1.0
EPI_ISL_668927	hCoV-19/Denmark/DCGC-9360/2020	2020-11-16	Europe / Denmark / Sjaelland	Human		unknown	unknown	unknown	Original			B.1.177.21	GV	Oxford Nanopore	ARTIC-ncov2019 v1.1.0
EPI_ISL_668928	hCoV-19/Denmark/DCGC-9361/2020	2020-11-16	Europe / Denmark / Hovedstaden	Human		unknown	unknown	unknown	Original			B.1.177	GV	Oxford Nanopore	ARTIC-ncov2019 v1.1.0
EPI_ISL_668930	hCoV-19/Denmark/DCGC-9364/2020	2020-11-16	Europe / Denmark / Hovedstaden	Human		unknown	unknown	unknown	Original			B.1.177	GV	Oxford Nanopore	ARTIC-ncov2019 v1.1.0
EPI_ISL_668931	hCoV-19/Denmark/DCGC-9367/2020	2020-11-16	Europe / Denmark / Hovedstaden	Human		unknown	unknown	unknown	Original			B.1.177.21	GV	Oxford Nanopore	ARTIC-ncov2019 v1.1.0
EPI_ISL_668932	hCoV-19/Denmark/DCGC-9368/2020	2020-11-16	Europe / Denmark / Syddanmark	Human		unknown	unknown	unknown	Original			B.1.160	GH	Oxford Nanopore	ARTIC-ncov2019 v1.1.0
EPI_ISL_668933	hCoV-19/Denmark/DCGC-9369/2020	2020-11-16	Europe / Denmark / Sjaelland	Human		unknown	unknown	unknown	Original			B.1.1.74	GR	Oxford Nanopore	ARTIC-ncov2019 v1.1.0
EPI_ISL_668936	hCoV-19/Denmark/DCGC-9373/2020	2020-11-16	Europe / Denmark / Hovedstaden	Human		unknown	unknown	unknown	Original			B.1.221	G	Oxford Nanopore	ARTIC-ncov2019 v1.1.0
EPI_ISL_668937	hCoV-19/Denmark/DCGC-9374/2020	2020-11-16	Europe / Denmark / Sjaelland	Human		unknown	unknown	unknown	Original			B.1.177.21	GV	Oxford Nanopore	ARTIC-ncov2019 v1.1.0
EPI_ISL_668940	hCoV-19/Denmark/DCGC-9378/2020	2020-11-16	Europe / Denmark / Sjaelland	Human		unknown	unknown	unknown	Original			B.1.1.74	GR	Oxford Nanopore	ARTIC-ncov2019 v1.1.0
EPI_ISL_668943	hCoV-19/Denmark/DCGC-9384/2020	2020-11-16	Europe / Denmark / Midtjylland	Human		unknown	unknown	unknown	Original			B.1.1.238	GR	Oxford Nanopore	ARTIC-ncov2019 v1.1.0
EPI_ISL_668944	hCoV-19/Denmark/DCGC-9386/2020	2020-11-16	Europe / Denmark / Sjaelland	Human		unknown	unknown	unknown	Original			B.1.1.74	GR	Oxford Nanopore	ARTIC-ncov2019 v1.1.0
EPI_ISL_668946	hCoV-19/Denmark/DCGC-9390/2020	2020-11-16	Europe / Denmark / Syddanmark	Human		unknown	unknown	unknown	Original			B.1.1.302	GR	Oxford Nanopore	ARTIC-ncov2019 v1.1.0
EPI_ISL_668947	hCoV-19/Denmark/DCGC-9394/2020	2020-11-16	Europe / Denmark / Sjaelland	Human		unknown	unknown	unknown	Original			B.1.160	GH	Oxford Nanopore	ARTIC-ncov2019 v1.1.0
EPI_ISL_668948	hCoV-19/Denmark/DCGC-9395/2020	2020-11-16	Europe / Denmark / Midtjylland	Human		unknown	unknown	unknown	Original			B.1.127	G	Oxford Nanopore	ARTIC-ncov2019 v1.1.0
EPI_ISL_668949	hCoV-19/Denmark/DCGC-9397/2020	2020-11-16	Europe / Denmark / Nordjylland	Human		unknown	unknown	unknown	Original			B.1.1.153	GR	Oxford Nanopore	ARTIC-ncov2019 v1.1.0
EPI_ISL_668950	hCoV-19/Denmark/DCGC-9398/2020	2020-11-16	Europe / Denmark / Midtjylland	Human		unknown	unknown	unknown	Original			B.1.1.70	GR	Oxford Nanopore	ARTIC-ncov2019 v1.1.0
EPI_ISL_668951	hCoV-19/Denmark/DCGC-9399/2020	2020-11-16	Europe / Denmark / Sjaelland	Human		unknown	unknown	unknown	Original			B.1.177.21	GV	Oxford Nanopore	ARTIC-ncov2019 v1.1.0
EPI_ISL_668952	hCoV-19/Denmark/DCGC-9400/2020	2020-11-16	Europe / Denmark / Sjaelland	Human		unknown	unknown	unknown	Original			B.1.160	GH	Oxford Nanopore	ARTIC-ncov2019 v1.1.0
EPI_ISL_668954	hCoV-19/Denmark/DCGC-9404/2020	2020-11-16	Europe / Denmark / Midtjylland	Human		unknown	unknown	unknown	Original			B.1.1.70	GR	Oxford Nanopore	ARTIC-ncov2019 v1.1.0
EPI_ISL_668956	hCoV-19/Denmark/DCGC-9407/2020	2020-11-16	Europe / Denmark / Nordjylland	Human		unknown	unknown	unknown	Original			B.1.1.153	GR	Oxford Nanopore	ARTIC-ncov2019 v1.1.0
EPI_ISL_671883	hCoV-19/Ireland/D-NVRL-20IRL87996/2020	2020-11-17	Europe / Ireland / Dublin	Human		Female	41-50	unknown	Original	Nasopharyngeal and oropharyngeal swab		B.1.177	GV	Oxford Nanopore MinION	ARTIC v3 Protocol
EPI_ISL_672758	hCoV-19/England/QEUH-BA11E5/2020	2020-11-18	Europe / United Kingdom / England	Human		unknown	unknown	unknown	Original			B.1.177	GV	Illumina NovaSeq
EPI_ISL_672764	hCoV-19/England/QEUH-BA1E66/2020	2020-11-18	Europe / United Kingdom / England	Human		unknown	unknown	unknown	Original			B.1.177	GV	Illumina NovaSeq		NS3_E242stop results in 12.4% truncation of the protein sequence.	info
EPI_ISL_672782	hCoV-19/England/QEUH-BA2A61/2020	2020-11-18	Europe / United Kingdom / England	Human		unknown	unknown	unknown	Original			B.1.177	GV	Illumina NovaSeq
EPI_ISL_672799	hCoV-19/England/QEUH-BA1F36/2020	2020-11-18	Europe / United Kingdom / England	Human		unknown	unknown	unknown	Original			B.1.177	GV	Illumina NovaSeq
EPI_ISL_672837	hCoV-19/England/QEUH-BA3392/2020	2020-11-18	Europe / United Kingdom / England	Human		unknown	unknown	unknown	Original			B.1.1.315	GR	Illumina NovaSeq
EPI_ISL_672850	hCoV-19/England/QEUH-BA33ED/2020	2020-11-18	Europe / United Kingdom / England	Human		unknown	unknown	unknown	Original			B.1.177	GV	Illumina NovaSeq
EPI_ISL_672853	hCoV-19/England/QEUH-BA2E92/2020	2020-11-18	Europe / United Kingdom / England	Human		unknown	unknown	unknown	Original			B.1.177	GV	Illumina NovaSeq
EPI_ISL_672857	hCoV-19/England/QEUH-BA1F18/2020	2020-11-18	Europe / United Kingdom / England	Human		unknown	unknown	unknown	Original			B.1.177	GV	Illumina NovaSeq
EPI_ISL_672864	hCoV-19/England/QEUH-BA2F9F/2020	2020-11-18	Europe / United Kingdom / England	Human		unknown	unknown	unknown	Original			B.1.177	GV	Illumina NovaSeq
EPI_ISL_672894	hCoV-19/England/QEUH-BA2B8C/2020	2020-11-18	Europe / United Kingdom / England	Human		unknown	unknown	unknown	Original			B.1.177	GV	Illumina NovaSeq
EPI_ISL_673288	hCoV-19/England/CAMC-B9A501/2020	2020-11-16	Europe / United Kingdom / England	Human		unknown	unknown	unknown	Original			B.1.221	G	Illumina NovaSeq
EPI_ISL_673443	hCoV-19/England/CAMC-B9A53E/2020	2020-11-16	Europe / United Kingdom / England	Human		unknown	unknown	unknown	Original			B.1.1.7	GR	Illumina NovaSeq		NS8_Q27stop results in 78.5% truncation of the protein sequence. Gap of 19 nucleotides when compared to the reference sequence.	info
EPI_ISL_674863	hCoV-19/England/MILK-B9767A/2020	2020-11-20	Europe / United Kingdom / England	Human		unknown	unknown	unknown	Original			B.1.177	GV	Illumina NovaSeq
EPI_ISL_676491	hCoV-19/Sweden/20-09868/2020	2020-11-22	Europe / Sweden / Kronoberg	Human		Male	58	unknown	Original			B.1.1.37	GR	Ion Torrent S5 XL, Ion AmpliSeq SARS-CoV-2	Torrent suite variantCaller with fill from reference and majority wins
EPI_ISL_676502	hCoV-19/Sweden/20-53499/2020	2020-11-20	Europe / Sweden / Halland	Human		Female	25	unknown	Original			B.1.1.47	GR	Ion Torrent S5 XL, Ion AmpliSeq SARS-CoV-2	Torrent suite variantCaller with fill from reference and majority wins
EPI_ISL_676503	hCoV-19/Sweden/20-53524/2020	2020-11-22	Europe / Sweden / Orebro	Human		Female	60	unknown	Original			B.1.258	G	Ion Torrent S5 XL, Ion AmpliSeq SARS-CoV-2	Torrent suite variantCaller with fill from reference and majority wins	Gap of 6 nucleotides when compared to the reference sequence.	info
EPI_ISL_676504	hCoV-19/Sweden/20-53525/2020	2020-11-22	Europe / Sweden / Orebro	Human		Male	43	unknown	Original			B.1.177	GV	Ion Torrent S5 XL, Ion AmpliSeq SARS-CoV-2	Torrent suite variantCaller with fill from reference and majority wins
EPI_ISL_678261	hCoV-19/Bahrain/600041988_S21_L001/2020	2020-11-22	Asia / Bahrain	Human		unknown	unknown	unknown	Original	Nasopharyngeal swab		B.1.36	GH	Illumina	Aviomix v. 1.0
EPI_ISL_678264	hCoV-19/Bahrain/341016741_S2_L001/2020	2020-11-22	Asia / Bahrain	Human		unknown	unknown	unknown	Original	Nasopharyngeal swab		B.1.1.316	GR	Illumina	Aviomix v. 1.0
EPI_ISL_678265	hCoV-19/Bahrain/341016804_S1_L001/2020	2020-11-22	Asia / Bahrain	Human		unknown	unknown	unknown	Original	Nasopharyngeal swab		B.1.1.212	GR	Illumina	Aviomix v. 1.0
EPI_ISL_678266	hCoV-19/Bahrain/341038078_S3_L001/2020	2020-11-21	Asia / Bahrain	Human		unknown	unknown	unknown	Original	Nasopharyngeal swab		B.1.1.281	GR	Illumina	Aviomix v. 1.0
EPI_ISL_678267	hCoV-19/Bahrain/341051639_S14_L001/2020	2020-11-21	Asia / Bahrain	Human		unknown	unknown	unknown	Original	Nasopharyngeal swab		B.1.1.316	GR	Illumina	Aviomix v. 1.0
EPI_ISL_678456	hCoV-19/Belgium/ULG-10915/2020	2020-11-24	Europe / Belgium / LiÃ¨ge	Human		Female	62	unknown	Original			B.1.221	G	Nanopore MinION	Artic network Midnight-1200 panel
[truncated: 11,679 more rows]

## Sheet: December
Accession.ID	Virus.name	Collection.date	Location	Host	Additional.location.information	Gender	Patient.age	Patient.status	Passage	Specimen	Additional.host.information	Lineage	Clade	Sequencing.technology	Assembly.method	Comment	Comment.type
EPI_ISL_1001236	hCoV-19/Ireland/L-NVRL-79IRL93317/2020	2020-12-14	Europe / Ireland / Leinster	Human		Male	41-50	unknown	Original	Nasopharyngeal and oropharyngeal swab		B.1.1.293	GR	Oxford Nanopore MinION	ARTIC v3 Protocol
EPI_ISL_1001242	hCoV-19/Ireland/WX-NVRL-79IRL93069/2020	2020-12-14	Europe / Ireland / Wexford	Human		Male	51-60	unknown	Original	Nasopharyngeal and oropharyngeal swab		B.1.177	GV	Oxford Nanopore MinION	ARTIC v3 Protocol
EPI_ISL_1001249	hCoV-19/Ireland/D-NVRL-80IRL09065/2020	2020-12-16	Europe / Ireland / Dublin	Human		Male	71-80	unknown	Original	Nasopharyngeal and oropharyngeal swab		B.1.177	GV	Oxford Nanopore MinION	ARTIC v3 Protocol
EPI_ISL_1001250	hCoV-19/Ireland/D-NVRL-80IRL09060/2020	2020-12-16	Europe / Ireland / Dublin	Human		Female	>85	unknown	Original	Nasopharyngeal and oropharyngeal swab		B.1.177	GV	Oxford Nanopore MinION	ARTIC v3 Protocol
EPI_ISL_1001251	hCoV-19/Ireland/D-NVRL-80IRL09088/2020	2020-12-16	Europe / Ireland / Dublin	Human		Male	81-90	unknown	Original	Nasopharyngeal and oropharyngeal swab		B.1.177	GV	Oxford Nanopore MinION	ARTIC v3 Protocol
EPI_ISL_1001253	hCoV-19/Ireland/D-NVRL-80IRL09066/2020	2020-12-16	Europe / Ireland / Dublin	Human		Male	71-80	unknown	Original	Nasopharyngeal and oropharyngeal swab		B.1.177	GV	Oxford Nanopore MinION	ARTIC v3 Protocol
EPI_ISL_1001254	hCoV-19/Ireland/D-NVRL-80IRL09063/2020	2020-12-16	Europe / Ireland / Dublin	Human		Male	>85	unknown	Original	Nasopharyngeal and oropharyngeal swab		B.1.177	GV	Oxford Nanopore MinION	ARTIC v3 Protocol
EPI_ISL_1001255	hCoV-19/Ireland/D-NVRL-80IRL09068/2020	2020-12-16	Europe / Ireland / Dublin	Human		Female	71-80	unknown	Original	Nasopharyngeal and oropharyngeal swab		B.1.177	GV	Oxford Nanopore MinION	ARTIC v3 Protocol
EPI_ISL_1001256	hCoV-19/Ireland/D-NVRL-80IRL09059/2020	2020-12-16	Europe / Ireland / Dublin	Human		Female	71-80	unknown	Original	Nasopharyngeal and oropharyngeal swab		B.1.177	GV	Oxford Nanopore MinION	ARTIC v3 Protocol
EPI_ISL_1001257	hCoV-19/Ireland/L-NVRL-80IRL07745/2020	2020-12-17	Europe / Ireland / Leinster	Human		Male	unknown	unknown	Original	Nasopharyngeal and oropharyngeal swab		B.1.1.293	GR	Oxford Nanopore MinION	ARTIC v3 Protocol
EPI_ISL_1001258	hCoV-19/Ireland/L-NVRL-80IRL07756/2020	2020-12-17	Europe / Ireland / Leinster	Human		Female	unknown	unknown	Original	Nasopharyngeal and oropharyngeal swab		B.1.160	GH	Oxford Nanopore MinION	ARTIC v3 Protocol
EPI_ISL_1001259	hCoV-19/Ireland/L-NVRL-80IRL07757/2020	2020-12-17	Europe / Ireland / Leinster	Human		Male	unknown	unknown	Original	Nasopharyngeal and oropharyngeal swab		B.1.1.293	GR	Oxford Nanopore MinION	ARTIC v3 Protocol
EPI_ISL_1002357	hCoV-19/Switzerland/BS-ETHZ-410774/2020	2020-12-11	Europe / Switzerland / Basel-Stadt	Human		unknown	unknown	unknown	Original	Nasopharyngeal and oropharyngeal swab		B.1.160	GH	Illumina	V-pipe
EPI_ISL_1004713	hCoV-19/Switzerland/ZH-ETHZ-431593/2020	2020-12-31	Europe / Switzerland / Zurich	Human		unknown	unknown	unknown	Original	Nasopharyngeal and oropharyngeal swab		B.1.258.17	G	Illumina	V-pipe	NS8_E64stop results in 47.9% truncation of the protein sequence. Gap of 6 nucleotides when compared to the reference sequence.	info
EPI_ISL_1004714	hCoV-19/Switzerland/AG-ETHZ-431559/2020	2020-12-31	Europe / Switzerland / Aargau	Human		unknown	unknown	unknown	Original	Nasopharyngeal and oropharyngeal swab		B.1.221	G	Illumina	V-pipe
EPI_ISL_1004716	hCoV-19/Switzerland/AG-ETHZ-431560/2020	2020-12-31	Europe / Switzerland / Aargau	Human		unknown	unknown	unknown	Original	Nasopharyngeal and oropharyngeal swab		B.1.221	G	Illumina	V-pipe
EPI_ISL_1004717	hCoV-19/Switzerland/AG-ETHZ-431574/2020	2020-12-31	Europe / Switzerland / Aargau	Human		unknown	unknown	unknown	Original	Nasopharyngeal and oropharyngeal swab		B.1.177	GV	Illumina	V-pipe
EPI_ISL_1004718	hCoV-19/Switzerland/AG-ETHZ-431562/2020	2020-12-31	Europe / Switzerland / Aargau	Human		unknown	unknown	unknown	Original	Nasopharyngeal and oropharyngeal swab		B.1.221	G	Illumina	V-pipe
EPI_ISL_1004719	hCoV-19/Switzerland/BE-ETHZ-431586/2020	2020-12-31	Europe / Switzerland / Bern	Human		unknown	unknown	unknown	Original	Nasopharyngeal and oropharyngeal swab		B.1.160	GH	Illumina	V-pipe
EPI_ISL_1004720	hCoV-19/Switzerland/BE-ETHZ-431588/2020	2020-12-31	Europe / Switzerland / Bern	Human		unknown	unknown	unknown	Original	Nasopharyngeal and oropharyngeal swab		B.1.160	GH	Illumina	V-pipe
EPI_ISL_1004722	hCoV-19/Switzerland/BE-ETHZ-431561/2020	2020-12-31	Europe / Switzerland / Bern	Human		unknown	unknown	unknown	Original	Nasopharyngeal and oropharyngeal swab		B.1.160	GH	Illumina	V-pipe
EPI_ISL_1004723	hCoV-19/Switzerland/LU-ETHZ-431553/2020	2020-12-31	Europe / Switzerland / Lucerne	Human		unknown	unknown	unknown	Original	Nasopharyngeal and oropharyngeal swab		B.1.177	GV	Illumina	V-pipe
EPI_ISL_1004724	hCoV-19/Switzerland/LU-ETHZ-431551/2020	2020-12-31	Europe / Switzerland / Lucerne	Human		unknown	unknown	unknown	Original	Nasopharyngeal and oropharyngeal swab		B.1.221	G	Illumina	V-pipe
EPI_ISL_1004725	hCoV-19/Switzerland/NE-ETHZ-431556/2020	2020-12-31	Europe / Switzerland / Neuchatel	Human		unknown	unknown	unknown	Original	Nasopharyngeal and oropharyngeal swab		B.1.160	GH	Illumina	V-pipe
EPI_ISL_1004726	hCoV-19/Switzerland/SH-ETHZ-431566/2020	2020-12-31	Europe / Switzerland / Schaffhausen	Human		unknown	unknown	unknown	Original	Nasopharyngeal and oropharyngeal swab		B.1.160	GH	Illumina	V-pipe
EPI_ISL_1004727	hCoV-19/Switzerland/SO-ETHZ-431579/2020	2020-12-31	Europe / Switzerland / Solothurn	Human		unknown	unknown	unknown	Original	Nasopharyngeal and oropharyngeal swab		B.1.1.39	GR	Illumina	V-pipe
EPI_ISL_1004729	hCoV-19/Switzerland/SO-ETHZ-431591/2020	2020-12-31	Europe / Switzerland / Solothurn	Human		unknown	unknown	unknown	Original	Nasopharyngeal and oropharyngeal swab		B.1.1.117	GR	Illumina	V-pipe
EPI_ISL_1004730	hCoV-19/Switzerland/SO-ETHZ-431583/2020	2020-12-31	Europe / Switzerland / Solothurn	Human		unknown	unknown	unknown	Original	Nasopharyngeal and oropharyngeal swab		B.1.1.117	GR	Illumina	V-pipe
EPI_ISL_1004734	hCoV-19/Switzerland/SZ-ETHZ-431568/2020	2020-12-31	Europe / Switzerland / Schwyz	Human		unknown	unknown	unknown	Original	Nasopharyngeal and oropharyngeal swab		B.1.177	GV	Illumina	V-pipe
EPI_ISL_1004735	hCoV-19/Switzerland/un-ETHZ-431564/2020	2020-12-31	Europe / Switzerland	Human		unknown	unknown	unknown	Original	Nasopharyngeal and oropharyngeal swab		B.1.160	GH	Illumina	V-pipe
EPI_ISL_1004739	hCoV-19/Switzerland/SG-ETHZ-431451/2020	2020-12-30	Europe / Switzerland / St Gallen	Human		unknown	unknown	unknown	Original	Nasopharyngeal and oropharyngeal swab		B.1.258.17	G	Illumina	V-pipe	NS8_E64stop results in 47.9% truncation of the protein sequence. Gap of 6 nucleotides when compared to the reference sequence.	info
EPI_ISL_1004740	hCoV-19/Switzerland/ZH-ETHZ-431497/2020	2020-12-30	Europe / Switzerland / Zurich	Human		unknown	unknown	unknown	Original	Nasopharyngeal and oropharyngeal swab		B.1.258.17	G	Illumina	V-pipe	NS8_E64stop results in 47.9% truncation of the protein sequence. Gap of 6 nucleotides when compared to the reference sequence.	info
EPI_ISL_1004741	hCoV-19/Switzerland/AG-ETHZ-431549/2020	2020-12-30	Europe / Switzerland / Aargau	Human		unknown	unknown	unknown	Original	Nasopharyngeal and oropharyngeal swab		B.1.258	G	Illumina	V-pipe	Gap of 6 nucleotides when compared to the reference sequence.	info
EPI_ISL_1004742	hCoV-19/Switzerland/AG-ETHZ-431550/2020	2020-12-30	Europe / Switzerland / Aargau	Human		unknown	unknown	unknown	Original	Nasopharyngeal and oropharyngeal swab		B.1.258	G	Illumina	V-pipe	Gap of 6 nucleotides when compared to the reference sequence.	info
EPI_ISL_1004743	hCoV-19/Switzerland/AG-ETHZ-431548/2020	2020-12-30	Europe / Switzerland / Aargau	Human		unknown	unknown	unknown	Original	Nasopharyngeal and oropharyngeal swab		B.1.258	G	Illumina	V-pipe	Gap of 6 nucleotides when compared to the reference sequence.	info
EPI_ISL_1004744	hCoV-19/Switzerland/AG-ETHZ-431543/2020	2020-12-30	Europe / Switzerland / Aargau	Human		unknown	unknown	unknown	Original	Nasopharyngeal and oropharyngeal swab		B.1.258	G	Illumina	V-pipe	Gap of 6 nucleotides when compared to the reference sequence.	info
EPI_ISL_1004747	hCoV-19/Switzerland/AG-ETHZ-431542/2020	2020-12-30	Europe / Switzerland / Aargau	Human		unknown	unknown	unknown	Original	Nasopharyngeal and oropharyngeal swab		B.1.258	G	Illumina	V-pipe	Gap of 6 nucleotides when compared to the reference sequence.	info
EPI_ISL_1004757	hCoV-19/Switzerland/AG-ETHZ-431520/2020	2020-12-30	Europe / Switzerland / Aargau	Human		unknown	unknown	unknown	Original	Nasopharyngeal and oropharyngeal swab		B.1.221	G	Illumina	V-pipe
EPI_ISL_1004758	hCoV-19/Switzerland/AG-ETHZ-431446/2020	2020-12-30	Europe / Switzerland / Aargau	Human		unknown	unknown	unknown	Original	Nasopharyngeal and oropharyngeal swab		B.1.258	G	Illumina	V-pipe
EPI_ISL_1004759	hCoV-19/Switzerland/BE-ETHZ-431523/2020	2020-12-30	Europe / Switzerland / Bern	Human		unknown	unknown	unknown	Original	Nasopharyngeal and oropharyngeal swab		B.1.1	GR	Illumina	V-pipe
EPI_ISL_1004760	hCoV-19/Switzerland/BE-ETHZ-431436/2020	2020-12-30	Europe / Switzerland / Bern	Human		unknown	unknown	unknown	Original	Nasopharyngeal and oropharyngeal swab		B.1.221	G	Illumina	V-pipe
EPI_ISL_1004761	hCoV-19/Switzerland/BS-ETHZ-431509/2020	2020-12-30	Europe / Switzerland / Basel-Stadt	Human		unknown	unknown	unknown	Original	Nasopharyngeal and oropharyngeal swab		B.1.177	GV	Illumina	V-pipe
EPI_ISL_1004762	hCoV-19/Switzerland/BS-ETHZ-431508/2020	2020-12-30	Europe / Switzerland / Basel-Stadt	Human		unknown	unknown	unknown	Original	Nasopharyngeal and oropharyngeal swab		B.1.36.1	GH	Illumina	V-pipe
EPI_ISL_1004764	hCoV-19/Switzerland/GE-ETHZ-431337/2020	2020-12-30	Europe / Switzerland / Geneva	Human		unknown	unknown	unknown	Original	Nasopharyngeal and oropharyngeal swab		B.1.177	GV	Illumina	V-pipe
EPI_ISL_1004765	hCoV-19/Switzerland/SG-ETHZ-431481/2020	2020-12-30	Europe / Switzerland / St Gallen	Human		unknown	unknown	unknown	Original	Nasopharyngeal and oropharyngeal swab		B.1.160	GH	Illumina	V-pipe
EPI_ISL_1004766	hCoV-19/Switzerland/SG-ETHZ-431478/2020	2020-12-30	Europe / Switzerland / St Gallen	Human		unknown	unknown	unknown	Original	Nasopharyngeal and oropharyngeal swab		B.1.160	GH	Illumina	V-pipe
EPI_ISL_1004767	hCoV-19/Switzerland/SG-ETHZ-431482/2020	2020-12-30	Europe / Switzerland / St Gallen	Human		unknown	unknown	unknown	Original	Nasopharyngeal and oropharyngeal swab		B.1.160	GH	Illumina	V-pipe
EPI_ISL_1004768	hCoV-19/Switzerland/SH-ETHZ-431223/2020	2020-12-30	Europe / Switzerland / Schaffhausen	Human		unknown	unknown	unknown	Original	Nasopharyngeal and oropharyngeal swab		B.1.221	G	Illumina	V-pipe
EPI_ISL_1004771	hCoV-19/Switzerland/SH-ETHZ-431516/2020	2020-12-30	Europe / Switzerland / Schaffhausen	Human		unknown	unknown	unknown	Original	Nasopharyngeal and oropharyngeal swab		B.1.160	GH	Illumina	V-pipe
EPI_ISL_1004772	hCoV-19/Switzerland/SH-ETHZ-431504/2020	2020-12-30	Europe / Switzerland / Schaffhausen	Human		unknown	unknown	unknown	Original	Nasopharyngeal and oropharyngeal swab		B.1.221	G	Illumina	V-pipe
EPI_ISL_1004773	hCoV-19/Switzerland/SH-ETHZ-431517/2020	2020-12-30	Europe / Switzerland / Schaffhausen	Human		unknown	unknown	unknown	Original	Nasopharyngeal and oropharyngeal swab		B.1.160	GH	Illumina	V-pipe
EPI_ISL_1004775	hCoV-19/Switzerland/SO-ETHZ-431483/2020	2020-12-30	Europe / Switzerland / Solothurn	Human		unknown	unknown	unknown	Original	Nasopharyngeal and oropharyngeal swab		B.1.177	GV	Illumina	V-pipe
EPI_ISL_1004777	hCoV-19/Switzerland/SZ-ETHZ-431420/2020	2020-12-30	Europe / Switzerland / Schwyz	Human		unknown	unknown	unknown	Original	Nasopharyngeal and oropharyngeal swab		B.1.177	GV	Illumina	V-pipe
EPI_ISL_1004778	hCoV-19/Switzerland/TG-ETHZ-431447/2020	2020-12-30	Europe / Switzerland / Thurgau	Human		unknown	unknown	unknown	Original	Nasopharyngeal and oropharyngeal swab		B.1.177	GV	Illumina	V-pipe
EPI_ISL_1004779	hCoV-19/Switzerland/TG-ETHZ-431441/2020	2020-12-30	Europe / Switzerland / Thurgau	Human		unknown	unknown	unknown	Original	Nasopharyngeal and oropharyngeal swab		B.1.177	GV	Illumina	V-pipe
EPI_ISL_1004780	hCoV-19/Switzerland/TG-ETHZ-431440/2020	2020-12-30	Europe / Switzerland / Thurgau	Human		unknown	unknown	unknown	Original	Nasopharyngeal and oropharyngeal swab		B.1.177	GV	Illumina	V-pipe
EPI_ISL_1004781	hCoV-19/Switzerland/VS-ETHZ-431524/2020	2020-12-30	Europe / Switzerland / Valais	Human		unknown	unknown	unknown	Original	Nasopharyngeal and oropharyngeal swab		B.1.416.1	G	Illumina	V-pipe
EPI_ISL_1004782	hCoV-19/Switzerland/ZH-ETHZ-431533/2020	2020-12-30	Europe / Switzerland / Zurich	Human		unknown	unknown	unknown	Original	Nasopharyngeal and oropharyngeal swab		B.1.160	GH	Illumina	V-pipe
EPI_ISL_1004783	hCoV-19/Switzerland/ZH-ETHZ-431522/2020	2020-12-30	Europe / Switzerland / Zurich	Human		unknown	unknown	unknown	Original	Nasopharyngeal and oropharyngeal swab		B.1.88	G	Illumina	V-pipe
EPI_ISL_1004784	hCoV-19/Switzerland/ZH-ETHZ-431493/2020	2020-12-30	Europe / Switzerland / Zurich	Human		unknown	unknown	unknown	Original	Nasopharyngeal and oropharyngeal swab		B.1.160	GH	Illumina	V-pipe
EPI_ISL_1004788	hCoV-19/Switzerland/ZH-ETHZ-431477/2020	2020-12-30	Europe / Switzerland / Zurich	Human		unknown	unknown	unknown	Original	Nasopharyngeal and oropharyngeal swab		B.1.160	GH	Illumina	V-pipe
EPI_ISL_1004789	hCoV-19/Switzerland/ZH-ETHZ-431487/2020	2020-12-30	Europe / Switzerland / Zurich	Human		unknown	unknown	unknown	Original	Nasopharyngeal and oropharyngeal swab		B.1.1.70	GR	Illumina	V-pipe
EPI_ISL_1004792	hCoV-19/Switzerland/ZH-ETHZ-431485/2020	2020-12-30	Europe / Switzerland / Zurich	Human		unknown	unknown	unknown	Original	Nasopharyngeal and oropharyngeal swab		B.1.177	GV	Illumina	V-pipe
EPI_ISL_1004793	hCoV-19/Switzerland/ZH-ETHZ-431448/2020	2020-12-30	Europe / Switzerland / Zurich	Human		unknown	unknown	unknown	Original	Nasopharyngeal and oropharyngeal swab		B.1.236	G	Illumina	V-pipe
EPI_ISL_1004794	hCoV-19/Switzerland/ZH-ETHZ-431475/2020	2020-12-30	Europe / Switzerland / Zurich	Human		unknown	unknown	unknown	Original	Nasopharyngeal and oropharyngeal swab		B.1.177	GV	Illumina	V-pipe
EPI_ISL_1004795	hCoV-19/Switzerland/ZH-ETHZ-431476/2020	2020-12-30	Europe / Switzerland / Zurich	Human		unknown	unknown	unknown	Original	Nasopharyngeal and oropharyngeal swab		B.1.177	GV	Illumina	V-pipe
EPI_ISL_1004797	hCoV-19/Switzerland/ZH-ETHZ-431505/2020	2020-12-30	Europe / Switzerland / Zurich	Human		unknown	unknown	unknown	Original	Nasopharyngeal and oropharyngeal swab		B.1.160	GH	Illumina	V-pipe
EPI_ISL_1004798	hCoV-19/Switzerland/ZH-ETHZ-431488/2020	2020-12-30	Europe / Switzerland / Zurich	Human		unknown	unknown	unknown	Original	Nasopharyngeal and oropharyngeal swab		B.1.1.70	GR	Illumina	V-pipe
[truncated: 41,060 more rows]

## Sheet: January
Accession.ID	Virus.name	Collection.date	Location	Host	Additional.location.information	Gender	Patient.age	Patient.status	Passage	Specimen	Additional.host.information	Lineage	Clade	Sequencing.technology	Assembly.method	Comment	Comment.type
[truncated: 58,484 more rows]

[truncated: 1 more sheets: February]
