# Supplementary material for: Strategy to Develop and Evaluate a Multiplex RT-ddPCR in Response to SARS-CoV-2 Genomic Evolution
Source: Curr Issues Mol Biol. 2021 Nov 6;43(3):1937–49. doi: 10.3390/cimb43030134 (PMC8928932; doi:10.3390/cimb43030134)
Supplement: Supplementary file 1 [file cimb-43-00134-s001.zip › Supplementary File S3 - SCREENED input.txt]

3_RdRp_IP4	GGTAACTGGTATGATTTCG	CTGGTCAAGGTTAATATAGG	TCATACAAACCACGCCAGG	GGTAACTGGTATGATTTCGGTGATTTCATACAAACCACGCCAGGTAGTGGAGTTCCTGTTGTAGATTCTTATTATTCATTGTTAATGCCTATATTAACCTTGACCAG
9_ORF1a_Lu	AGAAGATTGGTTAGATGATGATAGT	TTCCATCTCTAATTGAGGTTGAACC	TGGTCAACAAGACGGCAGTGAGGA	AGAAGATTGGTTAGATGATGATAGTCAACAAACTGTTGGTCAACAAGACGGCAGTGAGGACAATCAGACAACTACTATTCAAACAATTGTTGAGGTTCAACCTCAATTAGAGATGGAA
